# Supplementary material for: Evaluating the importance of policy amenable factors in explaining influenza vaccination: a cross-sectional multinational study
Source: PubMed Central journal article supplement — BMJ Open. 2017 Jul 12;7(7):e014668. doi: 10.1136/bmjopen-2016-014668 (PMC5734251; doi:10.1136/bmjopen-2016-014668), 2017-07-12
Supplement: bmjopen-2016-014668.draft_revisions.pdf [file bmjopen-2016-014668.draft_revisions.pdf]

# BMJ Open

## Evaluating the importance of policy amenable factors in explaining influenza vaccination: a cross-sectional multinational study

|                                 |                                                                                                                                                                                                                                                                        |
|---------------------------------|------------------------------------------------------------------------------------------------------------------------------------------------------------------------------------------------------------------------------------------------------------------------|
| Journal:                        | <i>BMJ Open</i>                                                                                                                                                                                                                                                        |
| Manuscript ID                   | bmjopen-2016-014668                                                                                                                                                                                                                                                    |
| Article Type:                   | Research                                                                                                                                                                                                                                                               |
| Date Submitted by the Author:   | 11-Oct-2016                                                                                                                                                                                                                                                            |
| Complete List of Authors:       | Wheelock, Ana; Imperial College London, Surgery and Cancer<br>Miraldo, Marisa; Imperial College London, Business School<br>Thomson, Angus; Sanofi Pasteur<br>Vincent, Charles; University of Oxford, Experimental Psychology<br>Sevdalis, Nick; King's College London, |
| <b>Primary Subject Heading</b>: | Health policy                                                                                                                                                                                                                                                          |
| Secondary Subject Heading:      | Public health, Infectious diseases, Patient-centred medicine                                                                                                                                                                                                           |
| Keywords:                       | Influenza, Vaccine, Adult, Beliefs, Perceptions, Behaviour                                                                                                                                                                                                             |
|                                 |                                                                                                                                                                                                                                                                        |

SCHOLARONE™  
Manuscripts

1  
2  
3 **EVALUATING THE IMPORTANCE OF POLICY AMENABLE FACTORS IN**  
4 **EXPLAINING INFLUENZA VACCINATION: A CROSS-SECTIONAL**  
5 **MULTINATIONAL STUDY**  
6  
7

8  
9 Ana Wheelock, PhD<sup>1†</sup>; Marisa Miraldo, PhD<sup>2</sup>; Angus Thomson, PhD<sup>3</sup>; Charles Vincent,  
10 PhD<sup>4</sup>; Nick Sevdalis, PhD<sup>5</sup>  
11  
12

13  
14 <sup>1</sup>Faculty of Medicine, Imperial College London, London, UK; <sup>2</sup>Imperial College Business  
15 School, London, UK; <sup>3</sup>Sanofi Pasteur, Lyon, France; <sup>4</sup>Department of Experimental  
16 Psychology, University of Oxford, Oxford, UK; <sup>5</sup>Centre for Implementation Science, Health  
17 Service and Population Research Department, King's College London, London, UK  
18  
19  
20  
21

22  
23 **CORRESPONDING AUTHOR AND ADDRESS**

24 Ana Wheelock  
25  
26 Imperial College London  
27  
28 Faculty of Medicine, Medical School Building  
29  
30 St Mary's Campus, Norfolk Place  
31  
32 London W2 1PG, United Kingdom  
33  
34 Tel. 0044 207 594 3433. Email: [a.wheelock@imperial.ac.uk](mailto:a.wheelock@imperial.ac.uk)  
35

36 Word count: 5,235

37  
38 Keywords – Influenza, vaccine, adult, beliefs, perceptions, behaviour  
39

40  
41 The Corresponding Author has the right to grant on behalf of all authors and does grant on  
42 behalf of all authors, an exclusive licence (or non exclusive for government employees) on a  
43 worldwide basis to the BMJ Publishing Group Ltd and its Licensees to permit this article (if  
44 accepted) to be published in BMJ editions and any other BMJ PGL products and sublicences  
45 to exploit all subsidiary rights, as set out in their licence  
46  
47

48  
49 (<http://resources.bmj.com/bmj/authors/checklists-forms/licence-for-publication>).  
50  
51  
52  
53  
54  
55  
56  
57  
58  
59  
60

## ABSTRACT

**Objectives:** Despite continuous efforts to improve influenza vaccination coverage, uptake among high-risk groups remains suboptimal. We aimed to identify policy amenable factors associated with vaccination and to measure their importance in order to assist in the monitoring of vaccination sentiment and the design of communication strategies and interventions to improve vaccination rates.

**Setting:** The US, the UK and France.

**Participants:** A total of 2,412 participants were surveyed across the three countries.

**Outcome measures:** Self-reported influenza vaccination.

**Methods:** Between March and April 2014, a stratified random sampling strategy was employed to obtain nationally representative samples in the US, the UK and France through online databases and random-digit dialling. Participants were asked about vaccination practices, perceptions and feelings. Multivariable logistic regression was used to identify factors associated with influenza vaccination.

**Results:** The models were able to explain 64-80% of the variance in vaccination behaviour. Overall, socio-psychological variables, which are inherently amenable to policy, were better at explaining vaccination behaviour than demographic, socio-economic and health variables. Explanatory variables included social influence (physician), influenza and vaccine risk perceptions and traumatic childhood experiences.

**Conclusions:** Our results indicate that evidence-based socio-psychological items should be considered for inclusion into national immunisation surveys to gauge the public's views, identify emerging concerns, and thus proactively and opportunistically address potential barriers and harness vaccination drivers.

## ARTICLE SUMMARY

### Strengths and limitations of this study

- We developed robust regression models comprised of a broad set of variables which have been linked to vaccination behaviour.
- We also used representative samples of the population of interest in three different developed countries (the US, the UK and France).
- The employed survey measures concern the individual and condition perceptions on not having received the vaccine.
- Our research may have suffered from respondent-related biases. For example, people for whom vaccination issues are particularly salient may have been more prone to participate.

## BACKGROUND

Upper respiratory tract infections are a leading cause of mortality and morbidity in high-income countries, mostly among adults<sup>1</sup>. Influenza is a major contributor to this burden of disease; estimates show that up to 49,000 people die every year in the US<sup>2</sup> and 40,000 in the European Union<sup>3</sup> from influenza-related illness. Despite continuous efforts to improve influenza vaccination coverage, uptake among high-risk groups remains low. In 2013/2014, for example, 65% of older adults ( $\geq 65$ s) and 46% of younger adults with eligible health conditions were vaccinated against influenza in the US<sup>4</sup>. In the same season, vaccination rates in the UK, one of the highest in Europe, were 73% in  $\geq 65$ s and 53% in eligible under 65s, both below the minimum 75% coverage recommended by the World Health Organisation<sup>5,6</sup>. Worryingly, a 151% rise in excess winter deaths in England and Wales in 2014/15, partly attributed to the circulation of a mutated A(H3N2) influenza strain which made the vaccine significantly less effective<sup>7</sup>, alongside unseasonable warm weather in 2015/2016, resulted in the lowest vaccination uptake in more than a decade<sup>8</sup>.

Vaccination decisions are shaped by a myriad factors, including demographic, socio-economic and socio-psychological factors<sup>9-12</sup>. The latter are of particular interest, given that they are inherently amenable to policy and behaviour change. Yet, few countries routinely collect data on people's beliefs and perceptions towards vaccination, and those that do often use one open question (e.g. "Why didn't you get a flu shot last winter?")<sup>13</sup>. Although cheaper and easier to administer, this form of enquiry does not take into account people's tendency to fall back on readily available information (e.g. the first thought that comes to mind) or report post-decisional rationalisations of their behaviours (e.g. "I did not vaccinate, hence it must not be necessary") rather than actual drivers<sup>14,15</sup>. Moreover, these data do not allow comparative analyses between vaccinated and unvaccinated people.

Multilateral efforts to measure and improve confidence in vaccines are gathering pace<sup>16,17</sup>, yet they are built upon a body of evidence which, although extensive and insightful, has a number of gaps. One key limitation is that many studies evaluating the link between socio-psychological factors and influenza vaccination do not use multivariable analysis, thus the importance of a given variable in relation to others often remains unknown. Studies that do employ multivariable analysis seldom perform (or report) robustness checks and usually comprise a limited number of variables, which can result in omitted-variable bias, whereby

1  
2  
3 the model compensates for the missing variables by over or underestimating the effect of the  
4 included variables<sup>9, 18-19</sup>. For example, omitted-variable bias could explain why the model  
5 developed by Weinstein et al. – comprised of seven variables – showed that anticipated regret  
6 of not vaccinating was more important than other established influenza perceptions or why  
7 they did not find an association between vaccine effectiveness and vaccination uptake in this  
8 US sample<sup>18</sup>. Moreover, these studies frequently include proxies of vaccination uptake such  
9 as past vaccination or intention to vaccinate as predictors, thereby artificially boosting the  
10 explanatory ability of the model without necessarily explaining real-world behaviours<sup>9, 19</sup>. As  
11 Brewer and colleagues note, other important methodological shortcomings are the prevalent  
12 use of weak survey measures (e.g. generic risk perceptions rather than own perceived risk)  
13 and small convenience samples, which may affect the validity and generalisability of  
14 findings<sup>11</sup>. A related drawback is that most of the evidence in this area is produced in the US,  
15 thus important contextual issues remain unexplored.  
16  
17  
18  
19  
20  
21  
22  
23  
24  
25

26 We sought to address these limitations by developing robust regression models comprised of  
27 a broad set of variables which have been linked to vaccination behaviour – except for proxies  
28 of vaccination –, employing measures that concern the individual and condition perceptions  
29 on not having received the vaccine, and using representative samples of the population of  
30 interest in three different developed countries: the US, the UK and France. In order to assist  
31 in the monitoring of vaccination sentiment and the prioritisation and design of  
32 communication strategies and interventions to increase influenza vaccination across different  
33 contexts, this study aimed to answer three research questions: (1) What are the variables that  
34 robustly explain influenza vaccination uptake? (2) What is the importance of policy amenable  
35 factors in relation to demographic, socio-economic and health characteristics in explaining  
36 vaccination behaviour? (3) Are the factors associated with influenza vaccination comparable  
37 across countries?  
38  
39  
40  
41  
42  
43  
44  
45  
46  
47  
48  
49  
50  
51  
52  
53  
54  
55  
56  
57  
58  
59  
60

## METHODS

### Study sample

Using stratified random sampling, we interviewed nationally representative adult samples from the US, the UK and France, about vaccination between March and April of 2014. Assuming that the correlation coefficient between dependent and independent variables was 0.1 (a small effect size), the minimum sample was calculated to be 782 subjects per country ( $\alpha=0.05$ ;  $1-\beta=80\%$ ) with PASS version 11.

The American Institutes for Research (US) and the Imperial College Research Ethics Committee (UK) granted research ethics approval. The French *Commission nationale de l'informatique et des libertés* and *Comités de protection des personnes* granted waivers to approval. Participants were informed about the nature of the study and provided consent.

### Procedure

A market research company (Double Helix) was responsible for piloting, programming the online survey and conducting the telephone interviews. Seven face-to-face and three telephone pilot interviews were conducted with purposively selected participants to test the survey's face and content validity, and ease of completion. Interviews were conducted by a trained researcher while the rest of the team observed via live broadcast. The pilot showed the survey was easy to complete and understand. The refinements to the study materials were related to wording and format. Self-completion online surveys were then sent to a non-probability online panel and random-digit dialling was employed to recruit a proportion of the 65+ age category and those belonging to D/E socio-economic groups, due to their limited access to or lack of familiarity with internet-based applications<sup>21</sup>. As a quality control measure, participants classified as 'speeders' (completed the survey in half of the average length – 16 minutes) and 'flat-liners' (gave homogenous responses and completed the survey in less than half of the optimum survey length – 20 minutes) were removed and replaced.

## Instrument

The measures reported here are a subset of a larger vaccination survey (available from the authors upon request). Our analyses included 32-34 items (Table S1 in Supplementary material). We selected socio-psychological items that had consistently been linked to influenza vaccination based on existing evidence. These comprised adapted constructs from the Health Belief Model<sup>22</sup> and Protection Motivation Theory<sup>23</sup> – notably, influenza and vaccine risk perceptions, vaccine effectiveness and self-efficacy<sup>9-12, 24</sup> –, perceived knowledge of the vaccine<sup>10</sup> and items assessing trust in key vaccination stakeholders<sup>25</sup>. Additional policy amenable factors which had infrequently been used in the context of vaccination, but were considered potential explanatory variables, were also tested. These were worry of infecting other people (if unvaccinated)<sup>26</sup> – a measure aimed at evaluating the extent to which people vaccinate to protect others –, perceived control over influenza<sup>27, 28</sup>, regret of contracting influenza<sup>29</sup>, childhood traumatic health experiences<sup>30</sup> – to evaluate their influence on adult vaccination behaviour – and health decision-making preferences<sup>31, 32</sup> – to further explore the effect of the doctor-patient relationship on vaccination acceptance. Participants' socio-economic, demographic and health characteristics previously associated with influenza vaccination were prioritised<sup>9, 33</sup>.

We used 11-points likert scales (0-10) for the majority of socio-psychological items, as these are recognised for their reliability and ease of completion<sup>34</sup>, and multiple-choice items and alternate-choice items when appropriate. Except for trust, health decision-making preferences, and childhood traumatic health experiences items, socio-psychological measures were disease or vaccine-specific to avoid misinterpretation, they aimed to capture individuals' own perceived risk (e.g. "With no flu vaccine, I would feel very vulnerable to the flu"), and conditioned risk perceptions on not having received the vaccine (e.g. "Without the flu vaccine, I am sure I would get influenza this winter")<sup>11</sup>. When thematic hierarchy (e.g. from general to specific) was not important, items were rotated to minimise response bias.

## Data analysis

We used the following formula to calculate response rates: number of surveys completed divided by opened emails or interviews attempted minus ineligible individuals. Descriptive



1  
2  
3 statistics, Pearson's Chi-square and t-tests were computed to explore the relationships  
4 between the assessed variables and self-reported vaccination behaviour. The outcome  
5 measure was receiving an influenza vaccine in the last 6 months (2013/2014 influenza  
6 season).  
7  
8

9  
10  
11 Given that the dependent variable was binary, logistic regression analysis was conducted to  
12 identify the variables associated with of influenza vaccination. Four continuous variables  
13 with missing ("I don't know") responses were dichotomised as follows: values expressing  
14 agreement with a given statement (6-10) were coded as 1 = "yes" and the rest (0-5 and "I  
15 don't know") were coded as 0 = "other than yes" (see Tables S2-S4 in Supplementary  
16 material).  
17  
18  
19  
20  
21

22  
23 Although a software-based stepwise approach is widely used in logistic regression, in recent  
24 years the purposeful selection of variables has been favoured over deterministic model-  
25 building methods. This is because the latter tend to rely on automatic selection of variables  
26 based only upon mathematical criteria, which can lead to over-fitting or under-fitting models.  
27 Therefore, we used a manual stepwise, hierarchical approach as follows<sup>35</sup>.  
28  
29  
30  
31

32  
33 Firstly, we developed a model per country entering all the variables at the same time (M1).  
34 Secondly, we manually removed one at a time the variables which were not significant in M1  
35 – resulting in 12 different specifications in the US, 11 in the UK and 22 in France – and  
36 checked the robustness of the results by assessing changes in the relationship between the  
37 independent and dependent variables. We retained as controls all demographic, socio-  
38 economic and health variables. Thirdly, the significant variables and controls were entered in  
39 "blocks" using a hierarchical approach (M2-M8), in order to understand their role in  
40 explaining vaccination behaviour. The order in which the blocks of variables were entered  
41 was based upon previous evidence and our aim of assessing the importance of policy  
42 amenable factors in explaining influenza vaccination. This is because when predictors are  
43 correlated, as it is often the case, the order of variable entry can have an effect on the  
44 estimated model parameters. Thus, variables were entered in a sequence according to their  
45 conceptual importance: variables which had been consistently associated with vaccination  
46 uptake in the past were entered first and those which had been explored less were entered  
47 last. We prioritised demographic, socio-economic and health variables, and practical  
48 vaccination barriers, to allow these variables to account for the variance in vaccination  
49  
50  
51  
52  
53  
54  
55  
56  
57  
58  
59  
60

behaviour before socio-psychological variables were incorporated. Seven blocks of explanatory variables were entered in the following order: 1) demographic, socio-economic and health-related variables; 2) practical barriers to influenza vaccination; 3) social influence; 4) influenza perceptions; 5) influenza vaccine perceptions; 6) trust in vaccination stakeholders; and 7) shared decision-making and childhood experiences.

Two goodness-of-fit tests – chi-square and Nagelkerke  $R^2$  – were used to assess the overall model (M1) and each of the 7 models (blocks) developed using the hierarchical approach. Employing a classification cut-off point of 0.5, a final model with a Nagelkerke  $R^2$  value close to 1, which indicates optimal model fit, was sought.

Thorough checks to ensure the robustness of the models were conducted, including variance inflation factor (VIF) to assess collinearity, standardised residuals to detect and evaluate outliers and Cook's distance to identify influential cases. Separate analyses entering the blocks of variables in reverse order were also performed (i.e. from block 7 to block 1) to evaluate whether the order in which variables were entered significantly modified our results. Data were analysed using IBM SPSS Statistics version 22.

## RESULTS

### Participants

The online survey was completed by 814 participants in the US, 791 in the UK and 787 in France. Online response rates were 20-28%, in line with average rates for internet-based surveys<sup>36</sup>. Eighty participants were interviewed via the telephone in the US, 100 in the UK and 100 in France. Telephone response rates were 6-9%. Telephone interviews targeted older people and those belonging to low socio-economic strata, two populations with particularly low response rates<sup>37</sup>. Recruitment flow diagrams for the online and telephone samples are presented in Figures S1a-S3a and S1b-S3b, respectively (Supplementary material). There were no significant differences between the characteristics of the final samples (US=801; UK=806; France=805; total sample N=2,412) and those of the general population, when available (Table 1).

**Table 1.** Participant characteristics

| Characteristic                       | Categories                | US (N=801) <sup>1</sup> |                          | UK (N=806) <sup>2</sup> |                          | France (N=805) <sup>3</sup> |                          |
|--------------------------------------|---------------------------|-------------------------|--------------------------|-------------------------|--------------------------|-----------------------------|--------------------------|
|                                      |                           | Sample                  | Population               | Sample                  | Population               | Sample                      | Population               |
| Gender                               | Female                    | 50%                     | 51%                      | 52%                     | 51%                      | 53%                         | 52%                      |
| Age                                  | 18-64                     | 80%                     | 80%                      | 77%                     | 77%                      | 76%                         | 76%                      |
|                                      | ≥65                       | 20%                     | 20%                      | 23%                     | 23%                      | 24%                         | 24%                      |
| Ethnicity                            | White                     | 69%                     | 78%                      | 88%                     | 87%                      | -                           | -                        |
|                                      | Other                     | 30%                     | 22%                      | 11%                     | 13%                      | -                           | -                        |
|                                      | Prefer not to say         | 1%                      | -                        | 1%                      | -                        | -                           | -                        |
| Annual household income <sup>a</sup> | <\$50,000/£20,000/€26,000 | 43%                     | -                        | 46%                     | -                        | 53%                         | -                        |
|                                      | ≥\$50,000/£20,000/€26,000 | 49%                     | -                        | 46%                     | -                        | 34%                         | -                        |
|                                      | Prefer not to say         | 8%                      | -                        | 9%                      | -                        | 13%                         | -                        |
| Marital status                       | Living as a couple        | 60%                     | Unavailable <sup>b</sup> | 56%                     | 58%                      | 54%                         | Unavailable <sup>c</sup> |
|                                      | Not living as a couple    | 39%                     | Unavailable <sup>b</sup> | 44%                     | 42%                      | 45%                         | Unavailable <sup>c</sup> |
|                                      | Prefer not to say         | 1%                      | -                        | 1%                      | -                        | 1%                          | -                        |
| Education                            | No university degree      | 41%                     | 71%                      | 60%                     | 73%                      | 64%                         | 76%                      |
|                                      | University degree         | 54%                     | 29%                      | 37%                     | 27%                      | 29%                         | 24%                      |
|                                      | Prefer not to say         | 5%                      | -                        | 3%                      | -                        | 7%                          | -                        |
| Settlement type                      | Urban                     | 76%                     | 81%                      | 77%                     | 81%                      | 78%                         | 78%                      |
|                                      | Rural                     | 24%                     | 19%                      | 23%                     | 19%                      | 22%                         | 22%                      |
| Vaccination status                   | <65 vaccinated            | 43%                     | 37%                      | 27%                     | Unavailable <sup>d</sup> | 16%                         | Unavailable <sup>e</sup> |
|                                      | ≥65 vaccinated            | 66%                     | 65%                      | 75%                     | 73%                      | 50%                         | 53%                      |

<sup>1</sup>Population estimates for gender, age, ethnicity, income, marital status, education and settlement type are 2012/2013 estimates from the US Census Bureau<sup>54</sup>. Influenza vaccination status is from the 2013/2014 season<sup>4</sup>. <sup>a</sup>The reference income band was the closest to the US 2012/2013 median household income (\$53,046)<sup>54</sup>. <sup>b</sup>Census data only includes persons who are married with spouse present, married with spouse absent and separated (42%).

<sup>2</sup>Population estimates for gender, age, ethnicity, marital status, education and settlement type are 2011 and 2012/2013 estimates from the UK Office for National Statistics<sup>55,56</sup>. Influenza vaccination status is from the 2013/2014 season<sup>5</sup>. <sup>d</sup>Available data for <65s include children. <sup>a</sup>The reference income band was the closest to the UK 2012/2013 median household income (£22,880)<sup>57</sup>.

<sup>3</sup>Population estimates for gender, age, income, marital status, education and settlement type are 2011 and 2012/2013 estimates from France's National Institute of Statistics and Economic Studies<sup>58</sup>. Ethnicity was not collected due to country-specific data protection restrictions. Influenza vaccination status is from the 2013/2014 season<sup>59</sup>. <sup>e</sup>Available data for <65s include children. <sup>a</sup>The reference income band was the closest to France's 2012/2013 median household income (€29,330). <sup>c</sup>Census data only includes people who are legally married (49%).

Note: Differences between samples and populations were evaluated using Fisher's Exact test – we found no significant differences. Percentages may not total 100 due to rounding.

1  
2  
3 Healthcare professionals were excluded from the final samples as their decision-making  
4 processes are influenced by those they care for or regulated by healthcare authorities, thus  
5 some of their motivations and concerns may differ from those of the general population<sup>38</sup>.  
6  
7  
8 Subgroup analyses confirmed these differences (available upon request).  
9

### 10 11 **Differences between vaccinated and non-vaccinated participants**

12  
13  
14  
15 Overall, the responses of vaccinated and unvaccinated participants were significantly  
16 different ( $p < 0.05$ - $0.001$ ) and comparable across countries (Tables S2-S4 in Supplementary  
17 material). Those who had received an influenza vaccine were older, reported having an  
18 eligible health condition, had a private or public health insurance, lived with a partner  
19 (US/France), were wealthier (US/France) and more educated (US). They were also less  
20 constrained by practical barriers and more likely to report that their physician and relatives  
21 thought they should vaccinate than those who had not received a vaccine. Vaccinated  
22 participants were more concerned about the risks of influenza, less worried about the risks of  
23 the vaccine and more trusting of vaccine manufacturers and providers than unvaccinated  
24 participants. Vaccinators reported possessing a better understanding of the influenza vaccine  
25 and were more prone to let physicians make decisions about their health (US/UK) than non-  
26 vaccinators. Lastly, vaccinated participants were less likely to have had a bad vaccine or  
27 injection-related experience (UK) and more likely to have had a scary health-related  
28 experience in childhood than non-vaccinated participants.  
29  
30  
31  
32  
33  
34  
35  
36  
37  
38  
39

### 40 **Factors associated with influenza vaccination in regression analyses**

41  
42  
43  
44 When all variables were assessed concurrently, the models that best fitted the data (M6-M8)  
45 explained 73% of the variance in vaccination behaviour in the US, 80% in the UK and 64%  
46 in France (Nagelkerke  $R^2 = 0.642$ - $0.795$ ) (Tables 2-4). The first models (M1) included all the  
47 variables, thus were less parsimonious than M6-M8, yet they explained a similar share of the  
48 variance (66-80%). When using the hierarchical approach, the first-step models (M2), which  
49 included demographic, socio-economic and health variables, fitted the data poorly-to-  
50 moderately and accounted for 22% the variance in vaccination behaviour in the US, 38% in  
51 the UK and 19% in France. Practical barriers only explained 3% of the variance in the US  
52 (M3) and were not significant in the UK and France. Social influence explained 14% of the  
53  
54  
55  
56  
57  
58  
59  
60

1  
2  
3 variance in the US (M4), 21% in UK and 25% in France (M3). Influenza perceptions  
4 accounted for 30% of vaccination behaviour in the US (M5), 17% in the UK and 18% in  
5 France (M4), whereas influenza vaccine perceptions only explained 1% of this behaviour in  
6 the US (M6), 2% in the UK and 1% in France (M5). Finally, trust items explained less than  
7 1% of the variance in the US, whilst decision-making preferences and childhood experiences  
8 explained 2% of the variance in the UK and 1% in France.  
9  
10

11  
12  
13  
14  
15 When blocks were entered in reverse order, demographic, socio-economic and health  
16 variables contributed little to the variance in vaccination behaviour – 3% (US), 1% (UK) and  
17 0% (France). This is not surprising, since people's characteristics have an effect on their  
18 perceptions, thus they explain some of the same variance. This result further proves that  
19 poorly specified models – which are not evidence-based – lead to biased estimates (the  
20 detailed results of these analyses are available from the corresponding author upon request).  
21  
22  
23  
24  
25

26  
27 The final models (M6-M8) showed that being  $\geq 65$  years old (France:  $p < 0.001$ ), having an  
28 eligible health condition (US:  $p < 0.05$  & UK:  $p < 0.001$ ), having private ( $p < 0.1-0.001$ ) and  
29 public health insurance (US:  $p < 0.001$ ), being male (UK:  $p < 0.1$ ), living in a partnership (UK  
30 & France:  $p < 0.05$ ), having higher income (US:  $p < 0.1$ ) and higher education (France:  $p < 0.1$ ),  
31 and having time to vaccinate (US:  $p < 0.05$ ) were associated with vaccination uptake. They  
32 also demonstrated that those influenced by their physician's opinion ( $p < 0.001$ ), who believed  
33 they would feel more vulnerable if they catch influenza (US:  $p < 0.001$  & UK:  $p < 0.05$ ), who  
34 felt more likely to catch influenza ( $p < 0.001$ ) and less likely to become seriously ill if they had  
35 influenza (US:  $p < 0.05$ ), who felt they would spend more days in bed if they contracted it  
36 (UK:  $p < 0.05$ ), who were less likely to worry about transmitting influenza to others (UK:  
37  $p < 0.05$ ), felt less capable of avoiding influenza without a vaccine ( $p < 0.001$ ), perceived  
38 themselves as being less (US:  $p < 0.05$ ) and more (UK:  $p < 0.05$ ) knowledgeable about the  
39 vaccine, believed the vaccine was more protective (US:  $p < 0.05$ ), were less worried about its  
40 contents (France:  $p < 0.001$ ) or being inoculated with the virus (US:  $p < 0.001$  & UK:  $p < 0.05$ ),  
41 reported anticipated regret of not vaccinating ( $p < 0.05-p < 0.001$ ), exhibited higher vaccine-  
42 related self-efficacy (UK:  $p < 0.05$ ), were more prone to let physicians make decisions about  
43 their health (UK:  $p < 0.05$ ), had not had a bad experience with vaccines or injections (UK:  
44  $p < 0.05$ ) and had a scary health-related experience in childhood ( $p < 0.1-0.05$ ), were  
45 significantly likelier to report having been vaccinated during the 2013-14 winter influenza  
46 season.  
47  
48  
49  
50  
51  
52  
53  
54  
55  
56  
57  
58  
59  
60

**Table 2** Factors associated with influenza vaccination in regression analysis – US

| Variables                               | M1       |       | M2       |       | M3       |       | M4       |       | M5       |       | M6       |       | M7       |       | M8              |       |
|-----------------------------------------|----------|-------|----------|-------|----------|-------|----------|-------|----------|-------|----------|-------|----------|-------|-----------------|-------|
|                                         | OR       | SE    |          |       | OR       | SE    | OR              | SE    |
| Age                                     | 1.019    | 0.458 | 1.369    | 0.271 | 1.210    | 0.275 | 1.116    | 0.292 | 1.230    | 0.396 | 1.006    | 0.443 | 1.093    | 0.441 | 1.057           | 0.446 |
| <b>Eligible health condition</b>        | 2.528**  | 0.329 | 3.050*** | 0.204 | 3.079*** | 0.208 | 2.469*** | 0.222 | 2.145**  | 0.296 | 2.549**  | 0.320 | 2.531**  | 0.320 | <b>2.531**</b>  | 0.323 |
| <b>Private insurance</b>                | 3.463*** | 0.386 | 2.833*** | 0.242 | 2.611*** | 0.246 | 2.197**  | 0.265 | 2.394**  | 0.337 | 3.062**  | 0.367 | 3.269*** | 0.372 | <b>3.374***</b> | 0.377 |
| <b>Public insurance</b>                 | 4.507*** | 0.415 | 3.461*** | 0.258 | 3.143*** | 0.262 | 2.542*** | 0.282 | 3.163*** | 0.362 | 4.137*** | 0.391 | 4.158*** | 0.391 | <b>4.273***</b> | 0.397 |
| Gender                                  | 0.916    | 0.269 | 0.913    | 0.166 | 0.948    | 0.171 | 0.859    | 0.185 | 0.907    | 0.240 | 0.931    | 0.253 | 0.867    | 0.257 | 0.898           | 0.259 |
| Marital status                          | 0.672    | 0.294 | 1.093    | 0.185 | 1.062    | 0.188 | 1.032    | 0.204 | 0.890    | 0.266 | 0.743    | 0.281 | 0.759    | 0.283 | 0.728           | 0.286 |
| <b>Income</b>                           | 1.146*   | 0.074 | 1.198*** | 0.046 | 1.166**  | 0.049 | 1.140**  | 0.052 | 1.145**  | 0.067 | 1.143*   | 0.070 | 1.130*   | 0.070 | <b>1.145*</b>   | 0.070 |
| Education                               | 1.052    | 0.095 | 0.740    | 0.182 | 1.036    | 0.062 | 0.983    | 0.067 | 1.025    | 0.088 | 1.046    | 0.093 | 1.042    | 0.093 | 1.035           | 0.093 |
| Ethnicity                               | 0.664    | 0.287 | 1.369*   | 0.271 | 0.681**  | 0.186 | 0.665**  | 0.202 | 0.681    | 0.254 | 0.677    | 0.266 | 0.695    | 0.270 | 0.693           | 0.271 |
| Vaccine access                          | 1.277    | 0.384 |          |       |          |       |          |       |          |       |          |       |          |       |                 |       |
| <b>Time to vaccinate</b>                | 2.182**  | 0.356 |          |       | 2.804*** | 0.220 | 2.565*** | 0.239 | 2.417**  | 0.303 | 2.194**  | 0.319 | 2.535**  | 0.329 | <b>2.432**</b>  | 0.331 |
| <b>Physician's opinion</b>              | 4.361*** | 0.345 |          |       |          |       | 6.909*** | 0.211 | 2.946*** | 0.276 | 3.700*** | 0.309 | 4.260*** | 0.322 | <b>4.285***</b> | 0.321 |
| Relatives' opinion                      | 0.866    | 0.312 |          |       |          |       |          |       |          |       |          |       |          |       |                 |       |
| <b>Vulnerable to influenza</b>          | 1.335*** | 0.069 |          |       |          |       |          |       | 1.359*** | 0.056 | 1.291*** | 0.059 | 1.284*** | 0.059 | <b>1.290***</b> | 0.060 |
| Susceptible to influenza                | 1.013    | 0.056 |          |       |          |       |          |       |          |       |          |       |          |       |                 |       |
| <b>Likelihood of catching influenza</b> | 1.235*** | 0.060 |          |       |          |       |          |       | 1.238*** | 0.049 | 1.238*** | 0.055 | 1.226*** | 0.056 | <b>1.216***</b> | 0.056 |
| Severity of influenza (bed days)        | 1.121    | 0.126 |          |       |          |       |          |       |          |       |          |       |          |       |                 |       |
| <b>Severity of influenza</b>            | 0.908*   | 0.061 |          |       |          |       |          |       | 0.911*   | 0.051 | 0.902*   | 0.055 | 0.909*   | 0.055 | <b>0.903**</b>  | 0.055 |
| Fear of influenza                       | 0.973    | 0.063 |          |       |          |       |          |       |          |       |          |       |          |       |                 |       |
| Worry of transmitting influenza         | 0.932    | 0.056 |          |       |          |       |          |       |          |       |          |       |          |       |                 |       |
| <b>Perceived control over influenza</b> | 0.752*** | 0.056 |          |       |          |       |          |       | 0.741*** | 0.047 | 0.757*** | 0.052 | 0.748*** | 0.052 | <b>0.744***</b> | 0.052 |
| <b>Regret of catching influenza</b>     | 1.165**  | 0.054 |          |       |          |       |          |       | 1.112**  | 0.043 | 1.117**  | 0.049 | 1.126**  | 0.049 | <b>1.122**</b>  | 0.050 |
| <b>Perceived knowledge of vaccine</b>   | 0.406**  | 0.390 |          |       |          |       |          |       |          |       | 0.368**  | 0.361 | 0.368**  | 0.366 | <b>0.388**</b>  | 0.367 |
| <b>Effectiveness vaccine</b>            | 1.249*** | 0.066 |          |       |          |       |          |       |          |       | 1.188**  | 0.062 | 1.222**  | 0.064 | <b>1.225***</b> | 0.064 |
| <b>Vaccine transmits influenza</b>      | 0.848**  | 0.054 |          |       |          |       |          |       |          |       | 0.827*** | 0.046 | 0.835*** | 0.046 | <b>0.836***</b> | 0.047 |
| Vaccine contents are dangerous          | 0.961    | 0.055 |          |       |          |       |          |       |          |       |          |       |          |       |                 |       |

|                                        |               |              |       |       |       |        |       |                |              |                |              |
|----------------------------------------|---------------|--------------|-------|-------|-------|--------|-------|----------------|--------------|----------------|--------------|
| Vaccine is painful                     | 1.775*        | 0.329        |       |       |       | 1.712* | 0.304 | 1.585          | 0.309        | 1.558          | 0.310        |
| Vaccine-related self-efficacy          | 1.010         | 0.053        |       |       |       |        |       |                |              |                |              |
| <b>Trust in physician (scale)</b>      | <b>0.836*</b> | <b>0.096</b> |       |       |       |        |       | <b>0.796**</b> | <b>0.090</b> | <b>0.809**</b> | <b>0.091</b> |
| Trust in manufacturers                 | 0.895         | 0.081        |       |       |       |        |       |                |              |                |              |
| Trust in health authorities            | 1.013         | 0.086        |       |       |       |        |       |                |              |                |              |
| Shared decision-making doctor          | 0.953         | 0.147        |       |       |       |        |       |                |              |                |              |
| Bad experience vaccines - child        | 1.449         | 0.417        |       |       |       |        |       |                |              |                |              |
| <b>Scary health experience - child</b> | <b>2.126*</b> | <b>0.464</b> |       |       |       |        |       |                |              | <b>2.153*</b>  | <b>0.450</b> |
| Number of participants                 | 724           | 724          | 724   | 724   | 724   | 724    | 724   | 724            | 724          | 724            | 724          |
| Nagelkerke R                           | 0.734         | 0.215        | 0.252 | 0.389 | 0.686 | 0.719  | 0.725 | 0.727          |              |                |              |

OR = Odds ratio; p = p-value; SE = standard error; \*p < 0.1, \*\*p < 0.05, \*\*\*p < 0.001. The change in model fit indicated by chi-square test for each block of variables was always significant (p < 0.1).



**Table 3** Factors associated with influenza vaccination in regression analysis – UK

| Variables                               | M1       |       | M2       |       | M3       |       | M4       |       | M5       |       | M6              |       |
|-----------------------------------------|----------|-------|----------|-------|----------|-------|----------|-------|----------|-------|-----------------|-------|
|                                         | OR       | SE    | OR              | SE    |
| Age                                     | 2.044    | 0.437 | 6.204*** | 0.238 | 3.560*** | 0.277 | 2.231**  | 0.389 | 1.786    | 0.399 | 1.919           | 0.421 |
| <b>Eligible health condition</b>        | 4.088*** | 0.413 | 8.627*** | 0.226 | 4.002*** | 0.260 | 4.107*** | 0.343 | 4.215*** | 0.368 | <b>4.351***</b> | 0.393 |
| <b>Private insurance</b>                | 3.115**  | 0.472 | 1.864**  | 0.280 | 1.855*   | 0.332 | 2.858**  | 0.412 | 3.227**  | 0.429 | <b>2.871**</b>  | 0.451 |
| <b>Gender</b>                           | 0.629    | 0.321 | 0.611**  | 0.188 | 0.677*   | 0.222 | 0.508**  | 0.286 | 0.475**  | 0.298 | <b>0.580*</b>   | 0.312 |
| <b>Marital status</b>                   | 2.018**  | 0.337 | 1.993*** | 0.207 | 1.795**  | 0.244 | 1.897**  | 0.303 | 1.908**  | 0.314 | <b>1.897**</b>  | 0.323 |
| Income                                  | 0.918    | 0.105 | 0.946    | 0.062 | 0.967    | 0.072 | 0.943    | 0.089 | 0.905    | 0.096 | 0.906           | 0.100 |
| Education                               | 0.962    | 0.103 | 0.979    | 0.061 | 0.966    | 0.072 | 0.981    | 0.089 | 0.947    | 0.094 | 0.976           | 0.098 |
| Ethnicity                               | 1.768    | 0.478 | 0.877    | 0.305 | 1.549    | 0.361 | 1.953    | 0.423 | 1.695    | 0.452 | 1.757           | 0.464 |
| Vaccine access                          | 1.380    | 0.457 |          |       |          |       |          |       |          |       |                 |       |
| Time to vaccinate                       | 1.295    | 0.427 |          |       |          |       |          |       |          |       |                 |       |
| <b>Physician's opinion</b>              | 3.447*** | 0.371 |          |       | 7.751*** | 0.247 | 4.296*** | 0.331 | 2.962**  | 0.347 | <b>3.097**</b>  | 0.359 |
| <b>Relatives' opinion</b>               | 2.205**  | 0.355 |          |       | 3.061*** | 0.245 | 2.193**  | 0.316 | 2.195**  | 0.333 | <b>2.103**</b>  | 0.344 |
| <b>Vulnerable to influenza</b>          | 1.183**  | 0.081 |          |       |          |       | 1.268*** | 0.071 | 1.264**  | 0.075 | <b>1.233**</b>  | 0.076 |
| <b>Susceptible to influenza</b>         | 0.889*   | 0.066 |          |       |          |       | 0.863**  | 0.058 | 0.904*   | 0.061 | <b>0.882**</b>  | 0.063 |
| <b>Likelihood of catching influenza</b> | 1.355*** | 0.078 |          |       |          |       | 1.214**  | 0.063 | 1.298*** | 0.070 | <b>1.311***</b> | 0.073 |
| <b>Severity of influenza (bed days)</b> | 1.317**  | 0.130 |          |       |          |       | 1.295**  | 0.116 | 1.277**  | 0.119 | <b>1.314**</b>  | 0.121 |
| Severity of influenza                   | 1.062    | 0.073 |          |       |          |       |          |       |          |       |                 |       |
| Fear of influenza                       | 0.970    | 0.068 |          |       |          |       |          |       |          |       |                 |       |
| <b>Worry of transmitting influenza</b>  | 0.872**  | 0.066 |          |       |          |       | 0.881**  | 0.059 | 0.865**  | 0.060 | <b>0.870**</b>  | 0.062 |
| <b>Perceived control over influenza</b> | 0.832**  | 0.064 |          |       |          |       | 0.787*** | 0.056 | 0.812*** | 0.058 | <b>0.811***</b> | 0.060 |
| <b>Regret of catching influenza</b>     | 1.324*** | 0.064 |          |       |          |       | 1.348*** | 0.057 | 1.301*** | 0.057 | <b>1.326***</b> | 0.060 |
| <b>Perceived knowledge of vaccine</b>   | 2.098*   | 0.410 |          |       |          |       |          |       | 2.123*   | 0.383 | <b>2.100*</b>   | 0.392 |
| Effectiveness of vaccine                | 1.112    | 0.077 |          |       |          |       |          |       |          |       |                 |       |
| <b>Vaccine transmits influenza</b>      | 0.901    | 0.066 |          |       |          |       |          |       | 0.873**  | 0.051 | <b>0.865**</b>  | 0.055 |
| Vaccine contents are dangerous          | 0.896    | 0.080 |          |       |          |       |          |       |          |       |                 |       |
| Vaccine is painful                      | 1.732    | 0.412 |          |       |          |       |          |       |          |       |                 |       |
| <b>Vaccine-related self-efficacy</b>    | 1.164*   | 0.082 |          |       |          |       |          |       | 1.203**  | 0.072 | <b>1.208**</b>  | 0.076 |



|                                        |         |       |       |       |       |                |       |
|----------------------------------------|---------|-------|-------|-------|-------|----------------|-------|
| Trust in physician (scale)             | 0.899   | 0.107 |       |       |       |                |       |
| Trust in manufacturers                 | 0.868   | 0.088 |       |       |       |                |       |
| Trust in health authorities            | 0.986   | 0.098 |       |       |       |                |       |
| <b>Shared decision-making doctor</b>   | 0.642** | 0.165 |       |       |       | <b>0.675**</b> | 0.158 |
| <b>Bad experience vaccines - child</b> | 0.252** | 0.557 |       |       |       | <b>0.267**</b> | 0.526 |
| <b>Scary health experience - child</b> | 3.434** | 0.496 |       |       |       | <b>3.254**</b> | 0.460 |
| Number of participants                 | 728     | 728   | 728   | 728   | 728   | 728            | 728   |
| Nagelkerke R                           | 0.798   | 0.378 | 0.589 | 0.759 | 0.777 | 0.795          |       |

OR = Odds ratio; p = p-value; SE = standard error; \*p < 0.1, \*\*p < 0.05, \*\*\*p < 0.001. The change in model fit indicated by chi-square test for each block of variables was always significant (p < 0.1).

**Table 4** Factors associated with influenza vaccination in regression analysis – France

| Variables                               | M1       |       | M2       |       | M3        |       | M4       |       | M5       |       | M6              |       |
|-----------------------------------------|----------|-------|----------|-------|-----------|-------|----------|-------|----------|-------|-----------------|-------|
|                                         | OR       | SE    | OR       | SE    | OR        | SE    | OR       | SE    | OR       | SE    | OR              | SE    |
| <b>Age</b>                              | 2.772**  | 0.342 | 4.544*** | 0.208 | 2.916***  | 0.244 | 3.264*** | 0.291 | 3.109*** | 0.296 | <b>2.832***</b> | 0.299 |
| Eligible health condition               | 1.196    | 0.332 | 2.142*** | 0.212 | 1.565*    | 0.248 | 1.174    | 0.295 | 1.214    | 0.300 | 1.095           | 0.307 |
| <b>Private insurance</b>                | 2.423*   | 0.493 | 1.525    | 0.353 | 1.524     | 0.396 | 2.179*   | 0.486 | 2.150*   | 0.495 | <b>2.258*</b>   | 0.495 |
| Gender                                  | 1.281    | 0.292 | 0.766    | 0.196 | 0.952     | 0.227 | 1.081    | 0.264 | 1.148    | 0.269 | 1.177           | 0.274 |
| <b>Marital status</b>                   | 1.935**  | 0.316 | 1.236    | 0.216 | 1.254*    | 0.246 | 1.855**  | 0.291 | 1.892**  | 0.295 | <b>1.927**</b>  | 0.299 |
| Income                                  | 1.106    | 0.121 | 1.148    | 0.085 | 1.163     | 0.097 | 1.056    | 0.111 | 1.055    | 0.112 | 1.064           | 0.114 |
| <b>Education</b>                        | 1.151    | 0.092 | 1.093    | 0.062 | 1.102     | 0.072 | 1.223**  | 0.086 | 1.200**  | 0.087 | <b>1.180*</b>   | 0.088 |
| Vaccine access                          | 0.501*   | 0.387 |          |       |           |       |          |       |          |       |                 |       |
| Time to vaccinate                       | 0.862    | 0.401 |          |       |           |       |          |       |          |       |                 |       |
| <b>Physician's opinion</b>              | 7.464*** | 0.352 |          |       | 13.848*** | 0.237 | 7.258*** | 0.274 | 6.773*** | 0.278 | <b>6.949***</b> | 0.285 |
| Relatives' opinion                      | 0.806    | 0.347 |          |       |           |       |          |       |          |       |                 |       |
| Vulnerable to influenza                 | 1.100    | 0.065 |          |       |           |       |          |       |          |       |                 |       |
| Susceptible to influenza                | 0.922    | 0.064 |          |       |           |       |          |       |          |       |                 |       |
| <b>Likelihood of catching influenza</b> | 1.231**  | 0.069 |          |       |           |       | 1.232*** | 0.053 | 1.257*** | 0.055 | <b>1.250***</b> | 0.056 |
| Severity of influenza (bed days)        | 1.077    | 0.137 |          |       |           |       |          |       |          |       |                 |       |
| Severity of influenza                   | 0.999    | 0.067 |          |       |           |       |          |       |          |       |                 |       |
| Fear of influenza                       | 0.986    | 0.058 |          |       |           |       |          |       |          |       |                 |       |
| Worry of transmitting influenza         | 1.077    | 0.064 |          |       |           |       |          |       |          |       |                 |       |
| <b>Perceived control over influenza</b> | 0.846**  | 0.054 |          |       |           |       | 0.815*** | 0.048 | 0.848*** | 0.050 | <b>0.841***</b> | 0.051 |
| <b>Regret of catching influenza</b>     | 1.319*** | 0.063 |          |       |           |       | 1.385*** | 0.050 | 1.359*** | 0.052 | <b>1.368***</b> | 0.053 |
| Perceived knowledge of vaccine          | 1.319    | 0.356 |          |       |           |       |          |       |          |       |                 |       |
| Effectiveness of vaccine                | 1.067    | 0.076 |          |       |           |       |          |       |          |       |                 |       |
| Vaccine transmits influenza             | 0.871**  | 0.058 |          |       |           |       |          |       |          |       |                 |       |
| <b>Vaccine contents are dangerous</b>   | 0.869    | 0.465 |          |       |           |       |          |       | 0.874*** | 0.045 | <b>0.860***</b> | 0.046 |
| Vaccine is painful                      | 0.958    | 0.063 |          |       |           |       |          |       |          |       |                 |       |
| Vaccine-related self-efficacy           | 1.006    | 0.065 |          |       |           |       |          |       |          |       |                 |       |
| Trust in physician (scale)              | 1.005    | 0.105 |          |       |           |       |          |       |          |       |                 |       |

|                                        |                 |              |       |       |       |                |       |
|----------------------------------------|-----------------|--------------|-------|-------|-------|----------------|-------|
| Trust in manufacturers                 | 0.955           | 0.086        |       |       |       |                |       |
| Trust in health authorities            | 0.900           | 0.089        |       |       |       |                |       |
| Shared decision-making doctor          | 0.997           | 0.164        |       |       |       |                |       |
| Bad experience vaccines - child        | 0.854           | 0.448        |       |       |       |                |       |
| <b>Scary health experience - child</b> | <b>4.139***</b> | <b>0.447</b> |       |       |       | <b>3.608**</b> | 0.426 |
| Number of participants                 | 699             | 795          | 795   | 795   | 795   | 795            | 795   |
| Nagelkerke R                           | 0.659           | 0.189        | 0.444 | 0.619 | 0.630 | 0.642          |       |

OR = Odds ratio; p = p-value; SE = standard error; \*p < 0.1, \*\*p < 0.05, \*\*\*p < 0.001. The change in model fit indicated by chi-square test for each block of variables was always significant (p < 0.1).

1  
2  
3 Robustness checks showed that variables which were significant in M6-M8, were  
4 consistently so across most 11-22 specifications, with some exceptions. In the US, “vaccine is  
5 painful” became non-significant when non-significant influenza perceptions were removed.  
6 This suggests that the latter had a suppressor effect on the former, i.e. their inclusion  
7 strengthened the effect of the variable in question<sup>39</sup>. In the UK, gender became significant  
8 when non-significant vaccine perceptions were removed, which indicates that the latter were  
9 a confounders of the former<sup>40</sup>. In France, “trust in manufacturers” was a confounder of  
10 education – the latter became significant in the absence of the former – and “trust in  
11 physician” was a suppressor of “vaccine access” – the latter became non-significant when the  
12 former was excluded<sup>39,40</sup>. Detailed robustness checks are not presented here for brevity, but  
13 are available from the corresponding author upon request.  
14  
15  
16  
17  
18  
19  
20  
21  
22

23 Collinearity diagnostics showed that all variables had VIF values below 5, indicating there is  
24 no cause for concern<sup>41</sup>. Standardised residuals were also examined to identify outliers. Less  
25 than 5% of the cases had standardised residuals above 2 and no more than 1% had absolute  
26 values higher than 3, thus there was no need to eliminate or transform cases<sup>42</sup>. Cook’s  
27 distance statistics were evaluated to identify cases exerting excessive influence on the model.  
28 No values were higher than 1, which shows that no case had to be excluded on that basis<sup>43</sup>.  
29  
30  
31  
32  
33

## 34 **DISCUSSION**

35  
36  
37 This study aimed to identify policy amenable factors associated with influenza vaccination  
38 uptake among adults in three high-income countries and to quantify their impact. Our results  
39 support previous findings and add new insights.  
40  
41  
42  
43

44 The final models robustly explained 64-80% of the variance in vaccination behaviour and  
45 although some predictors were country-specific, we found important commonalities (Table  
46 5). To the best of our knowledge, ours is the first study to demonstrate that socio-  
47 psychological variables consistently explain most of the variance in influenza vaccination  
48 behaviour, over and above demographic, socio-economic and health variables (49% vs. 22%  
49 in the US, 42% vs. 38% in the UK and 45% vs. 19% in France). Our findings also show that  
50 the most important policy amenable factors were social influence, particularly physicians’  
51 (US = 14%, UK = 21% and France = 25% of the variance) and perceptions about influenza  
52 (US = 30%, UK = 17% and France = 18% of the variance), communication efforts should,  
53  
54  
55  
56  
57  
58  
59  
60

**Table 5.** Survey items associated with influenza vaccination

| Item                                                                                                                          | US | UK | France |
|-------------------------------------------------------------------------------------------------------------------------------|----|----|--------|
| What is your date of birth?                                                                                                   |    |    | ✓      |
| Have you ever been diagnosed with any of the following (eligible) conditions?                                                 | ✓  | ✓  |        |
| Do you have a private health insurance?                                                                                       | ✓  | ✓  | ✓      |
| Do you have public health insurance (e.g. Medicare)?                                                                          | ✓  |    |        |
| What is your gender?                                                                                                          |    | ✓  |        |
| Which of the following options best describes your current situation (marital status)?                                        |    | ✓  | ✓      |
| What is your combined annual household income?                                                                                | ✓  |    |        |
| What is the highest level of education you have completed?                                                                    |    |    | ✓      |
| Which of the following statements apply to you?                                                                               |    |    |        |
| I can make time to get the flu vaccine                                                                                        | ✓  |    |        |
| My physician thinks I should get a flu vaccine                                                                                | ✓  | ✓  | ✓      |
| My relatives or close friends think I should get a flu vaccine                                                                |    | ✓  |        |
| With no flu vaccine, I would feel very vulnerable to the flu                                                                  | ✓  | ✓  |        |
| If I got the flu, I would feel sicker than other people my age                                                                |    | ✓  |        |
| Without a flu vaccine, I am sure I would get the flu this winter                                                              | ✓  | ✓  | ✓      |
| I believe that if I got the flu I would have to stay in bed for...                                                            |    | ✓  |        |
| The flu could make me severely ill                                                                                            | ✓  |    |        |
| If I don't get the flu vaccine and I get the flu, passing the flu to other people would worry me because it would be my fault |    | ✓  |        |
| I am confident I can avoid getting the flu, even without the flu vaccine                                                      | ✓  | ✓  | ✓      |
| If I don't get a flu vaccine and end up getting the flu this winter, I would regret not getting the vaccine                   | ✓  | ✓  | ✓      |
| I feel I know enough about the flu vaccine to make an informed decision about whether to get vaccinated or not                | ✓  | ✓  |        |
| If I get a flu vaccine, I will be protected against the flu                                                                   | ✓  |    |        |
| The flu vaccine could give me the flu                                                                                         | ✓  | ✓  |        |
| I am worried that some of the contents of the flu vaccine may be dangerous for me                                             |    |    | ✓      |
| I am confident I can get a flu vaccine if I want one                                                                          |    | ✓  |        |
| Which of the following statements best represents how much you trust your physician?                                          | ✓  |    |        |
| How actively do you participate with your physician in making decisions about health, generally?                              |    | ✓  |        |
| Which of these statements best represents your past experiences as a child?                                                   |    |    |        |
| I had a bad experience with vaccines or injections                                                                            |    | ✓  |        |
| I had a scary health-related experience                                                                                       | ✓  | ✓  | ✓      |

See the full list of included items and response categories in Table S1 in Supplementary material. Highlighted items were significant in two (light grey) or three (dark grey) countries.

1  
2  
3 therefore, focus on these factors. Surprisingly, perceptions about the influenza vaccine  
4 explained a very small proportion of vaccination behaviour across the three countries.  
5  
6

7  
8 Specifically, and in line with previous evidence, we found that age, health status, health  
9 insurance, income, gender, marital status and education were associated with vaccination<sup>9,33</sup>.  
10 Differences between countries are likely influenced by their healthcare systems and  
11 immunisation policies. For example, having an eligible health condition was more important  
12 than age in the US and the UK, whereas the opposite occurred in France. One plausible reason  
13 is that a controversy about the effectiveness and safety of the A(H1N1)pdm09 vaccine in  
14 2009/2010, which has had a lasting negative impact on seasonal influenza vaccination rates in  
15 France, may have dissuaded some populations, such as younger people with eligible health  
16 conditions, more than others<sup>33,44</sup>. Private and public health insurance, and income were  
17 associated with vaccination in the US, a country with a largely privatised healthcare system.  
18 Although the UK and France have healthcare systems which are affordable for most or free at  
19 the point of delivery, the influenza vaccine is only free of charge for people with eligible  
20 health conditions, which may explain the association between health insurance and  
21 vaccination in both countries. Marital status was also correlated with vaccination in the UK  
22 and France. Higher vaccination rates among participants living with a partner may be  
23 explained by people's tendency to protect their significant other or encouragement from  
24 partners to get vaccinated, yet more evidence is needed to substantiate this assertion. Finally,  
25 being male and more educated were positively associated with vaccination in the UK and  
26 France, respectively. Yet, both characteristics were not robustly correlated with vaccination  
27 across all specifications, thus these findings should be interpreted with caution.  
28  
29  
30  
31  
32  
33  
34  
35  
36  
37  
38  
39  
40  
41  
42

43 Our results also show that practical barriers were not important, except for time in the US.  
44 This finding suggests that a culture of long working hours and short holidays may indeed  
45 have a negative effect on vaccination uptake.  
46  
47  
48

49 Consistent with previous research, we found that physicians' opinion (and relatives' opinion  
50 in the UK), perceived vulnerability to and likelihood of influenza (and severity of influenza  
51 measured in number of bed-days in the UK), perceived vaccine effectiveness (only in the  
52 US), the perception that the vaccine transmits influenza (in the US and UK) or that its  
53 contents are dangerous (France), and perceived vaccine-related self-efficacy (UK) were  
54 associated with vaccine uptake<sup>9-12,24</sup>. As previously reported in the literature<sup>11</sup>, we also found  
55  
56  
57  
58  
59  
60

1  
2  
3 a small negative association between the perceived severity of influenza and vaccination in  
4 the US, and no association in the UK and France. A possible explanation is that people who  
5 believe that influenza could make them severely ill, may also be concerned about the vaccine  
6 flu-like symptoms, thus omission bias may induce them to refrain from vaccinating<sup>30,45</sup>.

7  
8  
9 Alternatively, the knowledge that influenza could be serious may not necessarily translate  
10 into a feeling of personal threat, particularly among younger individuals. A similar result was  
11 the lack of or negative of association between perceived susceptibility to influenza and  
12 vaccination in the US and France, and the UK, respectively. These findings indicate that  
13 measuring perceived influenza severity as degree of seriousness (“the flu could make me  
14 severely ill”) and perceived susceptibility to influenza as individuals’ constitutional  
15 vulnerability in relation to that of others (“If I got the flu, I would feel sicker than other  
16 people my age”), does not improve our understanding of vaccination behaviour, as previously  
17 suggested<sup>11</sup>.

18  
19  
20 Interestingly, perceived vaccine knowledge (to make informed decisions) was negatively  
21 correlated with vaccination in the US and positively correlated in the UK. Researchers have  
22 long advocated for strategies to increase knowledge about vaccines<sup>10</sup>, yet these results  
23 suggest that a cognitive approach may not always be effective, particularly when the target  
24 population (e.g. US non-vaccinators) perceive themselves as being knowledgeable, and hence  
25 are less likely to seek or be receptive to further information.

26  
27  
28 Factors which are less explored in the literature were also robustly correlated with  
29 vaccination. Perceived control over influenza and regret of catching it (if unvaccinated) were  
30 significantly associated with vaccination behaviour across the three countries. Worry of  
31 infecting other people (if unvaccinated) was only linked to vaccination in the UK, but the  
32 direction of the association was unexpected: unvaccinated participants worried more than  
33 vaccinated participants of infecting other people if they were to remain unvaccinated.  
34 Although this question was hypothetical, it is plausible that unvaccinated participants felt  
35 worried about infecting others because of their actual vaccination status, whereas vaccinated  
36 participants did not, either because they felt protected by the vaccine or they do not generally  
37 worry about infecting others. In any case, this result does not support the notion that altruism  
38 motivates people to vaccinate<sup>26</sup>.

1  
2  
3 Our results also show that trust in key vaccination stakeholders does not play a significant  
4 role in influenza vaccination decisions in these countries. In fact, we found that US  
5 vaccinators were less trusting of their physician than those who did not vaccinate. This  
6 finding conflicts with the premise that all vaccination decisions are a combination of  
7 individuals' perceptions of the information they receive and their trust in those who  
8 manufacture, legislate and deliver vaccines<sup>25</sup>.  
9  
10

11  
12  
13  
14 A striking finding from a qualitative study<sup>30</sup> held true when tested quantitatively. UK  
15 participants who had a bad experience with needles in childhood were less likely to vaccinate  
16 later in life, consistent with evidence showing that traumatic experiences can linger through  
17 to adulthood and significantly influence health decisions<sup>46</sup>. This was further supported by the  
18 increased likelihood of vaccinating exhibited by those who reported a scary health-related  
19 experience in childhood across the three countries, possibly due to a lasting perception of  
20 vulnerability that resulted in enhanced preventive behaviours in adulthood. Future research  
21 could unpack this synergistic effect using qualitative approaches. To our knowledge, this is  
22 the first quantitative study linking adult vaccination behaviour with childhood experiences.  
23  
24  
25  
26  
27  
28  
29  
30

31 Finally, we found that UK vaccinators were more likely to let their doctors make decisions  
32 about their health. This finding resonates with findings from Opel and colleagues which  
33 showed that parents were more likely to resist advice if the doctor used a participatory (e.g.  
34 "What do you want to do about shots?") rather than a presumptive initiation approach (e.g.  
35 "Well, we have to do some shots")<sup>47</sup>. Researchers could test the replicability of Opel's study  
36 on adult vaccination and further explore the role of health decision-making preferences on  
37 doctor-patient communication about vaccines.  
38  
39  
40  
41  
42  
43  
44

### 45 **Policy implications**

46  
47  
48 This study offers evidence that can inform policy and practice. Socio-psychological factors  
49 associated with influenza vaccination can be used to track vaccination sentiment and forecast  
50 uptake. These factors are currently not consistently monitored and rarely used as a basis for  
51 effective service delivery and communication strategies. If we are to improve or at least  
52 sustain current immunisation rates, we must start actively listening to the public by including  
53 these aspects into national immunisation surveys. An important challenge for policymakers is  
54 prioritising what to monitor and to what extent. As a first step, influenza vaccination  
55  
56  
57  
58  
59  
60



1  
2  
3 surveillance systems should include the explanatory variables reported here, particularly  
4 those accounting for a significant proportion of the variance in vaccination behaviour (i.e.  
5 social influence and influenza perceptions), and make additions or adjustments over time.  
6  
7

8  
9  
10 More importantly, our findings suggest that socio-psychological factors could provide a  
11 valuable opportunity to develop and evaluate targeted interventions to improve vaccination  
12 coverage. For instance, the influence of physicians' opinions on vaccination, over and above  
13 people's trust in immunisation stakeholders (including physicians themselves), indicates that  
14 improving communications at the practice level should be prioritised. One possible  
15 intervention is to reach under-vaccinated groups (e.g. younger eligible individuals) via  
16 consultations and vaccination reminders, a strategy that has been successful in older  
17 populations<sup>48</sup>. A complementary initiative is to link influenza vaccination rates to pay-for-  
18 performance systems, such as the UK Quality and Outcomes Framework (QoF), which could  
19 incentivise primary care practices to employ more effective approaches to reach out to  
20 eligible unvaccinated patients. In the US, programs to introduce the influenza vaccine in the  
21 work place may encourage those with limited time to protect themselves.  
22  
23  
24  
25  
26  
27  
28  
29  
30

31 Efforts could also focus on addressing the gap between perceived and real risks of influenza.  
32 This could be achieved by moving away from generic messages about the threat of influenza  
33 (e.g. "influenza is serious") toward tailored messages which take into consideration the needs  
34 and characteristics of different at-risk populations. For instance, influenza-related  
35 complications in young diabetics may differ from those experienced by elderly people.  
36 Specific messages may, therefore, allow individuals and their families to better identify risks  
37 relevant to their condition and, in turn, compel them to vaccinate.  
38  
39  
40  
41  
42  
43  
44

45 Similarly, effective communications as part of the consultation aimed at assuaging concerns  
46 around vaccines could take into account decision-making preferences and individual past  
47 experiences, particularly in the UK. For instance, communication efforts are likely to be  
48 better spent on those who prefer to make decisions about their health independently than those  
49 who are more prone to delegate health decisions to their physician. Given the lasting effect of  
50 some traumatic childhood experiences, interventions and new products aimed at making all  
51 childhood encounters with injections as easy as possible may be a good investment in the  
52 success of vaccination programs in the future.  
53  
54  
55  
56  
57  
58  
59  
60

1  
2  
3 However, in a context of constrained resources, physicians and nursing staff have limited  
4 time and resources to improve vaccination services and communications. Hence, increased  
5 investment in the provision of training, adequate communication materials and decision aids  
6 to enhance patient-doctor communication is urgently needed and much deserved.  
7  
8

9  
10  
11 Messages delivered in primary care settings could also be complemented with evidence-  
12 based mass-communications. For example, a national campaign could combine messages  
13 about the risks of influenza (e.g. likelihood of catching it and feelings of vulnerability and  
14 regret for not vaccinating) with messages about the limited protectiveness of avoidance  
15 strategies (e.g. taking vitamins or evading crowds), and provide – rather than avoid – easy-to-  
16 understand and accurate information about vaccine safety (e.g. communicating more  
17 effectively the difference between vaccine-induced symptoms and actual influenza  
18 symptoms) and effectiveness, particularly in the US. When possible, mass communications  
19 should also be tailored to specific at-risk populations.  
20  
21  
22  
23  
24  
25  
26  
27

### 28 **Limitations**

29  
30  
31 This study has several limitations, some of which may affect the generalisability of our  
32 findings. Although the use of nonprobability online panels has become increasingly  
33 common<sup>49,50</sup>, response rates are generally low<sup>51</sup>. This is because online panel members  
34 become desensitised to survey e-mail invitations from the online panel provider<sup>51,52</sup>.  
35  
36 Additionally, in nonprobability-based samples the relationship between the sample and the  
37 panel population is unknown, so it is not possible to estimate how representative the sample  
38 is of the population as a whole. Thus, our research may have suffered from respondent-  
39 related biases; for example, people for whom vaccination issues are particularly salient may  
40 have been more prone to participate<sup>52</sup>. Further, since we sought to attain nationally  
41 representative samples, they may not have been adequately powered to detect sub-group  
42 differences (e.g. whites and non-whites).  
43  
44  
45  
46  
47  
48  
49  
50

51 Another possible drawback is that lengthy instruments may fatigue participants and affect the  
52 quality of the data. Reassuringly, pilot results indicated that participants did not feel the  
53 survey was long or difficult to complete. A related limitation is the dichotomisation of some  
54 of the continuous variables, which could have resulted in loss of information. It was,  
55 however, deemed acceptable in our analysis due to the number of missing responses.  
56  
57  
58  
59  
60

1  
2  
3  
4  
5 An additional limitation is the use of a subjective outcome measure. Although data from  
6 medical records may be preferable, previous research comparing the accuracy of the latter to  
7 self-reported influenza vaccination has shown these can coincide in up to 90% of the cases<sup>53</sup>.  
8  
9 Further, since some people vaccinate at work or alternative facilities such as pharmacies, it  
10 remains unclear whether medical records are more accurate than self-reports.  
11  
12

13  
14  
15 Lastly, and consistent with other retrospective cross-sectional studies, causation cannot be  
16 inferred, thus some of the assessed perceptions may have been generated or reinforced by  
17 prior vaccination. Future research could test whether the identified explanatory variables  
18 prospectively predict objective outcome measures (i.e. actual vaccination uptake) among  
19 first-time vaccinators.  
20  
21  
22

## 23 24 25 **CONCLUSIONS**

26  
27  
28 This study identifies policy amenable factors associated with influenza vaccination and  
29 presents a set of robust explanatory variables that aims to attain a comprehensive and more  
30 accurate understanding of the constellation of factors underpinning vaccination behaviour.  
31 Our findings can prove useful for countries looking to improve vaccination rates by  
32 developing more opportune and effective communication strategies and implementing  
33 evidence-based interventions. Our results highlight the importance of routinely monitoring  
34 vaccination sentiment and using these data to inform immunisation policy.  
35  
36  
37  
38  
39  
40  
41  
42  
43  
44  
45  
46  
47  
48  
49  
50  
51  
52  
53  
54  
55  
56  
57  
58  
59  
60

## COMPETING INTERESTS AND FUNDING

This work was supported by Sanofi Pasteur through an unrestricted research grant (P40006\_WSSS) and the National Institute for Health Research Imperial Patient Safety Translational Research Centre (PSTRC) (RDPSC 79560), UK. Sevdalis' research is funded by the National Institute for Health Research (NIHR) via the 'Collaboration for Leadership in Applied Health Research and Care South London' at King's College Hospital NHS Foundation Trust, London, UK. Sevdalis also delivers behavioral and safety interventions and training to hospitals internationally on a consultancy basis through London Safety and Training Solutions Ltd. Wheelock and Sevdalis currently have a consultancy agreement as paid scientific advisors in the design of a shingles vaccine survey by Sanofi MSD. Thomson is employed by Sanofi Pasteur. Miraldo and Vincent have nothing to disclose. The views expressed are those of the authors and not necessarily those of the National Health Service, the NIHR, the Department of Health or Sanofi Pasteur.

## ACKNOWLEDGEMENTS

The authors would like to thank the funders of this study and all those who agreed to take part in our research. We are also grateful to Bruno Rigole (Sanofi Pasteur), Rebecca da Cunha, Brian Larkin, Sofia Lombera and Natasha Phillips (Double Helix), and Nicole Huyghe and Kerry O'Neill (solutions-2) for their valuable advice and management support throughout this study.

## AUTHOR CONTRIBUTIONS

AW, MM, AT, CV and NS contributed to the design of the study, the interpretation of the results and write-up of the manuscript. AW led the analysis and drafting of the manuscript. MM provided statistical advice.

## DATA SHARING STATEMENT

No additional data are available.

## REFERENCES

1. GBD 2013 Mortality and Causes of Death Collaborators. Global, regional, and national age–sex specific all-cause and cause-specific mortality for 240 causes of death, 1990–2013: a systematic analysis for the Global Burden of Disease Study 2013. *Lancet* 2013;385(9963):117-171.
2. CDC. Estimates of deaths associated with seasonal influenza - United States, 1976-2007. *MMWR* 2010;59(33):1057.
3. ECDC. Factsheet for the general public.  
[http://ecdc.europa.eu/en/healthtopics/seasonal\\_influenza/basic\\_facts/Pages/factsheet\\_general\\_public.aspx](http://ecdc.europa.eu/en/healthtopics/seasonal_influenza/basic_facts/Pages/factsheet_general_public.aspx). Accessed March 30, 2015.
4. CDC. Seasonal influenza vaccination trends.  
<http://www.cdc.gov/flu/fluview/trends.htm>. Accessed December 1, 2014.
5. PHE. Influenza immunisation programme for England: GP patient groups data collection survey season 2013 to 2014.  
[https://www.gov.uk/government/uploads/system/uploads/attachment\\_data/file/319694/29024\\_94\\_FluVaccineUptake\\_GPPatients2013-14\\_acc.pdf](https://www.gov.uk/government/uploads/system/uploads/attachment_data/file/319694/29024_94_FluVaccineUptake_GPPatients2013-14_acc.pdf). Accessed December 1, 2014.
6. 56th World Health Assembly. *Prevention and Control of Influenza Pandemics and Annual Epidemics*. Geneva, Switzerland; 2003.
7. ONS. Excess Winter Mortality in England and Wales, 2014/15 (Provisional) and 2013/14 (Final).  
<http://webarchive.nationalarchives.gov.uk/20160105160709/http://www.ons.gov.uk/ons/rel/s-ubnational-health2/excess-winter-mortality-in-england-and-wales/2014-15--provisional--and-2013-14--final-/index.html>. Accessed May 30, 2016.
8. PHE. Influenza immunisation programme for England: GP patient groups data collection survey season 2015 to 2016.  
[https://www.gov.uk/government/uploads/system/uploads/attachment\\_data/file/526033/Seasonal\\_flu\\_GP\\_patient\\_groups\\_annual\\_report\\_2015\\_2016.pdf](https://www.gov.uk/government/uploads/system/uploads/attachment_data/file/526033/Seasonal_flu_GP_patient_groups_annual_report_2015_2016.pdf). Accessed May 30, 2016.
9. Chapman GB, Coups EJ. Predictors of influenza vaccine acceptance among healthy adults. *Prev Med* 1999;29(4):249-262.
10. Kohlhammer Y, Schnoor M, Schwartz M, Raspe H, Schäfer T. Determinants of influenza and pneumococcal vaccination in elderly people: a systematic review. *Public Health* 2007;121(10):742-751.

- 1  
2  
3 11. Brewer NT, Chapman GB, Gibbons FX, Gerrard M, McCaul KD, Weinstein ND.  
4 Meta-analysis of the relationship between risk perception and health behavior: the example of  
5 vaccination. *Health Psychol* 2007;26(2):136.  
6  
7
- 8 12. Wheelock A, Thomson A, Sevdalis N. Social and psychological factors underlying  
9 adult vaccination behavior: lessons from seasonal influenza vaccination in the US and the  
10 UK. *Expert Rev Vaccines* 2013:1-9.  
11
- 12 13. CDC. Influenza vaccination and self-reported reasons for not receiving influenza  
13 vaccination among Medicare beneficiaries aged > or =65 years--United States, 1991-2002.  
14 *MMWR* 2004;53(43):1012-5.  
15  
16
- 17 14. Tversky A, Kahneman D. Availability: A heuristic for judging frequency and  
18 probability. *Cognitive Psychol* 1973;5(2):207-232.  
19
- 20 15. Weinstein ND. Misleading tests of health behavior theories. *Ann Behav Med*  
21 2007;33(1):1-10.  
22
- 23 16. NVAC. NVAC Vaccine Hesitancy Working Group Charge.  
24 <http://www.hhs.gov/nvpo/nvac/subgroups/nvac-vaccine-hesitancy-wgcharge.html>. Accessed  
25 February 28, 2014.  
26  
27
- 28 17. Larson HJ, Jarrett C, Schulz WS, Chaudhuri M, Zhou Y, Dube E, et al. Measuring  
29 vaccine hesitancy: The development of a survey tool. *Vaccine* (0).  
30  
31
- 32 18. Weinstein ND, Kwitel A, McCaul KD, Magnan RE, Gerrard M, Gibbons FX. Risk  
33 perceptions: Assessment and relationship to influenza vaccination. *Health Psychol*  
34 2007;26(2):146-151.  
35  
36
- 37 19. Liao Q, Wong WS and Fielding R. Comparison of Different Risk Perception  
38 Measures in Predicting Seasonal Influenza Vaccination among Healthy Chinese Adults in  
39 Hong Kong: A Prospective Longitudinal Study. *PloS one* 2013;8(7):e68019.  
40  
41
- 42 20. Nexøe J, Kragstrup J and Søgaaard J. Decision on influenza vaccination among the  
43 elderly: a questionnaire study based on the Health Belief Model and the Multidimensional  
44 Locus of Control Theory. *Scand J Prim Health* 1999;17(2):105-110.  
45  
46
- 47 21. Callegaro M, Baker RP, Bethlehem J, Göritz AS, Krosnick JA, Lavrakas PJ. *Online*  
48 *Panel Research: A Data Quality Perspective*. John Wiley & Sons; 2014.  
49  
50
- 51 22. Rosenstock IM. Why people use health services. *Milbank Q* 1966:94-127.  
52
- 53 23. Rogers RW. A protection motivation theory of fear appeals and attitude change.  
54 *Journal Psychol* 1975;91(1):93-114.  
55  
56  
57  
58  
59  
60

- 1  
2  
3 24. Liao Q, Cowling BJ, Lam WWT, Fielding R. Factors affecting intention to receive  
4 and self-reported receipt of 2009 pandemic (H1N1) vaccine in Hong Kong: a longitudinal  
5 study. *PLoS one* 2011;6(3):e17713.  
6  
7  
8 25. Larson HJ, Cooper LZ, Eskola J, Katz SL, Ratzan S. Addressing the vaccine  
9 confidence gap. *Lancet* 2011;378(9790):526-535.  
10  
11 26. Wallston KA, Wallston BS, Smith S and Dobbins CJ. Perceived control and health.  
12 *Curr Psychol* 1987;6(1):5-25.  
13  
14 27. Shim E, Chapman GB, Townsend JP and Galvani AP. The influence of altruism on  
15 influenza vaccination decisions. *J R Soc Interface* 2012;9(74): 2234-2243.  
16  
17 28. Lehmann BA, Robert ACR and Gerjo K. A qualitative study of the coverage of  
18 influenza vaccination on Dutch news sites and social media websites. *BMC public health*  
19 2013;121(10):742-751  
20  
21 29. Chapman GB and Coups EJ. Emotions and preventive health behavior: Worry, regret,  
22 and influenza vaccination. *Health Psychol* 2006;25(1):82-90.  
23  
24 30. Wheelock A, Parand A, Rigole B, Thomson A, Miraldo M, Vincent C, et al. Socio-  
25 Psychological Factors Driving Adult Vaccination: A Qualitative Study. *PLoS one* 2014;9(12).  
26  
27 31. Robinson A, Thomson R. Variability in patient preferences for participating in  
28 medical decision making: implication for the use of decision support tools. *Qual Health Care*  
29 2001;10(suppl 1):i34-i38.  
30  
31 32. Safran DG, Kosinski M, Tarlov AR, Rogers WH, Taira DA, Lieberman N and Ware  
32 JE. The Primary Care Assessment Survey: Tests of Data Quality and Measurement  
33 Performance. *Med Care* 1998;36(5):728-739.  
34  
35 33. Caille-Brillet A, Raude J, Lapidus N, De Lamballerie X, Carrat F, Setbon M. Trends  
36 in influenza vaccination behaviours—results from the CoPanFlu cohort, France, 2006 to 2011.  
37 *High Educ* 2013;419(28.9):26.6-31.2.  
38  
39 34. Saris WE and Gallhofer IN. Estimation of the effects of measurement characteristics  
40 on the quality of survey questions. In: Saris WE and Gallhofer IN, eds. *Design, Evaluation,*  
41 *and Analysis of Questionnaires for Survey Research*. Hoboken, NJ: John Wiley & Sons,  
42 2007.  
43  
44 35. Hosmer Jr DW, Lemeshow S. *Applied logistic regression*. John Wiley & Sons; 2004.  
45  
46 36. Nulty DD. The adequacy of response rates to online and paper surveys: what can be  
47 done? *Assess Eval High Educ* 2008;33(3):301-314.  
48  
49 37. Sheldon H, Graham C, Potheary N, Rasul F. Increasing response rates amongst black  
50 and minority ethnic and seldom heard groups. *Pickier Institute Europe*, 2007.  
51  
52  
53  
54  
55  
56  
57  
58  
59  
60



- 1  
2  
3 38. Riphagen Dalhuisen J. Predictors of seasonal influenza vaccination among healthcare  
4 workers in hospitals: a descriptive meta-analysis. *Occup Environ Med* 2012;69(4):230.  
5  
6 39. Friedman L & Wall M. Graphical views of suppression and multicollinearity in  
7 multiple linear regression. *Am Stat* 2005;59(2), 127-136.  
8  
9 40. MacKinnon DP, Krull JL & Lockwood CM. Equivalence of the mediation,  
10 confounding and suppression effect. *Prev Sci*, 2000;1(4):173-181.  
11  
12 41. Bowerman BL and O'Connell RT. *Linear statistical models: An applied approach*.  
13 Belmont, CA: Duxbury, 1990.  
14  
15 42. Field A. *Discovering statistics using IBM SPSS statistics*. 4th ed. London: Sage, 2013.  
16  
17 43. Cook RD and Weisberg S. *Residuals and influence in regression*. New York:  
18 Chapman & Hall, 1982.  
19  
20 44. Peretti-Watel P, Raude J, Sagaon-Teyssier L, Constant A, Verger P, Beck F. Attitudes  
21 toward vaccination and the H1N1 vaccine: Poor people's unfounded fears or legitimate  
22 concerns of the elite? *Soc Sci Med* 2014;109:10-18.  
23  
24 45. Ritov I and Baron J. Reluctance to vaccinate: Omission bias and ambiguity. *J Behav*  
25 *Decis Making* 1990;3(4):263-277.  
26  
27 46. Taddio A, Katz J, Ilersich AL, Koren G. Effect of neonatal circumcision on pain  
28 response during subsequent routine vaccination. *Lancet* 1997;349(9052):599-603.  
29  
30 47. Opel DJ, Heritage J, Taylor JA, Mangione-Smith R, Salas HS, DeVere V, Zhou C and  
31 Robinson JD. The architecture of provider-parent vaccine discussions at health supervision  
32 visits. *Pediatrics* 2013;132(6):1037-1046.  
33  
34 48. Thomas RE, Russell M, Lorenzetti D. Interventions to increase influenza vaccination  
35 rates of those 60 years and older in the community. *Cochrane Database Syst Rev*  
36 2010;8(9):CD005188.  
37  
38 49. Couper MP. Web surveys: A review of issues and approaches. *Public Opin Q*  
39 2000;64:464-494.  
40  
41 50. Pedersen MJ and Nielsen CV. Improving Survey Response Rates in Online Panels:  
42 Effects of Low-Cost Incentives and Cost-Free Text Appeal Interventions. *Soc Sci Comput*  
43 *Rev* 2014;34:229-243.  
44  
45 51. Tourangeau R, Groves RM, Kennedy C and Yan T. The presentation of a web survey,  
46 nonresponse and measurement error among members of web panel. *J Off Stat* 2009;25:299-  
47 321.  
48  
49 52. Keusch F. The role of topic interest and topic salience in online panel web surveys.  
50 *Int J Market Res* 2013;55:58-80.  
51  
52  
53  
54  
55  
56  
57  
58  
59  
60



- 1  
2  
3 53. Nichol K, Korn J, Baum P. Estimation of outpatient risk characteristics and influenza  
4 vaccination status: validation of a self-administered questionnaire. *Am J Prev Med*  
5 1990;7(4):199-203.  
6  
7  
8 54. US Census Bureau. *Statistical Abstract of the United States: 2012*. 131st ed.  
9 Washington, DC, 2011. <http://www.census.gov/compendia/statab/>.  
10  
11 55. Office for National Statistics. Annual Mid-year Population Estimates, 2013. Available  
12 from: [http://www.ons.gov.uk/ons/dcp171778\\_367167.pdf](http://www.ons.gov.uk/ons/dcp171778_367167.pdf). Accessed December 1, 2014.  
13  
14 56. Office for National Statistics. 2011 Census: Aggregate data (England and Wales)  
15 [computer file]. UK Data Service Census Support. <http://infuse.mimas.ac.uk>. Accessed  
16 December 1, 2014.  
17  
18 57. Department for Work and Pensions. Households Below Average Income - An  
19 analysis of the income distribution 1994/95 – 2012/13.  
20 [https://www.gov.uk/government/uploads/system/uploads/attachment\\_data/file/325416/house](https://www.gov.uk/government/uploads/system/uploads/attachment_data/file/325416/households-below-average-income-1994-1995-2012-2013.pdf)  
21 [holds-below-average-income-1994-1995-2012-2013.pdf](https://www.gov.uk/government/uploads/system/uploads/attachment_data/file/325416/households-below-average-income-1994-1995-2012-2013.pdf). Accessed April 20, 2015.  
22  
23 58. National Institute of Statistics and Economic Studies. Population census 2011.  
24 <http://www.insee.fr/>. Published 2012. Accessed April 15, 2015.  
25  
26 59. ECDC. Seasonal influenza vaccination and antiviral use in Europe – Overview of  
27 vaccination recommendations and coverage rates in the EU Member States for the 2013–14  
28 and 2014–15 influenza seasons. Published 2016. Accessed August 22, 2016.  
29  
30  
31  
32  
33  
34  
35  
36  
37  
38  
39  
40  
41  
42  
43  
44  
45  
46  
47  
48  
49  
50  
51  
52  
53  
54  
55  
56  
57  
58  
59  
60

## SUPPLEMENTARY MATERIAL

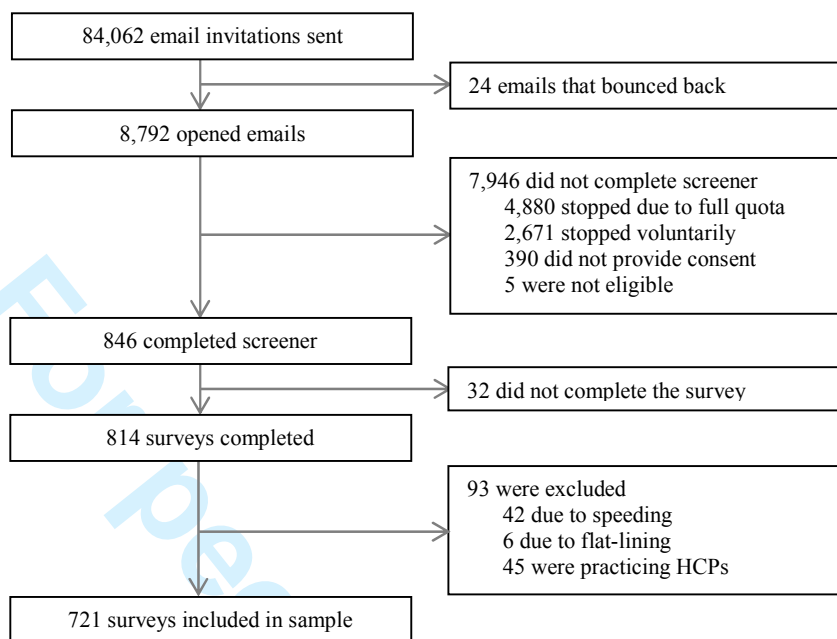

**Figure S1a.** Online sample recruitment flow diagram – US

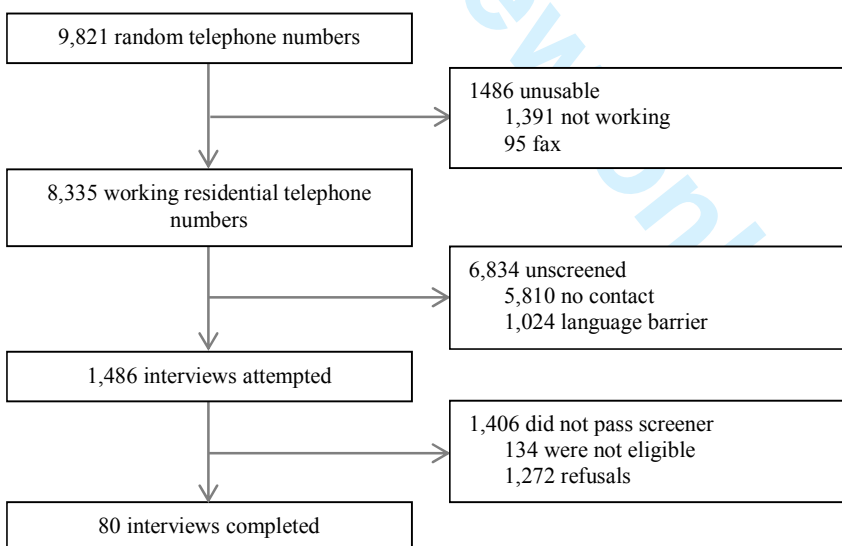

**Figure S1b.** Telephone sample recruitment flow diagram – US

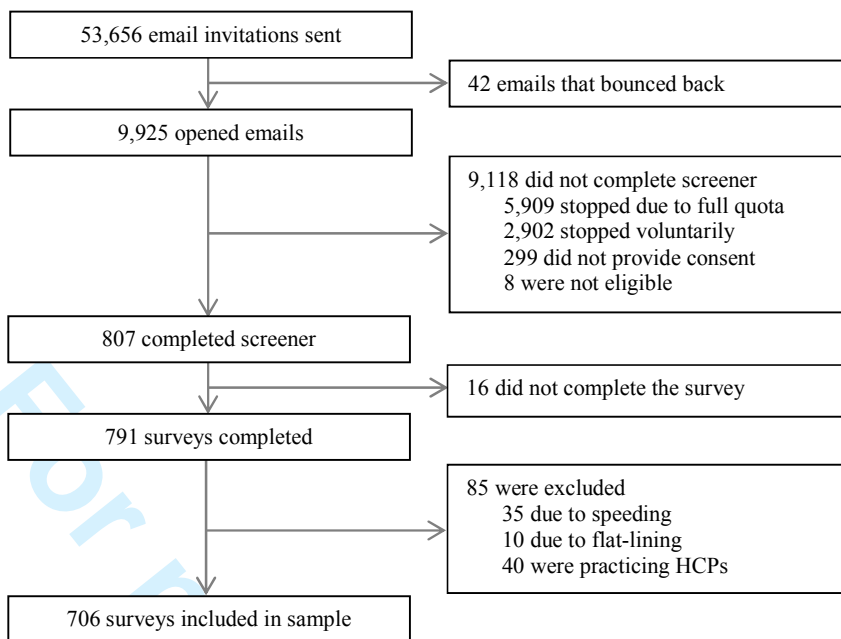

**Figure S2a.** Online sample recruitment flow diagram – UK

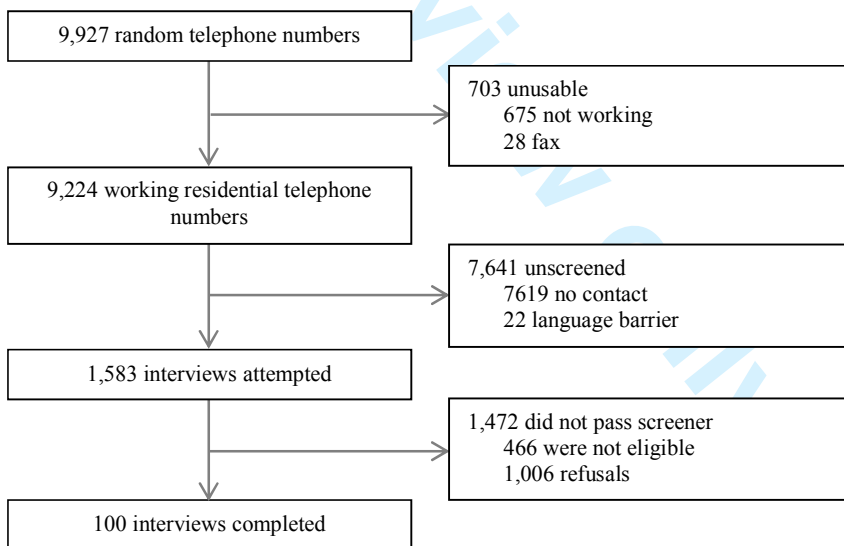

**Figure S2b.** Telephone sample recruitment flow diagram – UK

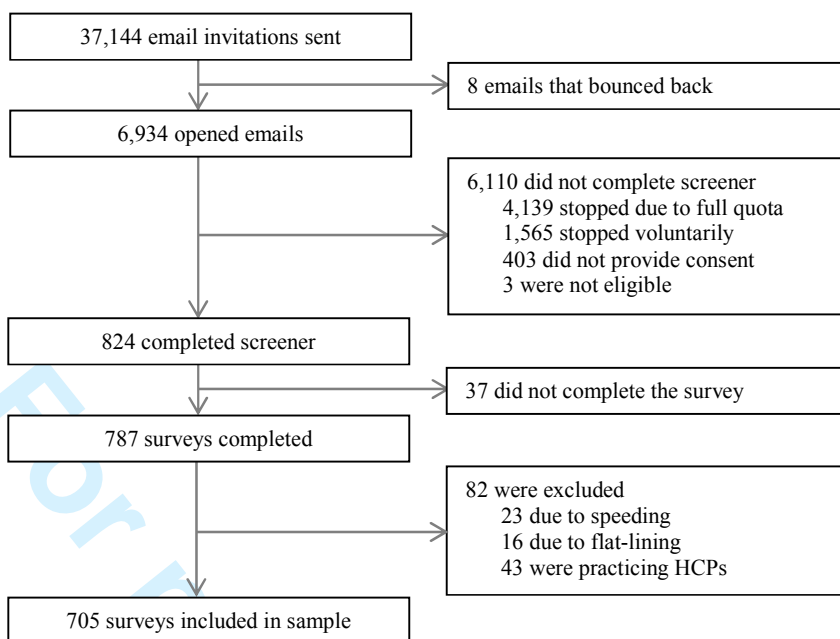

26 **Figure S3a.** Online sample recruitment flow diagram – France

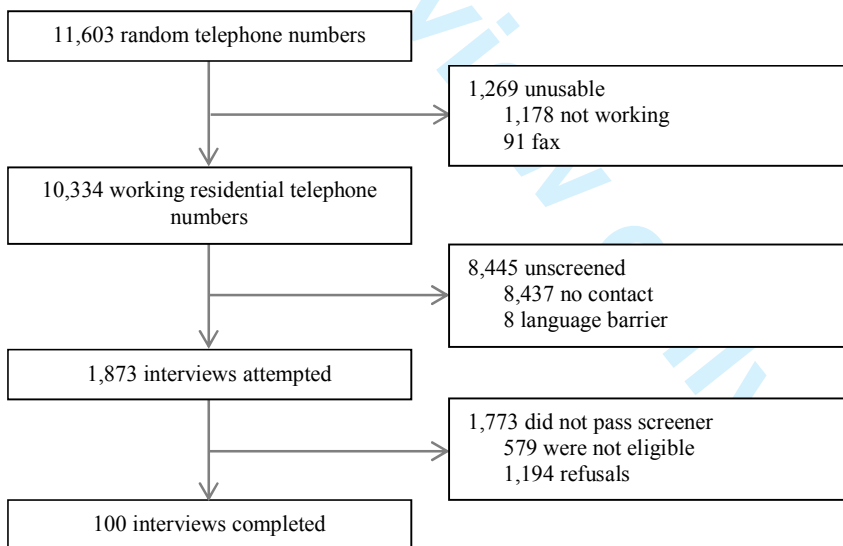

52 **Figure S3b.** Telephone sample recruitment flow diagram – France

**Table S1.** Included survey items

| Item                                                                                                                              | Response categories                                                                                                                                                                                                                                                                                                                                                                                                                                                                                                                                                                                                                                                                                                                                                                                                           |
|-----------------------------------------------------------------------------------------------------------------------------------|-------------------------------------------------------------------------------------------------------------------------------------------------------------------------------------------------------------------------------------------------------------------------------------------------------------------------------------------------------------------------------------------------------------------------------------------------------------------------------------------------------------------------------------------------------------------------------------------------------------------------------------------------------------------------------------------------------------------------------------------------------------------------------------------------------------------------------|
| 1) Have you received a flu vaccine in the past 6 months (this autumn / winter)?                                                   | Yes / no                                                                                                                                                                                                                                                                                                                                                                                                                                                                                                                                                                                                                                                                                                                                                                                                                      |
| 2) What is your date of birth?                                                                                                    | Date                                                                                                                                                                                                                                                                                                                                                                                                                                                                                                                                                                                                                                                                                                                                                                                                                          |
| 3) What is your gender?                                                                                                           | Female / male                                                                                                                                                                                                                                                                                                                                                                                                                                                                                                                                                                                                                                                                                                                                                                                                                 |
| 4) Which of the following ethnic groups do you feel you belong to?                                                                | List of country-specific groups                                                                                                                                                                                                                                                                                                                                                                                                                                                                                                                                                                                                                                                                                                                                                                                               |
| 5) What is your combined annual household income?                                                                                 | List of country-specific income brackets                                                                                                                                                                                                                                                                                                                                                                                                                                                                                                                                                                                                                                                                                                                                                                                      |
| 6) Which of the following best describes your current situation?                                                                  | Married or living with a partner / single / widowed / divorced or separated / other / prefer not to say                                                                                                                                                                                                                                                                                                                                                                                                                                                                                                                                                                                                                                                                                                                       |
| 7) Have you ever been diagnosed with any of the following conditions?                                                             | List of eligible conditions                                                                                                                                                                                                                                                                                                                                                                                                                                                                                                                                                                                                                                                                                                                                                                                                   |
| 8) What is the highest level of education you have completed?                                                                     | List of country-specific education levels                                                                                                                                                                                                                                                                                                                                                                                                                                                                                                                                                                                                                                                                                                                                                                                     |
| 9) Do you have a private health insurance                                                                                         | Yes / no                                                                                                                                                                                                                                                                                                                                                                                                                                                                                                                                                                                                                                                                                                                                                                                                                      |
| 10) Do you have public health insurance (e.g. Medicare) – US only                                                                 | Yes / no                                                                                                                                                                                                                                                                                                                                                                                                                                                                                                                                                                                                                                                                                                                                                                                                                      |
| 11) How actively do you participate with your physician in making decisions about health, generally? (Single select)              | <ol style="list-style-type: none"> <li>1. My physician always makes decisions for me</li> <li>2. I like to know the options available but still let my physician decide for me</li> <li>3. My physician and I make decisions together</li> <li>4. I make decisions for myself, after considering the advice of my physician</li> <li>5. I always make my own decisions, independently of the advice of my physician</li> </ol>                                                                                                                                                                                                                                                                                                                                                                                                |
| 12) Which of the following statements best represents how much you trust your physician? (Multiple select)                        | <ul style="list-style-type: none"> <li><input type="radio"/> I can tell my physician anything, even things that I might not tell anyone else</li> <li><input type="radio"/> My physician sometimes pretends to know things when he / she is not really sure</li> <li><input type="radio"/> I completely trust my physician's judgment about my medical care</li> <li><input type="radio"/> My physician cares more about cutting down costs than about doing what is needed for my health</li> <li><input type="radio"/> My physician would always tell me the truth about my health, even if there was bad news</li> <li><input type="radio"/> My physician cares as much as I do about my health</li> <li><input type="radio"/> If a mistake was made in my treatment, my physician would try to hide it from me</li> </ul> |
| 13) I generally trust vaccine manufacturers / pharmaceutical companies                                                            | Scale 0-10: strongly disagree / strongly agree                                                                                                                                                                                                                                                                                                                                                                                                                                                                                                                                                                                                                                                                                                                                                                                |
| 14) I generally trust the National Health Service (or equivalent)                                                                 | Scale 0-10: strongly disagree / strongly agree                                                                                                                                                                                                                                                                                                                                                                                                                                                                                                                                                                                                                                                                                                                                                                                |
| 15) Which of these statements best represents your past experiences as a child? (Multiple select)                                 | <ul style="list-style-type: none"> <li><input type="radio"/> I had a bad experience with vaccines or injections</li> <li><input type="radio"/> I had a scary health-related experience</li> </ul>                                                                                                                                                                                                                                                                                                                                                                                                                                                                                                                                                                                                                             |
| 16) I am scared of getting the flu                                                                                                | Scale 0-10: strongly disagree / strongly agree                                                                                                                                                                                                                                                                                                                                                                                                                                                                                                                                                                                                                                                                                                                                                                                |
| 17) I believe that if I got the flu I would have to stay in bed for... (Single select)                                            | <ol style="list-style-type: none"> <li>1. 0 days</li> <li>2. 1-2 days</li> <li>3. 3-4 days</li> <li>4. 5-6 days</li> <li>5. 1 week – 2 weeks</li> <li>6. More than 2 weeks</li> </ol>                                                                                                                                                                                                                                                                                                                                                                                                                                                                                                                                                                                                                                         |
| 18) The flu could make me severely ill                                                                                            | Scale 0-10: strongly disagree / strongly agree                                                                                                                                                                                                                                                                                                                                                                                                                                                                                                                                                                                                                                                                                                                                                                                |
| 19) If I get a flu vaccine, I will be protected against the flu                                                                   | Scale 0-10: strongly disagree / strongly agree                                                                                                                                                                                                                                                                                                                                                                                                                                                                                                                                                                                                                                                                                                                                                                                |
| 20) With no flu vaccine, I would feel very vulnerable to the flu                                                                  | Scale 0-10: strongly disagree / strongly agree                                                                                                                                                                                                                                                                                                                                                                                                                                                                                                                                                                                                                                                                                                                                                                                |
| 21) If I got the flu, I would feel sicker than other people my age                                                                | Scale 0-10: strongly disagree / strongly agree                                                                                                                                                                                                                                                                                                                                                                                                                                                                                                                                                                                                                                                                                                                                                                                |
| 22) I am confident I can avoid getting the flu, even without the flu vaccine                                                      | Scale 0-10: strongly disagree / strongly agree                                                                                                                                                                                                                                                                                                                                                                                                                                                                                                                                                                                                                                                                                                                                                                                |
| 23) Without a flu vaccine, I am sure I would get the flu this winter                                                              | Scale 0-10: strongly disagree / strongly agree                                                                                                                                                                                                                                                                                                                                                                                                                                                                                                                                                                                                                                                                                                                                                                                |
| 24) I feel I know enough about the flu vaccine to make an informed decision about whether to get vaccinated or not                | Scale 0-10: strongly disagree / strongly agree                                                                                                                                                                                                                                                                                                                                                                                                                                                                                                                                                                                                                                                                                                                                                                                |
| 25) My physician thinks I should get a flu vaccine                                                                                | Scale 0-10: strongly disagree / strongly agree<br><input type="radio"/> I don't know/not applicable                                                                                                                                                                                                                                                                                                                                                                                                                                                                                                                                                                                                                                                                                                                           |
| 26) My relatives or close friends think that I should get a flu vaccine                                                           | Scale 0-10: strongly disagree / strongly agree<br><input type="radio"/> I don't know/not applicable                                                                                                                                                                                                                                                                                                                                                                                                                                                                                                                                                                                                                                                                                                                           |
| 27) If I don't get the flu vaccine and I get the flu, passing the flu to other people would worry me because it would be my fault | Scale 0-10: strongly disagree / strongly agree                                                                                                                                                                                                                                                                                                                                                                                                                                                                                                                                                                                                                                                                                                                                                                                |
| 28) Which of the following statements apply to you? (Multiple select)                                                             | <ul style="list-style-type: none"> <li><input type="radio"/> It is easy for me to get to a place where I can get the flu vaccine</li> </ul>                                                                                                                                                                                                                                                                                                                                                                                                                                                                                                                                                                                                                                                                                   |

|    |                                                                                                                 |                                                |
|----|-----------------------------------------------------------------------------------------------------------------|------------------------------------------------|
| 1  |                                                                                                                 |                                                |
| 2  |                                                                                                                 |                                                |
| 3  |                                                                                                                 | o I can make time to get the flu vaccine       |
| 4  | 29) If I don't get a flu vaccine and end up getting the flu this winter, I would regret not getting the vaccine | Scale 0-10: strongly disagree / strongly agree |
| 5  |                                                                                                                 |                                                |
| 6  | 30) The flu vaccine is painful                                                                                  | Scale 0-10: strongly disagree / strongly agree |
| 7  |                                                                                                                 | o I don't know                                 |
| 8  | 31) The flu vaccine could give me the flu                                                                       | Scale 0-10: strongly disagree / strongly agree |
| 9  | 32) I am worried that some of the contents of the flu vaccine may be dangerous for me                           | Scale 0-10: strongly disagree / strongly agree |
| 10 | 33) I am confident I can get a flu vaccine if I want one                                                        | Scale 0-10: strongly disagree / strongly agree |
| 11 |                                                                                                                 |                                                |
| 12 |                                                                                                                 |                                                |
| 13 |                                                                                                                 |                                                |
| 14 |                                                                                                                 |                                                |
| 15 |                                                                                                                 |                                                |
| 16 |                                                                                                                 |                                                |
| 17 |                                                                                                                 |                                                |
| 18 |                                                                                                                 |                                                |
| 19 |                                                                                                                 |                                                |
| 20 |                                                                                                                 |                                                |
| 21 |                                                                                                                 |                                                |
| 22 |                                                                                                                 |                                                |
| 23 |                                                                                                                 |                                                |
| 24 |                                                                                                                 |                                                |
| 25 |                                                                                                                 |                                                |
| 26 |                                                                                                                 |                                                |
| 27 |                                                                                                                 |                                                |
| 28 |                                                                                                                 |                                                |
| 29 |                                                                                                                 |                                                |
| 30 |                                                                                                                 |                                                |
| 31 |                                                                                                                 |                                                |
| 32 |                                                                                                                 |                                                |
| 33 |                                                                                                                 |                                                |
| 34 |                                                                                                                 |                                                |
| 35 |                                                                                                                 |                                                |
| 36 |                                                                                                                 |                                                |
| 37 |                                                                                                                 |                                                |
| 38 |                                                                                                                 |                                                |
| 39 |                                                                                                                 |                                                |
| 40 |                                                                                                                 |                                                |
| 41 |                                                                                                                 |                                                |
| 42 |                                                                                                                 |                                                |
| 43 |                                                                                                                 |                                                |
| 44 |                                                                                                                 |                                                |
| 45 |                                                                                                                 |                                                |
| 46 |                                                                                                                 |                                                |
| 47 |                                                                                                                 |                                                |
| 48 |                                                                                                                 |                                                |
| 49 |                                                                                                                 |                                                |
| 50 |                                                                                                                 |                                                |
| 51 |                                                                                                                 |                                                |
| 52 |                                                                                                                 |                                                |
| 53 |                                                                                                                 |                                                |
| 54 |                                                                                                                 |                                                |
| 55 |                                                                                                                 |                                                |
| 56 |                                                                                                                 |                                                |
| 57 |                                                                                                                 |                                                |
| 58 |                                                                                                                 |                                                |
| 59 |                                                                                                                 |                                                |
| 60 |                                                                                                                 |                                                |

For peer review only

**Table S2.** Determinants of influenza vaccination by influenza vaccination status – US

| Explanatory variables                                      | Min | Max | Vaccinated |      |       | Unvaccinated |           |      | SE    | 95% C.I. |       | t/X2   | df     | p-value |        |       |
|------------------------------------------------------------|-----|-----|------------|------|-------|--------------|-----------|------|-------|----------|-------|--------|--------|---------|--------|-------|
|                                                            |     |     | Total/yes  | M    | SD    | SE           | Total/yes | M    |       | SD       | SE    |        |        |         | Lower  | Upper |
| <b>1. Socio-economic, demographic and health variables</b> |     |     |            |      |       |              |           |      |       |          |       |        |        |         |        |       |
| 2) Age (dummy: 1 = ≥65)                                    | 0   | 1   | 378/105    | -    | -     | -            | 423/54    | -    | -     | -        | -     | -      | -      | 28.275  | 1.000  | 0.001 |
| 7) Eligible health condition (dummy: 1 = yes)              | 0   | 1   | 378/135    | -    | -     | -            | 423/64    | -    | -     | -        | -     | -      | -      | 45.299  | 1.000  | 0.001 |
| 9) Private health insurance (dummy: 1 = yes)               | 0   | 1   | 378/253    | -    | -     | -            | 423/234   | -    | -     | -        | -     | -      | -      | 11.293  | 1.000  | 0.001 |
| 10) Public health insurance (dummy: 1 = yes)               | 0   | 1   | 378/170    | -    | -     | -            | 423/122   | -    | -     | -        | -     | -      | -      | 22.425  | 1.000  | 0.001 |
| 3) Gender (dummy: 1 = female)                              | 0   | 1   | 378/182    | -    | -     | -            | 423/218   | -    | -     | -        | -     | -      | -      | 0.917   | 1.000  | 0.99  |
| 6) Marital status (dummy: 1 = in a partnership)            | 0   | 1   | 374/245    | -    | -     | -            | 418/236   | -    | -     | -        | -     | -      | -      | 6.777   | 1.000  | 0.01  |
| 5) Income bands (1 = ≤\$10,000 - 9 = ≥\$150,000)           | 1   | 9   | 343        | 2.97 | 1.760 | 0.106        | 392       | 5.00 | 2.239 | .113     | 0.162 | -1.207 | -0.572 | -5.495  | 733.00 | 0.001 |
| 8) Level of education (dummy: 1 = university degree)       | 0   | 1   | 365/228    | -    | -     | -            | 399/207   | -    | -     | -        | -     | -      | -      | 8.712   | 1.000  | 0.01  |
| 4) Ethnicity (dummy: 1 = white)                            | 0   | 1   | 375/262    | -    | -     | -            | 420/291   | -    | -     | -        | -     | -      | -      | 0.032   | 1.000  | 0.99  |
| <b>2. Practical barriers to influenza vaccination</b>      |     |     |            |      |       |              |           |      |       |          |       |        |        |         |        |       |
| 28) Vaccine access (dummy: 1 = yes)                        | 0   | 1   | 378/340    | -    | -     | -            | 423/317   | -    | -     | -        | -     | -      | -      | 30.484  | 1.000  | 0.001 |
| 28) Time to vaccinate (dummy: 1 = yes)                     | 0   | 1   | 378/336    | -    | -     | -            | 423/282   | -    | -     | -        | -     | -      | -      | 55.924  | 1.000  | 0.001 |
| <b>3. Social influence</b>                                 |     |     |            |      |       |              |           |      |       |          |       |        |        |         |        |       |
| 25) Physician thinks I should vaccinate*                   | 0   | 10  | 354        | 9.00 | 1.755 | 0.093        | 338       | 5.86 | 3.393 | 0.185    | 0.207 | -3.543 | -2.730 | -15.166 | 499.95 | 0.001 |
| 26) Relatives think I should vaccinate*                    | 0   | 10  | 329        | 8.02 | 2.405 | 0.133        | 361       | 4.67 | 3.277 | 0.172    | 0.218 | -3.775 | -2.921 | -15.391 | 658.72 | 0.001 |
| <b>4. Influenza perceptions</b>                            |     |     |            |      |       |              |           |      |       |          |       |        |        |         |        |       |
| 20) Vulnerability to influenza                             | 0   | 10  | 378        | 7.47 | 2.587 | 0.133        | 423       | 3.14 | 2.865 | 0.139    | 0.193 | -4.712 | -3.956 | -22.502 | 798.91 | 0.001 |
| 21) Susceptibility to influenza                            | 0   | 10  | 378        | 4.80 | 3.177 | 0.163        | 423       | 3.68 | 2.902 | 0.141    | 0.215 | -1.550 | -0.706 | -5.251  | 799.00 | 0.001 |
| 23) Likelihood of influenza                                | 0   | 10  | 378        | 5.76 | 2.868 | 0.147        | 423       | 2.22 | 2.607 | 0.127    | 0.194 | -3.926 | -3.163 | -18.226 | 766.19 | 0.001 |
| 17) Severity of influenza (bed days)                       | 1   | 6   | 378        | 2.94 | 1.149 | 0.059        | 423       | 2.66 | 1.108 | 0.054    | 0.080 | -0.437 | -0.123 | -3.510  | 799.00 | 0.001 |
| 18) Severity of influenza                                  | 0   | 10  | 378        | 7.74 | 2.591 | 0.133        | 423       | 6.36 | 2.701 | 0.131    | 0.188 | -1.745 | -1.009 | -7.341  | 799.00 | 0.001 |
| 16) Fear of influenza                                      | 0   | 10  | 378        | 5.26 | 3.276 | 0.169        | 423       | 3.57 | 2.958 | 0.144    | 0.222 | -2.132 | -1.262 | -7.659  | 764.04 | 0.001 |
| 27) Worry of transmitting influenza                        | 0   | 10  | 378        | 6.76 | 3.019 | 0.155        | 423       | 4.83 | 3.198 | 0.155    | 0.220 | -2.365 | -1.499 | -8.764  | 799.00 | 0.001 |
| 22) Perceived control (over influenza)                     | 0   | 10  | 378        | 3.68 | 3.065 | 0.158        | 423       | 6.49 | 2.741 | 0.133    | 0.206 | 2.412  | 3.222  | 13.645  | 761.04 | 0.001 |
| 29) Anticipated regret of not vaccinating                  | 0   | 10  | 378        | 7.11 | 3.118 | 0.160        | 423       | 6.66 | 2.823 | 0.137    | 0.210 | -0.862 | -0.037 | -2.141  | 799.00 | 0.05  |
| <b>5. Influenza vaccine perceptions</b>                    |     |     |            |      |       |              |           |      |       |          |       |        |        |         |        |       |
| 24) Perceived knowledge of vaccine (informed decisions)*   | 0   | 10  | 377        | 8.42 | 2.150 | 0.111        | 423       | 7.12 | 2.597 | 0.126    | 0.168 | -1.631 | -0.972 | -7.750  | 793.77 | 0.001 |
| 19) Vaccine effectiveness                                  | 0   | 10  | 378        | 7.38 | 2.172 | 0.112        | 423       | 4.12 | 2.942 | 0.143    | 0.182 | -3.612 | -2.899 | -17.934 | 772.19 | 0.001 |
| 30) The vaccine is painful*                                | 0   | 10  | 377        | 3.00 | 3.231 | 0.166        | 356       | 3.73 | 3.099 | 0.164    | 0.234 | 0.271  | 1.190  | 3.120   | 731.00 | 0.01  |
| 31) The vaccine could transmit influenza                   | 0   | 10  | 378        | 3.01 | 3.270 | 0.168        | 423       | 5.58 | 3.222 | 0.157    | 0.230 | 2.128  | 3.029  | 11.228  | 799.00 | 0.001 |
| 32) Vaccine contents could be dangerous                    | 0   | 10  | 378        | 3.03 | 3.173 | 0.163        | 423       | 5.31 | 3.364 | 0.164    | 0.232 | 1.828  | 2.738  | 9.849   | 799.00 | 0.001 |
| 33) Vaccine-related self-efficacy                          | 0   | 10  | 378        | 7.93 | 2.736 | 0.141        | 423       | 4.20 | 3.389 | 0.165    | 0.217 | -4.156 | -3.305 | -17.213 | 791.02 | 0.001 |

1  
2  
3  
4  
5  
6  
7  
8  
9  
10  
11  
12  
13  
14  
15  
16  
17  
18  
19  
20  
21  
22  
23  
24  
25  
26  
27  
28  
29  
30  
31  
32  
33  
34  
35  
36  
37  
38  
39  
40  
41  
42  
43  
44  
45  
46  
47  
48  
49

| Explanatory variables                                      | Min | Max | Vaccinated |      |       | Unvaccinated |        |      | SE    | 95% C.I. |       | t / $\chi^2$ | df     | p <     |        |       |
|------------------------------------------------------------|-----|-----|------------|------|-------|--------------|--------|------|-------|----------|-------|--------------|--------|---------|--------|-------|
|                                                            |     |     | N          | Mean | SD    | SE           | N      | Mean |       | SD       | SE    |              |        |         | Lower  | Upper |
| <b>6. Trust toward vaccination and stakeholders</b>        |     |     |            |      |       |              |        |      |       |          |       |              |        |         |        |       |
| 12) Trust physician (scale)                                | 0   | 7   | 378        | 7.94 | 2.261 | 0.119        | 423    | 4.35 | 1.561 | 0.076    | 0.115 | -0.579       | -0.129 | -3.087  | 773.65 | 0.01  |
| 13) Trust in vaccine manufacturers                         | 0   | 10  | 378        | 7.04 | 2.212 | 0.114        | 423    | 4.78 | 2.732 | 0.133    | 0.181 | -2.209       | -1.499 | -10.255 | 798.57 | 0.001 |
| 14) Trust in the NHS                                       | 0   | 10  | 378        | 4.71 | 1.672 | 0.086        | 423    | 5.47 | 2.751 | 0.134    | 0.176 | -1.914       | -1.225 | -8.937  | 790.44 | 0.001 |
| <b>7. Shared decision-making and childhood experiences</b> |     |     |            |      |       |              |        |      |       |          |       |              |        |         |        |       |
| 11) Shared decision-making – physician                     | 1   | 5   | 378        | 3.03 | 0.889 | 0.046        | 423    | 3.30 | 0.953 | 0.046    | 0.065 | 0.141        | 0.396  | 4.127   | 797.52 | 0.001 |
| 15) Bad experience with vaccines (child)                   | 0   | 1   | 378/41     | -    | -     | -            | 423/36 | -    | -     | -        | -     | -            | -      | 1.254   | 1.000  | 0.99  |
| 15) Scary health experience (child)                        | 0   | 1   | 378/48     | -    | -     | -            | 423/31 | -    | -     | -        | -     | -            | -      | 6.475   | 1.000  | 0.01  |

C.I. = confidence interval; df = degrees of freedom; DoH = Department of Health; HCP = healthcare professional; p = p-value; SD = standard deviation; SE = standard error. df with decimals are adjusted to correct for the violation of the assumption of equal variances (Levene's Test for Equality of Variances was statistically significant). p-values were obtained using Chi-square tests ( $\chi^2$ ) for categorical variables and Independent t-tests (t) for interval or continuous variables. p < 0.05 was considered statistically significant. \*Variables with "I do not know" responses which were dichotomised for regression analysis. In brackets is the number of the question corresponding to each explanatory variable (see Table S1).



**Table S3.** Determinants of influenza vaccination by influenza vaccination status – UK

| Explanatory variables                                      | Min | Max | Vaccinated |      |        | Unvaccinated |           |      | SE     | 95% C.I. |        | t/X2   | df     | p-value |        |       |
|------------------------------------------------------------|-----|-----|------------|------|--------|--------------|-----------|------|--------|----------|--------|--------|--------|---------|--------|-------|
|                                                            |     |     | Total/yes  | M    | SD     | SE           | Total/yes | M    |        | SD       | SE     |        |        |         | Lower  | Upper |
| <b>1. Socio-economic, demographic and health variables</b> |     |     |            |      |        |              |           |      |        |          |        |        |        |         |        |       |
| 2) Age (dummy: 1 = ≥65)                                    | 0   | 1   | 302/134    | -    | -      | -            | 504/45    | -    | -      | -        | -      | -      | -      | 137.30  | 1.000  | 0.001 |
| 7) Eligible health condition (dummy: 1 = yes)              | 0   | 1   | 302/141    | -    | -      | -            | 504/42    | -    | -      | -        | -      | -      | -      | 166.87  | 1.000  | 0.001 |
| 9) Private health insurance (dummy: 1 = yes)               | 0   | 1   | 302/52     | -    | -      | -            | 504/57    | -    | -      | -        | -      | -      | -      | 5.638   | 1.000  | 0.05  |
| 3) Gender (dummy: 1 = female)                              | 0   | 1   | 302/147    | -    | -      | -            | 504/266   | -    | -      | -        | -      | -      | -      | 1.272   | 1.000  | 0.99  |
| 6) Marital status (dummy: 1 = in a partnership)            | 0   | 1   | 300/177    | -    | -      | -            | 501/270   | -    | -      | -        | -      | -      | -      | 1.985   | 1.000  | 0.99  |
| 5) Income bands (1 = ≤£10,000 - 8 = ≥£70,000)              | 1   | 8   | 274        | 2.97 | 1.760  | 0.106        | 472       | 3.19 | 1.853  | 0.086    | 0.139  | -0.055 | 0.490  | 1.568   | 734.00 | 0.99  |
| 8) Level of education (dummy: 1 = university degree)       | 0   | 1   | 292/103    | -    | -      | -            | 492/198   | -    | -      | -        | -      | -      | -      | 1.914   | 1.000  | 0.99  |
| 4) Ethnicity (1 = white)                                   | 0   | 1   | 302/278    | -    | -      | -            | 497/435   | -    | -      | -        | -      | -      | -      | 4.010   | 1.000  | 0.05  |
| <b>2. Practical barriers to influenza vaccination</b>      |     |     |            |      |        |              |           |      |        |          |        |        |        |         |        |       |
| 28) Vaccine access (dummy: 1 = yes)                        | 0   | 1   | 302/281    | -    | -      | -            | 504/371   | -    | -      | -        | -      | -      | -      | 46.151  | 1.000  | 0.001 |
| 28) Time to vaccinate (dummy: 1 = yes)                     | 0   | 1   | 302/270    | -    | -      | -            | 504/360   | -    | -      | -        | -      | -      | -      | 35.750  | 1.000  | 0.001 |
| <b>3. Social influence</b>                                 |     |     |            |      |        |              |           |      |        |          |        |        |        |         |        |       |
| 25) Physician thinks I should vaccinate*                   | 0   | 10  | 271        | 8.86 | 1.943  | 0.118        | 370       | 3.38 | 3.307  | 0.182    | 0.217  | -5.906 | -5.054 | -25.261 | 546.17 | 0.001 |
| 26) Relatives think I should vaccinate*                    | 0   | 10  | 255        | 7.52 | 2.691  | 0.169        | 390       | 2.80 | 3.005  | 0.152    | 0.227  | -5.161 | -4.269 | -20.767 | 583.61 | 0.001 |
| <b>4. Influenza perceptions</b>                            |     |     |            |      |        |              |           |      |        |          |        |        |        |         |        |       |
| 20) Vulnerability to influenza                             | 0   | 10  | 302        | 7.22 | 2.6893 | 0.155        | 504       | 3.10 | 2.5019 | 0.111    | -4.112 | -4.480 | -3.744 | -21.956 | 804.00 | 0.001 |
| 21) Susceptibility to influenza                            | 0   | 10  | 302        | 5.28 | 3.162  | 0.182        | 504       | 3.36 | 2.805  | 0.125    | -1.924 | -2.358 | -1.491 | -8.719  | 575.29 | 0.001 |
| 23) Likelihood of influenza                                | 0   | 10  | 302        | 5.66 | 2.707  | 0.156        | 504       | 2.31 | 2.480  | 0.110    | -3.348 | -3.715 | -2.981 | -17.921 | 804.00 | 0.001 |
| 17) Severity of influenza (bed days)                       | 1   | 6   | 302        | 3.14 | 1.216  | 0.070        | 504       | 2.83 | 1.227  | 0.055    | -0.311 | -0.486 | -0.136 | -3.496  | 804.00 | 0.001 |
| 18) Severity of influenza                                  | 0   | 10  | 302        | 7.90 | 2.396  | 0.138        | 504       | 6.06 | 2.552  | 0.114    | -1.836 | -2.187 | -1.485 | -10.273 | 665.45 | 0.001 |
| 16) Fear of influenza                                      | 0   | 10  | 302        | 4.87 | 3.200  | 0.184        | 504       | 3.14 | 2.696  | 0.120    | -1.732 | -2.164 | -1.300 | -7.879  | 551.80 | 0.001 |
| 27) Worry of transmitting influenza                        | 0   | 10  | 302        | 6.64 | 2.900  | 0.167        | 504       | 4.70 | 2.920  | 0.130    | -1.937 | -2.353 | -1.521 | -9.140  | 804.00 | 0.001 |
| 22) Perceived control (over influenza)                     | 0   | 10  | 302        | 3.21 | 2.703  | 0.156        | 504       | 5.68 | 2.595  | 0.116    | 2.472  | 2.095  | 2.849  | 12.886  | 804.00 | 0.001 |
| 29) Anticipated regret of not vaccinating                  | 0   | 10  | 302        | 8.52 | 2.176  | 0.125        | 504       | 3.94 | 3.027  | 0.135    | -4.582 | -4.943 | -4.221 | -24.901 | 777.86 | 0.001 |
| <b>5. Influenza vaccine perceptions</b>                    |     |     |            |      |        |              |           |      |        |          |        |        |        |         |        |       |
| 24) Perceived knowledge of vaccine (informed decisions)*   | 0   | 10  | 301        | 8.26 | 2.033  | 0.117        | 502       | 6.44 | 2.611  | 0.117    | -1.826 | -2.151 | -1.502 | -11.050 | 748.41 | 0.001 |
| 19) Vaccine effectiveness                                  | 0   | 10  | 302        | 7.50 | 2.194  | 0.126        | 504       | 5.24 | 2.768  | 0.123    | -2.257 | -2.603 | -1.910 | -12.786 | 743.90 | 0.001 |
| 30) The vaccine is painful*                                | 0   | 10  | 299        | 2.38 | 2.958  | 0.171        | 364       | 3.06 | 2.899  | 0.152    | 0.228  | 0.231  | 1.128  | 2.977   | 661.00 | 0.01  |
| 31) The vaccine could transmit influenza                   | 0   | 10  | 302        | 2.80 | 3.090  | 0.178        | 504       | 4.18 | 3.019  | 0.135    | 1.377  | 0.941  | 1.812  | 6.210   | 804.00 | 0.001 |
| 32) Vaccine contents could be dangerous                    | 0   | 10  | 302        | 2.41 | 2.758  | 0.159        | 504       | 3.42 | 2.992  | 0.133    | 1.008  | 0.601  | 1.415  | 4.863   | 674.42 | 0.001 |
| 33) Vaccine-related self-efficacy                          | 0   | 10  | 302        | 9.05 | 1.803  | 0.104        | 504       | 7.16 | 2.880  | 0.128    | -1.890 | -2.214 | -1.566 | -11.449 | 802.47 | 0.001 |

| Explanatory variables                                      | Min | Max | Vaccinated |      |       | Unvaccinated |        |      | SE    | 95% C.I. |        | t / $\chi^2$ | df     | p <    |        |       |
|------------------------------------------------------------|-----|-----|------------|------|-------|--------------|--------|------|-------|----------|--------|--------------|--------|--------|--------|-------|
|                                                            |     |     | N          | Mean | SD    | SE           | N      | Mean |       | SD       | SE     |              |        |        | Lower  | Upper |
| <b>6. Trust toward vaccination and stakeholders</b>        |     |     |            |      |       |              |        |      |       |          |        |              |        |        |        |       |
| 12) Trust physician (scale)                                | 0   | 7   | 302        | 4.68 | 1.742 | 0.100        | 504    | 3.99 | 1.538 | 0.069    | -0.687 | -0.925       | -0.448 | -5.655 | 572.95 | 0.001 |
| 13) Trust in vaccine manufacturers                         | 0   | 10  | 302        | 6.71 | 2.187 | 0.126        | 504    | 5.58 | 2.513 | 0.112    | -1.127 | -1.458       | -0.796 | -6.691 | 702.58 | 0.001 |
| 14) Trust in the NHS                                       | 0   | 10  | 302        | 7.71 | 1.954 | 0.112        | 504    | 6.86 | 2.156 | 0.096    | -0.849 | -1.146       | -0.551 | -5.599 | 804.00 | 0.001 |
| <b>7. Shared decision-making and childhood experiences</b> |     |     |            |      |       |              |        |      |       |          |        |              |        |        |        |       |
| 11) Shared decision-making – physician                     | 1   | 5   | 302        | 2.85 | 0.908 | 0.052        | 504    | 3.21 | 1.000 | 0.045    | 0.357  | 0.223        | 0.492  | 5.203  | 681.88 | 0.001 |
| 15) Bad experience with vaccines (child)                   | 0   | 1   | 302/22     | -    | -     | -            | 504/63 | -    | -     | -        | -      | -            | -      | 5.445  | 1.000  | 0.05  |
| 15) Scary health experience (child)                        | 0   | 1   | 302/58     | -    | -     | -            | 504/45 | -    | -     | -        | -      | -            | -      | 17.893 | 1.000  | 0.001 |

C.I. = confidence interval; df = degrees of freedom; NHS = National Health Service; HCP = healthcare professional; p = p-value; SD = standard deviation; SE = standard error. df with decimals are adjusted to correct for the violation of the assumption of equal variances (Levene's Test for Equality of Variances was statistically significant). p-values were obtained using Chi-square tests ( $\chi^2$ ) for categorical variables and Independent t-tests (t) for interval or continuous variables. p < 0.05 was considered statistically significant. \*Variables with "I do not know" responses which were dichotomised for regression analysis. In brackets is the number of the question corresponding to each explanatory variable (see Table S1).

**Table S4.** Determinants of influenza vaccination by influenza vaccination status – France

| Explanatory variables                                      | Min | Max | Vaccinated |      |       | Unvaccinated |           |      | SE    | 95% C.I. |       | t/X2   | df     | p-value |        |       |
|------------------------------------------------------------|-----|-----|------------|------|-------|--------------|-----------|------|-------|----------|-------|--------|--------|---------|--------|-------|
|                                                            |     |     | Total/yes  | M    | SD    | SE           | Total/yes | M    | SD    | SE       | Lower | Upper  |        |         |        |       |
| <b>1. Socio-economic, demographic and health variables</b> |     |     |            |      |       |              |           |      |       |          |       |        |        |         |        |       |
| 2) Age (dummy: 1 = ≥65)                                    | 0   | 1   | 192/95     | -    | -     | -            | 613/94    | -    | -     | -        | -     | -      | 94.877 | 1.000   | 0.001  |       |
| 7) Eligible health condition (dummy: 1 = yes)              | 0   | 1   | 192/71     | -    | -     | -            | 613/120   | -    | -     | -        | -     | -      | 24.469 | 1.000   | 0.001  |       |
| 9) Private health insurance (dummy: 1 = yes)               | 0   | 1   | 192/180    | -    | -     | -            | 613/529   | -    | -     | -        | -     | -      | 7.732  | 1.000   | 0.005  |       |
| 3) Gender (dummy: 1 = female)                              | 0   | 1   | 192/97     | -    | -     | -            | 613/334   | -    | -     | -        | -     | -      | 0.924  | 1.000   | 0.99   |       |
| 6) Marital status (dummy: 1 = in a partnership)            | 0   | 1   | 190/120    | -    | -     | -            | 605/314   | -    | -     | -        | -     | -      | 7.391  | 1.000   | 0.01   |       |
| 5) Income bands (1 = ≤£10,000 - 8 = ≥£70,000)              | 1   | 6   | 165        | 2.78 | 1.269 | 0.099        | 539       | 2.35 | 1.272 | 0.055    | 0.11  | -0.65  | -0.21  | -3.81   | 702.00 | 0.001 |
| 8) Level of education (dummy: 1 = university degree)       | 0   | 1   | 182/64     | -    | -     | -            | 570/171   | -    | -     | -        | -     | -      | 1.713  | 1.000   | 0.99   |       |
| <b>2. Practical barriers to influenza vaccination</b>      |     |     |            |      |       |              |           |      |       |          |       |        |        |         |        |       |
| 28) Vaccine access (dummy: 1 = yes)                        | 0   | 1   | 192/159    | -    | -     | -            | 613/445   | -    | -     | -        | -     | -      | 8.149  | 1.000   | 0.01   |       |
| 28) Time to vaccinate (dummy: 1 = yes)                     | 0   | 1   | 192/165    | -    | -     | -            | 613/436   | -    | -     | -        | -     | -      | 16.954 | 1.000   | 0.001  |       |
| <b>3. Social influence</b>                                 |     |     |            |      |       |              |           |      |       |          |       |        |        |         |        |       |
| 25) Physician thinks I should vaccinate*                   | 0   | 10  | 180        | 8.11 | 2.536 | 0.189        | 490       | 3.58 | 3.120 | 0.141    | 0.24  | -4.99  | -4.06  | -19.20  | 389.34 | 0.001 |
| 26) Relatives think I should vaccinate*                    | 0   | 10  | 160        | 6.57 | 3.097 | 0.245        | 532       | 2.92 | 2.879 | 0.125    | 0.264 | -4.163 | -3.125 | -13.790 | 690.00 | 0.001 |
| <b>4. Influenza perceptions</b>                            |     |     |            |      |       |              |           |      |       |          |       |        |        |         |        |       |
| 20) Vulnerability to influenza                             | 0   | 10  | 192        | 6.53 | 3.020 | 0.218        | 613       | 3.20 | 2.720 | 0.110    | 0.231 | -3.784 | -2.877 | -14.410 | 803.00 | 0.001 |
| 21) Susceptibility to influenza                            | 0   | 10  | 192        | 4.24 | 3.160 | 0.228        | 613       | 3.33 | 2.917 | 0.118    | 0.246 | -1.390 | -0.424 | -3.683  | 803.00 | 0.001 |
| 23) Likelihood of influenza                                | 0   | 10  | 192        | 4.51 | 3.018 | 0.218        | 613       | 2.12 | 2.424 | 0.098    | 0.239 | -2.855 | -1.914 | -9.984  | 272.52 | 0.001 |
| 17) Severity of influenza (bed days)                       | 1   | 6   | 192        | 3.19 | 1.153 | 0.083        | 613       | 3.03 | 1.110 | 0.045    | 0.093 | -0.340 | 0.023  | -1.710  | 803.00 | 0.1   |
| 18) Severity of influenza                                  | 0   | 10  | 192        | 7.24 | 2.628 | 0.190        | 613       | 5.34 | 2.782 | 0.112    | 0.227 | -2.344 | -1.453 | -8.359  | 803.00 | 0.001 |
| 16) Fear of influenza                                      | 0   | 10  | 192        | 4.44 | 3.442 | 0.248        | 613       | 2.91 | 2.819 | 0.114    | 0.273 | -2.072 | -0.996 | -5.613  | 275.89 | 0.001 |
| 27) Worry of transmitting influenza                        | 0   | 10  | 192        | 6.81 | 2.780 | 0.201        | 613       | 4.95 | 2.925 | 0.118    | 0.239 | -2.327 | -1.389 | -7.771  | 803.00 | 0.001 |
| 22) Perceived control (over influenza)                     | 0   | 10  | 192        | 3.02 | 2.982 | 0.215        | 613       | 4.89 | 2.899 | 0.117    | 0.241 | 1.400  | 2.347  | 7.761   | 803.00 | 0.001 |
| 29) Anticipated regret of not vaccinating                  | 0   | 10  | 192        | 8.22 | 2.562 | 0.185        | 613       | 7.44 | 2.572 | 0.104    | 0.212 | -1.197 | -0.363 | -3.672  | 803.00 | 0.001 |
| <b>5. Influenza vaccine perceptions</b>                    |     |     |            |      |       |              |           |      |       |          |       |        |        |         |        |       |
| 24) Perceived knowledge of vaccine (informed decisions)*   | 0   | 10  | 192        | 7.86 | 2.186 | 0.158        | 613       | 6.44 | 2.637 | 0.106    | 0.190 | -1.803 | -1.055 | -7.508  | 380.14 | 0.001 |
| 19) Vaccine effectiveness                                  | 0   | 10  | 192        | 7.25 | 2.281 | 0.165        | 613       | 4.52 | 2.840 | 0.115    | 0.201 | -3.121 | -2.332 | -13.588 | 392.51 | 0.001 |
| 30) The vaccine is painful*                                | 0   | 10  | 190        | 1.68 | 2.678 | 0.194        | 449       | 2.59 | 2.649 | 0.125    | 0.231 | 0.454  | 1.363  | 3.931   | 352.50 | 0.001 |
| 31) The vaccine could transmit influenza                   | 0   | 10  | 192        | 2.98 | 2.970 | 0.214        | 613       | 4.46 | 3.063 | 0.124    | 0.251 | 0.977  | 1.964  | 5.848   | 803.00 | 0.001 |
| 32) Vaccine contents could be dangerous                    | 0   | 10  | 192        | 2.99 | 3.077 | 0.222        | 613       | 5.14 | 3.316 | 0.134    | 0.270 | 1.621  | 2.680  | 7.976   | 803.00 | 0.001 |
| 33) Vaccine-related self-efficacy                          | 0   | 10  | 192        | 8.04 | 2.561 | 0.185        | 613       | 3.92 | 3.214 | 0.130    | 0.226 | -4.559 | -3.671 | -18.218 | 395.86 | 0.001 |

| Explanatory variables                                      | Min | Max | Vaccinated |      |       | Unvaccinated |        |      | SE    | 95% C.I. |       | t / $\chi^2$ | df     | p <    |        |       |
|------------------------------------------------------------|-----|-----|------------|------|-------|--------------|--------|------|-------|----------|-------|--------------|--------|--------|--------|-------|
|                                                            |     |     | N          | Mean | SD    | SE           | N      | Mean |       | SD       | SE    |              |        |        | Lower  | Upper |
| <b>6. Trust toward vaccination and stakeholders</b>        |     |     |            |      |       |              |        |      |       |          |       |              |        |        |        |       |
| 12) Trust physician (scale)                                | 0   | 7   | 192        | 4.97 | 1.447 | 0.104        | 613    | 4.39 | 1.483 | 0.060    | 0.122 | -0.820       | -0.341 | -4.761 | 803.00 | 0.001 |
| 13) Trust in vaccine manufacturers                         | 0   | 10  | 192        | 6.18 | 2.345 | 0.169        | 613    | 4.82 | 2.553 | 0.103    | 0.207 | -1.763       | -0.950 | -6.548 | 803.00 | 0.001 |
| 14) Trust in the NHS                                       | 0   | 10  | 192        | 6.29 | 2.537 | 0.183        | 613    | 5.44 | 2.461 | 0.099    | 0.205 | -1.250       | -0.445 | -4.135 | 803.00 | 0.001 |
| <b>7. Shared decision-making and childhood experiences</b> |     |     |            |      |       |              |        |      |       |          |       |              |        |        |        |       |
| 11) Shared decision-making – physician                     | 1   | 5   | 192        | 2.49 | 2.557 | 0.106        | 613    | 2.90 | 0.962 | 0.039    | 0.071 | -0.077       | 0.204  | 0.890  | 364.72 | 0.99  |
| 15) Bad experience with vaccines (child)                   | 0   | 1   | 192/20     | -    | -     | -            | 613/96 | -    | -     | -        | -     | -            | -      | 3.260  | 1.000  | 0.1   |
| 15) Scary health experience (child)                        | 0   | 1   | 192/31     | -    | -     | -            | 613/34 | -    | -     | -        | -     | -            | -      | 22.129 | 1.000  | 0.001 |

C.I. = confidence interval; df = degrees of freedom; HCP = healthcare professional; MH = Ministry of Health; p = p-value; SD = standard deviation; SE = standard error. df with decimals are adjusted to correct for the violation of the assumption of equal variances (Levene's Test for Equality of Variances was statistically significant). p-values were obtained using Chi-square tests ( $\chi^2$ ) for categorical variables and Independent t-tests (t) for interval or continuous variables. p < 0.05 was considered statistically significant. \*Variables with "I do not know" responses which were dichotomised for regression analysis. In brackets is the number of the question corresponding to each explanatory variable (see Table S1).

STROBE Statement—Checklist of items that should be included in reports of *cross-sectional studies*

|                              | Item No | Recommendation                                                                                                                                                                                                                                                                                                                                                                                                                                                                     |
|------------------------------|---------|------------------------------------------------------------------------------------------------------------------------------------------------------------------------------------------------------------------------------------------------------------------------------------------------------------------------------------------------------------------------------------------------------------------------------------------------------------------------------------|
| <b>Title and abstract</b>    | 1       | (a) Indicate the study's design with a commonly used term in the title or the abstract [Page 1]<br>(b) Provide in the abstract an informative and balanced summary of what was done and what was found [Page 2]                                                                                                                                                                                                                                                                    |
| <b>Introduction</b>          |         |                                                                                                                                                                                                                                                                                                                                                                                                                                                                                    |
| Background/rationale         | 2       | Explain the scientific background and rationale for the investigation being reported [Pages 4-5]                                                                                                                                                                                                                                                                                                                                                                                   |
| Objectives                   | 3       | State specific objectives, including any prespecified hypotheses [Page 5]                                                                                                                                                                                                                                                                                                                                                                                                          |
| <b>Methods</b>               |         |                                                                                                                                                                                                                                                                                                                                                                                                                                                                                    |
| Study design                 | 4       | Present key elements of study design early in the paper [Pages 6-9]                                                                                                                                                                                                                                                                                                                                                                                                                |
| Setting                      | 5       | Describe the setting, locations, and relevant dates, including periods of recruitment, exposure, follow-up, and data collection [Page 6]                                                                                                                                                                                                                                                                                                                                           |
| Participants                 | 6       | (a) Give the eligibility criteria, and the sources and methods of selection of participants [Pages 6 and 11]                                                                                                                                                                                                                                                                                                                                                                       |
| Variables                    | 7       | Clearly define all outcomes, exposures, predictors, potential confounders, and effect modifiers. Give diagnostic criteria, if applicable [Pages 7-8 and Table S1 in Supplementary material]                                                                                                                                                                                                                                                                                        |
| Data sources/<br>measurement | 8*      | For each variable of interest, give sources of data and details of methods of assessment (measurement). Describe comparability of assessment methods if there is more than one group [Page 7 and Table S1 in Supplementary material]                                                                                                                                                                                                                                               |
| Bias                         | 9       | Describe any efforts to address potential sources of bias [Pages 6-8]                                                                                                                                                                                                                                                                                                                                                                                                              |
| Study size                   | 10      | Explain how the study size was arrived at [Page 6]                                                                                                                                                                                                                                                                                                                                                                                                                                 |
| Quantitative variables       | 11      | Explain how quantitative variables were handled in the analyses. If applicable, describe which groupings were chosen and why [Pages 8-9]                                                                                                                                                                                                                                                                                                                                           |
| Statistical methods          | 12      | (a) Describe all statistical methods, including those used to control for confounding [Pages 7-9]<br>(b) Describe any methods used to examine subgroups and interactions [Pages 8-9]<br>(c) Explain how missing data were addressed [Page 8]<br>(d) If applicable, describe analytical methods taking account of sampling strategy [N/A]<br>(e) Describe any sensitivity analyses [Page 8]                                                                                         |
| <b>Results</b>               |         |                                                                                                                                                                                                                                                                                                                                                                                                                                                                                    |
| Participants                 | 13*     | (a) Report numbers of individuals at each stage of study—eg numbers potentially eligible, examined for eligibility, confirmed eligible, included in the study, completing follow-up, and analysed [Page 9 and Figures S1a-S3a and S1b-S3b in Supplementary material]<br>(b) Give reasons for non-participation at each stage [Figures S1a-S3a and S1b-S3b in Supplementary material]<br>(c) Consider use of a flow diagram [Figures S1a-S3a and S1b-S3b in Supplementary material] |
| Descriptive data             | 14*     | (a) Give characteristics of study participants (eg demographic, clinical, social) and information on exposures and potential confounders [Table 1 and Tables S2-S4 in Supplementary material]<br>(b) Indicate number of participants with missing data for each variable of interest                                                                                                                                                                                               |

[Tables S2-S4 in Supplementary material]

|                          |     |                                                                                                                                                                                                                                                                                                                                                                                                                                                           |
|--------------------------|-----|-----------------------------------------------------------------------------------------------------------------------------------------------------------------------------------------------------------------------------------------------------------------------------------------------------------------------------------------------------------------------------------------------------------------------------------------------------------|
| Outcome data             | 15* | Report numbers of outcome events or summary measures [Tables S2-S4 in Supplementary material]                                                                                                                                                                                                                                                                                                                                                             |
| Main results             | 16  | (a) Give unadjusted estimates and, if applicable, confounder-adjusted estimates and their precision (eg, 95% confidence interval). Make clear which confounders were adjusted for and why they were included [Pages 11-12 and Tables 2-4]<br>(b) Report category boundaries when continuous variables were categorized [Page 8]<br>(c) If relevant, consider translating estimates of relative risk into absolute risk for a meaningful time period [N/A] |
| Other analyses           | 17  | Report other analyses done—eg analyses of subgroups and interactions, and sensitivity analyses [Page 19]                                                                                                                                                                                                                                                                                                                                                  |
| <b>Discussion</b>        |     |                                                                                                                                                                                                                                                                                                                                                                                                                                                           |
| Key results              | 18  | Summarise key results with reference to study objectives [Pages 19, 21-23 and Table 5]                                                                                                                                                                                                                                                                                                                                                                    |
| Limitations              | 19  | Discuss limitations of the study, taking into account sources of potential bias or imprecision. Discuss both direction and magnitude of any potential bias [Pages 25-26]                                                                                                                                                                                                                                                                                  |
| Interpretation           | 20  | Give a cautious overall interpretation of results considering objectives, limitations, multiplicity of analyses, results from similar studies, and other relevant evidence [Pages 19, 21-25]                                                                                                                                                                                                                                                              |
| Generalisability         | 21  | Discuss the generalisability (external validity) of the study results [25]                                                                                                                                                                                                                                                                                                                                                                                |
| <b>Other information</b> |     |                                                                                                                                                                                                                                                                                                                                                                                                                                                           |
| Funding                  | 22  | Give the source of funding and the role of the funders for the present study and, if applicable, for the original study on which the present article is based [27]                                                                                                                                                                                                                                                                                        |

\*Give information separately for exposed and unexposed groups.

**Note:** An Explanation and Elaboration article discusses each checklist item and gives methodological background and published examples of transparent reporting. The STROBE checklist is best used in conjunction with this article (freely available on the Web sites of PLoS Medicine at <http://www.plosmedicine.org/>, Annals of Internal Medicine at <http://www.annals.org/>, and Epidemiology at <http://www.epidem.com/>). Information on the STROBE Initiative is available at [www.strobe-statement.org](http://www.strobe-statement.org).

# BMJ Open

## Evaluating the importance of policy amenable factors in explaining influenza vaccination: a cross-sectional multinational study

|                                 |                                                                                                                                                                                                                                                                        |
|---------------------------------|------------------------------------------------------------------------------------------------------------------------------------------------------------------------------------------------------------------------------------------------------------------------|
| Journal:                        | <i>BMJ Open</i>                                                                                                                                                                                                                                                        |
| Manuscript ID                   | bmjopen-2016-014668.R1                                                                                                                                                                                                                                                 |
| Article Type:                   | Research                                                                                                                                                                                                                                                               |
| Date Submitted by the Author:   | 08-Mar-2017                                                                                                                                                                                                                                                            |
| Complete List of Authors:       | Wheelock, Ana; Imperial College London, Surgery and Cancer<br>Miraldo, Marisa; Imperial College London, Business School<br>Thomson, Angus; Sanofi Pasteur<br>Vincent, Charles; University of Oxford, Experimental Psychology<br>Sevdalis, Nick; King's College London, |
| <b>Primary Subject Heading</b>: | Health policy                                                                                                                                                                                                                                                          |
| Secondary Subject Heading:      | Public health, Infectious diseases, Patient-centred medicine                                                                                                                                                                                                           |
| Keywords:                       | Influenza, Vaccine, Adult, Beliefs, Perceptions, Behaviour                                                                                                                                                                                                             |
|                                 |                                                                                                                                                                                                                                                                        |

SCHOLARONE™  
Manuscripts

1  
2  
3 **EVALUATING THE IMPORTANCE OF POLICY AMENABLE FACTORS IN**  
4 **EXPLAINING INFLUENZA VACCINATION: A CROSS-SECTIONAL**  
5 **MULTINATIONAL STUDY**  
6  
7

8  
9 Ana Wheelock, PhD<sup>1†</sup>; Marisa Miraldo, PhD<sup>2</sup>; Angus Thomson, PhD<sup>3</sup>; Charles Vincent,  
10 PhD<sup>4</sup>; Nick Sevdalis, PhD<sup>5</sup>  
11  
12

13  
14 <sup>1</sup>Faculty of Medicine, Imperial College London, London, UK; <sup>2</sup>Imperial College Business  
15 School, London, UK; <sup>3</sup>Sanofi Pasteur, Lyon, France; <sup>4</sup>Department of Experimental  
16 Psychology, University of Oxford, Oxford, UK; <sup>5</sup>Centre for Implementation Science, Health  
17 Service and Population Research Department, King's College London, London, UK  
18  
19  
20  
21

22  
23 **CORRESPONDING AUTHOR AND ADDRESS**

24 Ana Wheelock  
25  
26 Imperial College London  
27  
28 Faculty of Medicine, Medical School Building  
29  
30 St Mary's Campus, Norfolk Place  
31  
32 London W2 1PG, United Kingdom  
33  
34 Tel. 0044 207 594 3433. Email: [a.wheelock@imperial.ac.uk](mailto:a.wheelock@imperial.ac.uk)  
35

36  
37 Word count: 5,986  
38

39  
40 Keywords – Influenza, vaccine, adult, beliefs, perceptions, behaviour  
41

42  
43 The Corresponding Author has the right to grant on behalf of all authors and does grant on  
44 behalf of all authors, an exclusive licence (or non exclusive for government employees) on a  
45 worldwide basis to the BMJ Publishing Group Ltd and its Licensees to permit this article (if  
46 accepted) to be published in BMJ editions and any other BMJ PGL products and sublicences  
47 to exploit all subsidiary rights, as set out in their licence  
48  
49

50  
51 (<http://resources.bmj.com/bmj/authors/checklists-forms/licence-for-publication>).  
52  
53  
54  
55  
56  
57  
58  
59  
60



## ABSTRACT

**Objectives:** Despite continuous efforts to improve influenza vaccination coverage, uptake among high-risk groups remains suboptimal. We aimed to identify policy amenable factors associated with vaccination and to measure their importance in order to assist in the monitoring of vaccination sentiment and the design of communication strategies and interventions to improve vaccination rates.

**Setting:** The US, the UK and France.

**Participants:** A total of 2,412 participants were surveyed across the three countries.

**Outcome measures:** Self-reported influenza vaccination.

**Methods:** Between March and April 2014, a stratified random sampling strategy was employed with the aim of obtaining nationally representative samples in the US, the UK and France through online databases and random-digit dialling. Participants were asked about vaccination practices, perceptions and feelings. Multivariable logistic regression was used to identify factors associated with past influenza vaccination.

**Results:** The models were able to explain 64-80% of the variance in vaccination behaviour. Overall, socio-psychological variables, which are inherently amenable to policy, were better at explaining past vaccination behaviour than demographic, socio-economic and health variables. Explanatory variables included social influence (physician), influenza and vaccine risk perceptions and traumatic childhood experiences.

**Conclusions:** Our results indicate that evidence-based socio-psychological items should be considered for inclusion into national immunisation surveys to gauge the public's views, identify emerging concerns, and thus proactively and opportunistically address potential barriers and harness vaccination drivers.

## ARTICLE SUMMARY

### Strengths and limitations of this study

- We generated regression models comprised of a broad set of variables, most of which have been linked to vaccination behaviour.
- We also aimed to use representative samples of the population of interest in three different developed countries (the US, the UK and France).
- The employed survey measures concerned the individual and conditioned perceptions on their vaccination status.
- Our research may have suffered from respondent-related biases. For example, people for whom vaccination issues are particularly salient may have been more prone to participate.

## BACKGROUND

Upper respiratory tract infections are a leading cause of mortality and morbidity in high-income countries, mostly among adults<sup>1</sup>. Influenza is a major contributor to this burden of disease; estimates show that up to 49,000 people die every year in the US<sup>2</sup> and 40,000 in the European Union<sup>3</sup> from influenza-related illness.

In most developed economies, an annual influenza vaccine is recommended and offered free of charge to those at higher risk of death from influenza complications, including pregnant women, individuals with eligible chronic illnesses and people aged 65 years and older. The vaccine is also available at a cost – usually in pharmacies or private healthcare facilities – to those who do not belong to a risk-group, but wish to protect themselves. In the US, for example, where the vaccine is recommended to all adults, approximately one third of healthy adults under 65 years old vaccinate against influenza every year<sup>4</sup>.

Despite continuous efforts to improve influenza vaccination coverage, uptake among high-risk groups remains low. In 2013/2014, for example, 65% of older adults ( $\geq 65$ s) and 46% of younger adults with eligible health conditions were vaccinated against influenza in the US<sup>4</sup>. In the same season, vaccination rates in the UK, one of the highest in Europe, were 73% in  $\geq 65$ s and 53% in eligible under 65s, both below the minimum 75% coverage recommended by the World Health Organisation<sup>5,6</sup>. Worryingly, a 151% rise in excess winter deaths in England and Wales in 2014/15, partly attributed to the circulation of a mutated A(H3N2) influenza strain which made the vaccine significantly less effective<sup>7</sup>, alongside unseasonable warm weather in 2015/2016, resulted in the lowest vaccination uptake in more than a decade<sup>8</sup>.

Vaccination decisions are shaped by a myriad factors, including demographic, socio-economic and socio-psychological factors<sup>9-12</sup>. The latter are of particular interest, given that they are inherently amenable to policy and interventions to change behaviour. Yet, few countries routinely collect data on people's beliefs and perceptions towards vaccination, and those that do often use one open question (e.g. "Why didn't you get a flu shot last winter?")<sup>13</sup>. Although cheaper and easier to administer, this form of enquiry does not take into account people's tendency to fall back on readily available information (e.g. the first thought that comes to mind) or report post-decisional rationalisations of their behaviours (e.g. "I did not

1  
2  
3 vaccinate, hence it must not be necessary”) rather than actual drivers<sup>14,15</sup>. Moreover, these  
4 data do not allow comparative analyses between vaccinated and unvaccinated people.  
5  
6

7  
8 Multilateral efforts to measure and improve confidence in vaccines are gathering pace<sup>16,17</sup>,  
9 yet they are built upon a body of evidence which, although extensive and insightful, has a  
10 number of gaps. One key limitation is that many studies evaluating the link between socio-  
11 psychological factors and influenza vaccination do not use multivariable analysis, thus the  
12 importance of a given variable in relation to others often remains unknown. Studies that do  
13 employ multivariable analysis seldom perform (or report) robustness checks and usually  
14 comprise a limited number of variables, which can result in omitted-variable bias, whereby  
15 the model compensates for the missing variables by over or underestimating the effect of the  
16 included variables<sup>9,18-19</sup>. For example, omitted-variable bias could explain why the model  
17 developed by Weinstein et al. – comprised of seven variables – showed that anticipated regret  
18 of not vaccinating was more important than other established influenza perceptions or why  
19 they did not find an association between vaccine effectiveness and vaccination uptake in this  
20 US sample<sup>18</sup>. Moreover, these studies frequently include proxies of vaccination uptake such  
21 as historical vaccination or intention to vaccinate as independent variables<sup>9,19,20</sup>, thereby  
22 artificially boosting the explanatory ability of the model – because most people who  
23 vaccinate against influenza do so periodically – without necessarily explaining vaccination  
24 behaviour (e.g. people vaccinate because they feel vulnerable and/or receive a reminder from  
25 their GP every winter). As Brewer and colleagues note, other important methodological  
26 shortcomings are the prevalent use of weak survey measures (e.g. generic risk perceptions  
27 rather than own perceived risk) and small convenience samples, which may affect the validity  
28 and generalisability of findings<sup>11</sup>. A related drawback is that most of the evidence in this area  
29 is produced in the US, thus important contextual issues remain unexplored. Furthermore,  
30 vaccination coverage and factors underpinning uptake among healthy adults are often  
31 unknown.  
32  
33  
34  
35  
36  
37  
38  
39  
40  
41  
42  
43  
44  
45  
46  
47  
48

49 We sought to address these limitations by generating regression models comprised of a broad  
50 set of variables, most of which have been linked to vaccination behaviour, by employing  
51 measures that gauge individuals’ own perceived risk (e.g. “The flu could make *me* severely  
52 ill”) and condition their perceptions upon having or not having received the vaccine (e.g.  
53 “*With no flu vaccine*, I would feel very vulnerable to the flu”)<sup>11</sup>, and aiming to use  
54 representative samples of the population of interest in three different developed countries: the  
55  
56  
57  
58  
59  
60

1  
2  
3 US, the UK and France. In order to assist in the monitoring of vaccination sentiment and the  
4 prioritisation and design of communication strategies and interventions to increase influenza  
5 vaccination across different contexts, this study aimed to answer three research questions: (1)  
6  
7 What are the variables that consistently explain recent influenza vaccination uptake? (2)  
8  
9 What is the importance of policy amenable factors in relation to demographic, socio-  
10 economic and health characteristics in explaining past vaccination behaviour? (3) Are the  
11 factors associated with influenza vaccination comparable across countries?  
12  
13  
14

## 15 16 **METHODS**

### 17 18 **Study sample**

19  
20 Using stratified random sampling, we aimed to survey nationally representative adult samples  
21 from the US, the UK and France, about vaccination between March and April of 2014.  
22  
23 Interlocking quotas based on gender, age and income were set. In addition, to ensure national  
24 representativeness, regional, settlement type (rural / urban) and ethnicity non-interlocking  
25 quotas were put in place.  
26  
27  
28  
29  
30

31  
32 Since some of the included variables had not been previously tested and others were not  
33 consistently correlated with vaccination in previous studies, we assumed that the correlation  
34 coefficient between dependent and independent variables was 0.1 (a small effect size), the  
35 minimum sample was calculated to be 782 subjects per country ( $\alpha=0.05$ ;  $1-\beta=80\%$ ) with  
36 PASS version 11.  
37  
38  
39  
40

41  
42 The American Institutes for Research (US) and the Imperial College Research Ethics  
43 Committee (UK) granted research ethics approval. The French *Commission nationale de*  
44 *l'informatique et des libertés* and *Comités de protection des personnes* granted waivers to  
45 approval. Participants were informed about the nature of the study and provided consent.  
46  
47  
48  
49

### 50 51 **Procedure**

52  
53 A market research company (Double Helix) was responsible for piloting, programming the  
54 online survey and conducting the telephone interviews. Ten pilot interviews (seven face-to-  
55 face and three telephone interviews) were conducted with purposively selected participants in  
56  
57  
58  
59  
60

1  
2  
3 the UK to test the survey's face and content validity, and ease of completion. Additionally, 10  
4 pilot interviews were conducted over the phone in the US and 10 in France with the aid of a  
5 screen sharing platform. Interviews were conducted by a trained researcher while the rest of  
6 the team observed via live broadcast. The pilot showed the survey was easy to complete and  
7 understand, and lasted approximately 20 minutes. The refinements to the study materials  
8 were related to wording and format. Self-completion online surveys were then sent to a non-  
9 probability online panel and random-digit dialling was employed to recruit a proportion of  
10 the 65+ age category and those belonging to D/E socio-economic groups, due to their limited  
11 access to or lack of familiarity with internet-based applications<sup>21</sup> (see Box S1 in  
12 Supplementary material for more details about non-probability online panels).  
13  
14  
15  
16  
17  
18  
19  
20

21 As a quality control measure, participants classified as 'speeders' (completed the survey in  
22 half of the average length – 16 minutes) and 'flat-liners' (gave homogenous responses and  
23 completed the survey in less than half of the optimum survey length – 20 minutes) were  
24 removed and replaced<sup>22</sup>.  
25  
26  
27  
28

### 29 **Instrument**

30  
31  
32  
33 The measures reported here are a subset of a larger vaccination survey (available from the  
34 authors upon request). Our analyses included 32-34 items (Table S1 in Supplementary  
35 material). We selected socio-psychological items that had been linked to influenza  
36 vaccination based on existing evidence. These comprised adapted constructs from the Health  
37 Belief Model<sup>23</sup> and Protection Motivation Theory<sup>24</sup> – notably, influenza and vaccine risk  
38 perceptions, vaccine effectiveness and self-efficacy<sup>9-12, 25</sup> –, perceived knowledge of the  
39 vaccine<sup>10</sup> and items assessing trust in key vaccination stakeholders<sup>26</sup>. Additional policy  
40 amenable factors which had infrequently been used in the context of vaccination, but were  
41 considered potential explanatory variables, were also tested. These were worry of infecting  
42 other people (if unvaccinated)<sup>27</sup> – a measure aimed at evaluating the extent to which people  
43 vaccinate to protect others –, perceived control over influenza<sup>28, 29</sup>, regret of contracting  
44 influenza<sup>30</sup>, childhood traumatic health experiences<sup>31</sup> – to evaluate their influence on adult  
45 vaccination behaviour – and health decision-making preferences<sup>32, 33</sup> – to further explore the  
46 effect of the doctor-patient relationship on vaccination acceptance. Participants' socio-  
47 economic, demographic and health characteristics previously associated with influenza  
48 vaccination were prioritised<sup>9, 34</sup>.  
49  
50  
51  
52  
53  
54  
55  
56  
57  
58  
59  
60

1  
2  
3  
4  
5 We used 11-points likert scales (0-10) for the majority of socio-psychological items, as these  
6 are recognised for their reliability and ease of completion<sup>35</sup>, and multiple-choice items and  
7 alternate-choice items when appropriate. Except for trust, health decision-making  
8 preferences, and childhood traumatic health experiences items, socio-psychological measures  
9 were disease or vaccine-specific to avoid misinterpretation. As illustrated in the introduction,  
10 our questions also aimed to capture the respondent's perception of their own personal risk  
11 rather than their views on risk of illness in the wider population. Thus, we asked how likely it  
12 is that they might become ill rather than how likely people generally are to get influenza. We  
13 also wished to specifically focus their attention on the risk of influenza in the presence or  
14 absence of vaccination, as people may feel more or less protected depending upon their  
15 vaccination status. The questions were therefore in the form of 'Without a vaccine, it is likely  
16 I will get the flu' rather than simply assessing their views on the likelihood of getting  
17 influenza. Finally, when thematic hierarchy (e.g. from general to specific) was not important,  
18 items were rotated to minimise response bias.

### 29 30 **Data analysis**

31  
32  
33 We used the following formula to calculate response rates: number of surveys completed  
34 divided by opened emails or interviews attempted minus ineligible individuals. Descriptive  
35 statistics, Pearson's Chi-square and t-tests were computed to explore the relationships  
36 between the assessed variables and self-reported past vaccination behaviour. Point-biserial  
37 correlations were calculated and Chi-square statistics were converted into correlation  
38 coefficients to explore whether the relationship between the dependent and independent  
39 variables matched or exceeded a coefficient of 0,1 – the assumption employed to calculate  
40 the sample size. Cronbach's alpha was used to explore the reliability of the proposed  
41 measures across countries. The outcome measure was receiving an influenza vaccine in the  
42 last 6 months (2013/2014 influenza season).

43  
44  
45 Given that the dependent variable was binary, logistic regression analysis was conducted to  
46 identify the variables associated with past influenza vaccination. Four continuous variables  
47 with "I don't know/not applicable" responses were dichotomised as follows: values  
48 expressing agreement with a given statement (6-10) were coded as 1 = "yes" and the rest (0-5  
49  
50  
51  
52  
53  
54  
55  
56  
57  
58  
59  
60



1  
2  
3 and “I don’t know/not applicable”) were coded as 0 = “other than yes” (see Tables S2-S4 in  
4 Supplementary material).  
5  
6

7  
8 Although a software-based stepwise approach is widely used in logistic regression, in recent  
9 years the purposeful selection of variables has been favoured over deterministic model-  
10 building methods. This is because the latter tend to rely on automatic selection of variables  
11 based only upon mathematical criteria, which can lead to over-fitting or under-fitting models.  
12 Therefore, we used a manual stepwise, hierarchical approach, whereby blocks of variables  
13 were entered in a sequence based upon previous evidence and our aim of assessing the  
14 importance of policy amenable factors in explaining influenza vaccination (see Box S2 in  
15 Supplementary material for a full description of the approach)<sup>36</sup>.  
16  
17  
18  
19  
20  
21

22  
23 Two goodness-of-fit tests – chi-square and Nagelkerke R<sup>2</sup> – were used to assess the overall  
24 model (M1) and each of the 7 models (blocks) generated using the hierarchical approach.  
25 Employing a classification cut-off point of 0.5, a final model with a Nagelkerke R<sup>2</sup> value  
26 close to 1, which indicates optimal model fit, was sought.  
27  
28  
29

30  
31 Thorough checks to ensure the robustness of the models were conducted, including variance  
32 inflation factor (VIF) to assess collinearity, standardised residuals to detect and evaluate  
33 outliers and Cook’s distance to identify influential cases. Separate analyses entering the  
34 blocks of variables in reverse order were also performed (i.e. from block 7 to block 1) to  
35 evaluate whether the order in which variables were entered significantly modified our results.  
36 Data were analysed using IBM SPSS Statistics version 22.  
37  
38  
39  
40  
41

## 42 43 **RESULTS**

### 44 45 **Participants**

46  
47  
48 The online survey was completed by 814 participants in the US, 791 in the UK and 787 in  
49 France. Online response rates were 20-28%, in line with average rates for internet-based  
50 surveys<sup>37</sup>. Eighty participants were interviewed via the telephone in the US, 100 in the UK  
51 and 100 in France. Telephone response rates were 6-9%. Telephone interviews targeted older  
52 people and those belonging to low socio-economic strata, two populations with particularly  
53 low response rates<sup>38</sup>. Recruitment flow diagrams for the online and telephone samples are  
54  
55  
56  
57  
58  
59  
60



1  
2  
3 presented in Figures S1a-S3a and S1b-S3b, respectively (Supplementary material). Except for  
4 education in the US – the sample was more educated than the general population –, there  
5 were no significant differences between the characteristics of the final samples (US=801;  
6 UK=806; France=805; total sample N=2,412) and those of the general population, when  
7 available (Table 1).  
8  
9  
10

11  
12  
13 Healthcare professionals were excluded from the final samples as their decision-making  
14 processes are influenced by those they care for or regulated by healthcare authorities, thus  
15 some of their motivations and concerns may differ from those of the general population<sup>39</sup>.  
16 Subgroup analyses confirmed these differences (available upon request).  
17  
18  
19  
20

### 21 **Differences between vaccinated and non-vaccinated participants**

22  
23

24 Overall, the responses of vaccinated and unvaccinated participants were significantly  
25 different ( $p < 0.05$ - $0.001$ ) and comparable across countries (Tables S2-S4 in Supplementary  
26 material). Those who had received an influenza vaccine were older, reported having an  
27 eligible health condition, had a private or public health insurance, lived with a partner  
28 (US/France), were wealthier (US/France) and more educated (US). They were also less  
29 constrained by practical barriers and more likely to report that their physician and relatives  
30 thought they should vaccinate than those who had not received a vaccine. Vaccinated  
31 participants were more concerned about the risks of influenza, less worried about the risks of  
32 the vaccine and more trusting of vaccine manufacturers and providers than unvaccinated  
33 participants. Vaccinees reported possessing a better understanding of the influenza vaccine  
34 and were more prone to let physicians make decisions about their health (US/UK) than those  
35 who had not vaccinated. Lastly, vaccinated participants were less likely to have had a bad  
36 vaccine or injection-related experience (UK) and more likely to have had a scary health-  
37 related experience in childhood than unvaccinated participants.  
38  
39  
40  
41  
42  
43  
44  
45  
46  
47  
48  
49  
50  
51  
52  
53  
54  
55  
56  
57  
58  
59  
60

**Table 1.** Participant characteristics

| Characteristic                       | Categories                | US (N=801) <sup>1</sup> |                          | UK (N=806) <sup>2</sup> |                          | France (N=805) <sup>3</sup> |                          |
|--------------------------------------|---------------------------|-------------------------|--------------------------|-------------------------|--------------------------|-----------------------------|--------------------------|
|                                      |                           | Sample                  | Population               | Sample                  | Population               | Sample                      | Population               |
| Gender                               | Female                    | 50%                     | 51%                      | 52%                     | 51%                      | 53%                         | 52%                      |
| Age                                  | 18-64                     | 80%                     | 80%                      | 77%                     | 77%                      | 76%                         | 76%                      |
|                                      | ≥65                       | 20%                     | 20%                      | 23%                     | 23%                      | 24%                         | 24%                      |
| Ethnicity                            | White                     | 69%                     | 78%                      | 88%                     | 87%                      | -                           | -                        |
|                                      | Other                     | 30%                     | 22%                      | 11%                     | 13%                      | -                           | -                        |
|                                      | Prefer not to say         | 1%                      | -                        | 1%                      | -                        | -                           | -                        |
| Annual household income <sup>a</sup> | <\$50,000/£20,000/€26,000 | 43%                     | -                        | 46%                     | -                        | 53%                         | -                        |
|                                      | ≥\$50,000/£20,000/€26,000 | 49%                     | -                        | 46%                     | -                        | 34%                         | -                        |
|                                      | Prefer not to say         | 8%                      | -                        | 9%                      | -                        | 13%                         | -                        |
| Marital status                       | Living as a couple        | 60%                     | Unavailable <sup>b</sup> | 56%                     | 58%                      | 54%                         | Unavailable <sup>c</sup> |
|                                      | Not living as a couple    | 39%                     | Unavailable <sup>b</sup> | 44%                     | 42%                      | 45%                         | Unavailable <sup>c</sup> |
|                                      | Prefer not to say         | 1%                      | -                        | 1%                      | -                        | 1%                          | -                        |
| Education                            | No university degree      | 49%                     | 71%                      | 60%                     | 73%                      | 64%                         | 76%                      |
|                                      | University degree         | 45%                     | 29%                      | 37%                     | 27%                      | 29%                         | 24%                      |
|                                      | Prefer not to say         | 5%                      | -                        | 3%                      | -                        | 7%                          | -                        |
| Settlement type                      | Urban                     | 76%                     | 81%                      | 77%                     | 81%                      | 78%                         | 78%                      |
|                                      | Rural                     | 24%                     | 19%                      | 23%                     | 19%                      | 22%                         | 22%                      |
| Vaccination status                   | <65 vaccinated            | 43%                     | 37%                      | 27%                     | Unavailable <sup>d</sup> | 16%                         | Unavailable <sup>e</sup> |
|                                      | ≥65 vaccinated            | 66%                     | 65%                      | 75%                     | 73%                      | 50%                         | 53%                      |

<sup>1</sup>Population estimates for gender, age, ethnicity, income, marital status, education and settlement type are 2012/2013 estimates from the US Census Bureau<sup>40</sup>. Influenza vaccination status is from the 2013/2014 season<sup>4</sup>. <sup>a</sup>The reference income band was the closest to the US 2012/2013 median household income (\$53,046)<sup>40</sup>. <sup>b</sup>Census data only includes persons who are married with spouse present, married with spouse absent and separated (42%).

<sup>2</sup>Population estimates for gender, age, ethnicity, marital status, education and settlement type are 2011 and 2012/2013 estimates from the UK Office for National Statistics<sup>41,42</sup>. Influenza vaccination status is from the 2013/2014 season<sup>5</sup>. <sup>d</sup>Available data for <65s include children. <sup>a</sup>The reference income band was the closest to the UK 2012/2013 median household income (£22,880)<sup>43</sup>.

<sup>3</sup>Population estimates for gender, age, income, marital status, education and settlement type are 2011 and 2012/2013 estimates from France's National Institute of Statistics and Economic Studies<sup>44</sup>. Ethnicity was not collected due to country-specific data protection restrictions. Influenza vaccination status is from the 2013/2014 season<sup>45</sup>. <sup>e</sup>Available data for <65s include children. <sup>a</sup>The reference income band was the closest to France's 2012/2013 median household income (€29,330). <sup>c</sup>Census data only includes people who are legally married (49%).

Note: Differences between samples and populations were evaluated using Fisher's Exact test. Except for education in the US (p<0.001), we found no significant differences. Percentages may not total 100 due to rounding.

## Factors associated with past influenza vaccination in regression analyses

When all variables were assessed concurrently, the models that best fitted the data (M6-M8) explained 73% of the variance in past vaccination behaviour in the US, 80% in the UK and 64% in France (Nagelkerke  $R^2 = 0.644-0.795$ ) (Tables 2-4). The first models (M1) included all the variables, thus were less parsimonious than M6-M8, yet they explained a similar share of the variance (66-80%). When using the hierarchical approach, the first-step models (M2), which included demographic, socio-economic and health variables, fitted the data poorly-to-moderately and accounted for 22% the variance in past vaccination behaviour in the US, 38% in the UK and 19% in France. Practical barriers only explained 3% of the variance in the US (M3) and were not significant in the UK and France. Social influence explained 14% of the variance in the US (M4), 21% in UK and 25% in France (M3). Influenza perceptions accounted for 30% of past vaccination behaviour in the US (M5), 17% in the UK and 18% in France (M4), whereas influenza vaccine perceptions only explained 1% of this behaviour in the US (M6), 2% in the UK and 1% in France (M5). Finally, trust items explained less than 1% of the variance in the US, whilst decision-making preferences and childhood experiences explained 2% of the variance in the UK and 1% in France.

When blocks were entered in reverse order, demographic, socio-economic and health variables contributed little to the variance in past vaccination behaviour – 3% (US), 1% (UK) and 0% (France). This is not surprising, since people's characteristics have an effect on their perceptions, thus they explain some of the same variance. This result further proves that poorly specified models – which are not evidence-based – lead to biased estimates (the detailed results of these analyses are available from the corresponding author upon request).

Robustness checks showed that the variables which were significant in M1, remained significant across most 11-21 specifications, with some exceptions. In the US, “vaccine is painful” became non-significant when non-significant influenza perceptions were removed. This suggests that the latter had a suppressor effect on the former, i.e. their inclusion strengthened the effect of the variable in question<sup>45</sup>. In the UK, gender became significant when non-significant vaccine perceptions were removed, and “vaccine transmits influenza” became significant when “vaccine contents are dangerous” was removed. In both cases, this indicates that the removed variables were confounders of those that became significant<sup>46</sup>. In France, “trust in manufacturers” was a confounder of education – the latter

**Table 2** Factors associated with past influenza vaccination in regression analysis – US

| Variables                               | M1       |       | M2       |       | M3       |       | M4       |       | M5       |       | M6       |       | M7       |       | M8              |       |
|-----------------------------------------|----------|-------|----------|-------|----------|-------|----------|-------|----------|-------|----------|-------|----------|-------|-----------------|-------|
|                                         | OR       | SE    |          |       | OR       | SE    | OR              | SE    |
| Age                                     | 1.019    | 0.458 | 1.369    | 0.271 | 1.210    | 0.275 | 1.116    | 0.292 | 1.230    | 0.396 | 1.006    | 0.443 | 1.093    | 0.441 | 1.057           | 0.446 |
| <b>Eligible health condition</b>        | 2.528**  | 0.329 | 3.050*** | 0.204 | 3.079*** | 0.208 | 2.469*** | 0.222 | 2.145**  | 0.296 | 2.549**  | 0.320 | 2.531**  | 0.320 | <b>2.531**</b>  | 0.323 |
| <b>Private insurance</b>                | 3.463*** | 0.386 | 2.833*** | 0.242 | 2.611*** | 0.246 | 2.197**  | 0.265 | 2.394**  | 0.337 | 3.062**  | 0.367 | 3.269*** | 0.372 | <b>3.374***</b> | 0.377 |
| <b>Public insurance</b>                 | 4.507*** | 0.415 | 3.461*** | 0.258 | 3.143*** | 0.262 | 2.542*** | 0.282 | 3.163*** | 0.362 | 4.137*** | 0.391 | 4.158*** | 0.391 | <b>4.273***</b> | 0.397 |
| Gender                                  | 0.916    | 0.269 | 0.913    | 0.166 | 0.948    | 0.171 | 0.859    | 0.185 | 0.907    | 0.240 | 0.931    | 0.253 | 0.867    | 0.257 | 0.898           | 0.259 |
| Marital status                          | 0.672    | 0.294 | 1.093    | 0.185 | 1.062    | 0.188 | 1.032    | 0.204 | 0.890    | 0.266 | 0.743    | 0.281 | 0.759    | 0.283 | 0.728           | 0.286 |
| <b>Income</b>                           | 1.146*   | 0.074 | 1.198*** | 0.046 | 1.166**  | 0.049 | 1.140**  | 0.052 | 1.145**  | 0.067 | 1.143*   | 0.070 | 1.130*   | 0.070 | <b>1.145*</b>   | 0.070 |
| Education                               | 1.052    | 0.095 | 0.740    | 0.182 | 1.036    | 0.062 | 0.983    | 0.067 | 1.025    | 0.088 | 1.046    | 0.093 | 1.042    | 0.093 | 1.035           | 0.093 |
| Ethnicity                               | 0.664    | 0.287 | 1.369*   | 0.271 | 0.681**  | 0.186 | 0.665**  | 0.202 | 0.681    | 0.254 | 0.677    | 0.266 | 0.695    | 0.270 | 0.693           | 0.271 |
| Vaccine access                          | 1.277    | 0.384 |          |       |          |       |          |       |          |       |          |       |          |       |                 |       |
| <b>Time to vaccinate</b>                | 2.182**  | 0.356 |          |       | 2.804*** | 0.220 | 2.565*** | 0.239 | 2.417**  | 0.303 | 2.194**  | 0.319 | 2.535**  | 0.329 | <b>2.432**</b>  | 0.331 |
| <b>Physician's opinion</b>              | 4.361*** | 0.345 |          |       |          |       | 6.909*** | 0.211 | 2.946*** | 0.276 | 3.700*** | 0.309 | 4.260*** | 0.322 | <b>4.285***</b> | 0.321 |
| Relatives' opinion                      | 0.866    | 0.312 |          |       |          |       |          |       |          |       |          |       |          |       |                 |       |
| <b>Vulnerable to influenza</b>          | 1.335*** | 0.069 |          |       |          |       |          |       | 1.359*** | 0.056 | 1.291*** | 0.059 | 1.284*** | 0.059 | <b>1.290***</b> | 0.060 |
| Susceptible to influenza                | 1.013    | 0.056 |          |       |          |       |          |       |          |       |          |       |          |       |                 |       |
| <b>Likelihood of catching influenza</b> | 1.235*** | 0.060 |          |       |          |       |          |       | 1.238*** | 0.049 | 1.238*** | 0.055 | 1.226*** | 0.056 | <b>1.216***</b> | 0.056 |
| Severity of influenza (bed days)        | 1.121    | 0.126 |          |       |          |       |          |       |          |       |          |       |          |       |                 |       |
| <b>Severity of influenza</b>            | 0.908*   | 0.061 |          |       |          |       |          |       | 0.911*   | 0.051 | 0.902*   | 0.055 | 0.909*   | 0.055 | <b>0.903**</b>  | 0.055 |
| Fear of influenza                       | 0.973    | 0.063 |          |       |          |       |          |       |          |       |          |       |          |       |                 |       |
| Worry of transmitting influenza         | 0.932    | 0.056 |          |       |          |       |          |       |          |       |          |       |          |       |                 |       |
| <b>Perceived control over influenza</b> | 0.752*** | 0.056 |          |       |          |       |          |       | 0.741*** | 0.047 | 0.757*** | 0.052 | 0.748*** | 0.052 | <b>0.744***</b> | 0.052 |
| <b>Regret of catching influenza</b>     | 1.165**  | 0.054 |          |       |          |       |          |       | 1.112**  | 0.043 | 1.117**  | 0.049 | 1.126**  | 0.049 | <b>1.122**</b>  | 0.050 |
| <b>Perceived knowledge of vaccine</b>   | 0.406**  | 0.390 |          |       |          |       |          |       |          |       | 0.368**  | 0.361 | 0.368**  | 0.366 | <b>0.388**</b>  | 0.367 |
| <b>Effectiveness vaccine</b>            | 1.249*** | 0.066 |          |       |          |       |          |       |          |       | 1.188**  | 0.062 | 1.222**  | 0.064 | <b>1.225***</b> | 0.064 |
| <b>Vaccine transmits influenza</b>      | 0.848**  | 0.054 |          |       |          |       |          |       |          |       | 0.827*** | 0.046 | 0.835*** | 0.046 | <b>0.836***</b> | 0.047 |
| Vaccine contents are dangerous          | 0.961    | 0.055 |          |       |          |       |          |       |          |       |          |       |          |       |                 |       |

|                                        |               |              |       |       |       |        |       |                |              |                |              |
|----------------------------------------|---------------|--------------|-------|-------|-------|--------|-------|----------------|--------------|----------------|--------------|
| Vaccine is painful                     | 1.775*        | 0.329        |       |       |       | 1.712* | 0.304 | 1.585          | 0.309        | 1.558          | 0.310        |
| Vaccine-related self-efficacy          | 1.010         | 0.053        |       |       |       |        |       |                |              |                |              |
| <b>Trust in physician (scale)</b>      | <b>0.836*</b> | <b>0.096</b> |       |       |       |        |       | <b>0.796**</b> | <b>0.090</b> | <b>0.809**</b> | <b>0.091</b> |
| Trust in manufacturers                 | 0.895         | 0.081        |       |       |       |        |       |                |              |                |              |
| Trust in health authorities            | 1.013         | 0.086        |       |       |       |        |       |                |              |                |              |
| Shared decision-making doctor          | 0.953         | 0.147        |       |       |       |        |       |                |              |                |              |
| Bad experience vaccines - child        | 1.449         | 0.417        |       |       |       |        |       |                |              |                |              |
| <b>Scary health experience - child</b> | <b>2.126*</b> | <b>0.464</b> |       |       |       |        |       |                |              | <b>2.153*</b>  | <b>0.450</b> |
| Number of participants                 | 724           | 724          | 724   | 724   | 724   | 724    | 724   | 724            | 724          | 724            | 724          |
| Nagelkerke R                           | 0.734         | 0.215        | 0.252 | 0.389 | 0.686 | 0.719  | 0.725 | 0.727          |              |                |              |

OR = Odds ratio; p = p-value; SE = standard error; \*p < 0.1, \*\*p < 0.05, \*\*\*p < 0.001. The change in model fit indicated by chi-square test for each block of variables was always significant (p < 0.1).

**Table 3** Factors associated with past influenza vaccination in regression analysis – UK

| Variables                               | M1       |       | M2       |       | M3       |       | M4       |       | M5       |       | M6              |       |
|-----------------------------------------|----------|-------|----------|-------|----------|-------|----------|-------|----------|-------|-----------------|-------|
|                                         | OR       | SE    | OR              | SE    |
| Age                                     | 2.044    | 0.437 | 6.204*** | 0.238 | 3.560*** | 0.277 | 2.231**  | 0.389 | 1.786    | 0.399 | 1.919           | 0.421 |
| <b>Eligible health condition</b>        | 4.088*** | 0.413 | 8.627*** | 0.226 | 4.002*** | 0.260 | 4.107*** | 0.343 | 4.215*** | 0.368 | <b>4.351***</b> | 0.393 |
| <b>Private insurance</b>                | 3.115**  | 0.472 | 1.864**  | 0.280 | 1.855*   | 0.332 | 2.858**  | 0.412 | 3.227**  | 0.429 | <b>2.871**</b>  | 0.451 |
| <b>Gender</b>                           | 0.629    | 0.321 | 0.611**  | 0.188 | 0.677*   | 0.222 | 0.508**  | 0.286 | 0.475**  | 0.298 | <b>0.580*</b>   | 0.312 |
| <b>Marital status</b>                   | 2.018**  | 0.337 | 1.993*** | 0.207 | 1.795**  | 0.244 | 1.897**  | 0.303 | 1.908**  | 0.314 | <b>1.897**</b>  | 0.323 |
| Income                                  | 0.918    | 0.105 | 0.946    | 0.062 | 0.967    | 0.072 | 0.943    | 0.089 | 0.905    | 0.096 | 0.906           | 0.100 |
| Education                               | 0.962    | 0.103 | 0.979    | 0.061 | 0.966    | 0.072 | 0.981    | 0.089 | 0.947    | 0.094 | 0.976           | 0.098 |
| Ethnicity                               | 1.768    | 0.478 | 0.877    | 0.305 | 1.549    | 0.361 | 1.953    | 0.423 | 1.695    | 0.452 | 1.757           | 0.464 |
| Vaccine access                          | 1.380    | 0.457 |          |       |          |       |          |       |          |       |                 |       |
| Time to vaccinate                       | 1.295    | 0.427 |          |       |          |       |          |       |          |       |                 |       |
| <b>Physician's opinion</b>              | 3.447*** | 0.371 |          |       | 7.751*** | 0.247 | 4.296*** | 0.331 | 2.962**  | 0.347 | <b>3.097**</b>  | 0.359 |
| <b>Relatives' opinion</b>               | 2.205**  | 0.355 |          |       | 3.061*** | 0.245 | 2.193**  | 0.316 | 2.195**  | 0.333 | <b>2.103**</b>  | 0.344 |
| <b>Vulnerable to influenza</b>          | 1.183**  | 0.081 |          |       |          |       | 1.268*** | 0.071 | 1.264**  | 0.075 | <b>1.233**</b>  | 0.076 |
| <b>Susceptible to influenza</b>         | 0.889*   | 0.066 |          |       |          |       | 0.863**  | 0.058 | 0.904*   | 0.061 | <b>0.882**</b>  | 0.063 |
| <b>Likelihood of catching influenza</b> | 1.355*** | 0.078 |          |       |          |       | 1.214**  | 0.063 | 1.298*** | 0.070 | <b>1.311***</b> | 0.073 |
| <b>Severity of influenza (bed days)</b> | 1.317**  | 0.130 |          |       |          |       | 1.295**  | 0.116 | 1.277**  | 0.119 | <b>1.314**</b>  | 0.121 |
| Severity of influenza                   | 1.062    | 0.073 |          |       |          |       |          |       |          |       |                 |       |
| Fear of influenza                       | 0.970    | 0.068 |          |       |          |       |          |       |          |       |                 |       |
| <b>Worry of transmitting influenza</b>  | 0.872**  | 0.066 |          |       |          |       | 0.881**  | 0.059 | 0.865**  | 0.060 | <b>0.870**</b>  | 0.062 |
| <b>Perceived control over influenza</b> | 0.832**  | 0.064 |          |       |          |       | 0.787*** | 0.056 | 0.812*** | 0.058 | <b>0.811***</b> | 0.060 |
| <b>Regret of catching influenza</b>     | 1.324*** | 0.064 |          |       |          |       | 1.348*** | 0.057 | 1.301*** | 0.057 | <b>1.326***</b> | 0.060 |
| <b>Perceived knowledge of vaccine</b>   | 2.098*   | 0.410 |          |       |          |       |          |       | 2.123*   | 0.383 | <b>2.100*</b>   | 0.392 |
| Effectiveness of vaccine                | 1.112    | 0.077 |          |       |          |       |          |       |          |       |                 |       |
| <b>Vaccine transmits influenza</b>      | 0.901    | 0.066 |          |       |          |       |          |       | 0.873**  | 0.051 | <b>0.865**</b>  | 0.055 |
| Vaccine contents are dangerous          | 0.896    | 0.080 |          |       |          |       |          |       |          |       |                 |       |
| Vaccine is painful                      | 1.732    | 0.412 |          |       |          |       |          |       |          |       |                 |       |
| <b>Vaccine-related self-efficacy</b>    | 1.164*   | 0.082 |          |       |          |       |          |       | 1.203**  | 0.072 | <b>1.208**</b>  | 0.076 |

|                                        |         |       |       |       |       |                |       |
|----------------------------------------|---------|-------|-------|-------|-------|----------------|-------|
| Trust in physician (scale)             | 0.899   | 0.107 |       |       |       |                |       |
| Trust in manufacturers                 | 0.868   | 0.088 |       |       |       |                |       |
| Trust in health authorities            | 0.986   | 0.098 |       |       |       |                |       |
| <b>Shared decision-making doctor</b>   | 0.642** | 0.165 |       |       |       | <b>0.675**</b> | 0.158 |
| <b>Bad experience vaccines - child</b> | 0.252** | 0.557 |       |       |       | <b>0.267**</b> | 0.526 |
| <b>Scary health experience - child</b> | 3.434** | 0.496 |       |       |       | <b>3.254**</b> | 0.460 |
| Number of participants                 | 728     | 728   | 728   | 728   | 728   | 728            | 728   |
| Nagelkerke R                           | 0.798   | 0.378 | 0.589 | 0.759 | 0.777 | 0.795          |       |

OR = Odds ratio; p = p-value; SE = standard error; \*p < 0.1, \*\*p < 0.05, \*\*\*p < 0.001. The change in model fit indicated by chi-square test for each block of variables was always significant (p < 0.1).

**Table 4** Factors associated with past influenza vaccination in regression analysis – France

| Variables                               | M1       |       | M2       |       | M3       |       | M4       |       | M5       |       | M6       |       | M7              |       |
|-----------------------------------------|----------|-------|----------|-------|----------|-------|----------|-------|----------|-------|----------|-------|-----------------|-------|
|                                         | OR       | SE    | OR              | SE    |
| <b>Age</b>                              | 2.772**  | 0.342 | 4.544*** | 0.208 | 4.405*** | 0.209 | 2.861*** | 0.246 | 3.312*** | 0.293 | 3.193*** | 0.299 | <b>2.938***</b> | 0.302 |
| Eligible health condition               | 1.196    | 0.332 | 2.142*** | 0.212 | 2.154*** | 0.213 | 1.565*   | 0.248 | 1.173    | 0.295 | 1.215    | 0.300 | 1.087           | 0.309 |
| <b>Private insurance</b>                | 2.423*   | 0.493 | 1.525    | 0.353 | 1.484    | 0.355 | 1.499    | 0.397 | 2.221*   | 0.488 | 2.234    | 0.497 | <b>2.373*</b>   | 0.495 |
| Gender                                  | 1.281    | 0.292 | 0.766    | 0.196 | 0.764    | 0.197 | 0.944    | 0.228 | 1.089    | 0.265 | 1.169    | 0.270 | 1.207           | 0.275 |
| <b>Marital status</b>                   | 1.935**  | 0.316 | 1.236    | 0.216 | 1.245    | 0.216 | 1.251    | 0.246 | 1.872**  | 0.292 | 1.924**  | 0.297 | <b>1.970**</b>  | 0.301 |
| Income                                  | 1.106    | 0.121 | 1.148    | 0.085 | 1.140    | 0.085 | 1.159    | 0.097 | 1.056    | 0.111 | 1.056    | 0.112 | 1.066           | 0.114 |
| <b>Education</b>                        | 1.151    | 0.092 | 1.093    | 0.062 | 1.090    | 0.062 | 1.103    | 0.072 | 1.224*   | 0.086 | 1.201**  | 0.087 | <b>1.179*</b>   | 0.088 |
| Vaccine access                          | 0.501*   | 0.387 |          |       | 1.535*   | 0.252 | 1.211    | 0.283 | 0.849    | 0.333 | 0.726    | 0.338 | 0.650           | 0.343 |
| Time to vaccinate                       | 0.862    | 0.401 |          |       |          |       |          |       |          |       |          |       |                 |       |
| <b>Physician's opinion</b>              | 7.464*** | 0.352 |          |       |          |       | 13.69*** | 0.237 | 7.327*** | 0.275 | 6.904*** | 0.280 | <b>7.161***</b> | 0.288 |
| Relatives' opinion                      | 0.806    | 0.347 |          |       |          |       |          |       |          |       |          |       |                 |       |
| Vulnerable to influenza                 | 1.100    | 0.065 |          |       |          |       |          |       |          |       |          |       |                 |       |
| Susceptible to influenza                | 0.922    | 0.064 |          |       |          |       |          |       |          |       |          |       |                 |       |
| <b>Likelihood of catching influenza</b> | 1.231**  | 0.069 |          |       |          |       |          |       | 1.229*** | 0.053 | 1.252*** | 0.055 | <b>1.243***</b> | 0.056 |
| Severity of influenza (bed days)        | 1.077    | 0.137 |          |       |          |       |          |       |          |       |          |       |                 |       |
| Severity of influenza                   | 0.999    | 0.067 |          |       |          |       |          |       |          |       |          |       |                 |       |
| Fear of influenza                       | 0.986    | 0.058 |          |       |          |       |          |       |          |       |          |       |                 |       |
| Worry of transmitting influenza         | 1.077    | 0.064 |          |       |          |       |          |       |          |       |          |       |                 |       |
| <b>Perceived control over influenza</b> | 0.846**  | 0.054 |          |       |          |       |          |       | 0.812*** | 0.049 | 0.844*** | 0.050 | <b>0.836***</b> | 0.051 |
| <b>Regret of catching influenza</b>     | 1.319*** | 0.063 |          |       |          |       |          |       | 1.388*** | 0.051 | 1.364*** | 0.052 | <b>1.376***</b> | 0.053 |
| Perceived knowledge of vaccine          | 1.319    | 0.356 |          |       |          |       |          |       |          |       |          |       |                 |       |
| Effectiveness of vaccine                | 1.067    | 0.076 |          |       |          |       |          |       |          |       |          |       |                 |       |
| Vaccine transmits influenza             | 0.958    | 0.063 |          |       |          |       |          |       |          |       |          |       |                 |       |
| <b>Vaccine contents are dangerous</b>   | 0.871**  | 0.058 |          |       |          |       |          |       |          |       | 0.868**  | 0.046 | <b>0.852***</b> | 0.047 |
| Vaccine is painful                      | 0.869    | 0.465 |          |       |          |       |          |       |          |       |          |       |                 |       |
| Vaccine-related self-efficacy           | 1.006    | 0.065 |          |       |          |       |          |       |          |       |          |       |                 |       |



|                                        |                 |              |       |       |       |       |                |       |
|----------------------------------------|-----------------|--------------|-------|-------|-------|-------|----------------|-------|
| Trust in physician (scale)             | 1.005           | 0.105        |       |       |       |       |                |       |
| Trust in manufacturers                 | 0.955           | 0.086        |       |       |       |       |                |       |
| Trust in health authorities            | 0.900           | 0.089        |       |       |       |       |                |       |
| Shared decision-making doctor          | 0.997           | 0.164        |       |       |       |       |                |       |
| Bad experience vaccines - child        | 0.854           | 0.448        |       |       |       |       |                |       |
| <b>Scary health experience - child</b> | <b>4.139***</b> | <b>0.447</b> |       |       |       |       | <b>3.804**</b> | 0.429 |
| Number of participants                 | 699             | 699          | 699   | 699   | 699   | 699   | 699            | 699   |
| Nagelkerke R                           | 0.734           | 0.189        | 0.195 | 0.445 | 0.619 | 0.631 | 0.644          |       |

OR = Odds ratio; p = p-value; SE = standard error; \*p < 0.1, \*\*p < 0.05, \*\*\*p < 0.001. The change in model fit indicated by chi-square test for each block of variables was always significant (p < 0.1).

1  
2  
3 became significant in the absence of the former – and “trust in physician” was a suppressor of  
4 “vaccine access” – the latter became non-significant when the former was excluded<sup>46, 47</sup>.

5  
6 Consequently, all the variables that were significant in M1, one non-significant variable that  
7 became significant while performing robustness checks (“vaccine transmits influenza” in the  
8 UK) and all the controls were included in the hierarchical models. The magnitude and  
9 significance of the relationship between independent and dependent variables varied little  
10 between the first models (M1) – where all the variables were entered at the same time – and  
11 the last models (M6-M8) – where a reduced number of variables were entered in blocks –,  
12 which is a further indication of the robustness of our findings. Detailed robustness checks are  
13 not presented here for brevity, but are available from the corresponding author upon request.  
14  
15  
16  
17  
18  
19

20  
21 All the correlation coefficients between the dependent and the independent variables were  
22 higher than 0.1, except for two variables which were tested for the first time in this study:  
23 “Bad experience vaccines – child” ( $r = -0.082$ ,  $p < 0.05$  in the UK;  $r = 0.040$ ,  $p > 0.05$  in the  
24 US; and  $r = -0.064$ ,  $p > 0.05$  in France) and “Scary health experience – child” ( $r = 0.090$ ,  $p <$   
25  $0.05$  in the US (detailed results are available from the corresponding author upon request).  
26  
27  
28  
29

30  
31 Cronbach’s alpha coefficients ranged from acceptable ( $\alpha = 0.65$ ) to excellent ( $\alpha = 0.87$ ) and  
32 they were comparable across countries for each evaluated scale, except for “trust in  
33 vaccination stakeholders”, which was considerably less reliable in France (Table S5 in  
34 Supplementary material). Overall, these results indicate that the scales worked in a similar  
35 manner across the three countries. Further psychometric analyses and scale refinement will  
36 be performed and reported in a separate article.  
37  
38  
39  
40  
41

42  
43 Collinearity diagnostics showed that all variables had VIF values below 5, indicating there is  
44 no cause for concern<sup>48</sup>. Standardised residuals were also examined to identify outliers. Less  
45 than 5% of the cases had standardised residuals above 2 and no more than 1% had absolute  
46 values higher than 3, thus there was no need to eliminate or transform cases<sup>49</sup>. Cook’s  
47 distance statistics were evaluated to identify cases exerting excessive influence on the model.  
48 No values were higher than 1, which shows that no case had to be excluded on that basis<sup>50</sup>.  
49  
50  
51  
52  
53  
54  
55  
56  
57  
58  
59  
60

## DISCUSSION

This study aimed to identify policy amenable factors associated with recent influenza vaccination uptake among adults in three high-income countries and to quantify their impact. Our results support previous findings and add new insights.

The final models robustly explained 64-80% of the variance in past vaccination behaviour and although some predictors were country-specific, we found important commonalities (Table 5). To the best of our knowledge, ours is the first study to demonstrate that socio-psychological variables consistently explain most of the variance in past influenza vaccination behaviour, over and above demographic, socio-economic and health variables (49% vs. 22% in the US, 42% vs. 38% in the UK and 45% vs. 19% in France). Our findings also show that the most important policy amenable factors were social influence, particularly physicians' (US = 14%, UK = 21% and France = 25% of the variance) and perceptions about influenza (US = 30%, UK = 17% and France = 18% of the variance), communication efforts should, therefore, focus on these factors. Surprisingly, perceptions about the influenza vaccine explained a very small proportion of vaccination behaviour across the three countries. Additionally, our results show that a sizeable proportion of healthy adults under the age of 65 years is vaccinating against influenza in the US (over a third) and the UK (under a third), whilst only 16% do so in France.

Specifically, and in line with previous evidence, we found that age, health status, health insurance, income, gender, marital status and education were associated with past vaccination<sup>9,34</sup>. Differences between countries are likely influenced by their healthcare systems and immunisation policies.

For example, having an eligible health condition was more important than age on its own in the US and the UK, whereas the opposite occurred in France. One plausible reason is that a controversy about the effectiveness and safety of the A(H1N1)pdm09 vaccine in 2009/2010, which has had a lasting negative impact on seasonal influenza vaccination rates in France, may have dissuaded some populations – such as younger people with and without eligible

**Table 5.** Survey items associated with past influenza vaccination

| Item                                                                                                                          | US | UK | France |
|-------------------------------------------------------------------------------------------------------------------------------|----|----|--------|
| What is your date of birth?                                                                                                   |    |    | ✓      |
| Have you ever been diagnosed with any of the following (eligible) conditions?                                                 | ✓  | ✓  |        |
| Do you have a private health insurance?                                                                                       | ✓  | ✓  | ✓      |
| Do you have public health insurance (e.g. Medicare)?                                                                          | ✓  |    |        |
| What is your gender?                                                                                                          |    | ✓  |        |
| Which of the following options best describes your current situation (marital status)?                                        |    | ✓  | ✓      |
| What is your combined annual household income?                                                                                | ✓  |    |        |
| What is the highest level of education you have completed?                                                                    |    |    | ✓      |
| Which of the following statements apply to you?                                                                               |    |    |        |
| I can make time to get the flu vaccine                                                                                        | ✓  |    |        |
| My physician thinks I should get a flu vaccine                                                                                | ✓  | ✓  | ✓      |
| My relatives or close friends think I should get a flu vaccine                                                                |    | ✓  |        |
| With no flu vaccine, I would feel very vulnerable to the flu                                                                  | ✓  | ✓  |        |
| If I got the flu, I would feel sicker than other people my age                                                                |    | ✓  |        |
| Without a flu vaccine, I am sure I would get the flu this winter                                                              | ✓  | ✓  | ✓      |
| I believe that if I got the flu I would have to stay in bed for...                                                            |    | ✓  |        |
| The flu could make me severely ill                                                                                            | ✓  |    |        |
| If I don't get the flu vaccine and I get the flu, passing the flu to other people would worry me because it would be my fault |    | ✓  |        |
| I am confident I can avoid getting the flu, even without the flu vaccine                                                      | ✓  | ✓  | ✓      |
| If I don't get a flu vaccine and end up getting the flu this winter, I would regret not getting the vaccine                   | ✓  | ✓  | ✓      |
| I feel I know enough about the flu vaccine to make an informed decision about whether to get vaccinated or not                | ✓  | ✓  |        |
| If I get a flu vaccine, I will be protected against the flu                                                                   | ✓  |    |        |
| The flu vaccine could give me the flu                                                                                         | ✓  | ✓  |        |
| I am worried that some of the contents of the flu vaccine may be dangerous for me                                             |    |    | ✓      |
| I am confident I can get a flu vaccine if I want one                                                                          |    | ✓  |        |
| Which of the following statements best represents how much you trust your physician?                                          | ✓  |    |        |
| How actively do you participate with your physician in making decisions about health, generally?                              |    | ✓  |        |
| Which of these statements best represents your past experiences as a child?                                                   |    |    |        |
| I had a bad experience with vaccines or injections                                                                            |    | ✓  |        |
| I had a scary health-related experience                                                                                       | ✓  | ✓  | ✓      |

See the full list of included items and response categories in Table S1 in Supplementary material. Highlighted items were significant in two (light grey) or three (dark grey) countries.

1  
2  
3  
4 health conditions who may feel less vulnerable – more than others<sup>34, 51</sup>. This controversy may  
5 also be underpinning the differences in model variance and reliability of the trust scale found  
6 between France and the other two countries. Private and public health insurance, and income  
7 were associated with past vaccination in the US, a country with a largely privatised  
8 healthcare system. Although the UK and France have healthcare systems which are free at the  
9 point of delivery or affordable for most, the influenza vaccine is only free of charge for high-  
10 risk groups, which may explain the association between health insurance and past vaccination  
11 in both countries – albeit weak in France. Marital status was also correlated with past  
12 vaccination in the UK and France. Higher vaccination rates among participants living with a  
13 partner may be explained by people’s tendency to protect their significant other or  
14 encouragement from partners to get vaccinated, yet more evidence is needed to substantiate  
15 this assertion. Finally, being male and more educated were positively associated with past  
16 vaccination in the UK and France. Higher vaccination rates among participants living with a  
17 partner may be explained by people’s tendency to protect their significant other or  
18 encouragement from partners to get vaccinated, yet more evidence is needed to substantiate  
19 this assertion. Finally, being male and more educated were positively associated with past  
20 vaccination in the UK and France, respectively. Yet, both characteristics were not robustly  
21 correlated with past vaccination across all specifications, and the association between gender  
22 and vaccination in the UK is weak, thus these findings should be interpreted with caution.  
23 Future research testing our findings across adequately powered samples of high-risk people  
24 will certainly improve our understanding of the relative importance of demographic, socio-  
25 economic and health factors in vaccination decisions among eligible individuals. We  
26 hypothesise that socio-psychological factors are likely to be more pivotal and discriminant  
27 within high-risk groups, as characteristics such as age may be less predictive of vaccination  
28 in samples of over 65s and health status may be less important in samples of younger people  
29 with eligible health conditions.  
30  
31  
32  
33  
34  
35  
36  
37  
38  
39  
40  
41  
42

43 Our results also show that practical barriers were not important, except for time in the US.  
44 This finding suggests that a culture of long working hours and short holidays may indeed  
45 have a negative effect on vaccination uptake.  
46  
47  
48

49 Consistent with previous research, we found that physicians’ opinion (and relatives’ opinion  
50 in the UK), perceived vulnerability to and likelihood of influenza (and severity of influenza  
51 measured in number of bed-days in the UK), perceived vaccine effectiveness (only in the  
52 US), the perception that the vaccine transmits influenza (in the US and UK) or that its  
53 contents are dangerous (France), and perceived vaccine-related self-efficacy (UK) were  
54 associated with vaccine uptake<sup>9-12, 25</sup>. As previously reported in the literature<sup>11</sup>, we also found  
55  
56  
57  
58  
59  
60

1  
2  
3 a small negative association between the perceived severity of influenza and past vaccination  
4 in the US, and no association in the UK and France. A possible explanation is that people  
5 who believe that influenza could make them severely ill, may also be concerned about the  
6 vaccine flu-like symptoms, thus omission bias may induce them to refrain from vaccinating<sup>31</sup>.  
7  
8  
9  
10  
11  
12  
13  
14  
15  
16  
17  
18  
19  
20  
21  
22  
23  
24  
25  
26  
27  
28  
29  
30  
31  
32  
33  
34  
35  
36  
37  
38  
39  
40  
41  
42  
43  
44  
45  
46  
47  
48  
49  
50  
51  
52  
53  
54  
55  
56  
57  
58  
59  
60

a small negative association between the perceived severity of influenza and past vaccination in the US, and no association in the UK and France. A possible explanation is that people who believe that influenza could make them severely ill, may also be concerned about the vaccine flu-like symptoms, thus omission bias may induce them to refrain from vaccinating<sup>31</sup>.<sup>52</sup>. Alternatively, the knowledge that influenza could be serious may not necessarily translate into a feeling of personal threat, particularly among younger individuals. A similar result was the lack of or negative of association between perceived susceptibility to influenza and past vaccination in the US and France, and the UK, respectively. These findings indicate that measuring perceived influenza severity as degree of seriousness (“the flu could make me severely ill”) and perceived susceptibility to influenza as individuals’ constitutional vulnerability in relation to that of others (“If I got the flu, I would feel sicker than other people my age”), does not improve our understanding of vaccination behaviour, as previously suggested<sup>11</sup>.

Interestingly, perceived vaccine knowledge (to make informed decisions) was negatively correlated with past vaccination in the US and positively correlated in the UK. Researchers have long advocated for strategies to increase knowledge about vaccines<sup>10</sup>, yet these results suggest that a cognitive approach may not always be effective, particularly when the target population (e.g. US unvaccinated people) perceive themselves as being knowledgeable, and hence are less likely to seek or be receptive to further information.

Factors which are less explored in the literature were also robustly correlated with past vaccination. Perceived control over influenza and regret of catching it (if unvaccinated) were significantly associated with past vaccination behaviour across the three countries. Worry of infecting other people (if unvaccinated) was only linked to past vaccination in the UK, but the direction of the association was unexpected: unvaccinated participants worried more than vaccinated participants of infecting other people if they were to remain unvaccinated. Although this question was hypothetical, it is plausible that unvaccinated participants felt worried about infecting others because of their actual vaccination status, whereas vaccinated participants did not, either because they felt protected by the vaccine or they do not generally worry about infecting others. In any case, this result does not support the notion that altruism motivates people to vaccinate<sup>27</sup>.

1  
2  
3 Our results also show that trust in key vaccination stakeholders does not play a significant  
4 role in influenza vaccination decisions in these countries. In fact, we found that US vaccinees  
5 were less trusting of their physician than those who did not vaccinate. This finding conflicts  
6 with the premise that all vaccination decisions are a combination of individuals' perceptions  
7 of the information they receive and their trust in those who manufacture, legislate and deliver  
8 vaccines<sup>26</sup>.  
9  
10  
11  
12

13  
14 A striking finding from a qualitative study<sup>31</sup> held true when tested quantitatively. UK  
15 participants who had a bad experience with needles in childhood were less likely to vaccinate  
16 later in life, consistent with evidence showing that traumatic experiences can linger through  
17 to adulthood and significantly influence health decisions<sup>53</sup>. This was further supported by the  
18 increased likelihood of vaccinating exhibited by those who reported a scary health-related  
19 experience in childhood across the three countries, although less so in the US, possibly due to  
20 a lasting perception of vulnerability that resulted in enhanced preventive behaviours in  
21 adulthood. To our knowledge, this is the first quantitative study linking adult vaccination  
22 behaviour with childhood experiences. Therefore, further testing these results across different  
23 samples would be desirable to ensure that the link (or lack thereof) between these variables  
24 and influenza vaccination is a true one. Additionally, future research could unpack this  
25 synergistic effect using qualitative approaches.  
26  
27  
28  
29  
30  
31  
32  
33  
34  
35

36 Finally, we found that UK vaccinees were more likely to let their doctors make decisions  
37 about their health. This finding resonates with findings from Opel and colleagues which  
38 showed that parents were more likely to resist advice if the doctor used a participatory (e.g.  
39 "What do you want to do about shots?") rather than a presumptive initiation approach (e.g.  
40 "Well, we have to do some shots")<sup>54</sup>. Researchers could test the replicability of Opel's study  
41 on adult vaccination and further explore the role of health decision-making preferences on  
42 doctor-patient communication about vaccines.  
43  
44  
45  
46  
47  
48

### 49 **Policy implications**

50  
51  
52  
53 This study offers evidence that can inform policy and practice. Socio-psychological factors  
54 associated with influenza vaccination can be used to track vaccination sentiment and forecast  
55 uptake. These factors are currently not consistently monitored and rarely used as a basis for  
56 effective service delivery and communication strategies. If we are to improve or at least  
57  
58  
59  
60



1  
2  
3 sustain current immunisation rates, we must start actively listening to the public by including  
4 these aspects into national immunisation surveys. An important challenge for policymakers is  
5 prioritising what to monitor and to what extent. As a first step, influenza vaccination  
6 surveillance systems should include the explanatory variables reported here, particularly  
7 those accounting for a significant proportion of the variance in vaccination behaviour (i.e.  
8 social influence and influenza perceptions), and make additions or adjustments over time.  
9  
10  
11  
12

13  
14 More importantly, our findings suggest that socio-psychological factors could provide a  
15 valuable opportunity to develop and evaluate targeted interventions to improve vaccination  
16 coverage. For instance, the influence of physicians' opinions on vaccination, over and above  
17 people's trust in immunisation stakeholders (including physicians themselves), indicates that  
18 improving communications at the practice level should be prioritised. One possible  
19 intervention is to reach under-vaccinated groups (e.g. younger eligible individuals) via  
20 consultations and vaccination reminders, a strategy that has been successful in older  
21 populations<sup>55</sup>. A complementary initiative is to link influenza vaccination rates to pay-for-  
22 performance systems, such as the UK Quality and Outcomes Framework (QoF) which  
23 rewards general practitioners for vaccinating some at-risk groups. Yet, further incentivising  
24 primary care practices to employ more effective approaches to reach out to eligible  
25 unvaccinated patients, may require a stratified strategy that offers larger rewards for  
26 vaccinating sub-groups with low vaccination rates and additional incentives for exceeding  
27 vaccination targets<sup>56</sup>. However, we acknowledge that the implementation of more complex  
28 incentive systems would require additional resources. In the US, programmes to introduce the  
29 influenza vaccine in the work place may encourage those with limited time to protect  
30 themselves.  
31  
32  
33  
34  
35  
36  
37  
38  
39  
40  
41  
42  
43

44 Efforts could also focus on addressing the gap between perceived and real risks of influenza.  
45 This could be achieved by moving away from generic messages about the threat of influenza  
46 (e.g. "influenza is serious") toward tailored messages which take into consideration the needs  
47 and characteristics of different at-risk populations. For instance, influenza-related  
48 complications in young diabetics may differ from those experienced by elderly people.  
49 Specific messages may, therefore, allow individuals and their families to better identify risks  
50 relevant to their condition and, in turn, compel them to vaccinate.  
51  
52  
53  
54  
55  
56  
57  
58  
59  
60



1  
2  
3 Similarly, effective communications as part of the consultation aimed at assuaging concerns  
4 around vaccines could take into account decision-making preferences and individual past  
5 experiences, particularly in the UK. For instance, communication efforts are likely to be  
6 better spent on those who prefer to make decisions about their health independently than those  
7 who are more prone to delegate health decisions to their physician. Given the lasting effect of  
8 some traumatic childhood experiences, interventions and new products aimed at making all  
9 childhood encounters with injections as easy as possible may be a good investment in the  
10 success of vaccination programs in the future.

11  
12  
13 However, in a context of constrained resources, physicians and nursing staff have limited  
14 time and resources to improve vaccination services and communications. Hence, increased  
15 investment in the provision of training, adequate communication materials and decision aids  
16 to enhance patient-doctor communication is urgently needed and much deserved.

17  
18  
19 Messages delivered in primary care settings could also be complemented with evidence-  
20 based mass-communications. For example, a national campaign could combine messages  
21 about the risks of influenza (e.g. likelihood of catching it and feelings of vulnerability and  
22 regret for not vaccinating) with messages about the limited protectiveness of avoidance  
23 strategies (e.g. taking vitamins or evading crowds), and provide – rather than avoid – easy-to-  
24 understand and accurate information about vaccine safety (e.g. communicating more  
25 effectively the difference between vaccine-induced symptoms and actual influenza  
26 symptoms) and effectiveness, particularly in the US. When possible, mass communications  
27 should also be tailored to specific at-risk populations.

28  
29  
30 Finally, given that the influenza vaccine is more effective in healthy working adults<sup>57</sup> –  
31 reducing the number of influenza-like episodes among this population, but also providing  
32 indirect protection to at-risk groups –, knowing what motivates them to vaccinate can be  
33 valuable to policy-makers seeking to reduce the societal cost of influenza.

### 34 35 36 **Limitations**

37  
38  
39 This study has several limitations, some of which may affect the generalisability of our  
40 findings. Although the use of nonprobability online panels has become increasingly  
41 common<sup>58,59</sup>, response rates are generally low<sup>60</sup>. This is because online panel members

1  
2  
3 become desensitised to survey e-mail invitations from the online panel provider<sup>60, 61</sup>.  
4 Additionally, in nonprobability-based samples the relationship between the sample and the  
5 panel population is unknown, so it is not possible to estimate how representative the sample  
6 is of the population as a whole. Thus, our research may have suffered from respondent-  
7 related biases; for example, people for whom vaccination issues are particularly salient may  
8 have been more prone to participate<sup>61</sup>. Consequently, responses may have been more  
9 polarised, both in favour and against of vaccination. Future studies testing our findings using  
10 different sampling strategies, such as the use of probability online panels or random digital  
11 dialling, is warranted. Moreover, given that we prioritised income over education as a  
12 sampling quota, the US sample was more educated than the general population, which in turn  
13 may have affected the generalisability of our findings. Although there is no consensus  
14 regarding the link between education and influenza vaccination in the US<sup>9-10, 12</sup>, it is possible  
15 that the correlation between education and vaccination found in this study may have been due  
16 to an overly educated sample. Further, since we sought to attain nationally representative  
17 samples, they may not have been adequately powered to detect sub-group differences (e.g.  
18 whites vs. non-whites).  
19  
20  
21  
22  
23  
24  
25  
26  
27  
28  
29  
30

31 Another possible drawback is that lengthy instruments may fatigue participants and affect the  
32 quality of the data. Although pilot results indicated that participants did not feel the survey  
33 was long or difficult to complete, there is a chance that those who did not finish the survey  
34 may have found it too lengthy. A related limitation is the dichotomisation of four continuous  
35 variables, which could have resulted in loss of information. However, on balance, this was  
36 deemed necessary to aid the analysis of survey-items with numerous “I don’t know/not  
37 applicable” responses, which are not the same as missing responses. Strategies used to deal  
38 with missing responses, such as imputation or case exclusion, would have been inappropriate  
39 or would have significantly reduced the size of our samples and affected their composition.  
40  
41  
42  
43  
44  
45  
46  
47

48 An additional limitation is the use of a subjective outcome measure. Although data from  
49 medical records may be preferable, previous research comparing the accuracy of the latter to  
50 self-reported influenza vaccination has shown these can coincide in up to 90% of the cases<sup>62</sup>.  
51 Further, since some people vaccinate at work or alternative facilities such as pharmacies, it  
52 remains unclear whether medical records are more accurate than self-reports.  
53  
54  
55  
56  
57  
58  
59  
60

1  
2  
3 Lastly, and consistent with other retrospective cross-sectional studies, causation cannot be  
4 inferred, thus some of the assessed perceptions may have been generated or reinforced by  
5 prior vaccination. Moreover, this study's design precludes any attempt to predict future  
6 behaviours. Future research could test whether the identified explanatory variables  
7 prospectively predict objective outcome measures (i.e. actual vaccination uptake) among  
8 first-time vaccinees.  
9

## 10 11 12 13 14 **CONCLUSIONS**

15  
16  
17  
18 This study identifies policy amenable factors associated with past influenza vaccination and  
19 presents a set of robust explanatory variables that aims to attain a comprehensive and more  
20 accurate understanding of the constellation of factors underpinning vaccination behaviour.  
21 Our findings can prove useful for countries looking to improve vaccination rates by  
22 developing more opportune and effective communication strategies and implementing  
23 evidence-based interventions. Our results highlight the importance of routinely monitoring  
24 vaccination sentiment and using these data to inform immunisation policy.  
25  
26  
27  
28  
29  
30  
31  
32  
33  
34  
35  
36  
37  
38  
39  
40  
41  
42  
43  
44  
45  
46  
47  
48  
49  
50  
51  
52  
53  
54  
55  
56  
57  
58  
59  
60

## COMPETING INTERESTS AND FUNDING

This work was supported by Sanofi Pasteur through a research grant (P40006\_WSSS) and the National Institute for Health Research Imperial Patient Safety Translational Research Centre (PSTRC) (RDPSC 79560), UK. Sevdalis' research is funded by the National Institute for Health Research (NIHR) via the 'Collaboration for Leadership in Applied Health Research and Care South London' at King's College Hospital NHS Foundation Trust, London, UK. Sevdalis also delivers behavioral and safety interventions and training to hospitals internationally on a consultancy basis through London Safety and Training Solutions Ltd. Wheelock and Sevdalis currently have a consultancy agreement as paid scientific advisors in the design of a shingles vaccine survey by Sanofi MSD. Thomson is employed by Sanofi Pasteur. Miraldo and Vincent have nothing to disclose. The views expressed are those of the authors and not necessarily those of the National Health Service, the NIHR, the Department of Health or Sanofi Pasteur.

## ACKNOWLEDGEMENTS

The authors would like to thank the funders of this study and all those who agreed to take part in our research. We are also grateful to Bruno Rigole (Sanofi Pasteur), Rebecca da Cunha, Brian Larkin, Sofia Lombera and Natasha Phillips (Double Helix), and Nicole Huyghe and Kerry O'Neill (solutions-2) for their valuable advice and management support throughout this study.

## AUTHOR CONTRIBUTIONS

AW, MM, AT, CV and NS contributed to the design of the study, the interpretation of the results and write-up of the manuscript. AW led the analysis and drafting of the manuscript. MM provided statistical advice.

## DATA SHARING STATEMENT

No additional data are available.

## REFERENCES

1. GBD 2013 Mortality and Causes of Death Collaborators. Global, regional, and national age–sex specific all-cause and cause-specific mortality for 240 causes of death, 1990–2013: a systematic analysis for the Global Burden of Disease Study 2013. *Lancet* 2013;385(9963):117-171.
2. CDC. Estimates of deaths associated with seasonal influenza - United States, 1976-2007. *MMWR* 2010;59(33):1057.
3. ECDC. Factsheet for the general public.  
[http://ecdc.europa.eu/en/healthtopics/seasonal\\_influenza/basic\\_facts/Pages/factsheet\\_general\\_public.aspx](http://ecdc.europa.eu/en/healthtopics/seasonal_influenza/basic_facts/Pages/factsheet_general_public.aspx). Accessed March 30, 2015.
4. CDC. Seasonal influenza vaccination trends.  
<http://www.cdc.gov/flu/fluview/trends.htm>. Accessed February 1, 2016.
5. PHE. Influenza immunisation programme for England: GP patient groups data collection survey season 2013 to 2014.  
[https://www.gov.uk/government/uploads/system/uploads/attachment\\_data/file/319694/29024\\_94\\_FluVaccineUptake\\_GPPatients2013-14\\_acc.pdf](https://www.gov.uk/government/uploads/system/uploads/attachment_data/file/319694/29024_94_FluVaccineUptake_GPPatients2013-14_acc.pdf). Accessed December 1, 2014.
6. 56th World Health Assembly. *Prevention and Control of Influenza Pandemics and Annual Epidemics*. Geneva, Switzerland; 2003.
7. ONS. Excess Winter Mortality in England and Wales, 2014/15 (Provisional) and 2013/14 (Final).  
<http://webarchive.nationalarchives.gov.uk/20160105160709/http://www.ons.gov.uk/ons/rel/s-ubnational-health2/excess-winter-mortality-in-england-and-wales/2014-15--provisional--and-2013-14--final-/index.html>. Accessed May 30, 2016.
8. PHE. Influenza immunisation programme for England: GP patient groups data collection survey season 2015 to 2016.  
[https://www.gov.uk/government/uploads/system/uploads/attachment\\_data/file/526033/Seasonal\\_flu\\_GP\\_patient\\_groups\\_annual\\_report\\_2015\\_2016.pdf](https://www.gov.uk/government/uploads/system/uploads/attachment_data/file/526033/Seasonal_flu_GP_patient_groups_annual_report_2015_2016.pdf). Accessed May 30, 2016.
9. Chapman GB, Coups EJ. Predictors of influenza vaccine acceptance among healthy adults. *Prev Med* 1999;29(4):249-262.
10. Kohlhammer Y, Schnoor M, Schwartz M, Raspe H, Schäfer T. Determinants of influenza and pneumococcal vaccination in elderly people: a systematic review. *Public Health* 2007;121(10):742-751.

- 1  
2  
3 11. Brewer NT, Chapman GB, Gibbons FX, Gerrard M, McCaul KD, Weinstein ND.  
4 Meta-analysis of the relationship between risk perception and health behavior: the example of  
5 vaccination. *Health Psychol* 2007;26(2):136.  
6
- 7  
8 12. Wheelock A, Thomson A, Sevdalis N. Social and psychological factors underlying  
9 adult vaccination behavior: lessons from seasonal influenza vaccination in the US and the  
10 UK. *Expert Rev Vaccines* 2013:1-9.  
11
- 12  
13 13. CDC. Influenza vaccination and self-reported reasons for not receiving influenza  
14 vaccination among Medicare beneficiaries aged > or =65 years--United States, 1991-2002.  
15 *MMWR* 2004;53(43):1012-5.  
16
- 17  
18 14. Tversky A, Kahneman D. Availability: A heuristic for judging frequency and  
19 probability. *Cognitive Psychol* 1973;5(2):207-232.  
20
- 21  
22 15. Weinstein ND. Misleading tests of health behavior theories. *Ann Behav Med*  
23 2007;33(1):1-10.  
24
- 25  
26 16. NVAC. NVAC Vaccine Hesitancy Working Group Charge.  
27 <http://www.hhs.gov/nvpo/nvac/subgroups/nvac-vaccine-hesitancy-wgcharge.html>. Accessed  
28 February 28, 2014.  
29
- 30  
31 17. Larson HJ, Jarrett C, Schulz WS, Chaudhuri M, Zhou Y, Dube E, et al. Measuring  
32 vaccine hesitancy: The development of a survey tool. *Vaccine* (0).  
33
- 34  
35 18. Weinstein ND, Kwitel A, McCaul KD, Magnan RE, Gerrard M, Gibbons FX. Risk  
36 perceptions: Assessment and relationship to influenza vaccination. *Health Psychol*  
37 2007;26(2):146-151.  
38
- 39  
40 19. Liao Q, Wong WS and Fielding R. Comparison of Different Risk Perception  
41 Measures in Predicting Seasonal Influenza Vaccination among Healthy Chinese Adults in  
42 Hong Kong: A Prospective Longitudinal Study. *PloS one* 2013;8(7):e68019.  
43
- 44  
45 20. Nexøe J, Kragstrup J and Søgaard J. Decision on influenza vaccination among the  
46 elderly: a questionnaire study based on the Health Belief Model and the Multidimensional  
47 Locus of Control Theory. *Scand J Prim Health* 1999;17(2):105-110.  
48
- 49  
50 21. Callegaro M, Baker RP, Bethlehem J, Göritz AS, Krosnick JA, Lavrakas PJ. *Online  
51 Panel Research: A Data Quality Perspective*. John Wiley & Sons; 2014.  
52
- 53  
54 22. Rosenstock IM. Why people use health services. *Milbank Q* 1966;94-127.  
55
- 56  
57 23. Toepoel V, Das M and Van Soest A. Effects of Design in Web Surveys: Comparing  
58 Trained and Fresh Respondents. *Public Opin Quart* 2008;72(5): 985-1007.  
59
- 60  
61 24. Rogers RW. A protection motivation theory of fear appeals and attitude change.  
62 *Journal Psychol* 1975;91(1):93-114.

- 1  
2  
3 25. Liao Q, Cowling BJ, Lam WWT, Fielding R. Factors affecting intention to receive  
4 and self-reported receipt of 2009 pandemic (H1N1) vaccine in Hong Kong: a longitudinal  
5 study. *PLoS one* 2011;6(3):e17713.  
6  
7  
8 26. Larson HJ, Cooper LZ, Eskola J, Katz SL, Ratzan S. Addressing the vaccine  
9 confidence gap. *Lancet* 2011;378(9790):526-535.  
10  
11 27. Wallston KA, Wallston BS, Smith S and Dobbins CJ. Perceived control and health.  
12 *Curr Psychol* 1987;6(1):5-25.  
13  
14 28. Shim E, Chapman GB, Townsend JP and Galvani AP. The influence of altruism on  
15 influenza vaccination decisions. *J R Soc Interface* 2012;9(74): 2234-2243.  
16  
17 29. Lehmann BA, Robert ACR and Gerjo K. A qualitative study of the coverage of  
18 influenza vaccination on Dutch news sites and social media websites. *BMC public health*  
19 2013;121(10):742-751  
20  
21 30. Chapman GB and Coups EJ. Emotions and preventive health behavior: Worry, regret,  
22 and influenza vaccination. *Health Psychol* 2006;25(1):82-90.  
23  
24 31. Wheelock A, Parand A, Rigole B, Thomson A, Miraldo M, Vincent C, et al. Socio-  
25 Psychological Factors Driving Adult Vaccination: A Qualitative Study. *PLoS one* 2014;9(12).  
26  
27 32. Robinson A, Thomson R. Variability in patient preferences for participating in  
28 medical decision making: implication for the use of decision support tools. *Qual Health Care*  
29 2001;10(suppl 1):i34-i38.  
30  
31 33. Safran DG, Kosinski M, Tarlov AR, Rogers WH, Taira DA, Lieberman N and Ware  
32 JE. The Primary Care Assessment Survey: Tests of Data Quality and Measurement  
33 Performance. *Med Care* 1998;36(5):728-739.  
34  
35 34. Caille-Brillet A, Raude J, Lapidus N, De Lamballerie X, Carrat F, Setbon M. Trends  
36 in influenza vaccination behaviours—results from the CoPanFlu cohort, France, 2006 to 2011.  
37 *High Educ* 2013;419(28.9):26.6-31.2.  
38  
39 35. Saris WE and Gallhofer IN. Estimation of the effects of measurement characteristics  
40 on the quality of survey questions. In: Saris WE and Gallhofer IN, eds. *Design, Evaluation,*  
41 *and Analysis of Questionnaires for Survey Research*. Hoboken, NJ: John Wiley & Sons,  
42 2007.  
43  
44 36. Hosmer Jr DW, Lemeshow S. *Applied logistic regression*. John Wiley & Sons; 2004.  
45  
46 37. Nulty DD. The adequacy of response rates to online and paper surveys: what can be  
47 done? *Assess Eval High Educ* 2008;33(3):301-314.  
48  
49 38. Sheldon H, Graham C, Potheary N, Rasul F. Increasing response rates amongst black  
50 and minority ethnic and seldom heard groups. *Picker Institute Europe*, 2007.  
51  
52  
53  
54  
55  
56  
57  
58  
59  
60



- 1  
2  
3 39. Riphagen Dalhuisen J. Predictors of seasonal influenza vaccination among healthcare  
4 workers in hospitals: a descriptive meta-analysis. *Occup Environ Med* 2012;69(4):230.  
5  
6 40. US Census Bureau. *Statistical Abstract of the United States: 2012*. 131st ed.  
7 Washington, DC, 2011. <http://www.census.gov/compendia/statab/>.  
8  
9 41. Office for National Statistics. Annual Mid-year Population Estimates, 2013. Available  
10 from: [http://www.ons.gov.uk/ons/dcp171778\\_367167.pdf](http://www.ons.gov.uk/ons/dcp171778_367167.pdf). Accessed December 1, 2014.  
11  
12 42. Office for National Statistics. 2011 Census: Aggregate data (England and Wales)  
13 [computer file]. UK Data Service Census Support. <http://infuse.mimas.ac.uk>. Accessed  
14 December 1, 2014.  
15  
16 43. Department for Work and Pensions. Households Below Average Income - An  
17 analysis of the income distribution 1994/95 – 2012/13.  
18 [https://www.gov.uk/government/uploads/system/uploads/attachment\\_data/file/325416/house](https://www.gov.uk/government/uploads/system/uploads/attachment_data/file/325416/households-below-average-income-1994-1995-2012-2013.pdf)  
19 holds-below-average-income-1994-1995-2012-2013.pdf. Accessed April 20, 2015.  
20  
21 44. National Institute of Statistics and Economic Studies. Population census 2011.  
22 <http://www.insee.fr/>. Published 2012. Accessed April 15, 2015.  
23  
24 45. ECDC. Seasonal influenza vaccination and antiviral use in Europe – Overview of  
25 vaccination recommendations and coverage rates in the EU Member States for the 2013–14  
26 and 2014–15 influenza seasons. Published 2016. Accessed August 22, 2016.  
27  
28 46. Friedman L & Wall M. Graphical views of suppression and multicollinearity in  
29 multiple linear regression. *Am Stat* 2005;59(2), 127-136.  
30  
31 47. MacKinnon DP, Krull JL & Lockwood CM. Equivalence of the mediation,  
32 confounding and suppression effect. *Prev Sci*, 2000;1(4):173-181.  
33  
34 48. Bowerman BL and O'Connell RT. *Linear statistical models: An applied approach*.  
35 Belmont, CA: Duxbury, 1990.  
36  
37 49. Field A. *Discovering statistics using IBM SPSS statistics*. 4th ed. London: Sage, 2013.  
38  
39 50. Cook RD and Weisberg S. *Residuals and influence in regression*. New York:  
40 Chapman & Hall, 1982.  
41  
42 51. Peretti-Watel P, Raude J, Sagaon-Teyssier L, Constant A, Verger P, Beck F. Attitudes  
43 toward vaccination and the H1N1 vaccine: Poor people's unfounded fears or legitimate  
44 concerns of the elite? *Soc Sci Med* 2014;109:10-18.  
45  
46 52. Ritov I and Baron J. Reluctance to vaccinate: Omission bias and ambiguity. *J Behav*  
47 *Decis Making* 1990;3(4):263-277.  
48  
49  
50  
51  
52  
53  
54  
55  
56  
57  
58  
59  
60



- 1  
2  
3 53. Taddio A, Katz J, Ilersich AL, Koren G. Effect of neonatal circumcision on pain  
4 response during subsequent routine vaccination. *Lancet* 1997;349(9052):599-603.  
5  
6 54. Opel DJ, Heritage J, Taylor JA, Mangione-Smith R, Salas HS, DeVere V, Zhou C and  
7 Robinson JD. The architecture of provider-parent vaccine discussions at health supervision  
8 visits. *Pediatrics* 2013;132(6):1037-1046.  
9  
10 55. Thomas RE, Russell M, Lorenzetti D. Interventions to increase influenza vaccination  
11 rates of those 60 years and older in the community. *Cochrane Database Syst Rev*  
12 2010;8(9):CD005188.  
13  
14 56. Dexter LJ, Teare MD, Dexter M, Siriwardena AN, Read RC. Strategies to increase  
15 influenza vaccination rates: outcomes of a nationwide cross-sectional survey of UK general  
16 practice. *BMJ open* 2012;2(3):e000851.  
17  
18 57. Legrand J, Vergu E, Flahault A. Real-time monitoring of the influenza vaccine field  
19 effectiveness. *Vaccine* 2006;24(44-46):6605-6611.  
20  
21 58. Couper MP. Web surveys: A review of issues and approaches. *Public Opin Q*  
22 2000;64:464-494.  
23  
24 59. Pedersen MJ and Nielsen CV. Improving Survey Response Rates in Online Panels:  
25 Effects of Low-Cost Incentives and Cost-Free Text Appeal Interventions. *Soc Sci Comput*  
26 *Rev* 2014;34:229-243.  
27  
28 60. Tourangeau R, Groves RM, Kennedy C and Yan T. The presentation of a web survey,  
29 nonresponse and measurement error among members of web panel. *J Off Stat* 2009;25:299-  
30 321.  
31  
32 61. Keusch F. The role of topic interest and topic salience in online panel web surveys.  
33 *Int J Market Res* 2013;55:58-80.  
34  
35 62. Nichol K, Korn J, Baum P. Estimation of outpatient risk characteristics and influenza  
36 vaccination status: validation of a self-administered questionnaire. *Am J Prev Med*  
37 1990;7(4):199-203.  
38  
39  
40  
41  
42  
43  
44  
45  
46  
47  
48  
49  
50  
51  
52  
53  
54  
55  
56  
57  
58  
59  
60

## SUPPLEMENTARY MATERIAL

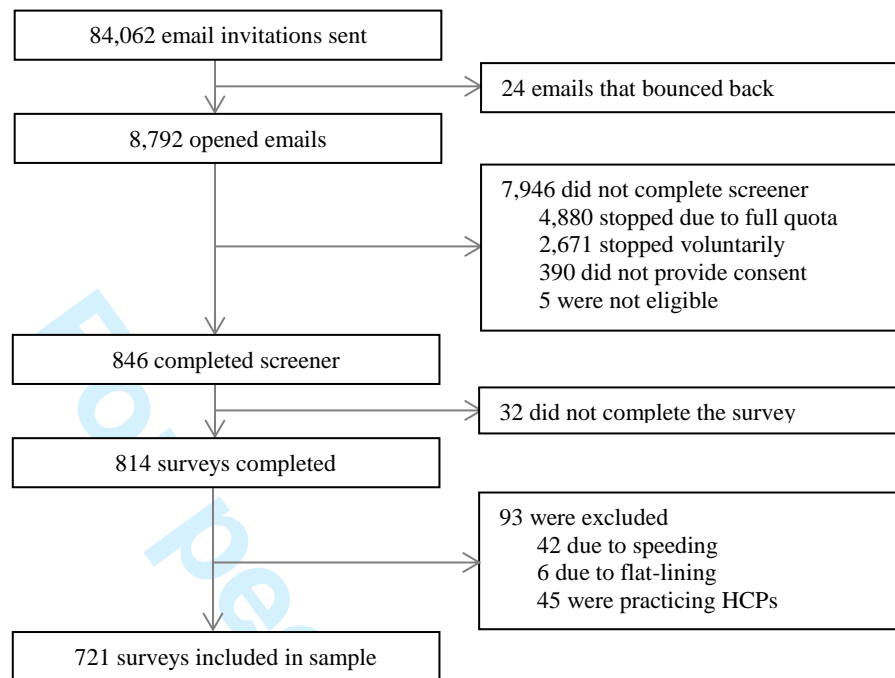

**Figure S1a.** Online sample recruitment flow diagram – US

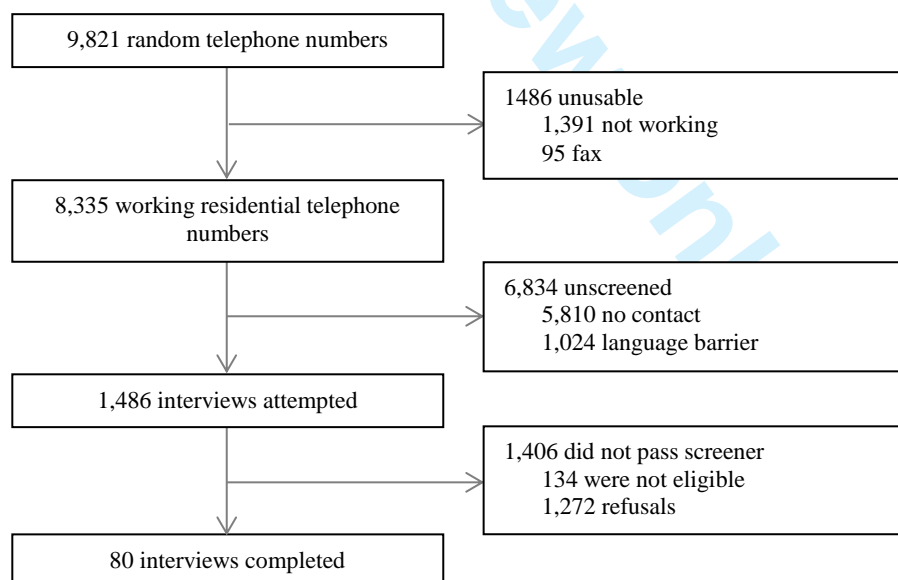

**Figure S1b.** Telephone sample recruitment flow diagram – US

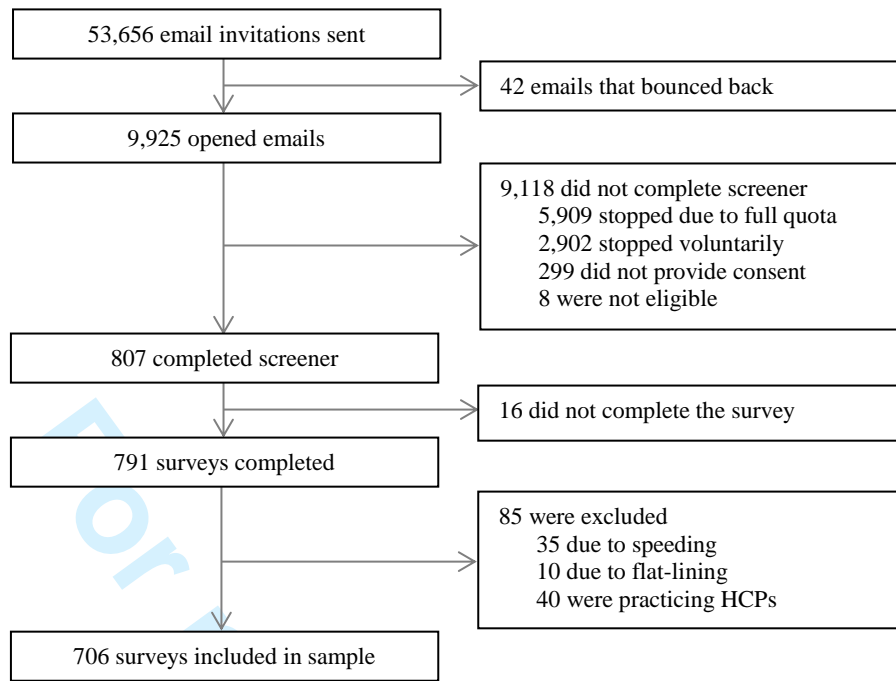

**Figure S2a.** Online sample recruitment flow diagram – UK

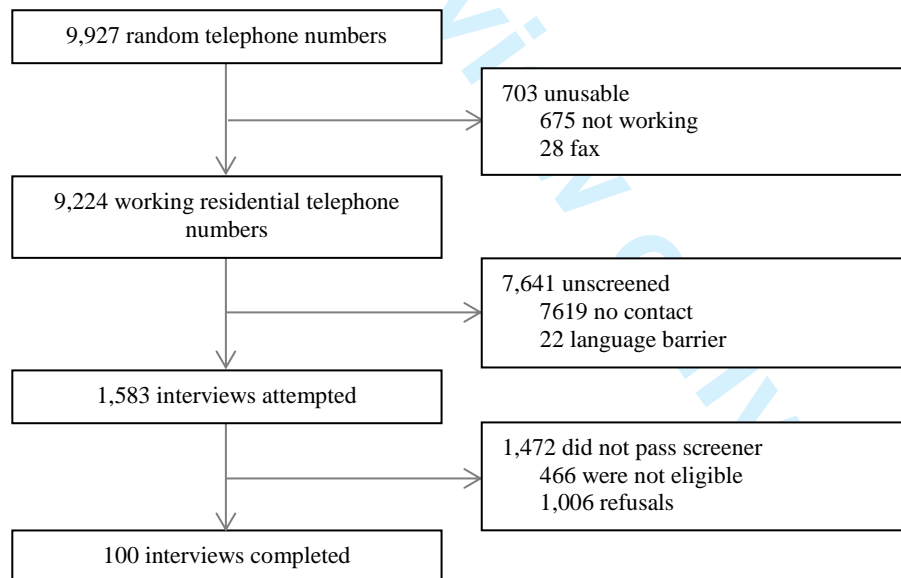

**Figure S2b.** Telephone sample recruitment flow diagram – UK

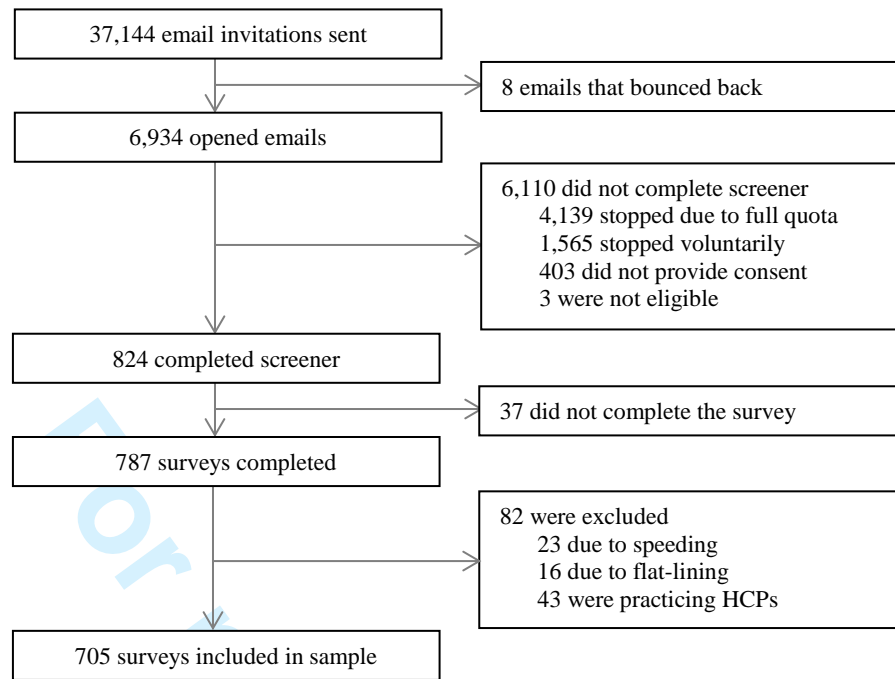

27  
28  
29  
30  
31  
32  
33

**Figure S3a.** Online sample recruitment flow diagram – France

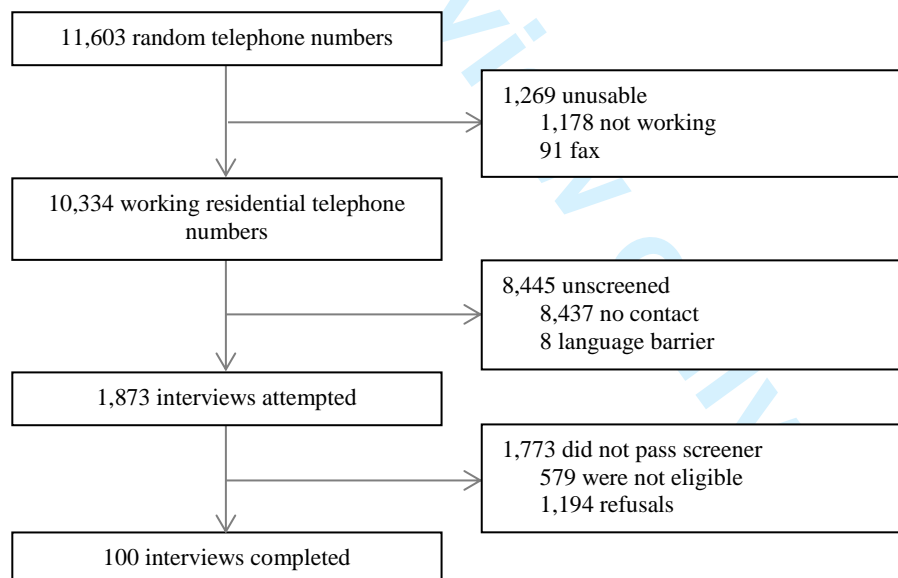

56  
57  
58  
59  
60

**Figure S3b.** Telephone sample recruitment flow diagram – France

**Box S1.** Key features of non-probability online panels

A non-probability online panel is a panel of participants (usually large – over 1 million people), which is not representative of the whole population of a country. This is because such panels include those who can and are interested in participating, usually for a fee, and do not normally include people who cannot or are less able to use the internet. Therefore, employing a combined recruitment strategy to access the latter segments, such as telephone interviews, is advisable.

**Box S2.** Description of the logistic regression procedure

Firstly, we generated a model per country entering all the variables at the same time (M1). Secondly, we manually removed the variables which were not significant in M1, but retained as controls all demographic, socio-economic and health variables, as follows. We generated a different model per country which included all the significant variables and all the non-significant variables except for one. This procedure was repeated for each one of the non-significant variables – resulting in 12 different specifications in the US, 11 in the UK and 21 in France – and checked the robustness of the results by assessing changes in the significance of the relationship between the independent and dependent variables. Thirdly, variables that were significant across most specifications and controls were entered in “blocks” using a hierarchical approach (M2-M8), to understand their role in explaining vaccination behaviour. The order in which the blocks of variables were entered was based upon previous evidence and our aim of assessing the importance of policy amenable factors in explaining influenza vaccination. This is because when predictors are correlated, as it is often the case, the order of variable entry can have an effect on the estimated model parameters. Thus, blocks of variables were entered in a sequence according to their conceptual importance: variables which had been frequently associated with vaccination uptake in the past were entered first and those which had been explored less were entered last. We prioritised demographic, socio-economic and health variables, and practical vaccination barriers, to allow these variables to account for the variance in vaccination behaviour before socio-psychological variables were incorporated. Seven blocks of explanatory variables were entered in the following order: 1) demographic, socio-economic and health-related variables; 2) practical barriers to influenza vaccination; 3) social influence; 4) influenza perceptions; 5) influenza vaccine perceptions; 6) trust in vaccination stakeholders; and 7) shared decision-making and childhood experiences.

**Table S1.** Included survey items

| Item                                                                                                                              | Response categories                                                                                                                                                                                                                                                                                                                                                                                                                                                                                                                                                                                                                                                                                                                     |
|-----------------------------------------------------------------------------------------------------------------------------------|-----------------------------------------------------------------------------------------------------------------------------------------------------------------------------------------------------------------------------------------------------------------------------------------------------------------------------------------------------------------------------------------------------------------------------------------------------------------------------------------------------------------------------------------------------------------------------------------------------------------------------------------------------------------------------------------------------------------------------------------|
| 1) Have you received a flu vaccine in the past 6 months (this autumn / winter)?                                                   | Yes / no                                                                                                                                                                                                                                                                                                                                                                                                                                                                                                                                                                                                                                                                                                                                |
| 2) What is your date of birth?                                                                                                    | Date                                                                                                                                                                                                                                                                                                                                                                                                                                                                                                                                                                                                                                                                                                                                    |
| 3) What is your gender?                                                                                                           | Female / male                                                                                                                                                                                                                                                                                                                                                                                                                                                                                                                                                                                                                                                                                                                           |
| 4) Which of the following ethnic groups do you feel you belong to?                                                                | List of country-specific groups                                                                                                                                                                                                                                                                                                                                                                                                                                                                                                                                                                                                                                                                                                         |
| 5) What is your combined annual household income?                                                                                 | List of country-specific income brackets                                                                                                                                                                                                                                                                                                                                                                                                                                                                                                                                                                                                                                                                                                |
| 6) Which of the following best describes your current situation?                                                                  | Married or living with a partner / single / widowed / divorced or separated / other / prefer not to say                                                                                                                                                                                                                                                                                                                                                                                                                                                                                                                                                                                                                                 |
| 7) Have you ever been diagnosed with any of the following conditions?                                                             | List of eligible conditions                                                                                                                                                                                                                                                                                                                                                                                                                                                                                                                                                                                                                                                                                                             |
| 8) What is the highest level of education you have completed?                                                                     | List of country-specific education levels                                                                                                                                                                                                                                                                                                                                                                                                                                                                                                                                                                                                                                                                                               |
| 9) Do you have a private health insurance                                                                                         | Yes / no                                                                                                                                                                                                                                                                                                                                                                                                                                                                                                                                                                                                                                                                                                                                |
| 10) Do you have public health insurance (e.g. Medicare) – US only                                                                 | Yes / no                                                                                                                                                                                                                                                                                                                                                                                                                                                                                                                                                                                                                                                                                                                                |
| 11) How actively do you participate with your physician in making decisions about health, generally? (Single select)              | 1. My physician always makes decisions for me<br>2. I like to know the options available but still let my physician decide for me<br>3. My physician and I make decisions together<br>4. I make decisions for myself, after considering the advice of my physician<br>5. I always make my own decisions, independently of the advice of my physician                                                                                                                                                                                                                                                                                                                                                                                    |
| 12) Which of the following statements best represents how much you trust your physician? (Multiple select)                        | <input type="radio"/> I can tell my physician anything, even things that I might not tell anyone else<br><input type="radio"/> My physician sometimes pretends to know things when he / she is not really sure<br><input type="radio"/> I completely trust my physician's judgment about my medical care<br><input type="radio"/> My physician cares more about cutting down costs than about doing what is needed for my health<br><input type="radio"/> My physician would always tell me the truth about my health, even if there was bad news<br><input type="radio"/> My physician cares as much as I do about my health<br><input type="radio"/> If a mistake was made in my treatment, my physician would try to hide it from me |
| 13) I generally trust vaccine manufacturers / pharmaceutical companies                                                            | Scale 0-10: strongly disagree / strongly agree                                                                                                                                                                                                                                                                                                                                                                                                                                                                                                                                                                                                                                                                                          |
| 14) I generally trust the National Health Service (or equivalent)                                                                 | Scale 0-10: strongly disagree / strongly agree                                                                                                                                                                                                                                                                                                                                                                                                                                                                                                                                                                                                                                                                                          |
| 15) Which of these statements best represents your past experiences as a child? (Multiple select)                                 | <input type="radio"/> I had a bad experience with vaccines or injections<br><input type="radio"/> I had a scary health-related experience                                                                                                                                                                                                                                                                                                                                                                                                                                                                                                                                                                                               |
| 16) I am scared of getting the flu                                                                                                | Scale 0-10: strongly disagree / strongly agree                                                                                                                                                                                                                                                                                                                                                                                                                                                                                                                                                                                                                                                                                          |
| 17) I believe that if I got the flu I would have to stay in bed for... (Single select)                                            | 1.0 days<br>2.1-2 days<br>3.3-4 days<br>4.5-6 days<br>5.1 week – 2 weeks<br>6. More than 2 weeks                                                                                                                                                                                                                                                                                                                                                                                                                                                                                                                                                                                                                                        |
| 18) The flu could make me severely ill                                                                                            | Scale 0-10: strongly disagree / strongly agree                                                                                                                                                                                                                                                                                                                                                                                                                                                                                                                                                                                                                                                                                          |
| 19) If I get a flu vaccine, I will be protected against the flu                                                                   | Scale 0-10: strongly disagree / strongly agree                                                                                                                                                                                                                                                                                                                                                                                                                                                                                                                                                                                                                                                                                          |
| 20) With no flu vaccine, I would feel very vulnerable to the flu                                                                  | Scale 0-10: strongly disagree / strongly agree                                                                                                                                                                                                                                                                                                                                                                                                                                                                                                                                                                                                                                                                                          |
| 21) If I got the flu, I would feel sicker than other people my age                                                                | Scale 0-10: strongly disagree / strongly agree                                                                                                                                                                                                                                                                                                                                                                                                                                                                                                                                                                                                                                                                                          |
| 22) I am confident I can avoid getting the flu, even without the flu vaccine                                                      | Scale 0-10: strongly disagree / strongly agree                                                                                                                                                                                                                                                                                                                                                                                                                                                                                                                                                                                                                                                                                          |
| 23) Without a flu vaccine, I am sure I would get the flu this winter                                                              | Scale 0-10: strongly disagree / strongly agree                                                                                                                                                                                                                                                                                                                                                                                                                                                                                                                                                                                                                                                                                          |
| 24) I feel I know enough about the flu vaccine to make an informed decision about whether to get vaccinated or not                | Scale 0-10: strongly disagree / strongly agree                                                                                                                                                                                                                                                                                                                                                                                                                                                                                                                                                                                                                                                                                          |
| 25) My physician thinks I should get a flu vaccine                                                                                | Scale 0-10: strongly disagree / strongly agree<br><input type="radio"/> I don't know/not applicable                                                                                                                                                                                                                                                                                                                                                                                                                                                                                                                                                                                                                                     |
| 26) My relatives or close friends think that I should get a flu vaccine                                                           | Scale 0-10: strongly disagree / strongly agree<br><input type="radio"/> I don't know/not applicable                                                                                                                                                                                                                                                                                                                                                                                                                                                                                                                                                                                                                                     |
| 27) If I don't get the flu vaccine and I get the flu, passing the flu to other people would worry me because it would be my fault | Scale 0-10: strongly disagree / strongly agree                                                                                                                                                                                                                                                                                                                                                                                                                                                                                                                                                                                                                                                                                          |
| 28) Which of the following statements apply to you? (Multiple select)                                                             | <input type="radio"/> It is easy for me to get to a place where I can get the flu vaccine                                                                                                                                                                                                                                                                                                                                                                                                                                                                                                                                                                                                                                               |

1  
2  
3  
4  
5  
6  
7  
8  
9  
10  
11  
12  
13  
14  
15  
16  
17  
18  
19  
20  
21  
22  
23  
24  
25  
26  
27  
28  
29  
30  
31  
32  
33  
34  
35  
36  
37  
38  
39  
40  
41  
42  
43  
44  
45  
46  
47  
48  
49  
50  
51  
52  
53  
54  
55  
56  
57  
58  
59  
60

|                                                                                                                 |                                                                  |
|-----------------------------------------------------------------------------------------------------------------|------------------------------------------------------------------|
|                                                                                                                 | ○ I can make time to get the flu vaccine                         |
| 29) If I don't get a flu vaccine and end up getting the flu this winter, I would regret not getting the vaccine | Scale 0-10: strongly disagree / strongly agree                   |
| 30) The flu vaccine is painful                                                                                  | Scale 0-10: strongly disagree / strongly agree<br>○ I don't know |
| 31) The flu vaccine could give me the flu                                                                       | Scale 0-10: strongly disagree / strongly agree                   |
| 32) I am worried that some of the contents of the flu vaccine may be dangerous for me                           | Scale 0-10: strongly disagree / strongly agree                   |
| 33) I am confident I can get a flu vaccine if I want one                                                        | Scale 0-10: strongly disagree / strongly agree                   |

For peer review only

**Table S2.** Determinants of influenza vaccination by influenza vaccination status – US

| Explanatory variables                                      | Min | Max | Vaccinated |      |       | Unvaccinated |           |      | SE    | 95% C.I. |       | t/X2   | df     | p-value |        |       |
|------------------------------------------------------------|-----|-----|------------|------|-------|--------------|-----------|------|-------|----------|-------|--------|--------|---------|--------|-------|
|                                                            |     |     | Total/yes  | M    | SD    | SE           | Total/yes | M    |       | SD       | SE    |        |        |         | Lower  | Upper |
| <b>1. Socio-economic, demographic and health variables</b> |     |     |            |      |       |              |           |      |       |          |       |        |        |         |        |       |
| 2) Age (dummy: 1 = ≥65)                                    | 0   | 1   | 378/105    | -    | -     | -            | 423/54    | -    | -     | -        | -     | -      | -      | 28.275  | 1.000  | 0.001 |
| 7) Eligible health condition (dummy: 1 = yes)              | 0   | 1   | 378/135    | -    | -     | -            | 423/64    | -    | -     | -        | -     | -      | -      | 45.299  | 1.000  | 0.001 |
| 9) Private health insurance (dummy: 1 = yes)               | 0   | 1   | 378/253    | -    | -     | -            | 423/234   | -    | -     | -        | -     | -      | -      | 11.293  | 1.000  | 0.001 |
| 10) Public health insurance (dummy: 1 = yes)               | 0   | 1   | 378/170    | -    | -     | -            | 423/122   | -    | -     | -        | -     | -      | -      | 22.425  | 1.000  | 0.001 |
| 3) Gender (dummy: 1 = female)                              | 0   | 1   | 378/182    | -    | -     | -            | 423/218   | -    | -     | -        | -     | -      | -      | 0.917   | 1.000  | 0.99  |
| 6) Marital status (dummy: 1 = in a partnership)            | 0   | 1   | 374/245    | -    | -     | -            | 418/236   | -    | -     | -        | -     | -      | -      | 6.777   | 1.000  | 0.01  |
| 5) Income bands (1 = ≤\$10,000 - 9 = ≥\$150,000)           | 1   | 9   | 343        | 2.97 | 1.760 | 0.106        | 392       | 5.00 | 2.239 | .113     | 0.162 | -1.207 | -0.572 | -5.495  | 733.00 | 0.001 |
| 8) Level of education (dummy: 1 = university degree)       | 0   | 1   | 365/228    | -    | -     | -            | 399/207   | -    | -     | -        | -     | -      | -      | 8.712   | 1.000  | 0.01  |
| 4) Ethnicity (dummy: 1 = white)                            | 0   | 1   | 375/262    | -    | -     | -            | 420/291   | -    | -     | -        | -     | -      | -      | 0.032   | 1.000  | 0.99  |
| <b>2. Practical barriers to influenza vaccination</b>      |     |     |            |      |       |              |           |      |       |          |       |        |        |         |        |       |
| 28) Vaccine access (dummy: 1 = yes)                        | 0   | 1   | 378/340    | -    | -     | -            | 423/317   | -    | -     | -        | -     | -      | -      | 30.484  | 1.000  | 0.001 |
| 28) Time to vaccinate (dummy: 1 = yes)                     | 0   | 1   | 378/336    | -    | -     | -            | 423/282   | -    | -     | -        | -     | -      | -      | 55.924  | 1.000  | 0.001 |
| <b>3. Social influence</b>                                 |     |     |            |      |       |              |           |      |       |          |       |        |        |         |        |       |
| 25) Physician thinks I should vaccinate*                   | 0   | 10  | 354        | 9.00 | 1.755 | 0.093        | 338       | 5.86 | 3.393 | 0.185    | 0.207 | -3.543 | -2.730 | -15.166 | 499.95 | 0.001 |
| 26) Relatives think I should vaccinate*                    | 0   | 10  | 329        | 8.02 | 2.405 | 0.133        | 361       | 4.67 | 3.277 | 0.172    | 0.218 | -3.775 | -2.921 | -15.391 | 658.72 | 0.001 |
| <b>4. Influenza perceptions</b>                            |     |     |            |      |       |              |           |      |       |          |       |        |        |         |        |       |
| 20) Vulnerability to influenza                             | 0   | 10  | 378        | 7.47 | 2.587 | 0.133        | 423       | 3.14 | 2.865 | 0.139    | 0.193 | -4.712 | -3.956 | -22.502 | 798.91 | 0.001 |
| 21) Susceptibility to influenza                            | 0   | 10  | 378        | 4.80 | 3.177 | 0.163        | 423       | 3.68 | 2.902 | 0.141    | 0.215 | -1.550 | -0.706 | -5.251  | 799.00 | 0.001 |
| 23) Likelihood of influenza                                | 0   | 10  | 378        | 5.76 | 2.868 | 0.147        | 423       | 2.22 | 2.607 | 0.127    | 0.194 | -3.926 | -3.163 | -18.226 | 766.19 | 0.001 |
| 17) Severity of influenza (bed days)                       | 1   | 6   | 378        | 2.94 | 1.149 | 0.059        | 423       | 2.66 | 1.108 | 0.054    | 0.080 | -0.437 | -0.123 | -3.510  | 799.00 | 0.001 |
| 18) Severity of influenza                                  | 0   | 10  | 378        | 7.74 | 2.591 | 0.133        | 423       | 6.36 | 2.701 | 0.131    | 0.188 | -1.745 | -1.009 | -7.341  | 799.00 | 0.001 |
| 16) Fear of influenza                                      | 0   | 10  | 378        | 5.26 | 3.276 | 0.169        | 423       | 3.57 | 2.958 | 0.144    | 0.222 | -2.132 | -1.262 | -7.659  | 764.04 | 0.001 |
| 27) Worry of transmitting influenza                        | 0   | 10  | 378        | 6.76 | 3.019 | 0.155        | 423       | 4.83 | 3.198 | 0.155    | 0.220 | -2.365 | -1.499 | -8.764  | 799.00 | 0.001 |
| 22) Perceived control (over influenza)                     | 0   | 10  | 378        | 3.68 | 3.065 | 0.158        | 423       | 6.49 | 2.741 | 0.133    | 0.206 | 2.412  | 3.222  | 13.645  | 761.04 | 0.001 |
| 29) Anticipated regret of not vaccinating                  | 0   | 10  | 378        | 7.11 | 3.118 | 0.160        | 423       | 6.66 | 2.823 | 0.137    | 0.210 | -0.862 | -0.037 | -2.141  | 799.00 | 0.05  |
| <b>5. Influenza vaccine perceptions</b>                    |     |     |            |      |       |              |           |      |       |          |       |        |        |         |        |       |
| 24) Perceived knowledge of vaccine (informed decisions)*   | 0   | 10  | 377        | 8.42 | 2.150 | 0.111        | 423       | 7.12 | 2.597 | 0.126    | 0.168 | -1.631 | -0.972 | -7.750  | 793.77 | 0.001 |
| 19) Vaccine effectiveness                                  | 0   | 10  | 378        | 7.38 | 2.172 | 0.112        | 423       | 4.12 | 2.942 | 0.143    | 0.182 | -3.612 | -2.899 | -17.934 | 772.19 | 0.001 |
| 30) The vaccine is painful*                                | 0   | 10  | 377        | 3.00 | 3.231 | 0.166        | 356       | 3.73 | 3.099 | 0.164    | 0.234 | 0.271  | 1.190  | 3.120   | 731.00 | 0.01  |
| 31) The vaccine could transmit influenza                   | 0   | 10  | 378        | 3.01 | 3.270 | 0.168        | 423       | 5.58 | 3.222 | 0.157    | 0.230 | 2.128  | 3.029  | 11.228  | 799.00 | 0.001 |
| 32) Vaccine contents could be dangerous                    | 0   | 10  | 378        | 3.03 | 3.173 | 0.163        | 423       | 5.31 | 3.364 | 0.164    | 0.232 | 1.828  | 2.738  | 9.849   | 799.00 | 0.001 |
| 33) Vaccine-related self-efficacy                          | 0   | 10  | 378        | 7.93 | 2.736 | 0.141        | 423       | 4.20 | 3.389 | 0.165    | 0.217 | -4.156 | -3.305 | -17.213 | 791.02 | 0.001 |



| Explanatory variables                                      | Min | Max | Vaccinated |      |       | Unvaccinated |        |      | SE    | 95% C.I. |       | t / $\chi^2$ | df     | p <     |        |       |
|------------------------------------------------------------|-----|-----|------------|------|-------|--------------|--------|------|-------|----------|-------|--------------|--------|---------|--------|-------|
|                                                            |     |     | N          | Mean | SD    | SE           | N      | Mean |       | SD       | SE    |              |        |         | Lower  | Upper |
| <b>6. Trust in vaccination stakeholders</b>                |     |     |            |      |       |              |        |      |       |          |       |              |        |         |        |       |
| 12) Trust physician (scale)                                | 0   | 7   | 378        | 7.94 | 2.261 | 0.119        | 423    | 4.35 | 1.561 | 0.076    | 0.115 | -0.579       | -0.129 | -3.087  | 773.65 | 0.01  |
| 13) Trust in vaccine manufacturers                         | 0   | 10  | 378        | 7.04 | 2.212 | 0.114        | 423    | 4.78 | 2.732 | 0.133    | 0.181 | -2.209       | -1.499 | -10.255 | 798.57 | 0.001 |
| 14) Trust in the NHS                                       | 0   | 10  | 378        | 4.71 | 1.672 | 0.086        | 423    | 5.47 | 2.751 | 0.134    | 0.176 | -1.914       | -1.225 | -8.937  | 790.44 | 0.001 |
| <b>7. Shared decision-making and childhood experiences</b> |     |     |            |      |       |              |        |      |       |          |       |              |        |         |        |       |
| 11) Shared decision-making – physician                     | 1   | 5   | 378        | 3.03 | 0.889 | 0.046        | 423    | 3.30 | 0.953 | 0.046    | 0.065 | 0.141        | 0.396  | 4.127   | 797.52 | 0.001 |
| 15) Bad experience with vaccines (child)                   | 0   | 1   | 378/41     | -    | -     | -            | 423/36 | -    | -     | -        | -     | -            | -      | 1.254   | 1.000  | 0.99  |
| 15) Scary health experience (child)                        | 0   | 1   | 378/48     | -    | -     | -            | 423/31 | -    | -     | -        | -     | -            | -      | 6.475   | 1.000  | 0.01  |

C.I. = confidence interval; df = degrees of freedom; DoH = Department of Health; HCP = healthcare professional; p = p-value; SD = standard deviation; SE = standard error. df with decimals are adjusted to correct for the violation of the assumption of equal variances (Levene's Test for Equality of Variances was statistically significant). p-values were obtained using Chi-square tests ( $\chi^2$ ) for categorical variables and Independent t-tests (t) for interval or continuous variables. p < 0.05 was considered statistically significant. \*Variables with "I do not know" responses which were dichotomised for regression analysis. In brackets is the number of the question corresponding to each explanatory variable (see Table S1).

**Table S3.** Determinants of influenza vaccination by influenza vaccination status – UK

| Explanatory variables                                      | Min | Max | Vaccinated |      |        | Unvaccinated |           |      | SE     | 95% C.I. |        | t/X2   | df     | p-value |        |       |
|------------------------------------------------------------|-----|-----|------------|------|--------|--------------|-----------|------|--------|----------|--------|--------|--------|---------|--------|-------|
|                                                            |     |     | Total/yes  | M    | SD     | SE           | Total/yes | M    |        | SD       | SE     |        |        |         | Lower  | Upper |
| <b>1. Socio-economic, demographic and health variables</b> |     |     |            |      |        |              |           |      |        |          |        |        |        |         |        |       |
| 2) Age (dummy: 1 = ≥65)                                    | 0   | 1   | 302/134    | -    | -      | -            | 504/45    | -    | -      | -        | -      | -      | -      | 137.30  | 1.000  | 0.001 |
| 7) Eligible health condition (dummy: 1 = yes)              | 0   | 1   | 302/141    | -    | -      | -            | 504/42    | -    | -      | -        | -      | -      | -      | 166.87  | 1.000  | 0.001 |
| 9) Private health insurance (dummy: 1 = yes)               | 0   | 1   | 302/52     | -    | -      | -            | 504/57    | -    | -      | -        | -      | -      | -      | 5.638   | 1.000  | 0.05  |
| 3) Gender (dummy: 1 = female)                              | 0   | 1   | 302/147    | -    | -      | -            | 504/266   | -    | -      | -        | -      | -      | -      | 1.272   | 1.000  | 0.99  |
| 6) Marital status (dummy: 1 = in a partnership)            | 0   | 1   | 300/177    | -    | -      | -            | 501/270   | -    | -      | -        | -      | -      | -      | 1.985   | 1.000  | 0.99  |
| 5) Income bands (1 = ≤£10,000 - 8 = ≥£70,000)              | 1   | 8   | 274        | 2.97 | 1.760  | 0.106        | 472       | 3.19 | 1.853  | 0.086    | 0.139  | -0.055 | 0.490  | 1.568   | 734.00 | 0.99  |
| 8) Level of education (dummy: 1 = university degree)       | 0   | 1   | 292/103    | -    | -      | -            | 492/198   | -    | -      | -        | -      | -      | -      | 1.914   | 1.000  | 0.99  |
| 4) Ethnicity (1 = white)                                   | 0   | 1   | 302/278    | -    | -      | -            | 497/435   | -    | -      | -        | -      | -      | -      | 4.010   | 1.000  | 0.05  |
| <b>2. Practical barriers to influenza vaccination</b>      |     |     |            |      |        |              |           |      |        |          |        |        |        |         |        |       |
| 28) Vaccine access (dummy: 1 = yes)                        | 0   | 1   | 302/281    | -    | -      | -            | 504/371   | -    | -      | -        | -      | -      | -      | 46.151  | 1.000  | 0.001 |
| 28) Time to vaccinate (dummy: 1 = yes)                     | 0   | 1   | 302/270    | -    | -      | -            | 504/360   | -    | -      | -        | -      | -      | -      | 35.750  | 1.000  | 0.001 |
| <b>3. Social influence</b>                                 |     |     |            |      |        |              |           |      |        |          |        |        |        |         |        |       |
| 25) Physician thinks I should vaccinate*                   | 0   | 10  | 271        | 8.86 | 1.943  | 0.118        | 370       | 3.38 | 3.307  | 0.182    | 0.217  | -5.906 | -5.054 | -25.261 | 546.17 | 0.001 |
| 26) Relatives think I should vaccinate*                    | 0   | 10  | 255        | 7.52 | 2.691  | 0.169        | 390       | 2.80 | 3.005  | 0.152    | 0.227  | -5.161 | -4.269 | -20.767 | 583.61 | 0.001 |
| <b>4. Influenza perceptions</b>                            |     |     |            |      |        |              |           |      |        |          |        |        |        |         |        |       |
| 20) Vulnerability to influenza                             | 0   | 10  | 302        | 7.22 | 2.6893 | 0.155        | 504       | 3.10 | 2.5019 | 0.111    | -4.112 | -4.480 | -3.744 | -21.956 | 804.00 | 0.001 |
| 21) Susceptibility to influenza                            | 0   | 10  | 302        | 5.28 | 3.162  | 0.182        | 504       | 3.36 | 2.805  | 0.125    | -1.924 | -2.358 | -1.491 | -8.719  | 575.29 | 0.001 |
| 23) Likelihood of influenza                                | 0   | 10  | 302        | 5.66 | 2.707  | 0.156        | 504       | 2.31 | 2.480  | 0.110    | -3.348 | -3.715 | -2.981 | -17.921 | 804.00 | 0.001 |
| 17) Severity of influenza (bed days)                       | 1   | 6   | 302        | 3.14 | 1.216  | 0.070        | 504       | 2.83 | 1.227  | 0.055    | -0.311 | -0.486 | -0.136 | -3.496  | 804.00 | 0.001 |
| 18) Severity of influenza                                  | 0   | 10  | 302        | 7.90 | 2.396  | 0.138        | 504       | 6.06 | 2.552  | 0.114    | -1.836 | -2.187 | -1.485 | -10.273 | 665.45 | 0.001 |
| 16) Fear of influenza                                      | 0   | 10  | 302        | 4.87 | 3.200  | 0.184        | 504       | 3.14 | 2.696  | 0.120    | -1.732 | -2.164 | -1.300 | -7.879  | 551.80 | 0.001 |
| 27) Worry of transmitting influenza                        | 0   | 10  | 302        | 6.64 | 2.900  | 0.167        | 504       | 4.70 | 2.920  | 0.130    | -1.937 | -2.353 | -1.521 | -9.140  | 804.00 | 0.001 |
| 22) Perceived control (over influenza)                     | 0   | 10  | 302        | 3.21 | 2.703  | 0.156        | 504       | 5.68 | 2.595  | 0.116    | 2.472  | 2.095  | 2.849  | 12.886  | 804.00 | 0.001 |
| 29) Anticipated regret of not vaccinating                  | 0   | 10  | 302        | 8.52 | 2.176  | 0.125        | 504       | 3.94 | 3.027  | 0.135    | -4.582 | -4.943 | -4.221 | -24.901 | 777.86 | 0.001 |
| <b>5. Influenza vaccine perceptions</b>                    |     |     |            |      |        |              |           |      |        |          |        |        |        |         |        |       |
| 24) Perceived knowledge of vaccine (informed decisions)*   | 0   | 10  | 301        | 8.26 | 2.033  | 0.117        | 502       | 6.44 | 2.611  | 0.117    | -1.826 | -2.151 | -1.502 | -11.050 | 748.41 | 0.001 |
| 19) Vaccine effectiveness                                  | 0   | 10  | 302        | 7.50 | 2.194  | 0.126        | 504       | 5.24 | 2.768  | 0.123    | -2.257 | -2.603 | -1.910 | -12.786 | 743.90 | 0.001 |
| 30) The vaccine is painful*                                | 0   | 10  | 299        | 2.38 | 2.958  | 0.171        | 364       | 3.06 | 2.899  | 0.152    | 0.228  | 0.231  | 1.128  | 2.977   | 661.00 | 0.01  |
| 31) The vaccine could transmit influenza                   | 0   | 10  | 302        | 2.80 | 3.090  | 0.178        | 504       | 4.18 | 3.019  | 0.135    | 1.377  | 0.941  | 1.812  | 6.210   | 804.00 | 0.001 |
| 32) Vaccine contents could be dangerous                    | 0   | 10  | 302        | 2.41 | 2.758  | 0.159        | 504       | 3.42 | 2.992  | 0.133    | 1.008  | 0.601  | 1.415  | 4.863   | 674.42 | 0.001 |
| 33) Vaccine-related self-efficacy                          | 0   | 10  | 302        | 9.05 | 1.803  | 0.104        | 504       | 7.16 | 2.880  | 0.128    | -1.890 | -2.214 | -1.566 | -11.449 | 802.47 | 0.001 |

| Explanatory variables                                      | Min | Max | Vaccinated |      |       | Unvaccinated |        |      | SE    | 95% C.I. |        | t / $\chi^2$ | df     | p <    |        |       |
|------------------------------------------------------------|-----|-----|------------|------|-------|--------------|--------|------|-------|----------|--------|--------------|--------|--------|--------|-------|
|                                                            |     |     | N          | Mean | SD    | SE           | N      | Mean |       | SD       | SE     |              |        |        | Lower  | Upper |
| <b>6. Trust in vaccination stakeholders</b>                |     |     |            |      |       |              |        |      |       |          |        |              |        |        |        |       |
| 12) Trust physician (scale)                                | 0   | 7   | 302        | 4.68 | 1.742 | 0.100        | 504    | 3.99 | 1.538 | 0.069    | -0.687 | -0.925       | -0.448 | -5.655 | 572.95 | 0.001 |
| 13) Trust in vaccine manufacturers                         | 0   | 10  | 302        | 6.71 | 2.187 | 0.126        | 504    | 5.58 | 2.513 | 0.112    | -1.127 | -1.458       | -0.796 | -6.691 | 702.58 | 0.001 |
| 14) Trust in the NHS                                       | 0   | 10  | 302        | 7.71 | 1.954 | 0.112        | 504    | 6.86 | 2.156 | 0.096    | -0.849 | -1.146       | -0.551 | -5.599 | 804.00 | 0.001 |
| <b>7. Shared decision-making and childhood experiences</b> |     |     |            |      |       |              |        |      |       |          |        |              |        |        |        |       |
| 11) Shared decision-making – physician                     | 1   | 5   | 302        | 2.85 | 0.908 | 0.052        | 504    | 3.21 | 1.000 | 0.045    | 0.357  | 0.223        | 0.492  | 5.203  | 681.88 | 0.001 |
| 15) Bad experience with vaccines (child)                   | 0   | 1   | 302/22     | -    | -     | -            | 504/63 | -    | -     | -        | -      | -            | -      | 5.445  | 1.000  | 0.05  |
| 15) Scary health experience (child)                        | 0   | 1   | 302/58     | -    | -     | -            | 504/45 | -    | -     | -        | -      | -            | -      | 17.893 | 1.000  | 0.001 |

C.I. = confidence interval; df = degrees of freedom; NHS = National Health Service; HCP = healthcare professional; p = p-value; SD = standard deviation; SE = standard error. df with decimals are adjusted to correct for the violation of the assumption of equal variances (Levene's Test for Equality of Variances was statistically significant). p-values were obtained using Chi-square tests ( $\chi^2$ ) for categorical variables and Independent t-tests (t) for interval or continuous variables. p < 0.05 was considered statistically significant. \*Variables with "I do not know" responses which were dichotomised for regression analysis. In brackets is the number of the question corresponding to each explanatory variable (see Table S1).

Table S4. Determinants of influenza vaccination by influenza vaccination status – France

| Explanatory variables                                      | Min | Max | Vaccinated |      |       | Unvaccinated |           |      | SE    | 95% C.I. |       | t/X2   | df     | p-value |        |       |
|------------------------------------------------------------|-----|-----|------------|------|-------|--------------|-----------|------|-------|----------|-------|--------|--------|---------|--------|-------|
|                                                            |     |     | Total/yes  | M    | SD    | SE           | Total/yes | M    |       | SD       | SE    |        |        |         | Lower  | Upper |
| <b>1. Socio-economic, demographic and health variables</b> |     |     |            |      |       |              |           |      |       |          |       |        |        |         |        |       |
| 2) Age (dummy: 1 = ≥65)                                    | 0   | 1   | 192/95     | -    | -     | -            | 613/94    | -    | -     | -        | -     | -      | -      | 94.877  | 1.000  | 0.001 |
| 7) Eligible health condition (dummy: 1 = yes)              | 0   | 1   | 192/71     | -    | -     | -            | 613/120   | -    | -     | -        | -     | -      | -      | 24.469  | 1.000  | 0.001 |
| 9) Private health insurance (dummy: 1 = yes)               | 0   | 1   | 192/180    | -    | -     | -            | 613/529   | -    | -     | -        | -     | -      | -      | 7.732   | 1.000  | 0.005 |
| 3) Gender (dummy: 1 = female)                              | 0   | 1   | 192/97     | -    | -     | -            | 613/334   | -    | -     | -        | -     | -      | -      | 0.924   | 1.000  | 0.99  |
| 6) Marital status (dummy: 1 = in a partnership)            | 0   | 1   | 190/120    | -    | -     | -            | 605/314   | -    | -     | -        | -     | -      | -      | 7.391   | 1.000  | 0.01  |
| 5) Income bands (1 = ≤£10,000 - 8 = ≥£70,000)              | 1   | 6   | 165        | 2.78 | 1.269 | 0.099        | 539       | 2.35 | 1.272 | 0.055    | 0.11  | -0.65  | -0.21  | -3.81   | 702.00 | 0.001 |
| 8) Level of education (dummy: 1 = university degree)       | 0   | 1   | 182/64     | -    | -     | -            | 570/171   | -    | -     | -        | -     | -      | -      | 1.713   | 1.000  | 0.99  |
| <b>2. Practical barriers to influenza vaccination</b>      |     |     |            |      |       |              |           |      |       |          |       |        |        |         |        |       |
| 28) Vaccine access (dummy: 1 = yes)                        | 0   | 1   | 192/159    | -    | -     | -            | 613/445   | -    | -     | -        | -     | -      | -      | 8.149   | 1.000  | 0.01  |
| 28) Time to vaccinate (dummy: 1 = yes)                     | 0   | 1   | 192/165    | -    | -     | -            | 613/436   | -    | -     | -        | -     | -      | -      | 16.954  | 1.000  | 0.001 |
| <b>3. Social influence</b>                                 |     |     |            |      |       |              |           |      |       |          |       |        |        |         |        |       |
| 25) Physician thinks I should vaccinate*                   | 0   | 10  | 180        | 8.11 | 2.536 | 0.189        | 490       | 3.58 | 3.120 | 0.141    | 0.24  | -4.99  | -4.06  | -19.20  | 389.34 | 0.001 |
| 26) Relatives think I should vaccinate*                    | 0   | 10  | 160        | 6.57 | 3.097 | 0.245        | 532       | 2.92 | 2.879 | 0.125    | 0.264 | -4.163 | -3.125 | -13.790 | 690.00 | 0.001 |
| <b>4. Influenza perceptions</b>                            |     |     |            |      |       |              |           |      |       |          |       |        |        |         |        |       |
| 20) Vulnerability to influenza                             | 0   | 10  | 192        | 6.53 | 3.020 | 0.218        | 613       | 3.20 | 2.720 | 0.110    | 0.231 | -3.784 | -2.877 | -14.410 | 803.00 | 0.001 |
| 21) Susceptibility to influenza                            | 0   | 10  | 192        | 4.24 | 3.160 | 0.228        | 613       | 3.33 | 2.917 | 0.118    | 0.246 | -1.390 | -0.424 | -3.683  | 803.00 | 0.001 |
| 23) Likelihood of influenza                                | 0   | 10  | 192        | 4.51 | 3.018 | 0.218        | 613       | 2.12 | 2.424 | 0.098    | 0.239 | -2.855 | -1.914 | -9.984  | 272.52 | 0.001 |
| 17) Severity of influenza (bed days)                       | 1   | 6   | 192        | 3.19 | 1.153 | 0.083        | 613       | 3.03 | 1.110 | 0.045    | 0.093 | -0.340 | 0.023  | -1.710  | 803.00 | 0.1   |
| 18) Severity of influenza                                  | 0   | 10  | 192        | 7.24 | 2.628 | 0.190        | 613       | 5.34 | 2.782 | 0.112    | 0.227 | -2.344 | -1.453 | -8.359  | 803.00 | 0.001 |
| 16) Fear of influenza                                      | 0   | 10  | 192        | 4.44 | 3.442 | 0.248        | 613       | 2.91 | 2.819 | 0.114    | 0.273 | -2.072 | -0.996 | -5.613  | 275.89 | 0.001 |
| 27) Worry of transmitting influenza                        | 0   | 10  | 192        | 6.81 | 2.780 | 0.201        | 613       | 4.95 | 2.925 | 0.118    | 0.239 | -2.327 | -1.389 | -7.771  | 803.00 | 0.001 |
| 22) Perceived control (over influenza)                     | 0   | 10  | 192        | 3.02 | 2.982 | 0.215        | 613       | 4.89 | 2.899 | 0.117    | 0.241 | 1.400  | 2.347  | 7.761   | 803.00 | 0.001 |
| 29) Anticipated regret of not vaccinating                  | 0   | 10  | 192        | 8.22 | 2.562 | 0.185        | 613       | 7.44 | 2.572 | 0.104    | 0.212 | -1.197 | -0.363 | -3.672  | 803.00 | 0.001 |
| <b>5. Influenza vaccine perceptions</b>                    |     |     |            |      |       |              |           |      |       |          |       |        |        |         |        |       |
| 24) Perceived knowledge of vaccine (informed decisions)*   | 0   | 10  | 192        | 7.86 | 2.186 | 0.158        | 613       | 6.44 | 2.637 | 0.106    | 0.190 | -1.803 | -1.055 | -7.508  | 380.14 | 0.001 |
| 19) Vaccine effectiveness                                  | 0   | 10  | 192        | 7.25 | 2.281 | 0.165        | 613       | 4.52 | 2.840 | 0.115    | 0.201 | -3.121 | -2.332 | -13.588 | 392.51 | 0.001 |
| 30) The vaccine is painful*                                | 0   | 10  | 190        | 1.68 | 2.678 | 0.194        | 449       | 2.59 | 2.649 | 0.125    | 0.231 | 0.454  | 1.363  | 3.931   | 352.50 | 0.001 |
| 31) The vaccine could transmit influenza                   | 0   | 10  | 192        | 2.98 | 2.970 | 0.214        | 613       | 4.46 | 3.063 | 0.124    | 0.251 | 0.977  | 1.964  | 5.848   | 803.00 | 0.001 |
| 32) Vaccine contents could be dangerous                    | 0   | 10  | 192        | 2.99 | 3.077 | 0.222        | 613       | 5.14 | 3.316 | 0.134    | 0.270 | 1.621  | 2.680  | 7.976   | 803.00 | 0.001 |
| 33) Vaccine-related self-efficacy                          | 0   | 10  | 192        | 8.04 | 2.561 | 0.185        | 613       | 3.92 | 3.214 | 0.130    | 0.226 | -4.559 | -3.671 | -18.218 | 395.86 | 0.001 |

| Explanatory variables                                      | Min | Max | Vaccinated |      |       | Unvaccinated |        |      | SE    | 95% C.I. |       | t / $\chi^2$ | df     | p <    |        |       |
|------------------------------------------------------------|-----|-----|------------|------|-------|--------------|--------|------|-------|----------|-------|--------------|--------|--------|--------|-------|
|                                                            |     |     | N          | Mean | SD    | SE           | N      | Mean |       | SD       | SE    |              |        |        | Lower  | Upper |
| <b>6. Trust in vaccination stakeholders</b>                |     |     |            |      |       |              |        |      |       |          |       |              |        |        |        |       |
| 12) Trust physician (scale)                                | 0   | 7   | 192        | 4.97 | 1.447 | 0.104        | 613    | 4.39 | 1.483 | 0.060    | 0.122 | -0.820       | -0.341 | -4.761 | 803.00 | 0.001 |
| 13) Trust in vaccine manufacturers                         | 0   | 10  | 192        | 6.18 | 2.345 | 0.169        | 613    | 4.82 | 2.553 | 0.103    | 0.207 | -1.763       | -0.950 | -6.548 | 803.00 | 0.001 |
| 14) Trust in the NHS                                       | 0   | 10  | 192        | 6.29 | 2.537 | 0.183        | 613    | 5.44 | 2.461 | 0.099    | 0.205 | -1.250       | -0.445 | -4.135 | 803.00 | 0.001 |
| <b>7. Shared decision-making and childhood experiences</b> |     |     |            |      |       |              |        |      |       |          |       |              |        |        |        |       |
| 11) Shared decision-making – physician                     | 1   | 5   | 192        | 2.49 | 2.557 | 0.106        | 613    | 2.90 | 0.962 | 0.039    | 0.071 | -0.077       | 0.204  | 0.890  | 364.72 | 0.99  |
| 15) Bad experience with vaccines (child)                   | 0   | 1   | 192/20     | -    | -     | -            | 613/96 | -    | -     | -        | -     | -            | -      | 3.260  | 1.000  | 0.1   |
| 15) Scary health experience (child)                        | 0   | 1   | 192/31     | -    | -     | -            | 613/34 | -    | -     | -        | -     | -            | -      | 22.129 | 1.000  | 0.001 |

C.I. = confidence interval; df = degrees of freedom; HCP = healthcare professional; MH = Ministry of Health; p = p-value; SD = standard deviation; SE = standard error. df with decimals are adjusted to correct for the violation of the assumption of equal variances (Levene's Test for Equality of Variances was statistically significant). p-values were obtained using Chi-square tests ( $\chi^2$ ) for categorical variables and Independent t-tests (t) for interval or continuous variables. p < 0.05 was considered statistically significant. \*Variables with "I do not know" responses which were dichotomised for regression analysis. In brackets is the number of the question corresponding to each explanatory variable (see Table S1).

**Table S5.** Reliability analysis of socio-psychological scales across the three countries

| Explanatory variables                    | US                |                                  | UK                |                                  | France            |                                  |
|------------------------------------------|-------------------|----------------------------------|-------------------|----------------------------------|-------------------|----------------------------------|
|                                          | Cronbach $\alpha$ | Corrected Item-Total Correlation | Cronbach $\alpha$ | Corrected Item-Total Correlation | Cronbach $\alpha$ | Corrected Item-Total Correlation |
| <b>Social influence</b>                  | <b>0.87</b>       |                                  | <b>0.85</b>       |                                  | <b>0.82</b>       |                                  |
| Physician thinks I should vaccinate      |                   | 0.78                             |                   | 0.74                             |                   | 0.69                             |
| Relatives think I should vaccinate       |                   | 0.78                             |                   | 0.74                             |                   | 0.69                             |
| <b>Influenza perceptions</b>             | <b>0.83</b>       |                                  | <b>0.80</b>       |                                  | <b>0.82</b>       |                                  |
| Vulnerability to influenza               |                   | 0.78                             |                   | 0.72                             |                   | 0.76                             |
| Susceptibility to influenza              |                   | 0.48                             |                   | 0.50                             |                   | 0.52                             |
| Likelihood of influenza                  |                   | 0.64                             |                   | 0.56                             |                   | 0.66                             |
| Severity of influenza                    |                   | 0.61                             |                   | 0.59                             |                   | 0.57                             |
| Severity of influenza (bed days)         |                   | 0.58                             |                   | 0.50                             |                   | 0.52                             |
| Fear of influenza                        |                   | 0.47                             |                   | 0.53                             |                   | 0.45                             |
| Worry of transmitting influenza          |                   | 0.28                             |                   | 0.23                             |                   | 0.22                             |
| Perceived control (over influenza)*      |                   | 0.32                             |                   | 0.14                             |                   | 0.35                             |
| Anticipated regret of not vaccinating    |                   | 0.61                             |                   | 0.63                             |                   | 0.67                             |
| <b>Influenza vaccine perceptions</b>     | <b>0.72</b>       |                                  | <b>0.65</b>       |                                  | <b>0.72</b>       |                                  |
| Vaccine contents could be dangerous*     |                   | 0.69                             |                   | 0.58                             |                   | 0.62                             |
| The vaccine could transmit influenza*    |                   | 0.65                             |                   | 0.56                             |                   | 0.61                             |
| The vaccine is painful*                  |                   | 0.39                             |                   | 0.32                             |                   | 0.45                             |
| Vaccine effectiveness                    |                   | 0.32                             |                   | 0.25                             |                   | 0.24                             |
| <b>Trust in vaccination stakeholders</b> | <b>0.86</b>       |                                  | <b>0.82</b>       |                                  | <b>0.72</b>       |                                  |
| Trust in vaccine manufacturers           |                   | 0.75                             |                   | 0.69                             |                   | 0.57                             |
| Trust in health authorities              |                   | 0.75                             |                   | 0.69                             |                   | 0.57                             |

Continuous scales were used for reliability analyses. "I don't know/not applicable" responses were coded as missing for the purpose of this analysis. \*items that were reverse-scored to perform reliability analyses. The items "vaccine-related self-efficacy", "perceived knowledge of vaccine" and "trust in GP (scale)" were not included because the former belong to different constructs and the latter is a standalone scale.

STROBE Statement—Checklist of items that should be included in reports of *cross-sectional studies*

|                              | Item No | Recommendation                                                                                                                                                                                                                                                                                                                                                                                                                                                                        |
|------------------------------|---------|---------------------------------------------------------------------------------------------------------------------------------------------------------------------------------------------------------------------------------------------------------------------------------------------------------------------------------------------------------------------------------------------------------------------------------------------------------------------------------------|
| <b>Title and abstract</b>    | 1       | (a) Indicate the study's design with a commonly used term in the title or the abstract [Page 1]<br>(b) Provide in the abstract an informative and balanced summary of what was done and what was found [Page 2]                                                                                                                                                                                                                                                                       |
| <b>Introduction</b>          |         |                                                                                                                                                                                                                                                                                                                                                                                                                                                                                       |
| Background/rationale         | 2       | Explain the scientific background and rationale for the investigation being reported [Pages 4-6]                                                                                                                                                                                                                                                                                                                                                                                      |
| Objectives                   | 3       | State specific objectives, including any prespecified hypotheses [Page 6]                                                                                                                                                                                                                                                                                                                                                                                                             |
| <b>Methods</b>               |         |                                                                                                                                                                                                                                                                                                                                                                                                                                                                                       |
| Study design                 | 4       | Present key elements of study design early in the paper [Pages 6-9]                                                                                                                                                                                                                                                                                                                                                                                                                   |
| Setting                      | 5       | Describe the setting, locations, and relevant dates, including periods of recruitment, exposure, follow-up, and data collection [Page 6]                                                                                                                                                                                                                                                                                                                                              |
| Participants                 | 6       | (a) Give the eligibility criteria, and the sources and methods of selection of participants [Pages 6, 7 and 10]                                                                                                                                                                                                                                                                                                                                                                       |
| Variables                    | 7       | Clearly define all outcomes, exposures, predictors, potential confounders, and effect modifiers. Give diagnostic criteria, if applicable [Pages 7-9 and Table S1 in Supplementary material]                                                                                                                                                                                                                                                                                           |
| Data sources/<br>measurement | 8*      | For each variable of interest, give sources of data and details of methods of assessment (measurement). Describe comparability of assessment methods if there is more than one group [Page 8-9 and Table S1 in Supplementary material]                                                                                                                                                                                                                                                |
| Bias                         | 9       | Describe any efforts to address potential sources of bias [Pages 6-9]                                                                                                                                                                                                                                                                                                                                                                                                                 |
| Study size                   | 10      | Explain how the study size was arrived at [Page 6]                                                                                                                                                                                                                                                                                                                                                                                                                                    |
| Quantitative variables       | 11      | Explain how quantitative variables were handled in the analyses. If applicable, describe which groupings were chosen and why [Pages 8-9 and Box S2 in Supplementary material]                                                                                                                                                                                                                                                                                                         |
| Statistical methods          | 12      | (a) Describe all statistical methods, including those used to control for confounding [Pages 8-9 and Box S2 in Supplementary material]<br>(b) Describe any methods used to examine subgroups and interactions [Pages 8-9]<br>(c) Explain how missing data were addressed [Page 8]<br>(d) If applicable, describe analytical methods taking account of sampling strategy [N/A]<br>(e) Describe any sensitivity analyses [Page 8-9]                                                     |
| <b>Results</b>               |         |                                                                                                                                                                                                                                                                                                                                                                                                                                                                                       |
| Participants                 | 13*     | (a) Report numbers of individuals at each stage of study—eg numbers potentially eligible, examined for eligibility, confirmed eligible, included in the study, completing follow-up, and analysed [Page 9-10 and Figures S1a-S3a and S1b-S3b in Supplementary material]<br>(b) Give reasons for non-participation at each stage [Figures S1a-S3a and S1b-S3b in Supplementary material]<br>(c) Consider use of a flow diagram [Figures S1a-S3a and S1b-S3b in Supplementary material] |
| Descriptive data             | 14*     | (a) Give characteristics of study participants (eg demographic, clinical, social) and information on exposures and potential confounders [Table 1 and Tables S2-S4 in Supplementary material]                                                                                                                                                                                                                                                                                         |

|                          |     |                                                                                                                                                                                                                                                                                                                                                                                                                                                         |
|--------------------------|-----|---------------------------------------------------------------------------------------------------------------------------------------------------------------------------------------------------------------------------------------------------------------------------------------------------------------------------------------------------------------------------------------------------------------------------------------------------------|
|                          |     | (b) Indicate number of participants with missing data for each variable of interest [Tables S2-S4 in Supplementary material]                                                                                                                                                                                                                                                                                                                            |
| Outcome data             | 15* | Report numbers of outcome events or summary measures [Tables S2-S4 in Supplementary material]                                                                                                                                                                                                                                                                                                                                                           |
| Main results             | 16  | (a) Give unadjusted estimates and, if applicable, confounder-adjusted estimates and their precision (eg, 95% confidence interval). Make clear which confounders were adjusted for and why they were included [Page 12 and Tables 2-4]<br>(b) Report category boundaries when continuous variables were categorized [Page 8-9]<br>(c) If relevant, consider translating estimates of relative risk into absolute risk for a meaningful time period [N/A] |
| Other analyses           | 17  | Report other analyses done—eg analyses of subgroups and interactions, and sensitivity analyses [Page 10, 12 and 19]                                                                                                                                                                                                                                                                                                                                     |
| <b>Discussion</b>        |     |                                                                                                                                                                                                                                                                                                                                                                                                                                                         |
| Key results              | 18  | Summarise key results with reference to study objectives [Pages 20, 22-24 and Table 5]                                                                                                                                                                                                                                                                                                                                                                  |
| Limitations              | 19  | Discuss limitations of the study, taking into account sources of potential bias or imprecision. Discuss both direction and magnitude of any potential bias [Pages 25-26-28]                                                                                                                                                                                                                                                                             |
| Interpretation           | 20  | Give a cautious overall interpretation of results considering objectives, limitations, multiplicity of analyses, results from similar studies, and other relevant evidence [Pages 20, 22-26]                                                                                                                                                                                                                                                            |
| Generalisability         | 21  | Discuss the generalisability (external validity) of the study results [26-27]                                                                                                                                                                                                                                                                                                                                                                           |
| <b>Other information</b> |     |                                                                                                                                                                                                                                                                                                                                                                                                                                                         |
| Funding                  | 22  | Give the source of funding and the role of the funders for the present study and, if applicable, for the original study on which the present article is based [29]                                                                                                                                                                                                                                                                                      |

\*Give information separately for exposed and unexposed groups.

**Note:** An Explanation and Elaboration article discusses each checklist item and gives methodological background and published examples of transparent reporting. The STROBE checklist is best used in conjunction with this article (freely available on the Web sites of PLoS Medicine at <http://www.plosmedicine.org/>, Annals of Internal Medicine at <http://www.annals.org/>, and Epidemiology at <http://www.epidem.com/>). Information on the STROBE Initiative is available at [www.strobe-statement.org](http://www.strobe-statement.org).



# BMJ Open

## Evaluating the importance of policy amenable factors in explaining influenza vaccination: a cross-sectional multinational study

|                                 |                                                                                                                                                                                                                                                                        |
|---------------------------------|------------------------------------------------------------------------------------------------------------------------------------------------------------------------------------------------------------------------------------------------------------------------|
| Journal:                        | <i>BMJ Open</i>                                                                                                                                                                                                                                                        |
| Manuscript ID                   | bmjopen-2016-014668.R2                                                                                                                                                                                                                                                 |
| Article Type:                   | Research                                                                                                                                                                                                                                                               |
| Date Submitted by the Author:   | 04-May-2017                                                                                                                                                                                                                                                            |
| Complete List of Authors:       | Wheelock, Ana; Imperial College London, Surgery and Cancer<br>Miraldo, Marisa; Imperial College London, Business School<br>Thomson, Angus; Sanofi Pasteur<br>Vincent, Charles; University of Oxford, Experimental Psychology<br>Sevdalis, Nick; King's College London, |
| <b>Primary Subject Heading</b>: | Health policy                                                                                                                                                                                                                                                          |
| Secondary Subject Heading:      | Public health, Infectious diseases, Patient-centred medicine                                                                                                                                                                                                           |
| Keywords:                       | Influenza, Vaccine, Adult, Beliefs, Perceptions, Behaviour                                                                                                                                                                                                             |
|                                 |                                                                                                                                                                                                                                                                        |

SCHOLARONE™  
Manuscripts

1  
2  
3 **EVALUATING THE IMPORTANCE OF POLICY AMENABLE FACTORS IN**  
4 **EXPLAINING INFLUENZA VACCINATION: A CROSS-SECTIONAL**  
5 **MULTINATIONAL STUDY**  
6  
7

8  
9 Ana Wheelock, PhD<sup>1†</sup>; Marisa Miraldo, PhD<sup>2</sup>; Angus Thomson, PhD<sup>3</sup>; Charles Vincent,  
10 PhD<sup>4</sup>; Nick Sevdalis, PhD<sup>5</sup>  
11  
12

13  
14 <sup>1</sup>Faculty of Medicine, Imperial College London, London, UK; <sup>2</sup>Imperial College Business  
15 School, London, UK; <sup>3</sup>Sanofi Pasteur, Lyon, France; <sup>4</sup>Department of Experimental  
16 Psychology, University of Oxford, Oxford, UK; <sup>5</sup>Centre for Implementation Science, Health  
17 Service and Population Research Department, King's College London, London, UK  
18  
19  
20  
21

22  
23 **CORRESPONDING AUTHOR AND ADDRESS**

24 Ana Wheelock  
25  
26 Imperial College London  
27  
28 Faculty of Medicine, Medical School Building  
29  
30 St Mary's Campus, Norfolk Place  
31  
32 London W2 1PG, United Kingdom  
33  
34 Tel. 0044 207 594 3433. Email: [a.wheelock@imperial.ac.uk](mailto:a.wheelock@imperial.ac.uk)  
35

36  
37 Word count: 6,716  
38

39  
40 Keywords – Influenza, vaccine, adult, beliefs, perceptions, behaviour  
41

42  
43 The Corresponding Author has the right to grant on behalf of all authors and does grant on  
44 behalf of all authors, an exclusive licence (or non exclusive for government employees) on a  
45 worldwide basis to the BMJ Publishing Group Ltd and its Licensees to permit this article (if  
46 accepted) to be published in BMJ editions and any other BMJ PGL products and sublicences  
47 to exploit all subsidiary rights, as set out in their licence  
48  
49

50  
51 (<http://resources.bmj.com/bmj/authors/checklists-forms/licence-for-publication>).  
52  
53  
54  
55  
56  
57  
58  
59  
60

## ABSTRACT

**Objectives:** Despite continuous efforts to improve influenza vaccination coverage, uptake among high-risk groups remains suboptimal. We aimed to identify policy amenable factors associated with vaccination and to measure their importance in order to assist in the monitoring of vaccination sentiment and the design of communication strategies and interventions to improve vaccination rates.

**Setting:** The US, the UK and France.

**Participants:** A total of 2,412 participants were surveyed across the three countries.

**Outcome measures:** Self-reported influenza vaccination.

**Methods:** Between March and April 2014, a stratified random sampling strategy was employed with the aim of obtaining nationally representative samples in the US, the UK and France through online databases and random-digit dialling. Participants were asked about vaccination practices, perceptions and feelings. Multivariable logistic regression was used to identify factors associated with past influenza vaccination.

**Results:** The models were able to explain 64-80% of the variance in vaccination behaviour. Overall, socio-psychological variables, which are inherently amenable to policy, were better at explaining past vaccination behaviour than demographic, socio-economic and health variables. Explanatory variables included social influence (physician), influenza and vaccine risk perceptions and traumatic childhood experiences.

**Conclusions:** Our results indicate that evidence-based socio-psychological items should be considered for inclusion into national immunisation surveys to gauge the public's views, identify emerging concerns, and thus proactively and opportunistically address potential barriers and harness vaccination drivers.

## ARTICLE SUMMARY

### Strengths and limitations of this study

- We generated regression models comprised of a broad set of variables, most of which have been linked to vaccination behaviour.
- We also aimed to use representative samples of the population of interest in three different developed countries (the US, the UK and France).
- The employed survey measures concerned the individual and conditioned perceptions on their vaccination status.
- Our research may have suffered from respondent-related biases. For example, people for whom vaccination issues are particularly salient may have been more prone to participate.

## BACKGROUND

Upper respiratory tract infections are a leading cause of mortality and morbidity in high-income countries, mostly among adults<sup>1</sup>. Influenza is a major contributor to this burden of disease; estimates show that up to 49,000 people die every year in the US<sup>2</sup> and 40,000 in the European Union<sup>3</sup> from influenza-related illness.

In most developed economies, an annual influenza vaccine is recommended and offered free of charge to those at higher risk of death from influenza complications, including pregnant women, individuals with eligible chronic illnesses and people aged 65 years and older. The vaccine is also available at a cost – usually in pharmacies or private healthcare facilities – to those who do not belong to a risk-group, but wish to protect themselves. In the US, for example, where the vaccine is recommended to all adults, approximately one third of healthy adults under 65 years old vaccinate against influenza every year<sup>4</sup>.

Despite continuous efforts to improve influenza vaccination coverage, uptake among high-risk groups remains low. In 2013/2014, for example, 65% of older adults ( $\geq 65$ s) and 46% of younger adults with eligible health conditions were vaccinated against influenza in the US<sup>4</sup>. In the same season, vaccination rates in the UK, one of the highest in Europe, were 73% in  $\geq 65$ s and 53% in eligible under 65s, both below the minimum 75% coverage recommended by the World Health Organisation<sup>5,6</sup>. Worryingly, a 151% rise in excess winter deaths in England and Wales in 2014/15, partly attributed to the circulation of a mutated A(H3N2) influenza strain which made the vaccine significantly less effective<sup>7</sup>, alongside unseasonable warm weather in 2015/2016, resulted in the lowest vaccination uptake in more than a decade<sup>8</sup>.

Vaccination decisions are shaped by a myriad factors, including demographic, socio-economic and socio-psychological factors<sup>9-12</sup>. The latter are of particular interest, given that they are inherently amenable to policy and interventions to change behaviour. Yet, few countries routinely collect data on people's beliefs and perceptions towards vaccination, and those that do often use one open question (e.g. "Why didn't you get a flu shot last winter?")<sup>13</sup>. Although cheaper and easier to administer, this form of enquiry does not take into account people's tendency to fall back on readily available information (e.g. the first thought that comes to mind) or report post-decisional rationalisations of their behaviours (e.g. "I did not

1  
2  
3 vaccinate, hence it must not be necessary”) rather than actual drivers<sup>14,15</sup>. Moreover, these  
4 data do not allow comparative analyses between vaccinated and unvaccinated people.  
5  
6

7  
8 Multilateral efforts to measure and improve confidence in vaccines are gathering pace<sup>16,17</sup>,  
9 yet they are built upon a body of evidence which, although extensive and insightful, has a  
10 number of gaps. One key limitation is that many studies evaluating the link between socio-  
11 psychological factors and influenza vaccination do not use multivariable analysis, thus the  
12 importance of a given variable in relation to others often remains unknown. Studies that do  
13 employ multivariable analysis seldom perform (or report) robustness checks and usually  
14 comprise a limited number of variables, which can result in omitted-variable bias, whereby  
15 the model compensates for the missing variables by over or underestimating the effect of the  
16 included variables<sup>9,18-19</sup>. For example, omitted-variable bias could explain why the model  
17 developed by Weinstein et al. – comprised of seven variables – showed that anticipated regret  
18 of not vaccinating was more important than other established influenza perceptions or why  
19 they did not find an association between vaccine effectiveness and vaccination uptake in this  
20 US sample<sup>18</sup>. Moreover, these studies frequently include proxies of vaccination uptake, such  
21 as historical vaccination (i.e. vaccination in previous seasons not including the most recent)  
22 in the case of retrospective studies or intention to vaccinate in the case of prospective studies,  
23 as independent variables<sup>9,19,20</sup>, thereby artificially boosting the explanatory ability of the  
24 model – because most people who vaccinate against influenza do so periodically – without  
25 necessarily explaining vaccination behaviour (e.g. people vaccinate because they feel  
26 vulnerable and/or receive a reminder from their GP every winter). As Brewer and colleagues  
27 note, other important methodological shortcomings are the prevalent use of weak survey  
28 measures (e.g. generic risk perceptions rather than own perceived risk) and small  
29 convenience samples, which may affect the validity and generalisability of findings<sup>11</sup>. A  
30 related drawback is that most of the evidence in this area is produced in the US, thus  
31 important contextual issues remain unexplored. Furthermore, vaccination coverage and  
32 factors underpinning uptake among healthy adults are often unknown.  
33  
34  
35  
36  
37  
38  
39  
40  
41  
42  
43  
44  
45  
46  
47  
48  
49

50  
51 We sought to address these limitations by generating regression models comprised of a broad  
52 set of variables, most of which have been linked to vaccination behaviour, by employing  
53 measures that gauge individuals’ own perceived risk (e.g. “The flu could make *me* severely  
54 ill”) and condition their perceptions upon having or not having received the vaccine (e.g.  
55 “*With no flu vaccine*, I would feel very vulnerable to the flu”)<sup>11</sup>, and aiming to use  
56  
57  
58  
59  
60

1  
2  
3 representative samples of the population of interest in three different developed countries: the  
4 US, the UK and France. In order to assist in the monitoring of vaccination sentiment and the  
5 prioritisation and design of communication strategies and interventions to increase influenza  
6 vaccination across different contexts, this study aimed to answer three research questions: (1)  
7  
8 What are the variables that consistently explain recent influenza vaccination uptake? (2)  
9  
10 What is the importance of policy amenable factors in relation to demographic, socio-  
11 economic and health characteristics in explaining past vaccination behaviour? (3) Are the  
12 factors associated with influenza vaccination comparable across countries?  
13  
14  
15  
16

## 17 18 **METHODS**

### 19 20 21 **Study sample**

22  
23  
24 Using stratified random sampling, we aimed to survey nationally representative adult samples  
25 from the US, the UK and France, about vaccination between March and April of 2014.  
26 Interlocking quotas based on gender, age and income were set. In addition, to ensure national  
27 representativeness, regional, settlement type (rural / urban) and ethnicity non-interlocking  
28 quotas were put in place.  
29  
30  
31  
32

33  
34 Since some of the included variables had not been previously tested and others were not  
35 consistently correlated with vaccination in previous studies, we assumed that the correlation  
36 coefficient between dependent and independent variables was 0.1 (a small effect size), the  
37 minimum sample was calculated to be 782 subjects per country ( $\alpha=0.05$ ;  $1-\beta=80\%$ ) with  
38 PASS version 11.  
39  
40  
41  
42

43  
44 The American Institutes for Research (US) and the Imperial College Research Ethics  
45 Committee (UK) granted research ethics approval. The French *Commission nationale de*  
46 *l'informatique et des libertés* and *Comités de protection des personnes* granted waivers to  
47 approval. Participants were informed about the nature of the study and provided consent.  
48  
49  
50  
51

### 52 53 **Procedure**

54  
55  
56 A market research company (Double Helix) was responsible for piloting, programming the  
57 online survey and conducting the telephone interviews. Ten pilot interviews (seven face-to-  
58  
59  
60

1  
2  
3 face and three telephone interviews) were conducted with purposively selected participants in  
4 the UK to test the survey's face and content validity, and ease of completion. Additionally, 10  
5 pilot interviews were conducted over the phone in the US and 10 in France with the aid of a  
6 screen sharing platform. Interviews were conducted by a trained researcher while the rest of  
7 the team observed via live broadcast. The pilot showed the survey was easy to complete and  
8 understand, and lasted approximately 20 minutes. The refinements to the study materials  
9 were related to wording and format. Self-completion online surveys were then sent to a non-  
10 probability online panel and random-digit dialling was employed to recruit a proportion of  
11 the 65+ age category and those belonging to D/E socio-economic groups, due to their limited  
12 access to or lack of familiarity with internet-based applications<sup>21</sup> (see Box S1 in  
13 Supplementary material for more details about non-probability online panels).  
14  
15  
16  
17  
18  
19  
20  
21  
22

23 As a quality control measure, participants classified as 'speeders' (completed the survey in  
24 half of the average length – 16 minutes) and 'flat-liners' (gave homogenous responses and  
25 completed the survey in less than half of the optimum survey length – 20 minutes) were  
26 removed and replaced<sup>22</sup>.  
27  
28  
29  
30

### 31 **Instrument**

32  
33  
34 The measures reported here are a subset of a larger vaccination survey (available from the  
35 authors upon request). Our analyses included 32-34 items (Table S1 in Supplementary  
36 material). We selected socio-psychological items that had been linked to influenza  
37 vaccination based on existing evidence. These comprised adapted constructs from the Health  
38 Belief Model<sup>23</sup> and Protection Motivation Theory<sup>24</sup> – notably, influenza and vaccine risk  
39 perceptions, vaccine effectiveness and self-efficacy<sup>9-12, 25</sup> –, perceived knowledge of the  
40 vaccine<sup>10</sup> and items assessing trust in key vaccination stakeholders<sup>26</sup>. Additional policy  
41 amenable factors which had infrequently been used in the context of vaccination, but were  
42 considered potential explanatory variables, were also tested. These were worry of infecting  
43 other people (if unvaccinated)<sup>27</sup> – a measure aimed at evaluating the extent to which people  
44 vaccinate to protect others –, perceived control over influenza<sup>28, 29</sup>, regret of contracting  
45 influenza<sup>30</sup>, childhood traumatic health experiences<sup>31</sup> – to evaluate their influence on adult  
46 vaccination behaviour – and health decision-making preferences<sup>32, 33</sup> – to further explore the  
47 effect of the doctor-patient relationship on vaccination acceptance. Participants' socio-  
48  
49  
50  
51  
52  
53  
54  
55  
56  
57  
58  
59  
60



1  
2  
3 economic, demographic and health characteristics previously associated with influenza  
4 vaccination were prioritised<sup>9, 34</sup>.  
5  
6  
7

8 We used 11-points likert scales (0-10) for the majority of socio-psychological items, as these  
9 are recognised for their reliability and ease of completion<sup>35</sup>, and multiple-choice items and  
10 alternate-choice items when appropriate. Except for trust, health decision-making  
11 preferences, and childhood traumatic health experiences items, socio-psychological measures  
12 were disease or vaccine-specific to avoid misinterpretation. As illustrated in the introduction,  
13 our questions also aimed to capture the respondent's perception of their own personal risk  
14 rather than their views on risk of illness in the wider population. Thus, we asked how likely it  
15 is that they might become ill rather than how likely people generally are to get influenza. We  
16 also wished to specifically focus their attention on the risk of influenza in the presence or  
17 absence of vaccination, as people may feel more or less protected depending upon their  
18 vaccination status. The questions were therefore in the form of 'Without a vaccine, it is likely  
19 I will get the flu' rather than simply assessing their views on the likelihood of getting  
20 influenza. Finally, when thematic hierarchy (e.g. from general to specific) was not important,  
21 items were rotated to minimise response bias.  
22  
23  
24  
25  
26  
27  
28  
29  
30  
31

### 32 **Data analysis**

33  
34  
35  
36 We used the following formula to calculate response rates: number of surveys completed  
37 divided by sent emails or interviews attempted minus ineligible individuals, multiplied by  
38 100. Descriptive statistics, Pearson's Chi-square and t-tests were computed to explore the  
39 relationships between the assessed variables and self-reported past vaccination behaviour.  
40 Point-biserial correlations were calculated and Chi-square statistics were converted into  
41 correlation coefficients to explore whether the relationship between the dependent and  
42 independent variables matched or exceeded a coefficient of 0,1 – the assumption employed to  
43 calculate the sample size. Cronbach's alpha was used to explore the reliability of the  
44 proposed measures across countries. The outcome measure was receiving an influenza  
45 vaccine in the last 6 months (2013/2014 influenza season).  
46  
47  
48  
49  
50  
51  
52

53  
54 Given that the dependent variable was binary, logistic regression analysis was conducted to  
55 identify the variables associated with past influenza vaccination. Four continuous variables  
56 with "I don't know/not applicable" responses were dichotomised as follows: values  
57  
58  
59  
60

1  
2  
3 expressing agreement with a given statement (6-10) were coded as 1 = “yes” and the rest (0-5  
4 and “I don’t know/not applicable”) were coded as 0 = “other than yes” (see Tables S2-S4 in  
5 Supplementary material).  
6  
7

8  
9  
10 Although a software-based stepwise approach is widely used in logistic regression, in recent  
11 years the purposeful selection of variables has been favoured over deterministic model-  
12 building methods. This is because the latter tend to rely on automatic selection of variables  
13 based only upon mathematical criteria, which can lead to over-fitting or under-fitting models.  
14 Therefore, we used a manual stepwise, hierarchical approach, whereby blocks of variables  
15 were entered in a sequence based upon previous evidence and our aim of assessing the  
16 importance of policy amenable factors in explaining influenza vaccination (see Box S2 in  
17 Supplementary material for a full description of the approach)<sup>36</sup>.  
18  
19  
20  
21  
22  
23

24 Two goodness-of-fit tests – chi-square and Nagelkerke  $R^2$  – were used to assess the overall  
25 model (M1) and each of the 7 models (blocks) generated using the hierarchical approach.  
26 Employing a classification cut-off point of 0.5, a final model with a Nagelkerke  $R^2$  value  
27 close to 1, which indicates optimal model fit, was sought.  
28  
29  
30  
31  
32

33 Thorough checks to ensure the robustness of the models were conducted, including variance  
34 inflation factor (VIF) to assess collinearity, standardised residuals to detect and evaluate  
35 outliers and Cook’s distance to identify influential cases. Separate analyses entering the  
36 blocks of variables in reverse order were also performed (i.e. from block 7 to block 1) to  
37 evaluate whether the order in which variables were entered significantly modified our results.  
38 Data were analysed using IBM SPSS Statistics version 22.  
39  
40  
41  
42  
43

## 44 **RESULTS**

### 45 **Participants**

46  
47  
48 The online survey was completed by 814 participants in the US, 791 in the UK and 787 in  
49 France. Online response rates were low (US=1%; UK=1,7%; France=2,4%), albeit consistent  
50 with research on non-probability online panels showing that, in recent years, response rates  
51 have fallen to a point where in many cases they are 10% or less<sup>37</sup>. Eighty participants were  
52 interviewed via the telephone in the US, 100 in the UK and 100 in France. Telephone  
53  
54  
55  
56  
57  
58  
59  
60

1  
2  
3 response rates were 6-9%. Telephone interviews targeted older people and those belonging  
4 to low socio-economic strata, two populations with particularly low response rates<sup>38</sup>.  
5  
6 Recruitment flow diagrams for the online and telephone samples are presented in Figures  
7 S1a-S3a and S1b-S3b, respectively (Supplementary material). Except for education in the US  
8 – the sample was more educated than the general population –, there were no significant  
9 differences between the characteristics of the final samples (US=801; UK=806; France=805;  
10 total sample N=2,412) and those of the general population, when available (Table 1). To  
11 facilitate survey completion and improve data accuracy, household income data for this study  
12 was collected using a limited number of bands relevant to each country. Therefore, it cannot  
13 be directly compared against census data, which collects more granular income information  
14 per household. However, we have used as a reference the band that most approximate to the  
15 census median household income (Table 1). In the US and the UK, roughly half of the sample  
16 was below the reference band and the other half was above; whereas in France, the number  
17 of participants who reported a household income below the median was substantially higher  
18 than those over the median (Table 1).  
19  
20  
21  
22  
23  
24  
25  
26  
27

28  
29  
30 Healthcare professionals were excluded from the final samples as their decision-making  
31 processes are influenced by those they care for or regulated by healthcare authorities, thus  
32 some of their motivations and concerns may differ from those of the general population<sup>39</sup>.  
33 Subgroup analyses confirmed these differences (available upon request).  
34  
35  
36  
37

### 38 **Differences between vaccinated and non-vaccinated participants**

39  
40  
41 Overall, the responses of vaccinated and unvaccinated participants were significantly  
42 different ( $p < 0.05$ - $0.001$ ) and comparable across countries (Tables S2-S4 in Supplementary  
43 material). Those who had received an influenza vaccine were older, reported having an  
44 eligible health condition, had a private or public health insurance, lived with a partner  
45 (US/France), were wealthier (US/France) and more educated (US). They were also less  
46 constrained by practical barriers and more likely to report that their physician and relatives  
47 thought they should vaccinate than those who had not received a vaccine. Vaccinated  
48 participants were more concerned about the risks of influenza, less worried about the risks of  
49 the vaccine and more trusting of vaccine manufacturers and providers than unvaccinated  
50 participants. Vaccinees reported possessing a better understanding of the influenza vaccine  
51  
52  
53  
54  
55  
56  
57  
58  
59  
60

**Table 1.** Participant characteristics

| Characteristic                       | Categories                | US (N=801) <sup>1</sup> |                          | UK (N=806) <sup>2</sup> |                          | France (N=805) <sup>3</sup> |                          |
|--------------------------------------|---------------------------|-------------------------|--------------------------|-------------------------|--------------------------|-----------------------------|--------------------------|
|                                      |                           | Sample                  | Population               | Sample                  | Population               | Sample                      | Population               |
| Gender                               | Female                    | 50%                     | 51%                      | 52%                     | 51%                      | 53%                         | 52%                      |
| Age                                  | 18-64                     | 80%                     | 80%                      | 77%                     | 77%                      | 76%                         | 76%                      |
|                                      | ≥65                       | 20%                     | 20%                      | 23%                     | 23%                      | 24%                         | 24%                      |
| Ethnicity                            | White                     | 69%                     | 78%                      | 88%                     | 87%                      | -                           | -                        |
|                                      | Other                     | 30%                     | 22%                      | 11%                     | 13%                      | -                           | -                        |
|                                      | Prefer not to say         | 1%                      | -                        | 1%                      | -                        | -                           | -                        |
| Annual household income <sup>a</sup> | <\$50,000/£20,000/€26,000 | 43%                     | -                        | 46%                     | -                        | 53%                         | -                        |
|                                      | ≥\$50,000/£20,000/€26,000 | 49%                     | -                        | 46%                     | -                        | 34%                         | -                        |
|                                      | Prefer not to say         | 8%                      | -                        | 9%                      | -                        | 13%                         | -                        |
| Marital status                       | Living as a couple        | 60%                     | Unavailable <sup>b</sup> | 56%                     | 58%                      | 54%                         | Unavailable <sup>c</sup> |
|                                      | Not living as a couple    | 39%                     | Unavailable <sup>b</sup> | 44%                     | 42%                      | 45%                         | Unavailable <sup>c</sup> |
|                                      | Prefer not to say         | 1%                      | -                        | 1%                      | -                        | 1%                          | -                        |
| Education                            | No university degree      | 49%                     | 71%                      | 60%                     | 73%                      | 64%                         | 76%                      |
|                                      | University degree         | 45%                     | 29%                      | 37%                     | 27%                      | 29%                         | 24%                      |
|                                      | Prefer not to say         | 5%                      | -                        | 3%                      | -                        | 7%                          | -                        |
| Settlement type                      | Urban                     | 76%                     | 81%                      | 77%                     | 81%                      | 78%                         | 78%                      |
|                                      | Rural                     | 24%                     | 19%                      | 23%                     | 19%                      | 22%                         | 22%                      |
| Vaccination status                   | <65 vaccinated            | 43%                     | 37%                      | 27%                     | Unavailable <sup>d</sup> | 16%                         | Unavailable <sup>e</sup> |
|                                      | ≥65 vaccinated            | 66%                     | 65%                      | 75%                     | 73%                      | 50%                         | 53%                      |

<sup>1</sup>Population estimates for gender, age, ethnicity, income, marital status, education and settlement type are 2012/2013 estimates from the US Census Bureau<sup>40</sup>. Influenza vaccination status is from the 2013/2014 season<sup>4</sup>. <sup>a</sup>The reference income band was the closest to the US 2012/2013 median household income (\$53,046)<sup>40</sup>. <sup>b</sup>Census data only includes persons who are married with spouse present, married with spouse absent and separated (42%).

<sup>2</sup>Population estimates for gender, age, ethnicity, marital status, education and settlement type are 2011 and 2012/2013 estimates from the UK Office for National Statistics<sup>41,42</sup>. Influenza vaccination status is from the 2013/2014 season<sup>5</sup>. <sup>d</sup>Available data for <65s include children. <sup>a</sup>The reference income band was the closest to the UK 2012/2013 median household income (£22,880)<sup>43</sup>.

<sup>3</sup>Population estimates for gender, age, income, marital status, education and settlement type are 2011 and 2012/2013 estimates from France's National Institute of Statistics and Economic Studies<sup>44</sup>. Ethnicity was not collected due to country-specific data protection restrictions. Influenza vaccination status is from the 2013/2014 season<sup>45</sup>. <sup>e</sup>Available data for <65s include children. <sup>a</sup>The reference income band was the closest to France's 2012/2013 median household income (€29,330)<sup>44</sup>. <sup>c</sup>Census data only includes people who are legally married (49%).

Note: Differences between samples and populations were evaluated using Fisher's Exact test. Except for education in the US (p<0.001), we found no significant differences. Percentages may not total 100 due to rounding.

1  
2  
3 and were more prone to let physicians make decisions about their health (US/UK) than those  
4 who had not vaccinated. Lastly, vaccinated participants were less likely to have had a bad  
5 vaccine or injection-related experience (UK) and more likely to have had a scary health-  
6 related experience in childhood than unvaccinated participants.  
7  
8  
9

### 10 11 **Factors associated with past influenza vaccination in regression analyses** 12

13  
14  
15 When all variables were assessed concurrently, the models that best fitted the data (M6-M8)  
16 explained 73% of the variance in past vaccination behaviour in the US, 80% in the UK and  
17 64% in France (Nagelkerke  $R^2 = 0.644-0.795$ ) (Tables 2-4). The first models (M1) included  
18 all the variables, thus were less parsimonious than M6-M8, yet they explained a similar share  
19 of the variance (66-80%). When using the hierarchical approach, the first-step models (M2),  
20 which included demographic, socio-economic and health variables, fitted the data poorly-to-  
21 moderately and accounted for 22% the variance in past vaccination behaviour in the US, 38%  
22 in the UK and 19% in France. Practical barriers only explained 3% of the variance in the US  
23 (M3) and were not significant in the UK and France. Social influence explained 14% of the  
24 variance in the US (M4), 21% in UK and 25% in France (M3). Influenza perceptions  
25 accounted for 30% of past vaccination behaviour in the US (M5), 17% in the UK and 18% in  
26 France (M4), whereas influenza vaccine perceptions only explained 1% of this behaviour in  
27 the US (M6), 2% in the UK and 1% in France (M5). Finally, trust items explained less than  
28 1% of the variance in the US, whilst decision-making preferences and childhood experiences  
29 explained 2% of the variance in the UK and 1% in France.  
30  
31  
32  
33  
34  
35  
36  
37  
38  
39  
40

41  
42 When blocks were entered in reverse order, demographic, socio-economic and health  
43 variables contributed little to the variance in past vaccination behaviour – 3% (US), 1% (UK)  
44 and 0% (France). This is not surprising, since people's characteristics have an effect on their  
45 perceptions, thus they explain some of the same variance. This result further proves that  
46 poorly specified models – which are not evidence-based – lead to biased estimates (the  
47 detailed results of these analyses are available from the corresponding author upon request).  
48  
49  
50  
51  
52

53  
54 Robustness checks showed that the variables which were significant in M1, remained  
55 significant across most 11-21 specifications, with some exceptions. In the US, “vaccine is  
56 painful” became non-significant when non-significant influenza perceptions were removed.  
57 This suggests that the latter had a suppressor effect on the former, i.e. their inclusion  
58  
59  
60

**Table 2** Factors associated with past influenza vaccination in regression analysis – US

| Variables                               | M1       |       | M2       |       | M3       |       | M4       |       | M5       |       | M6       |       | M7       |       | M8              |       |
|-----------------------------------------|----------|-------|----------|-------|----------|-------|----------|-------|----------|-------|----------|-------|----------|-------|-----------------|-------|
|                                         | OR       | SE    |          |       | OR       | SE    | OR              | SE    |
| Age                                     | 1.019    | 0.458 | 1.369    | 0.271 | 1.210    | 0.275 | 1.116    | 0.292 | 1.230    | 0.396 | 1.006    | 0.443 | 1.093    | 0.441 | 1.057           | 0.446 |
| <b>Eligible health condition</b>        | 2.528**  | 0.329 | 3.050*** | 0.204 | 3.079*** | 0.208 | 2.469*** | 0.222 | 2.145**  | 0.296 | 2.549**  | 0.320 | 2.531**  | 0.320 | <b>2.531**</b>  | 0.323 |
| <b>Private insurance</b>                | 3.463*** | 0.386 | 2.833*** | 0.242 | 2.611*** | 0.246 | 2.197**  | 0.265 | 2.394**  | 0.337 | 3.062**  | 0.367 | 3.269*** | 0.372 | <b>3.374***</b> | 0.377 |
| <b>Public insurance</b>                 | 4.507*** | 0.415 | 3.461*** | 0.258 | 3.143*** | 0.262 | 2.542*** | 0.282 | 3.163*** | 0.362 | 4.137*** | 0.391 | 4.158*** | 0.391 | <b>4.273***</b> | 0.397 |
| Gender                                  | 0.916    | 0.269 | 0.913    | 0.166 | 0.948    | 0.171 | 0.859    | 0.185 | 0.907    | 0.240 | 0.931    | 0.253 | 0.867    | 0.257 | 0.898           | 0.259 |
| Marital status                          | 0.672    | 0.294 | 1.093    | 0.185 | 1.062    | 0.188 | 1.032    | 0.204 | 0.890    | 0.266 | 0.743    | 0.281 | 0.759    | 0.283 | 0.728           | 0.286 |
| <b>Income</b>                           | 1.146*   | 0.074 | 1.198*** | 0.046 | 1.166**  | 0.049 | 1.140**  | 0.052 | 1.145**  | 0.067 | 1.143*   | 0.070 | 1.130*   | 0.070 | <b>1.145*</b>   | 0.070 |
| Education                               | 1.052    | 0.095 | 0.740    | 0.182 | 1.036    | 0.062 | 0.983    | 0.067 | 1.025    | 0.088 | 1.046    | 0.093 | 1.042    | 0.093 | 1.035           | 0.093 |
| Ethnicity                               | 0.664    | 0.287 | 1.369*   | 0.271 | 0.681**  | 0.186 | 0.665**  | 0.202 | 0.681    | 0.254 | 0.677    | 0.266 | 0.695    | 0.270 | 0.693           | 0.271 |
| Vaccine access                          | 1.277    | 0.384 |          |       |          |       |          |       |          |       |          |       |          |       |                 |       |
| <b>Time to vaccinate</b>                | 2.182**  | 0.356 |          |       | 2.804*** | 0.220 | 2.565*** | 0.239 | 2.417**  | 0.303 | 2.194**  | 0.319 | 2.535**  | 0.329 | <b>2.432**</b>  | 0.331 |
| <b>Physician's opinion</b>              | 4.361*** | 0.345 |          |       |          |       | 6.909*** | 0.211 | 2.946*** | 0.276 | 3.700*** | 0.309 | 4.260*** | 0.322 | <b>4.285***</b> | 0.321 |
| Relatives' opinion                      | 0.866    | 0.312 |          |       |          |       |          |       |          |       |          |       |          |       |                 |       |
| <b>Vulnerable to influenza</b>          | 1.335*** | 0.069 |          |       |          |       |          |       | 1.359*** | 0.056 | 1.291*** | 0.059 | 1.284*** | 0.059 | <b>1.290***</b> | 0.060 |
| Susceptible to influenza                | 1.013    | 0.056 |          |       |          |       |          |       |          |       |          |       |          |       |                 |       |
| <b>Likelihood of catching influenza</b> | 1.235*** | 0.060 |          |       |          |       |          |       | 1.238*** | 0.049 | 1.238*** | 0.055 | 1.226*** | 0.056 | <b>1.216***</b> | 0.056 |
| Severity of influenza (bed days)        | 1.121    | 0.126 |          |       |          |       |          |       |          |       |          |       |          |       |                 |       |
| <b>Severity of influenza</b>            | 0.908*   | 0.061 |          |       |          |       |          |       | 0.911*   | 0.051 | 0.902*   | 0.055 | 0.909*   | 0.055 | <b>0.903**</b>  | 0.055 |
| Fear of influenza                       | 0.973    | 0.063 |          |       |          |       |          |       |          |       |          |       |          |       |                 |       |
| Worry of transmitting influenza         | 0.932    | 0.056 |          |       |          |       |          |       |          |       |          |       |          |       |                 |       |
| <b>Perceived control over influenza</b> | 0.752*** | 0.056 |          |       |          |       |          |       | 0.741*** | 0.047 | 0.757*** | 0.052 | 0.748*** | 0.052 | <b>0.744***</b> | 0.052 |
| <b>Regret of catching influenza</b>     | 1.165**  | 0.054 |          |       |          |       |          |       | 1.112**  | 0.043 | 1.117**  | 0.049 | 1.126**  | 0.049 | <b>1.122**</b>  | 0.050 |
| <b>Perceived knowledge of vaccine</b>   | 0.406**  | 0.390 |          |       |          |       |          |       |          |       | 0.368**  | 0.361 | 0.368**  | 0.366 | <b>0.388**</b>  | 0.367 |
| <b>Effectiveness vaccine</b>            | 1.249*** | 0.066 |          |       |          |       |          |       |          |       | 1.188**  | 0.062 | 1.222**  | 0.064 | <b>1.225***</b> | 0.064 |
| <b>Vaccine transmits influenza</b>      | 0.848**  | 0.054 |          |       |          |       |          |       |          |       | 0.827*** | 0.046 | 0.835*** | 0.046 | <b>0.836***</b> | 0.047 |
| Vaccine contents are dangerous          | 0.961    | 0.055 |          |       |          |       |          |       |          |       |          |       |          |       |                 |       |

|                                        |               |              |       |       |       |        |       |                |              |                |              |
|----------------------------------------|---------------|--------------|-------|-------|-------|--------|-------|----------------|--------------|----------------|--------------|
| Vaccine is painful                     | 1.775*        | 0.329        |       |       |       | 1.712* | 0.304 | 1.585          | 0.309        | 1.558          | 0.310        |
| Vaccine-related self-efficacy          | 1.010         | 0.053        |       |       |       |        |       |                |              |                |              |
| <b>Trust in physician (scale)</b>      | <b>0.836*</b> | <b>0.096</b> |       |       |       |        |       | <b>0.796**</b> | <b>0.090</b> | <b>0.809**</b> | <b>0.091</b> |
| Trust in manufacturers                 | 0.895         | 0.081        |       |       |       |        |       |                |              |                |              |
| Trust in health authorities            | 1.013         | 0.086        |       |       |       |        |       |                |              |                |              |
| Shared decision-making doctor          | 0.953         | 0.147        |       |       |       |        |       |                |              |                |              |
| Bad experience vaccines - child        | 1.449         | 0.417        |       |       |       |        |       |                |              |                |              |
| <b>Scary health experience - child</b> | <b>2.126*</b> | <b>0.464</b> |       |       |       |        |       |                |              | <b>2.153*</b>  | <b>0.450</b> |
| Number of participants                 | 724           | 724          | 724   | 724   | 724   | 724    | 724   | 724            | 724          | 724            | 724          |
| Nagelkerke R                           | 0.734         | 0.215        | 0.252 | 0.389 | 0.686 | 0.719  | 0.725 | 0.727          |              |                |              |

OR = Odds ratio; p = p-value; SE = standard error; \*p < 0.1, \*\*p < 0.05, \*\*\*p < 0.001. The change in model fit indicated by chi-square test for each block of variables was always significant (p < 0.1).



**Table 3** Factors associated with past influenza vaccination in regression analysis – UK

| Variables                               | M1       |       | M2       |       | M3       |       | M4       |       | M5       |       | M6              |       |
|-----------------------------------------|----------|-------|----------|-------|----------|-------|----------|-------|----------|-------|-----------------|-------|
|                                         | OR       | SE    | OR              | SE    |
| Age                                     | 2.044    | 0.437 | 6.204*** | 0.238 | 3.560*** | 0.277 | 2.231**  | 0.389 | 1.786    | 0.399 | 1.919           | 0.421 |
| <b>Eligible health condition</b>        | 4.088*** | 0.413 | 8.627*** | 0.226 | 4.002*** | 0.260 | 4.107*** | 0.343 | 4.215*** | 0.368 | <b>4.351***</b> | 0.393 |
| <b>Private insurance</b>                | 3.115**  | 0.472 | 1.864**  | 0.280 | 1.855*   | 0.332 | 2.858**  | 0.412 | 3.227**  | 0.429 | <b>2.871**</b>  | 0.451 |
| <b>Gender</b>                           | 0.629    | 0.321 | 0.611**  | 0.188 | 0.677*   | 0.222 | 0.508**  | 0.286 | 0.475**  | 0.298 | <b>0.580*</b>   | 0.312 |
| <b>Marital status</b>                   | 2.018**  | 0.337 | 1.993*** | 0.207 | 1.795**  | 0.244 | 1.897**  | 0.303 | 1.908**  | 0.314 | <b>1.897**</b>  | 0.323 |
| Income                                  | 0.918    | 0.105 | 0.946    | 0.062 | 0.967    | 0.072 | 0.943    | 0.089 | 0.905    | 0.096 | 0.906           | 0.100 |
| Education                               | 0.962    | 0.103 | 0.979    | 0.061 | 0.966    | 0.072 | 0.981    | 0.089 | 0.947    | 0.094 | 0.976           | 0.098 |
| Ethnicity                               | 1.768    | 0.478 | 0.877    | 0.305 | 1.549    | 0.361 | 1.953    | 0.423 | 1.695    | 0.452 | 1.757           | 0.464 |
| Vaccine access                          | 1.380    | 0.457 |          |       |          |       |          |       |          |       |                 |       |
| Time to vaccinate                       | 1.295    | 0.427 |          |       |          |       |          |       |          |       |                 |       |
| <b>Physician's opinion</b>              | 3.447*** | 0.371 |          |       | 7.751*** | 0.247 | 4.296*** | 0.331 | 2.962**  | 0.347 | <b>3.097**</b>  | 0.359 |
| <b>Relatives' opinion</b>               | 2.205**  | 0.355 |          |       | 3.061*** | 0.245 | 2.193**  | 0.316 | 2.195**  | 0.333 | <b>2.103**</b>  | 0.344 |
| <b>Vulnerable to influenza</b>          | 1.183**  | 0.081 |          |       |          |       | 1.268*** | 0.071 | 1.264**  | 0.075 | <b>1.233**</b>  | 0.076 |
| <b>Susceptible to influenza</b>         | 0.889*   | 0.066 |          |       |          |       | 0.863**  | 0.058 | 0.904*   | 0.061 | <b>0.882**</b>  | 0.063 |
| <b>Likelihood of catching influenza</b> | 1.355*** | 0.078 |          |       |          |       | 1.214**  | 0.063 | 1.298*** | 0.070 | <b>1.311***</b> | 0.073 |
| <b>Severity of influenza (bed days)</b> | 1.317**  | 0.130 |          |       |          |       | 1.295**  | 0.116 | 1.277**  | 0.119 | <b>1.314**</b>  | 0.121 |
| Severity of influenza                   | 1.062    | 0.073 |          |       |          |       |          |       |          |       |                 |       |
| Fear of influenza                       | 0.970    | 0.068 |          |       |          |       |          |       |          |       |                 |       |
| <b>Worry of transmitting influenza</b>  | 0.872**  | 0.066 |          |       |          |       | 0.881**  | 0.059 | 0.865**  | 0.060 | <b>0.870**</b>  | 0.062 |
| <b>Perceived control over influenza</b> | 0.832**  | 0.064 |          |       |          |       | 0.787*** | 0.056 | 0.812*** | 0.058 | <b>0.811***</b> | 0.060 |
| <b>Regret of catching influenza</b>     | 1.324*** | 0.064 |          |       |          |       | 1.348*** | 0.057 | 1.301*** | 0.057 | <b>1.326***</b> | 0.060 |
| <b>Perceived knowledge of vaccine</b>   | 2.098*   | 0.410 |          |       |          |       |          |       | 2.123*   | 0.383 | <b>2.100*</b>   | 0.392 |
| Effectiveness of vaccine                | 1.112    | 0.077 |          |       |          |       |          |       |          |       |                 |       |
| <b>Vaccine transmits influenza</b>      | 0.901    | 0.066 |          |       |          |       |          |       | 0.873**  | 0.051 | <b>0.865**</b>  | 0.055 |
| Vaccine contents are dangerous          | 0.896    | 0.080 |          |       |          |       |          |       |          |       |                 |       |
| Vaccine is painful                      | 1.732    | 0.412 |          |       |          |       |          |       |          |       |                 |       |
| <b>Vaccine-related self-efficacy</b>    | 1.164*   | 0.082 |          |       |          |       |          |       | 1.203**  | 0.072 | <b>1.208**</b>  | 0.076 |



|                                        |         |       |       |       |       |                |       |
|----------------------------------------|---------|-------|-------|-------|-------|----------------|-------|
| Trust in physician (scale)             | 0.899   | 0.107 |       |       |       |                |       |
| Trust in manufacturers                 | 0.868   | 0.088 |       |       |       |                |       |
| Trust in health authorities            | 0.986   | 0.098 |       |       |       |                |       |
| <b>Shared decision-making doctor</b>   | 0.642** | 0.165 |       |       |       | <b>0.675**</b> | 0.158 |
| <b>Bad experience vaccines - child</b> | 0.252** | 0.557 |       |       |       | <b>0.267**</b> | 0.526 |
| <b>Scary health experience - child</b> | 3.434** | 0.496 |       |       |       | <b>3.254**</b> | 0.460 |
| Number of participants                 | 728     | 728   | 728   | 728   | 728   | 728            | 728   |
| Nagelkerke R                           | 0.798   | 0.378 | 0.589 | 0.759 | 0.777 | 0.795          |       |

OR = Odds ratio; p = p-value; SE = standard error; \*p < 0.1, \*\*p < 0.05, \*\*\*p < 0.001. The change in model fit indicated by chi-square test for each block of variables was always significant (p < 0.1).

**Table 4** Factors associated with past influenza vaccination in regression analysis – France

| Variables                               | M1       |       | M2       |       | M3       |       | M4       |       | M5       |       | M6       |       | M7              |       |
|-----------------------------------------|----------|-------|----------|-------|----------|-------|----------|-------|----------|-------|----------|-------|-----------------|-------|
|                                         | OR       | SE    | OR              | SE    |
| <b>Age</b>                              | 2.772**  | 0.342 | 4.544*** | 0.208 | 4.405*** | 0.209 | 2.861*** | 0.246 | 3.312*** | 0.293 | 3.193*** | 0.299 | <b>2.938***</b> | 0.302 |
| Eligible health condition               | 1.196    | 0.332 | 2.142*** | 0.212 | 2.154*** | 0.213 | 1.565*   | 0.248 | 1.173    | 0.295 | 1.215    | 0.300 | 1.087           | 0.309 |
| <b>Private insurance</b>                | 2.423*   | 0.493 | 1.525    | 0.353 | 1.484    | 0.355 | 1.499    | 0.397 | 2.221*   | 0.488 | 2.234    | 0.497 | <b>2.373*</b>   | 0.495 |
| Gender                                  | 1.281    | 0.292 | 0.766    | 0.196 | 0.764    | 0.197 | 0.944    | 0.228 | 1.089    | 0.265 | 1.169    | 0.270 | 1.207           | 0.275 |
| <b>Marital status</b>                   | 1.935**  | 0.316 | 1.236    | 0.216 | 1.245    | 0.216 | 1.251    | 0.246 | 1.872**  | 0.292 | 1.924**  | 0.297 | <b>1.970**</b>  | 0.301 |
| Income                                  | 1.106    | 0.121 | 1.148    | 0.085 | 1.140    | 0.085 | 1.159    | 0.097 | 1.056    | 0.111 | 1.056    | 0.112 | 1.066           | 0.114 |
| <b>Education</b>                        | 1.151    | 0.092 | 1.093    | 0.062 | 1.090    | 0.062 | 1.103    | 0.072 | 1.224*   | 0.086 | 1.201**  | 0.087 | <b>1.179*</b>   | 0.088 |
| Vaccine access                          | 0.501*   | 0.387 |          |       | 1.535*   | 0.252 | 1.211    | 0.283 | 0.849    | 0.333 | 0.726    | 0.338 | 0.650           | 0.343 |
| Time to vaccinate                       | 0.862    | 0.401 |          |       |          |       |          |       |          |       |          |       |                 |       |
| <b>Physician's opinion</b>              | 7.464*** | 0.352 |          |       |          |       | 13.69*** | 0.237 | 7.327*** | 0.275 | 6.904*** | 0.280 | <b>7.161***</b> | 0.288 |
| Relatives' opinion                      | 0.806    | 0.347 |          |       |          |       |          |       |          |       |          |       |                 |       |
| Vulnerable to influenza                 | 1.100    | 0.065 |          |       |          |       |          |       |          |       |          |       |                 |       |
| Susceptible to influenza                | 0.922    | 0.064 |          |       |          |       |          |       |          |       |          |       |                 |       |
| <b>Likelihood of catching influenza</b> | 1.231**  | 0.069 |          |       |          |       |          |       | 1.229*** | 0.053 | 1.252*** | 0.055 | <b>1.243***</b> | 0.056 |
| Severity of influenza (bed days)        | 1.077    | 0.137 |          |       |          |       |          |       |          |       |          |       |                 |       |
| Severity of influenza                   | 0.999    | 0.067 |          |       |          |       |          |       |          |       |          |       |                 |       |
| Fear of influenza                       | 0.986    | 0.058 |          |       |          |       |          |       |          |       |          |       |                 |       |
| Worry of transmitting influenza         | 1.077    | 0.064 |          |       |          |       |          |       |          |       |          |       |                 |       |
| <b>Perceived control over influenza</b> | 0.846**  | 0.054 |          |       |          |       |          |       | 0.812*** | 0.049 | 0.844*** | 0.050 | <b>0.836***</b> | 0.051 |
| <b>Regret of catching influenza</b>     | 1.319*** | 0.063 |          |       |          |       |          |       | 1.388*** | 0.051 | 1.364*** | 0.052 | <b>1.376***</b> | 0.053 |
| Perceived knowledge of vaccine          | 1.319    | 0.356 |          |       |          |       |          |       |          |       |          |       |                 |       |
| Effectiveness of vaccine                | 1.067    | 0.076 |          |       |          |       |          |       |          |       |          |       |                 |       |
| Vaccine transmits influenza             | 0.958    | 0.063 |          |       |          |       |          |       |          |       |          |       |                 |       |
| <b>Vaccine contents are dangerous</b>   | 0.871**  | 0.058 |          |       |          |       |          |       |          |       | 0.868**  | 0.046 | <b>0.852***</b> | 0.047 |
| Vaccine is painful                      | 0.869    | 0.465 |          |       |          |       |          |       |          |       |          |       |                 |       |
| Vaccine-related self-efficacy           | 1.006    | 0.065 |          |       |          |       |          |       |          |       |          |       |                 |       |

|                                        |                 |              |       |       |       |       |                |       |
|----------------------------------------|-----------------|--------------|-------|-------|-------|-------|----------------|-------|
| Trust in physician (scale)             | 1.005           | 0.105        |       |       |       |       |                |       |
| Trust in manufacturers                 | 0.955           | 0.086        |       |       |       |       |                |       |
| Trust in health authorities            | 0.900           | 0.089        |       |       |       |       |                |       |
| Shared decision-making doctor          | 0.997           | 0.164        |       |       |       |       |                |       |
| Bad experience vaccines - child        | 0.854           | 0.448        |       |       |       |       |                |       |
| <b>Scary health experience - child</b> | <b>4.139***</b> | <b>0.447</b> |       |       |       |       | <b>3.804**</b> | 0.429 |
| Number of participants                 | 699             | 699          | 699   | 699   | 699   | 699   | 699            | 699   |
| Nagelkerke R                           | 0.734           | 0.189        | 0.195 | 0.445 | 0.619 | 0.631 | 0.644          |       |

OR = Odds ratio; p = p-value; SE = standard error; \*p < 0.1, \*\*p < 0.05, \*\*\*p < 0.001. The change in model fit indicated by chi-square test for each block of variables was always significant (p < 0.1).

strengthened the effect of the variable in question<sup>45</sup>. In the UK, gender became significant when non-significant vaccine perceptions were removed, and “vaccine transmits influenza” became significant when “vaccine contents are dangerous” was removed. In both cases, this indicates that the removed variables were confounders of those that became significant<sup>46</sup>. In France, “trust in manufacturers” was a confounder of education – the latter became significant in the absence of the former – and “trust in physician” was a suppressor of “vaccine access” – the latter became non-significant when the former was excluded<sup>46, 47</sup>. Consequently, all the variables that were significant in M1, one non-significant variable that became significant while performing robustness checks (“vaccine transmits influenza” in the UK) and all the controls were included in the hierarchical models. The magnitude and significance of the relationship between independent and dependent variables varied little between the first models (M1) – where all the variables were entered at the same time – and the last models (M6-M8) – where a reduced number of variables were entered in blocks –, which is a further indication of the robustness of our findings. Detailed robustness checks are not presented here for brevity, but are available from the corresponding author upon request.

All the correlation coefficients between the dependent and the independent variables were higher than 0.1, except for two variables which were tested for the first time in this study: “Bad experience vaccines – child” ( $r = -0,082$ ,  $p < 0.05$  in the UK;  $r = 0.040$ ,  $p > 0.05$  in the US; and  $r = -0.064$ ,  $p > 0.05$  in France) and “Scary health experience – child” ( $r = 0.090$ ,  $p < 0.05$  in the US (detailed results are available from the corresponding author upon request).

Cronbach’s alpha coefficients ranged from acceptable ( $\alpha = 0.65$ ) to excellent ( $\alpha = 0.87$ ) and they were comparable across countries for each evaluated scale, except for “trust in vaccination stakeholders”, which was considerably less reliable in France (Table S5 in Supplementary material). Overall, these results indicate that the scales worked in a similar manner across the three countries. Further psychometric analyses and scale refinement will be performed and reported in a separate article.

Collinearity diagnostics showed that all variables had VIF values below 5, indicating there is no cause for concern<sup>48</sup>. Standardised residuals were also examined to identify outliers. Less than 5% of the cases had standardised residuals above 2 and no more than 1% had absolute values higher than 3, thus there was no need to eliminate or transform cases<sup>49</sup>. Cook’s

1  
2  
3 distance statistics were evaluated to identify cases exerting excessive influence on the model.  
4 No values were higher than 1, which shows that no case had to be excluded on that basis<sup>50</sup>.  
5  
6

## 7 8 **DISCUSSION**

9  
10  
11 This study aimed to identify policy amenable factors associated with recent influenza  
12 vaccination uptake among adults in three high-income countries and to quantify their impact.  
13 Our results support previous findings and add new insights.  
14  
15

16  
17  
18 The final models robustly explained 64-80% of the variance in past vaccination behaviour  
19 and although some predictors were country-specific, we found important commonalities  
20 (Table 5). To the best of our knowledge, ours is the first study to demonstrate that socio-  
21 psychological variables consistently explain most of the variance in past influenza  
22 vaccination behaviour, over and above demographic, socio-economic and health variables  
23 (49% vs. 22% in the US, 42% vs. 38% in the UK and 45% vs. 19% in France). Our findings  
24 also show that the most important policy amenable factors were social influence, particularly  
25 physicians' (US = 14%, UK = 21% and France = 25% of the variance) and perceptions about  
26 influenza (US = 30%, UK = 17% and France = 18% of the variance), communication efforts  
27 should, therefore, focus on these factors. Surprisingly, perceptions about the influenza  
28 vaccine explained a very small proportion of vaccination behaviour across the three  
29 countries. Additionally, our results show that a sizeable proportion of adults under the age of  
30 65 years, both with and without eligible chronic conditions, is vaccinating against influenza  
31 in the US (over a third) and the UK (under a third), whilst only 16% do so in France.  
32  
33  
34  
35  
36  
37  
38  
39  
40  
41

42 Specifically, and in line with previous evidence, we found that age, health status, health  
43 insurance, income, gender, marital status and education were associated with past  
44 vaccination<sup>9,34</sup>. Differences between countries are likely influenced by their healthcare  
45 systems and immunisation policies.  
46  
47  
48  
49

50  
51 For example, having an eligible health condition was more important than age on its own in  
52 the US and the UK, whereas the opposite occurred in France. One plausible reason is that a  
53 controversy about the effectiveness and safety of the A(H1N1)pdm09 vaccine in 2009/2010,  
54 which has had a lasting negative impact on seasonal influenza vaccination rates in France,  
55 may have dissuaded some populations – such as younger people with and without eligible  
56  
57  
58  
59  
60

**Table 5.** Survey items associated with past influenza vaccination

| Item                                                                                                                          | US | UK | France |
|-------------------------------------------------------------------------------------------------------------------------------|----|----|--------|
| What is your date of birth?                                                                                                   |    |    | ✓      |
| Have you ever been diagnosed with any of the following (eligible) conditions?                                                 | ✓  | ✓  |        |
| Do you have a private health insurance?                                                                                       | ✓  | ✓  | ✓      |
| Do you have public health insurance (e.g. Medicare)?                                                                          | ✓  |    |        |
| What is your gender?                                                                                                          |    | ✓  |        |
| Which of the following options best describes your current situation (marital status)?                                        |    | ✓  | ✓      |
| What is your combined annual household income?                                                                                | ✓  |    |        |
| What is the highest level of education you have completed?                                                                    |    |    | ✓      |
| Which of the following statements apply to you?                                                                               |    |    |        |
| I can make time to get the flu vaccine                                                                                        | ✓  |    |        |
| My physician thinks I should get a flu vaccine                                                                                | ✓  | ✓  | ✓      |
| My relatives or close friends think I should get a flu vaccine                                                                |    | ✓  |        |
| With no flu vaccine, I would feel very vulnerable to the flu                                                                  | ✓  | ✓  |        |
| If I got the flu, I would feel sicker than other people my age                                                                |    | ✓  |        |
| Without a flu vaccine, I am sure I would get the flu this winter                                                              | ✓  | ✓  | ✓      |
| I believe that if I got the flu I would have to stay in bed for...                                                            |    | ✓  |        |
| The flu could make me severely ill                                                                                            | ✓  |    |        |
| If I don't get the flu vaccine and I get the flu, passing the flu to other people would worry me because it would be my fault |    | ✓  |        |
| I am confident I can avoid getting the flu, even without the flu vaccine                                                      | ✓  | ✓  | ✓      |
| If I don't get a flu vaccine and end up getting the flu this winter, I would regret not getting the vaccine                   | ✓  | ✓  | ✓      |
| I feel I know enough about the flu vaccine to make an informed decision about whether to get vaccinated or not                | ✓  | ✓  |        |
| If I get a flu vaccine, I will be protected against the flu                                                                   | ✓  |    |        |
| The flu vaccine could give me the flu                                                                                         | ✓  | ✓  |        |
| I am worried that some of the contents of the flu vaccine may be dangerous for me                                             |    |    | ✓      |
| I am confident I can get a flu vaccine if I want one                                                                          |    | ✓  |        |
| Which of the following statements best represents how much you trust your physician?                                          | ✓  |    |        |
| How actively do you participate with your physician in making decisions about health, generally?                              |    | ✓  |        |
| Which of these statements best represents your past experiences as a child?                                                   |    |    |        |
| I had a bad experience with vaccines or injections                                                                            |    | ✓  |        |
| I had a scary health-related experience                                                                                       | ✓  | ✓  | ✓      |

See the full list of included items and response categories in Table S1 in Supplementary material. Highlighted items were significant in two (light grey) or three (dark grey) countries.

1  
2  
3  
4  
5 health conditions who may feel less vulnerable – more than others<sup>34, 51</sup>. This controversy may  
6 also be underpinning the differences in model variance and reliability of the trust scale found  
7 between France and the other two countries, both of which had not experienced important  
8 influenza vaccination scares in recent years, and hence, had maintained fairly constant  
9 vaccination rates for more than a decade at the time of data collection<sup>4, 5, 12</sup>. Private and public  
10 health insurance, and income were associated with past vaccination in the US, a country with  
11 a largely privatised healthcare system. Although the UK and France have healthcare systems  
12 which are free at the point of delivery or affordable for most, the influenza vaccine is only  
13 free of charge for high-risk groups, which may explain the association between health  
14 insurance and past vaccination in both countries – albeit weak in France. Marital status was  
15 also correlated with past vaccination in the UK and France. Higher vaccination rates among  
16 participants living with a partner may be explained by people’s tendency to protect their  
17 significant other or encouragement from partners to get vaccinated, yet more evidence is  
18 needed to substantiate this assertion. Finally, being male and more educated were positively  
19 associated with past vaccination in the UK and France, respectively. Yet, both characteristics  
20 were not robustly correlated with past vaccination across all specifications, and the  
21 association between gender and vaccination in the UK is weak, thus these findings should be  
22 interpreted with caution. Future research testing our findings across adequately powered  
23 samples of high-risk people will certainly improve our understanding of the relative  
24 importance of demographic, socio-economic and health factors in vaccination decisions  
25 among eligible individuals. We hypothesise that socio-psychological factors are likely to be  
26 more pivotal and discriminant within high-risk groups, as characteristics such as age may be  
27 less predictive of vaccination in samples of over 65s and health status may be less important  
28 in samples of younger people with eligible health conditions.

29  
30  
31  
32  
33  
34  
35  
36  
37  
38  
39  
40  
41  
42  
43  
44  
45  
46 Our results also show that practical barriers were not important, except for time in the US.  
47 This finding suggests that a culture of long working hours and short holidays may indeed  
48 have a negative effect on vaccination uptake.  
49  
50

51  
52  
53 Consistent with previous research, we found that physicians’ opinion (and relatives’ opinion  
54 in the UK), perceived vulnerability to and likelihood of influenza (and severity of influenza  
55 measured in number of bed-days in the UK), perceived vaccine effectiveness (only in the  
56 US), the perception that the vaccine transmits influenza (in the US and UK) or that its  
57  
58  
59  
60

1  
2  
3 contents are dangerous (France), and perceived vaccine-related self-efficacy (UK) were  
4 associated with vaccine uptake<sup>9-12, 25</sup>. As previously reported in the literature<sup>11</sup>, we also found  
5 a small negative association between the perceived severity of influenza and past vaccination  
6 in the US, and no association in the UK and France. A possible explanation is that people  
7 who believe that influenza could make them severely ill, may also be concerned about the  
8 vaccine flu-like symptoms, thus omission bias may induce them to refrain from vaccinating<sup>31</sup>,  
9  
10  
11  
12  
13  
14  
15  
16  
17  
18  
19  
20  
21  
22  
23  
24  
25  
26  
27  
28  
29  
30  
31  
32  
33  
34  
35  
36  
37  
38  
39  
40  
41  
42  
43  
44  
45  
46  
47  
48  
49  
50  
51  
52  
53  
54  
55  
56  
57  
58  
59  
60

contents are dangerous (France), and perceived vaccine-related self-efficacy (UK) were associated with vaccine uptake<sup>9-12, 25</sup>. As previously reported in the literature<sup>11</sup>, we also found a small negative association between the perceived severity of influenza and past vaccination in the US, and no association in the UK and France. A possible explanation is that people who believe that influenza could make them severely ill, may also be concerned about the vaccine flu-like symptoms, thus omission bias may induce them to refrain from vaccinating<sup>31</sup>,<sup>52</sup>. Alternatively, the knowledge that influenza could be serious may not necessarily translate into a feeling of personal threat, particularly among younger individuals. A similar result was the lack of or negative of association between perceived susceptibility to influenza and past vaccination in the US and France, and the UK, respectively. These findings indicate that measuring perceived influenza severity as degree of seriousness (“the flu could make me severely ill”) and perceived susceptibility to influenza as individuals’ constitutional vulnerability in relation to that of others (“If I got the flu, I would feel sicker than other people my age”), does not improve our understanding of vaccination behaviour, as previously suggested<sup>11</sup>.

Interestingly, perceived vaccine knowledge (to make informed decisions) was negatively correlated with past vaccination in the US and positively correlated in the UK. Researchers have long advocated for strategies to increase knowledge about vaccines<sup>10</sup>, yet these results suggest that a cognitive approach may not always be effective, particularly when the target population (e.g. US unvaccinated people) perceive themselves as being knowledgeable, and hence are less likely to seek or be receptive to further information.

Factors which are less explored in the literature were also robustly correlated with past vaccination. Perceived control over influenza and regret of catching it (if unvaccinated) were significantly associated with past vaccination behaviour across the three countries. Worry of infecting other people (if unvaccinated) was only linked to past vaccination in the UK, but the direction of the association was unexpected: unvaccinated participants worried more than vaccinated participants of infecting other people if they were to remain unvaccinated. Although this question was hypothetical, it is plausible that unvaccinated participants felt worried about infecting others because of their actual vaccination status, whereas vaccinated participants did not, either because they felt protected by the vaccine or they do not generally worry about infecting others. In any case, this result does not support the notion that altruism motivates people to vaccinate<sup>27</sup>.



1  
2  
3  
4  
5 Our results also show that trust in key vaccination stakeholders does not play a significant  
6 role in influenza vaccination decisions in these countries. In fact, we found that US vaccinees  
7 were less trusting of their physician than those who did not vaccinate. This finding conflicts  
8 with the premise that all vaccination decisions are a combination of individuals' perceptions  
9 of the information they receive and their trust in those who manufacture, legislate and deliver  
10 vaccines<sup>26</sup>.

11  
12  
13  
14  
15  
16 A striking finding from a qualitative study<sup>31</sup> held true when tested quantitatively. UK  
17 participants who had a bad experience with needles in childhood were less likely to vaccinate  
18 later in life, consistent with evidence showing that traumatic experiences can linger through  
19 to adulthood and significantly influence health decisions<sup>53</sup>. This was further supported by the  
20 increased likelihood of vaccinating exhibited by those who reported a scary health-related  
21 experience in childhood across the three countries, although less so in the US, possibly due to  
22 a lasting perception of vulnerability that resulted in enhanced preventive behaviours in  
23 adulthood. To our knowledge, this is the first quantitative study linking adult vaccination  
24 behaviour with childhood experiences. Therefore, further testing these results across different  
25 samples would be desirable to ensure that the link (or lack thereof) between these variables  
26 and influenza vaccination is a true one. Additionally, future research could unpack this  
27 synergistic effect using qualitative approaches.

28  
29  
30  
31  
32  
33  
34  
35  
36  
37  
38 Finally, we found that UK vaccinees were more likely to let their doctors make decisions  
39 about their health. This finding resonates with findings from Opel and colleagues which  
40 showed that parents were more likely to resist advice if the doctor used a participatory (e.g.  
41 "What do you want to do about shots?") rather than a presumptive initiation approach (e.g.  
42 "Well, we have to do some shots")<sup>54</sup>. Researchers could test the replicability of Opel's study  
43 on adult vaccination and further explore the role of health decision-making preferences on  
44 doctor-patient communication about vaccines.

### 51 **Policy implications**

52  
53  
54  
55 This study offers evidence that can inform policy and practice. Socio-psychological factors  
56 associated with influenza vaccination can be used to track vaccination sentiment and forecast  
57 uptake. These factors are currently not consistently monitored and rarely used as a basis for  
58

1  
2  
3 effective service delivery and communication strategies. If we are to improve or at least  
4 sustain current immunisation rates, we must start actively listening to the public by including  
5 these aspects into national immunisation surveys. An important challenge for policymakers is  
6 prioritising what to monitor and to what extent. As a first step, influenza vaccination  
7 surveillance systems should include the explanatory variables reported here, particularly  
8 those accounting for a significant proportion of the variance in vaccination behaviour (i.e.  
9 social influence and influenza perceptions), and make additions or adjustments over time.  
10  
11  
12  
13  
14  
15

16 More importantly, our findings suggest that socio-psychological factors could provide a  
17 valuable opportunity to develop and evaluate targeted interventions to improve vaccination  
18 coverage. For instance, the influence of physicians' opinions on vaccination, over and above  
19 people's trust in immunisation stakeholders (including physicians themselves), indicates that  
20 improving communications at the practice level should be prioritised. One possible  
21 intervention is to reach under-vaccinated groups (e.g. younger eligible individuals) via  
22 consultations and vaccination reminders, a strategy that has been successful in older  
23 populations<sup>55</sup>. A complementary initiative is to link influenza vaccination rates to pay-for-  
24 performance systems, such as the UK Quality and Outcomes Framework (QoF) which  
25 rewards general practitioners for vaccinating some at-risk groups. Yet, further incentivising  
26 primary care practices to employ more effective approaches to reach out to eligible  
27 unvaccinated patients, may require a stratified strategy that offers larger rewards for  
28 vaccinating sub-groups with low vaccination rates and additional incentives for exceeding  
29 vaccination targets<sup>56</sup>. However, we acknowledge that the implementation of more complex  
30 incentive systems would require additional resources. In the US, programmes to introduce the  
31 influenza vaccine in the work place may encourage those with limited time to protect  
32 themselves.  
33  
34  
35  
36  
37  
38  
39  
40  
41  
42  
43  
44  
45

46 Efforts could also focus on addressing the gap between perceived and real risks of influenza.  
47 This could be achieved by moving away from generic messages about the threat of influenza  
48 (e.g. "influenza is serious") toward tailored messages which take into consideration the needs  
49 and characteristics of different at-risk populations. For instance, influenza-related  
50 complications in young diabetics may differ from those experienced by elderly people.  
51 Specific messages may, therefore, allow individuals and their families to better identify risks  
52 relevant to their condition and, in turn, compel them to vaccinate.  
53  
54  
55  
56  
57  
58  
59  
60

1  
2  
3 Similarly, effective communications as part of the consultation aimed at assuaging concerns  
4 around vaccines could take into account decision-making preferences and individual past  
5 experiences, particularly in the UK. For instance, communication efforts are likely to be  
6 better spent on those who prefer to make decisions about their health independently than those  
7 who are more prone to delegate health decisions to their physician. Given the lasting effect of  
8 some traumatic childhood experiences, interventions and new products aimed at making all  
9 childhood encounters with injections as easy as possible may be a good investment in the  
10 success of vaccination programs in the future.

11  
12  
13  
14  
15  
16  
17  
18 However, in a context of constrained resources, physicians and nursing staff have limited  
19 time and resources to improve vaccination services and communications. Hence, increased  
20 investment in the provision of training, adequate communication materials and decision aids  
21 to enhance patient-doctor communication is urgently needed and much deserved.

22  
23  
24  
25  
26 Messages delivered in primary care settings could also be complemented with evidence-  
27 based mass-communications. For example, a national campaign could combine messages  
28 about the risks of influenza (e.g. likelihood of catching it and feelings of vulnerability and  
29 regret for not vaccinating) with messages about the limited protectiveness of avoidance  
30 strategies (e.g. taking vitamins or evading crowds), and provide – rather than avoid – easy-to-  
31 understand and accurate information about vaccine safety (e.g. communicating more  
32 effectively the difference between vaccine-induced symptoms and actual influenza  
33 symptoms) and effectiveness, particularly in the US. When possible, mass communications  
34 should also be tailored to specific at-risk populations.

35  
36  
37  
38  
39  
40  
41  
42  
43 Finally, given that the influenza vaccine is more effective in healthy working adults<sup>57</sup> –  
44 reducing the number of influenza-like episodes among this population, but also providing  
45 indirect protection to at-risk groups –, knowing what motivates them to vaccinate can be  
46 valuable to policy-makers seeking to reduce the societal cost of influenza.

## 47 48 49 50 51 **Limitations**

52  
53  
54  
55 This study has several limitations, some of which may affect the generalisability of our  
56 findings. Although the use of non-probability online panels has become increasingly  
57 common<sup>58,59</sup>, response rates are generally low<sup>37,60</sup>. This is largely because online panel

1  
2  
3 members become desensitised to survey e-mail invitations from the online panel provider<sup>60</sup>,  
4  
5 <sup>61</sup>. However, an emerging body of evidence shows that higher response rates may not be  
6  
7 associated with more accuracy, in fact, some studies have found that high response rates can  
8  
9 yield less accurate results<sup>62</sup>. This suggests that the low response rates we achieved may not be  
10  
11 as important a source of bias as using a sample drawn from a non-probability online panel.  
12  
13 This is because the relationship between the sample and the non-probability online panel  
14  
15 population is often unknown, so it is not possible to estimate how representative the sample is  
16  
17 of the population as a whole. Therefore, our research may have suffered from respondent-  
18  
19 related biases; for example, people for whom vaccination issues are particularly salient may  
20  
21 have been more prone to participate<sup>61</sup>. Consequently, responses may have been more  
22  
23 polarised, both in favour and against of vaccination. Future studies testing our findings using  
24  
25 different sampling strategies, such as the use of probability online panels or random digit  
26  
27 dialing, is warranted. A related limitation is that our US sample was more educated than the  
28  
29 population, which may have affected the generalisability of our findings, although there is no  
30  
31 consensus regarding the link between education and influenza vaccination in the US<sup>9-10, 12</sup>.  
32  
33 Similarly, in France, participants were less likely to disclose their household income and over  
34  
35 half reported it to be equal or below the band that was closest to the median income of the  
36  
37 population, which could also have biased or results. Further, since we sought to attain  
38  
39 samples that were representative of the adult population, they may not have been adequately  
40  
41 powered to detect sub-group differences (e.g. whites vs. non-whites).

42  
43 Another possible drawback is that lengthy instruments may fatigue participants and affect the  
44  
45 quality of the data. Although pilot results indicated that participants did not feel the survey  
46  
47 was long or difficult to complete, there is a chance that those who did not finish the survey  
48  
49 may have found it too lengthy. A related limitation is the dichotomisation of four continuous  
50  
51 variables, which could have resulted in loss of information. However, on balance, this was  
52  
53 deemed necessary to aid the analysis of survey-items with numerous “I don’t know/not  
54  
55 applicable” responses, which are not the same as missing responses. Strategies used to deal  
56  
57 with missing responses, such as imputation or case exclusion, would have been inappropriate  
58  
59 or would have significantly reduced the size of our samples and affected their composition.  
60

61  
62 An additional limitation is the use of a subjective outcome measure. Although data from  
63  
64 medical records may be preferable, previous research comparing the accuracy of the latter to  
65  
66 self-reported influenza vaccination has shown these can coincide in up to 90% of the cases<sup>63</sup>.

1  
2  
3 Further, since some people vaccinate at work or alternative facilities such as pharmacies, it  
4 remains unclear whether medical records are more accurate than self-reports.  
5  
6

7  
8 Lastly, although we employed a battery of measures designed to capture people's actual  
9 perceptions about influenza and the influenza vaccine, using a prospective design and a  
10 representative sample of vaccine-naïve participants would have been preferable to avoid post-  
11 decisional rationalisations. However, this research design requires substantial financial  
12 resources and time which were not available to us, and hence, a retrospective design was  
13 chosen instead. Consequently, and consistent with other retrospective cross-sectional studies,  
14 causation cannot be inferred, thus some of the assessed perceptions may have been generated  
15 or reinforced by prior vaccination. Moreover, this study's design precludes any attempt to  
16 predict future behaviours. Further research testing whether the identified explanatory  
17 variables prospectively predict actual vaccination uptake among first-time vaccinees is  
18 merited.  
19  
20  
21  
22  
23  
24  
25  
26

## 27 28 **CONCLUSIONS**

29  
30  
31 This study identifies policy amenable factors associated with past influenza vaccination and  
32 presents a set of robust explanatory variables that aims to attain a comprehensive and more  
33 accurate understanding of the constellation of factors underpinning vaccination behaviour.  
34 Our findings can prove useful for countries looking to improve vaccination rates by  
35 developing more opportune and effective communication strategies and implementing  
36 evidence-based interventions. Our results highlight the importance of routinely monitoring  
37 vaccination sentiment and using these data to inform immunisation policy.  
38  
39  
40  
41  
42  
43  
44  
45  
46  
47  
48  
49  
50  
51  
52  
53  
54  
55  
56  
57  
58  
59  
60

## COMPETING INTERESTS AND FUNDING

This work was supported by Sanofi Pasteur through a research grant (P40006\_WSSS) and the National Institute for Health Research Imperial Patient Safety Translational Research Centre (PSTRC) (RDPSC 79560), UK. Sevdalis' research is funded by the National Institute for Health Research (NIHR) via the 'Collaboration for Leadership in Applied Health Research and Care South London' at King's College Hospital NHS Foundation Trust, London, UK. Sevdalis also delivers behavioral and safety interventions and training to hospitals internationally on a consultancy basis through London Safety and Training Solutions Ltd. Wheelock and Sevdalis currently have a consultancy agreement as paid scientific advisors in the design of a shingles vaccine survey by Sanofi MSD. Thomson is employed by Sanofi Pasteur. Miraldo and Vincent have nothing to disclose. The views expressed are those of the authors and not necessarily those of the National Health Service, the NIHR, the Department of Health or Sanofi Pasteur.

## ACKNOWLEDGEMENTS

The authors would like to thank the funders of this study and all those who agreed to take part in our research. We are also grateful to Bruno Rigole (Sanofi Pasteur), Rebecca da Cunha, Brian Larkin, Sofia Lombera and Natasha Phillips (Double Helix), and Nicole Huyghe and Kerry O'Neill (solutions-2) for their valuable advice and management support throughout this study.

## AUTHOR CONTRIBUTIONS

AW, MM, AT, CV and NS contributed to the design of the study, the interpretation of the results and write-up of the manuscript. AW led the analysis and drafting of the manuscript. MM provided statistical advice.

## DATA SHARING STATEMENT

No additional data are available.

## REFERENCES

1. GBD 2013 Mortality and Causes of Death Collaborators. Global, regional, and national age–sex specific all-cause and cause-specific mortality for 240 causes of death, 1990–2013: a systematic analysis for the Global Burden of Disease Study 2013. *Lancet* 2013;385(9963):117-171.
2. CDC. Estimates of deaths associated with seasonal influenza - United States, 1976-2007. *MMWR* 2010;59(33):1057.
3. ECDC. Factsheet for the general public.  
[http://ecdc.europa.eu/en/healthtopics/seasonal\\_influenza/basic\\_facts/Pages/factsheet\\_general\\_public.aspx](http://ecdc.europa.eu/en/healthtopics/seasonal_influenza/basic_facts/Pages/factsheet_general_public.aspx). Accessed March 30, 2015.
4. CDC. Seasonal influenza vaccination trends.  
<http://www.cdc.gov/flu/fluview/trends.htm>. Accessed February 1, 2016.
5. PHE. Influenza immunisation programme for England: GP patient groups data collection survey season 2013 to 2014.  
[https://www.gov.uk/government/uploads/system/uploads/attachment\\_data/file/319694/29024\\_94\\_FluVaccineUptake\\_GPPatients2013-14\\_acc.pdf](https://www.gov.uk/government/uploads/system/uploads/attachment_data/file/319694/29024_94_FluVaccineUptake_GPPatients2013-14_acc.pdf). Accessed December 1, 2014.
6. 56th World Health Assembly. *Prevention and Control of Influenza Pandemics and Annual Epidemics*. Geneva, Switzerland; 2003.
7. ONS. Excess Winter Mortality in England and Wales, 2014/15 (Provisional) and 2013/14 (Final).  
<http://webarchive.nationalarchives.gov.uk/20160105160709/http://www.ons.gov.uk/ons/rel/s-ubnational-health2/excess-winter-mortality-in-england-and-wales/2014-15--provisional--and-2013-14--final-/index.html>. Accessed May 30, 2016.
8. PHE. Influenza immunisation programme for England: GP patient groups data collection survey season 2015 to 2016.  
[https://www.gov.uk/government/uploads/system/uploads/attachment\\_data/file/526033/Seasonal\\_flu\\_GP\\_patient\\_groups\\_annual\\_report\\_2015\\_2016.pdf](https://www.gov.uk/government/uploads/system/uploads/attachment_data/file/526033/Seasonal_flu_GP_patient_groups_annual_report_2015_2016.pdf). Accessed May 30, 2016.
9. Chapman GB, Coups EJ. Predictors of influenza vaccine acceptance among healthy adults. *Prev Med* 1999;29(4):249-262.
10. Kohlhammer Y, Schnoor M, Schwartz M, Raspe H, Schäfer T. Determinants of influenza and pneumococcal vaccination in elderly people: a systematic review. *Public Health* 2007;121(10):742-751.



- 1  
2  
3 11. Brewer NT, Chapman GB, Gibbons FX, Gerrard M, McCaul KD, Weinstein ND.  
4 Meta-analysis of the relationship between risk perception and health behavior: the example of  
5 vaccination. *Health Psychol* 2007;26(2):136.  
6  
7
- 8 12. Wheelock A, Thomson A, Sevdalis N. Social and psychological factors underlying  
9 adult vaccination behavior: lessons from seasonal influenza vaccination in the US and the  
10 UK. *Expert Rev Vaccines* 2013:1-9.  
11
- 12 13. CDC. Influenza vaccination and self-reported reasons for not receiving influenza  
13 vaccination among Medicare beneficiaries aged > or =65 years--United States, 1991-2002.  
14 *MMWR* 2004;53(43):1012-5.  
15  
16
- 17 14. Tversky A, Kahneman D. Availability: A heuristic for judging frequency and  
18 probability. *Cognitive Psychol* 1973;5(2):207-232.  
19
- 20 15. Weinstein ND. Misleading tests of health behavior theories. *Ann Behav Med*  
21 2007;33(1):1-10.  
22
- 23 16. NVAC. NVAC Vaccine Hesitancy Working Group Charge.  
24 <http://www.hhs.gov/nvpo/nvac/subgroups/nvac-vaccine-hesitancy-wgcharge.html>. Accessed  
25 February 28, 2014.  
26  
27
- 28 17. Larson HJ, Jarrett C, Schulz WS, Chaudhuri M, Zhou Y, Dube E, et al. Measuring  
29 vaccine hesitancy: The development of a survey tool. *Vaccine* (0).  
30  
31
- 32 18. Weinstein ND, Kwitel A, McCaul KD, Magnan RE, Gerrard M, Gibbons FX. Risk  
33 perceptions: Assessment and relationship to influenza vaccination. *Health Psychol*  
34 2007;26(2):146-151.  
35  
36
- 37 19. Liao Q, Wong WS and Fielding R. Comparison of Different Risk Perception  
38 Measures in Predicting Seasonal Influenza Vaccination among Healthy Chinese Adults in  
39 Hong Kong: A Prospective Longitudinal Study. *PloS one* 2013;8(7):e68019.  
40  
41
- 42 20. Nexøe J, Kragstrup J and Søgaard J. Decision on influenza vaccination among the  
43 elderly: a questionnaire study based on the Health Belief Model and the Multidimensional  
44 Locus of Control Theory. *Scand J Prim Health* 1999;17(2):105-110.  
45  
46
- 47 21. Callegaro M, Baker RP, Bethlehem J, Göritz AS, Krosnick JA, Lavrakas PJ. *Online*  
48 *Panel Research: A Data Quality Perspective*. John Wiley & Sons; 2014.  
49  
50
- 51 22. Rosenstock IM. Why people use health services. *Milbank Q* 1966;94-127.  
52
- 53 23. Toepoel V, Das M and Van Soest A. Effects of Design in Web Surveys: Comparing  
54 Trained and Fresh Respondents. *Public Opin Quart* 2008;72(5): 985-1007.  
55
- 56 24. Rogers RW. A protection motivation theory of fear appeals and attitude change.  
57 *Journal Psychol* 1975;91(1):93-114.  
58  
59  
60



- 1  
2  
3 25. Liao Q, Cowling BJ, Lam WWT, Fielding R. Factors affecting intention to receive  
4 and self-reported receipt of 2009 pandemic (H1N1) vaccine in Hong Kong: a longitudinal  
5 study. *PLoS one* 2011;6(3):e17713.  
6  
7  
8 26. Larson HJ, Cooper LZ, Eskola J, Katz SL, Ratzan S. Addressing the vaccine  
9 confidence gap. *Lancet* 2011;378(9790):526-535.  
10  
11 27. Wallston KA, Wallston BS, Smith S and Dobbins CJ. Perceived control and health.  
12 *Curr Psychol* 1987;6(1):5-25.  
13  
14 28. Shim E, Chapman GB, Townsend JP and Galvani AP. The influence of altruism on  
15 influenza vaccination decisions. *J R Soc Interface* 2012;9(74): 2234-2243.  
16  
17 29. Lehmann BA, Robert ACR and Gerjo K. A qualitative study of the coverage of  
18 influenza vaccination on Dutch news sites and social media websites. *BMC public health*  
19 2013;121(10):742-751  
20  
21 30. Chapman GB and Coups EJ. Emotions and preventive health behavior: Worry, regret,  
22 and influenza vaccination. *Health Psychol* 2006;25(1):82-90.  
23  
24 31. Wheelock A, Parand A, Rigole B, Thomson A, Miraldo M, Vincent C, et al. Socio-  
25 Psychological Factors Driving Adult Vaccination: A Qualitative Study. *PLoS one* 2014;9(12).  
26  
27 32. Robinson A, Thomson R. Variability in patient preferences for participating in  
28 medical decision making: implication for the use of decision support tools. *Qual Health Care*  
29 2001;10(suppl 1):i34-i38.  
30  
31 33. Safran DG, Kosinski M, Tarlov AR, Rogers WH, Taira DA, Lieberman N and Ware  
32 JE. The Primary Care Assessment Survey: Tests of Data Quality and Measurement  
33 Performance. *Med Care* 1998;36(5):728-739.  
34  
35 34. Caille-Brillet A, Raude J, Lapidus N, De Lamballerie X, Carrat F, Setbon M. Trends  
36 in influenza vaccination behaviours—results from the CoPanFlu cohort, France, 2006 to 2011.  
37 *High Educ* 2013;419(28.9):26.6-31.2.  
38  
39 35. Saris WE and Gallhofer IN. Estimation of the effects of measurement characteristics  
40 on the quality of survey questions. In: Saris WE and Gallhofer IN, eds. *Design, Evaluation,*  
41 *and Analysis of Questionnaires for Survey Research*. Hoboken, NJ: John Wiley & Sons,  
42 2007.  
43  
44 36. Hosmer Jr DW, Lemeshow S. *Applied logistic regression*. John Wiley & Sons; 2004.  
45  
46 37. Baker R, Blumberg SJ, Brick JM, Couper MP, Courtright M, Dennis JM, et al.  
47 Research synthesis AAPOR report on online panels. *Public Opin Quart* 2010;74(4):711-781.  
48  
49 38. Sheldon H, Graham C, Potheary N, Rasul F. Increasing response rates amongst black  
50 and minority ethnic and seldom heard groups. *Pickier Institute Europe*, 2007.  
51  
52  
53  
54  
55  
56  
57  
58  
59  
60

- 1  
2  
3 39. Riphagen Dalhuisen J. Predictors of seasonal influenza vaccination among healthcare  
4 workers in hospitals: a descriptive meta-analysis. *Occup Environ Med* 2012;69(4):230.  
5  
6 40. US Census Bureau. *Statistical Abstract of the United States: 2012*. 131st ed.  
7 Washington, DC, 2011. <http://www.census.gov/compendia/statab/>.  
8  
9 41. Office for National Statistics. Annual Mid-year Population Estimates, 2013. Available  
10 from: [http://www.ons.gov.uk/ons/dcp171778\\_367167.pdf](http://www.ons.gov.uk/ons/dcp171778_367167.pdf). Accessed December 1, 2014.  
11  
12 42. Office for National Statistics. 2011 Census: Aggregate data (England and Wales)  
13 [computer file]. UK Data Service Census Support. <http://infuse.mimas.ac.uk>. Accessed  
14 December 1, 2014.  
15  
16 43. Department for Work and Pensions. Households Below Average Income - An  
17 analysis of the income distribution 1994/95 – 2012/13.  
18 [https://www.gov.uk/government/uploads/system/uploads/attachment\\_data/file/325416/house](https://www.gov.uk/government/uploads/system/uploads/attachment_data/file/325416/households-below-average-income-1994-1995-2012-2013.pdf)  
19 holds-below-average-income-1994-1995-2012-2013.pdf. Accessed April 20, 2015.  
20  
21 44. National Institute of Statistics and Economic Studies. Population census 2011.  
22 <http://www.insee.fr/>. Published 2012. Accessed April 15, 2015.  
23  
24 45. ECDC. Seasonal influenza vaccination and antiviral use in Europe – Overview of  
25 vaccination recommendations and coverage rates in the EU Member States for the 2013–14  
26 and 2014–15 influenza seasons. Published 2016. Accessed August 22, 2016.  
27  
28 46. Friedman L & Wall M. Graphical views of suppression and multicollinearity in  
29 multiple linear regression. *Am Stat* 2005;59(2), 127-136.  
30  
31 47. MacKinnon DP, Krull JL & Lockwood CM. Equivalence of the mediation,  
32 confounding and suppression effect. *Prev Sci*, 2000;1(4):173-181.  
33  
34 48. Bowerman BL and O'Connell RT. *Linear statistical models: An applied approach*.  
35 Belmont, CA: Duxbury, 1990.  
36  
37 49. Field A. *Discovering statistics using IBM SPSS statistics*. 4th ed. London: Sage, 2013.  
38  
39 50. Cook RD and Weisberg S. *Residuals and influence in regression*. New York:  
40 Chapman & Hall, 1982.  
41  
42 51. Peretti-Watel P, Raude J, Sagaon-Teyssier L, Constant A, Verger P, Beck F. Attitudes  
43 toward vaccination and the H1N1 vaccine: Poor people's unfounded fears or legitimate  
44 concerns of the elite? *Soc Sci Med* 2014;109:10-18.  
45  
46 52. Ritov I and Baron J. Reluctance to vaccinate: Omission bias and ambiguity. *J Behav*  
47 *Decis Making* 1990;3(4):263-277.  
48  
49  
50  
51  
52  
53  
54  
55  
56  
57  
58  
59  
60

- 1  
2  
3 53. Taddio A, Katz J, Ilersich AL, Koren G. Effect of neonatal circumcision on pain  
4 response during subsequent routine vaccination. *Lancet* 1997;349(9052):599-603.  
5  
6 54. Opel DJ, Heritage J, Taylor JA, Mangione-Smith R, Salas HS, DeVere V, Zhou C and  
7 Robinson JD. The architecture of provider-parent vaccine discussions at health supervision  
8 visits. *Pediatrics* 2013;132(6):1037-1046.  
9  
10 55. Thomas RE, Russell M, Lorenzetti D. Interventions to increase influenza vaccination  
11 rates of those 60 years and older in the community. *Cochrane Database Syst Rev*  
12 2010;8(9):CD005188.  
13  
14 56. Dexter LJ, Teare MD, Dexter M, Siriwardena AN, Read RC. Strategies to increase  
15 influenza vaccination rates: outcomes of a nationwide cross-sectional survey of UK general  
16 practice. *BMJ open* 2012;2(3):e000851.  
17  
18 57. Legrand J, Vergu E, Flahault A. Real-time monitoring of the influenza vaccine field  
19 effectiveness. *Vaccine* 2006;24(44-46):6605-6611.  
20  
21 58. Couper MP. Web surveys: A review of issues and approaches. *Public Opin Q*  
22 2000;64:464-494.  
23  
24 59. Pedersen MJ and Nielsen CV. Improving Survey Response Rates in Online Panels:  
25 Effects of Low-Cost Incentives and Cost-Free Text Appeal Interventions. *Soc Sci Comput*  
26 *Rev* 2014;34:229-243.  
27  
28 60. Tourangeau R, Groves RM, Kennedy C and Yan T. The presentation of a web survey,  
29 nonresponse and measurement error among members of web panel. *J Off Stat* 2009;25:299-  
30 321.  
31  
32 61. Keusch F. The role of topic interest and topic salience in online panel web surveys.  
33 *Int J Market Res* 2013;55:58-80.  
34  
35 62. Yeager DS, Krosnick JA, Chang L, Javitz HS, Levendusky MS, Simpser A, et al.  
36 Comparing the accuracy of RDD telephone surveys and internet surveys conducted with  
37 probability and non-probability samples. *Public Opin Quart* 2011;75(4):709-74.  
38  
39 63. Nichol K, Korn J, Baum P. Estimation of outpatient risk characteristics and influenza  
40 vaccination status: validation of a self-administered questionnaire. *Am J Prev Med*  
41 1990;7(4):199-203.  
42  
43  
44  
45  
46  
47  
48  
49  
50  
51  
52  
53  
54  
55  
56  
57  
58  
59  
60

## SUPPLEMENTARY MATERIAL

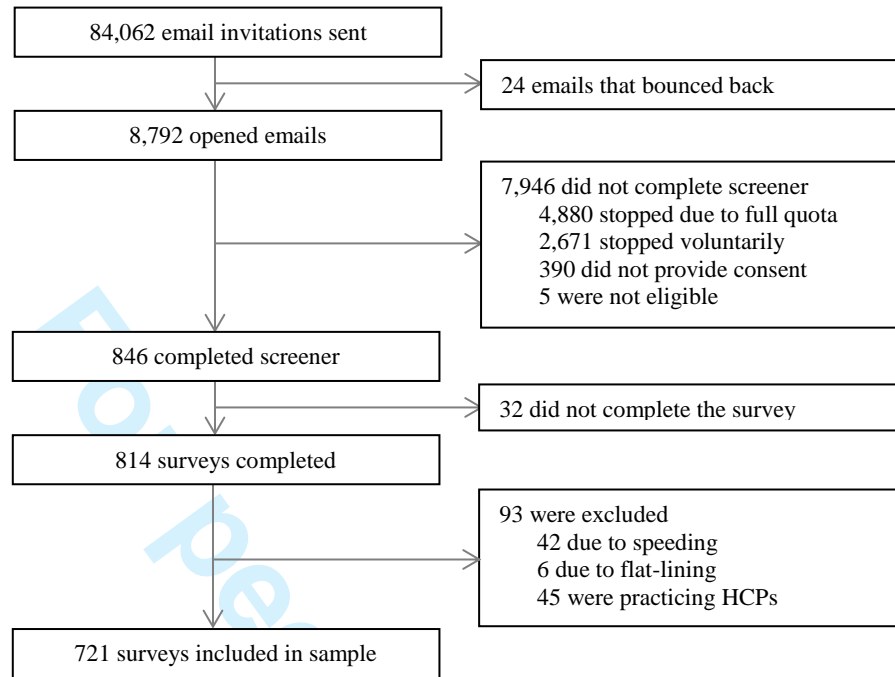

**Figure S1a.** Online sample recruitment flow diagram – US

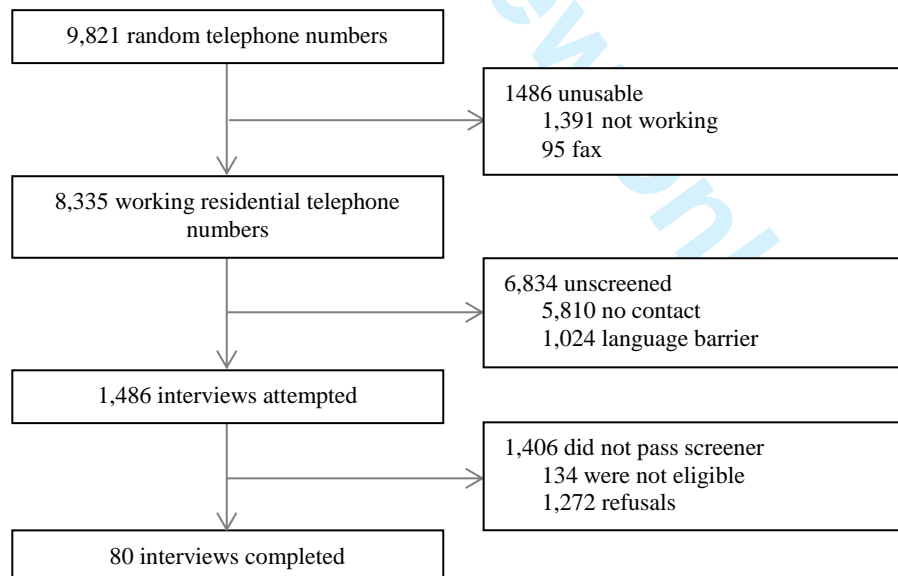

**Figure S1b.** Telephone sample recruitment flow diagram – US

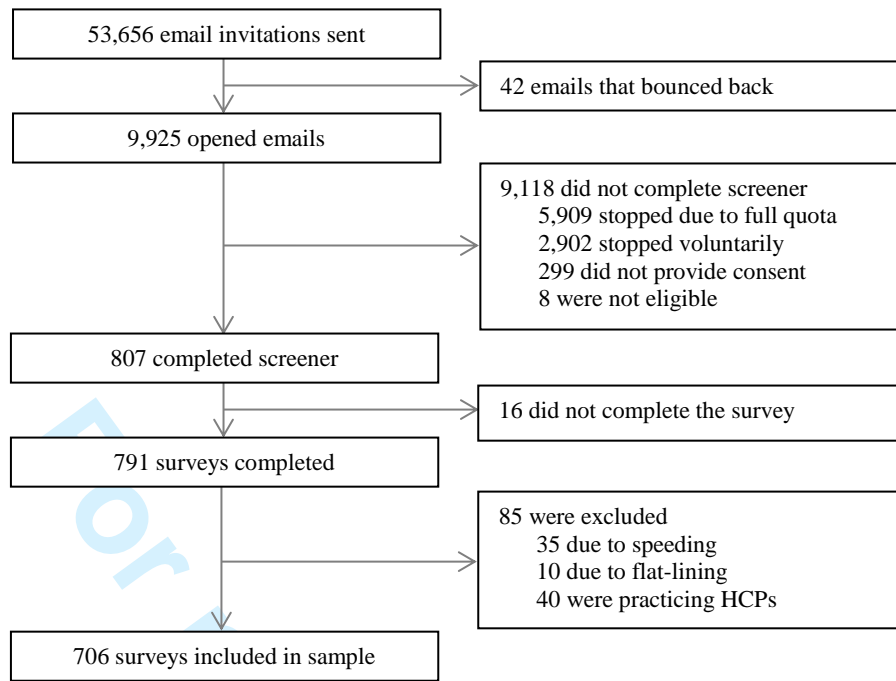

**Figure S2a.** Online sample recruitment flow diagram – UK

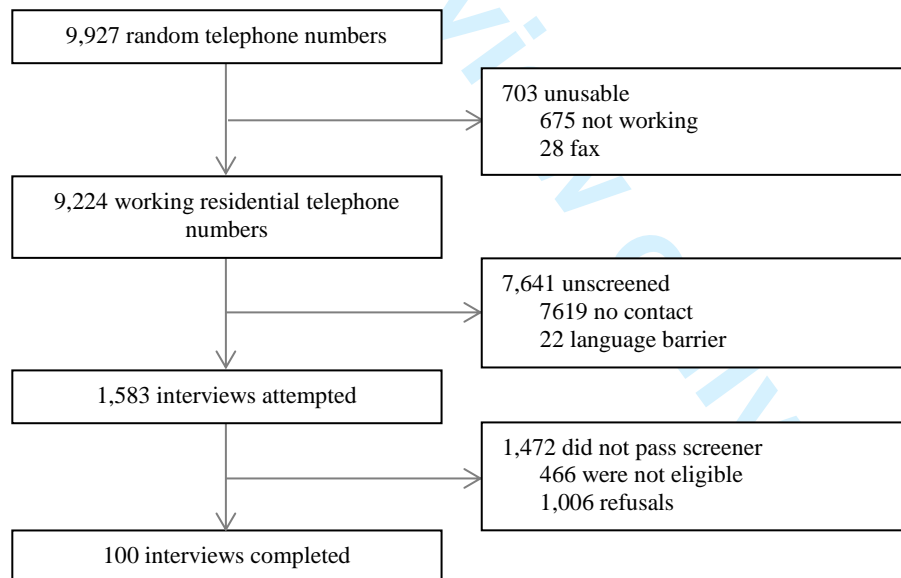

**Figure S2b.** Telephone sample recruitment flow diagram – UK

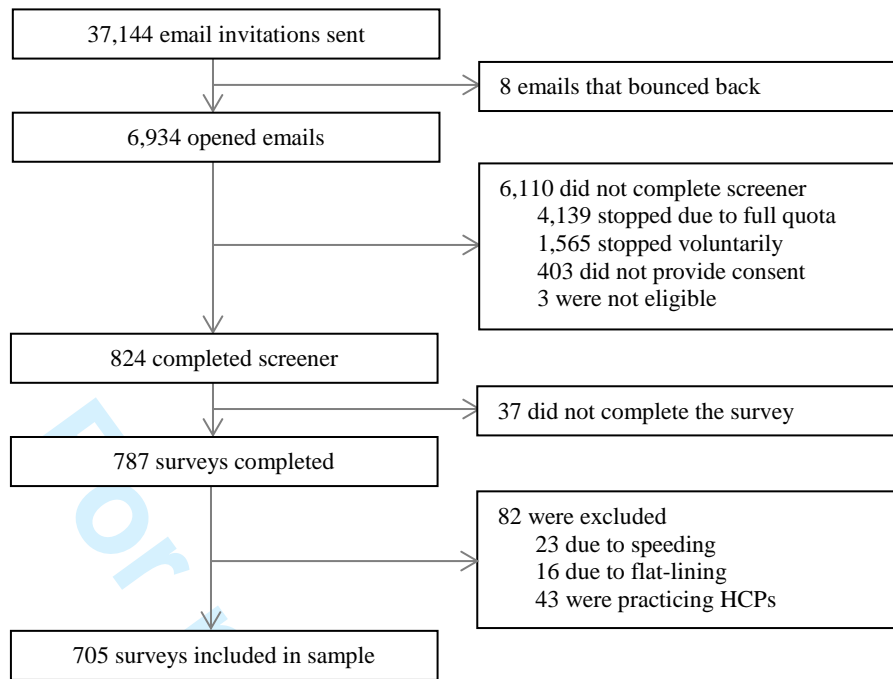

27  
28  
29  
30  
31  
32  
33

**Figure S3a.** Online sample recruitment flow diagram – France

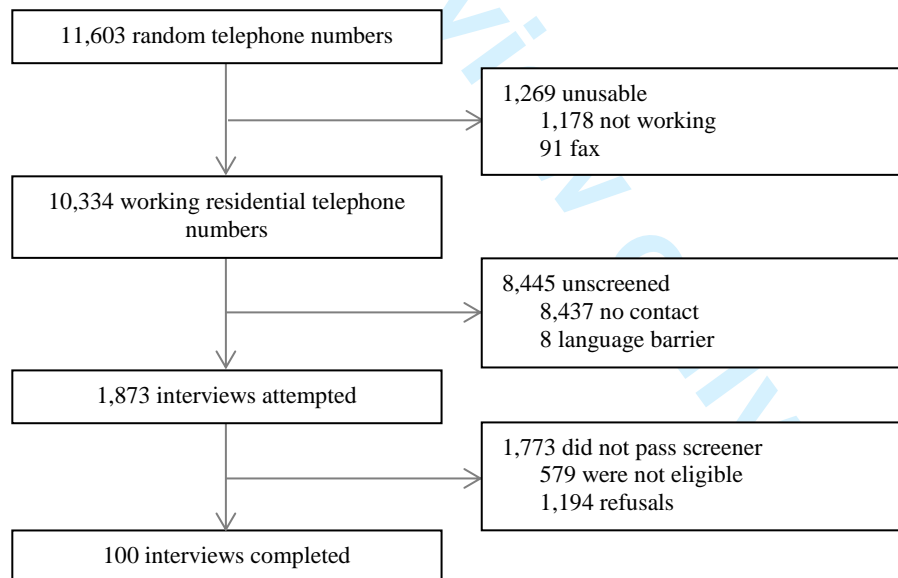

56  
57  
58  
59  
60

**Figure S3b.** Telephone sample recruitment flow diagram – France

**Box S1.** Key features of non-probability online panels

A non-probability online panel is a panel of participants (usually large – over 1 million people), which is not representative of the whole population of a country. This is because such panels include those who can and are interested in participating, usually for a fee, and do not normally include people who cannot or are less able to use the internet. Therefore, employing a combined recruitment strategy to access the latter segments, such as telephone interviews, is advisable.

**Box S2.** Description of the logistic regression procedure

Firstly, we generated a model per country entering all the variables at the same time (M1). Secondly, we manually removed the variables which were not significant in M1, but retained as controls all demographic, socio-economic and health variables, as follows. We generated a different model per country which included all the significant variables and all the non-significant variables except for one. This procedure was repeated for each one of the non-significant variables – resulting in 12 different specifications in the US, 11 in the UK and 21 in France – and checked the robustness of the results by assessing changes in the significance of the relationship between the independent and dependent variables. Thirdly, variables that were significant across most specifications and controls were entered in “blocks” using a hierarchical approach (M2-M8), to understand their role in explaining vaccination behaviour. The order in which the blocks of variables were entered was based upon previous evidence and our aim of assessing the importance of policy amenable factors in explaining influenza vaccination. This is because when predictors are correlated, as it is often the case, the order of variable entry can have an effect on the estimated model parameters. Thus, blocks of variables were entered in a sequence according to their conceptual importance: variables which had been frequently associated with vaccination uptake in the past were entered first and those which had been explored less were entered last. We prioritised demographic, socio-economic and health variables, and practical vaccination barriers, to allow these variables to account for the variance in vaccination behaviour before socio-psychological variables were incorporated. Seven blocks of explanatory variables were entered in the following order: 1) demographic, socio-economic and health-related variables; 2) practical barriers to influenza vaccination; 3) social influence; 4) influenza perceptions; 5) influenza vaccine perceptions; 6) trust in vaccination stakeholders; and 7) shared decision-making and childhood experiences.



**Table S1.** Included survey items

| Item                                                                                                                              | Response categories                                                                                                                                                                                                                                                                                                                                                                                                                                                                                                                                                                                                                                                                                                                     |
|-----------------------------------------------------------------------------------------------------------------------------------|-----------------------------------------------------------------------------------------------------------------------------------------------------------------------------------------------------------------------------------------------------------------------------------------------------------------------------------------------------------------------------------------------------------------------------------------------------------------------------------------------------------------------------------------------------------------------------------------------------------------------------------------------------------------------------------------------------------------------------------------|
| 1) Have you received a flu vaccine in the past 6 months (this autumn / winter)?                                                   | Yes / no                                                                                                                                                                                                                                                                                                                                                                                                                                                                                                                                                                                                                                                                                                                                |
| 2) What is your date of birth?                                                                                                    | Date                                                                                                                                                                                                                                                                                                                                                                                                                                                                                                                                                                                                                                                                                                                                    |
| 3) What is your gender?                                                                                                           | Female / male                                                                                                                                                                                                                                                                                                                                                                                                                                                                                                                                                                                                                                                                                                                           |
| 4) Which of the following ethnic groups do you feel you belong to?                                                                | List of country-specific groups                                                                                                                                                                                                                                                                                                                                                                                                                                                                                                                                                                                                                                                                                                         |
| 5) What is your combined annual household income?                                                                                 | List of country-specific income brackets                                                                                                                                                                                                                                                                                                                                                                                                                                                                                                                                                                                                                                                                                                |
| 6) Which of the following best describes your current situation?                                                                  | Married or living with a partner / single / widowed / divorced or separated /other / prefer not to say                                                                                                                                                                                                                                                                                                                                                                                                                                                                                                                                                                                                                                  |
| 7) Have you ever been diagnosed with any of the following conditions?                                                             | List of eligible conditions                                                                                                                                                                                                                                                                                                                                                                                                                                                                                                                                                                                                                                                                                                             |
| 8) What is the highest level of education you have completed?                                                                     | List of country-specific education levels                                                                                                                                                                                                                                                                                                                                                                                                                                                                                                                                                                                                                                                                                               |
| 9) Do you have a private health insurance                                                                                         | Yes / no                                                                                                                                                                                                                                                                                                                                                                                                                                                                                                                                                                                                                                                                                                                                |
| 10) Do you have public health insurance (e.g. Medicare) – US only                                                                 | Yes / no                                                                                                                                                                                                                                                                                                                                                                                                                                                                                                                                                                                                                                                                                                                                |
| 11) How actively do you participate with your physician in making decisions about health, generally? (Single select)              | 1. My physician always makes decisions for me<br>2. I like to know the options available but still let my physician decide for me<br>3. My physician and I make decisions together<br>4. I make decisions for myself, after considering the advice of my physician<br>5. I always make my own decisions, independently of the advice of my physician                                                                                                                                                                                                                                                                                                                                                                                    |
| 12) Which of the following statements best represents how much you trust your physician? (Multiple select)                        | <input type="radio"/> I can tell my physician anything, even things that I might not tell anyone else<br><input type="radio"/> My physician sometimes pretends to know things when he / she is not really sure<br><input type="radio"/> I completely trust my physician's judgment about my medical care<br><input type="radio"/> My physician cares more about cutting down costs than about doing what is needed for my health<br><input type="radio"/> My physician would always tell me the truth about my health, even if there was bad news<br><input type="radio"/> My physician cares as much as I do about my health<br><input type="radio"/> If a mistake was made in my treatment, my physician would try to hide it from me |
| 13) I generally trust vaccine manufacturers / pharmaceutical companies                                                            | Scale 0-10: strongly disagree / strongly agree                                                                                                                                                                                                                                                                                                                                                                                                                                                                                                                                                                                                                                                                                          |
| 14) I generally trust the National Health Service (or equivalent)                                                                 | Scale 0-10: strongly disagree / strongly agree                                                                                                                                                                                                                                                                                                                                                                                                                                                                                                                                                                                                                                                                                          |
| 15) Which of these statements best represents your past experiences as a child? (Multiple select)                                 | <input type="radio"/> I had a bad experience with vaccines or injections<br><input type="radio"/> I had a scary health-related experience                                                                                                                                                                                                                                                                                                                                                                                                                                                                                                                                                                                               |
| 16) I am scared of getting the flu                                                                                                | Scale 0-10: strongly disagree / strongly agree                                                                                                                                                                                                                                                                                                                                                                                                                                                                                                                                                                                                                                                                                          |
| 17) I believe that if I got the flu I would have to stay in bed for... (Single select)                                            | 1.0 days<br>2.1-2 days<br>3.3-4 days<br>4.5-6 days<br>5.1 week – 2 weeks<br>6. More than 2 weeks                                                                                                                                                                                                                                                                                                                                                                                                                                                                                                                                                                                                                                        |
| 18) The flu could make me severely ill                                                                                            | Scale 0-10: strongly disagree / strongly agree                                                                                                                                                                                                                                                                                                                                                                                                                                                                                                                                                                                                                                                                                          |
| 19) If I get a flu vaccine, I will be protected against the flu                                                                   | Scale 0-10: strongly disagree / strongly agree                                                                                                                                                                                                                                                                                                                                                                                                                                                                                                                                                                                                                                                                                          |
| 20) With no flu vaccine, I would feel very vulnerable to the flu                                                                  | Scale 0-10: strongly disagree / strongly agree                                                                                                                                                                                                                                                                                                                                                                                                                                                                                                                                                                                                                                                                                          |
| 21) If I got the flu, I would feel sicker than other people my age                                                                | Scale 0-10: strongly disagree / strongly agree                                                                                                                                                                                                                                                                                                                                                                                                                                                                                                                                                                                                                                                                                          |
| 22) I am confident I can avoid getting the flu, even without the flu vaccine                                                      | Scale 0-10: strongly disagree / strongly agree                                                                                                                                                                                                                                                                                                                                                                                                                                                                                                                                                                                                                                                                                          |
| 23) Without a flu vaccine, I am sure I would get the flu this winter                                                              | Scale 0-10: strongly disagree / strongly agree                                                                                                                                                                                                                                                                                                                                                                                                                                                                                                                                                                                                                                                                                          |
| 24) I feel I know enough about the flu vaccine to make an informed decision about whether to get vaccinated or not                | Scale 0-10: strongly disagree / strongly agree                                                                                                                                                                                                                                                                                                                                                                                                                                                                                                                                                                                                                                                                                          |
| 25) My physician thinks I should get a flu vaccine                                                                                | Scale 0-10: strongly disagree / strongly agree<br><input type="radio"/> I don't know/not applicable                                                                                                                                                                                                                                                                                                                                                                                                                                                                                                                                                                                                                                     |
| 26) My relatives or close friends think that I should get a flu vaccine                                                           | Scale 0-10: strongly disagree / strongly agree<br><input type="radio"/> I don't know/not applicable                                                                                                                                                                                                                                                                                                                                                                                                                                                                                                                                                                                                                                     |
| 27) If I don't get the flu vaccine and I get the flu, passing the flu to other people would worry me because it would be my fault | Scale 0-10: strongly disagree / strongly agree                                                                                                                                                                                                                                                                                                                                                                                                                                                                                                                                                                                                                                                                                          |
| 28) Which of the following statements apply to you? (Multiple select)                                                             | <input type="radio"/> It is easy for me to get to a place where I can get the flu vaccine                                                                                                                                                                                                                                                                                                                                                                                                                                                                                                                                                                                                                                               |



1  
2  
3  
4  
5  
6  
7  
8  
9  
10  
11  
12  
13  
14  
15  
16  
17  
18  
19  
20  
21  
22  
23  
24  
25  
26  
27  
28  
29  
30  
31  
32  
33  
34  
35  
36  
37  
38  
39  
40  
41  
42  
43  
44  
45  
46  
47  
48  
49  
50  
51  
52  
53  
54  
55  
56  
57  
58  
59  
60

|                                                                                                                 |                                                                  |
|-----------------------------------------------------------------------------------------------------------------|------------------------------------------------------------------|
|                                                                                                                 | ○ I can make time to get the flu vaccine                         |
| 29) If I don't get a flu vaccine and end up getting the flu this winter, I would regret not getting the vaccine | Scale 0-10: strongly disagree / strongly agree                   |
| 30) The flu vaccine is painful                                                                                  | Scale 0-10: strongly disagree / strongly agree<br>○ I don't know |
| 31) The flu vaccine could give me the flu                                                                       | Scale 0-10: strongly disagree / strongly agree                   |
| 32) I am worried that some of the contents of the flu vaccine may be dangerous for me                           | Scale 0-10: strongly disagree / strongly agree                   |
| 33) I am confident I can get a flu vaccine if I want one                                                        | Scale 0-10: strongly disagree / strongly agree                   |

For peer review only

Table S2. Determinants of influenza vaccination by influenza vaccination status – US

| Explanatory variables                                      | Min | Max | Vaccinated |      |       | Unvaccinated |           |      | SE    | 95% C.I. |       | t/X2   | df     | p-value |        |       |
|------------------------------------------------------------|-----|-----|------------|------|-------|--------------|-----------|------|-------|----------|-------|--------|--------|---------|--------|-------|
|                                                            |     |     | Total/yes  | M    | SD    | SE           | Total/yes | M    |       | SD       | SE    |        |        |         | Lower  | Upper |
| <b>1. Socio-economic, demographic and health variables</b> |     |     |            |      |       |              |           |      |       |          |       |        |        |         |        |       |
| 2) Age (dummy: 1 = ≥65)                                    | 0   | 1   | 378/105    | -    | -     | -            | 423/54    | -    | -     | -        | -     | -      | -      | 28.275  | 1.000  | 0.001 |
| 7) Eligible health condition (dummy: 1 = yes)              | 0   | 1   | 378/135    | -    | -     | -            | 423/64    | -    | -     | -        | -     | -      | -      | 45.299  | 1.000  | 0.001 |
| 9) Private health insurance (dummy: 1 = yes)               | 0   | 1   | 378/253    | -    | -     | -            | 423/234   | -    | -     | -        | -     | -      | -      | 11.293  | 1.000  | 0.001 |
| 10) Public health insurance (dummy: 1 = yes)               | 0   | 1   | 378/170    | -    | -     | -            | 423/122   | -    | -     | -        | -     | -      | -      | 22.425  | 1.000  | 0.001 |
| 3) Gender (dummy: 1 = female)                              | 0   | 1   | 378/182    | -    | -     | -            | 423/218   | -    | -     | -        | -     | -      | -      | 0.917   | 1.000  | 0.99  |
| 6) Marital status (dummy: 1 = in a partnership)            | 0   | 1   | 374/245    | -    | -     | -            | 418/236   | -    | -     | -        | -     | -      | -      | 6.777   | 1.000  | 0.01  |
| 5) Income bands (1 = ≤\$10,000 - 9 = ≥\$150,000)           | 1   | 9   | 343        | 2.97 | 1.760 | 0.106        | 392       | 5.00 | 2.239 | .113     | 0.162 | -1.207 | -0.572 | -5.495  | 733.00 | 0.001 |
| 8) Level of education (dummy: 1 = university degree)       | 0   | 1   | 365/228    | -    | -     | -            | 399/207   | -    | -     | -        | -     | -      | -      | 8.712   | 1.000  | 0.01  |
| 4) Ethnicity (dummy: 1 = white)                            | 0   | 1   | 375/262    | -    | -     | -            | 420/291   | -    | -     | -        | -     | -      | -      | 0.032   | 1.000  | 0.99  |
| <b>2. Practical barriers to influenza vaccination</b>      |     |     |            |      |       |              |           |      |       |          |       |        |        |         |        |       |
| 28) Vaccine access (dummy: 1 = yes)                        | 0   | 1   | 378/340    | -    | -     | -            | 423/317   | -    | -     | -        | -     | -      | -      | 30.484  | 1.000  | 0.001 |
| 28) Time to vaccinate (dummy: 1 = yes)                     | 0   | 1   | 378/336    | -    | -     | -            | 423/282   | -    | -     | -        | -     | -      | -      | 55.924  | 1.000  | 0.001 |
| <b>3. Social influence</b>                                 |     |     |            |      |       |              |           |      |       |          |       |        |        |         |        |       |
| 25) Physician thinks I should vaccinate*                   | 0   | 10  | 354        | 9.00 | 1.755 | 0.093        | 338       | 5.86 | 3.393 | 0.185    | 0.207 | -3.543 | -2.730 | -15.166 | 499.95 | 0.001 |
| 26) Relatives think I should vaccinate*                    | 0   | 10  | 329        | 8.02 | 2.405 | 0.133        | 361       | 4.67 | 3.277 | 0.172    | 0.218 | -3.775 | -2.921 | -15.391 | 658.72 | 0.001 |
| <b>4. Influenza perceptions</b>                            |     |     |            |      |       |              |           |      |       |          |       |        |        |         |        |       |
| 20) Vulnerability to influenza                             | 0   | 10  | 378        | 7.47 | 2.587 | 0.133        | 423       | 3.14 | 2.865 | 0.139    | 0.193 | -4.712 | -3.956 | -22.502 | 798.91 | 0.001 |
| 21) Susceptibility to influenza                            | 0   | 10  | 378        | 4.80 | 3.177 | 0.163        | 423       | 3.68 | 2.902 | 0.141    | 0.215 | -1.550 | -0.706 | -5.251  | 799.00 | 0.001 |
| 23) Likelihood of influenza                                | 0   | 10  | 378        | 5.76 | 2.868 | 0.147        | 423       | 2.22 | 2.607 | 0.127    | 0.194 | -3.926 | -3.163 | -18.226 | 766.19 | 0.001 |
| 17) Severity of influenza (bed days)                       | 1   | 6   | 378        | 2.94 | 1.149 | 0.059        | 423       | 2.66 | 1.108 | 0.054    | 0.080 | -0.437 | -0.123 | -3.510  | 799.00 | 0.001 |
| 18) Severity of influenza                                  | 0   | 10  | 378        | 7.74 | 2.591 | 0.133        | 423       | 6.36 | 2.701 | 0.131    | 0.188 | -1.745 | -1.009 | -7.341  | 799.00 | 0.001 |
| 16) Fear of influenza                                      | 0   | 10  | 378        | 5.26 | 3.276 | 0.169        | 423       | 3.57 | 2.958 | 0.144    | 0.222 | -2.132 | -1.262 | -7.659  | 764.04 | 0.001 |
| 27) Worry of transmitting influenza                        | 0   | 10  | 378        | 6.76 | 3.019 | 0.155        | 423       | 4.83 | 3.198 | 0.155    | 0.220 | -2.365 | -1.499 | -8.764  | 799.00 | 0.001 |
| 22) Perceived control (over influenza)                     | 0   | 10  | 378        | 3.68 | 3.065 | 0.158        | 423       | 6.49 | 2.741 | 0.133    | 0.206 | 2.412  | 3.222  | 13.645  | 761.04 | 0.001 |
| 29) Anticipated regret of not vaccinating                  | 0   | 10  | 378        | 7.11 | 3.118 | 0.160        | 423       | 6.66 | 2.823 | 0.137    | 0.210 | -0.862 | -0.037 | -2.141  | 799.00 | 0.05  |
| <b>5. Influenza vaccine perceptions</b>                    |     |     |            |      |       |              |           |      |       |          |       |        |        |         |        |       |
| 24) Perceived knowledge of vaccine (informed decisions)*   | 0   | 10  | 377        | 8.42 | 2.150 | 0.111        | 423       | 7.12 | 2.597 | 0.126    | 0.168 | -1.631 | -0.972 | -7.750  | 793.77 | 0.001 |
| 19) Vaccine effectiveness                                  | 0   | 10  | 378        | 7.38 | 2.172 | 0.112        | 423       | 4.12 | 2.942 | 0.143    | 0.182 | -3.612 | -2.899 | -17.934 | 772.19 | 0.001 |
| 30) The vaccine is painful*                                | 0   | 10  | 377        | 3.00 | 3.231 | 0.166        | 356       | 3.73 | 3.099 | 0.164    | 0.234 | 0.271  | 1.190  | 3.120   | 731.00 | 0.01  |
| 31) The vaccine could transmit influenza                   | 0   | 10  | 378        | 3.01 | 3.270 | 0.168        | 423       | 5.58 | 3.222 | 0.157    | 0.230 | 2.128  | 3.029  | 11.228  | 799.00 | 0.001 |
| 32) Vaccine contents could be dangerous                    | 0   | 10  | 378        | 3.03 | 3.173 | 0.163        | 423       | 5.31 | 3.364 | 0.164    | 0.232 | 1.828  | 2.738  | 9.849   | 799.00 | 0.001 |
| 33) Vaccine-related self-efficacy                          | 0   | 10  | 378        | 7.93 | 2.736 | 0.141        | 423       | 4.20 | 3.389 | 0.165    | 0.217 | -4.156 | -3.305 | -17.213 | 791.02 | 0.001 |

| Explanatory variables                                      | Min | Max | Vaccinated |      |       | Unvaccinated |        |      | SE    | 95% C.I. |       | t / $\chi^2$ | df     | p <     |        |       |
|------------------------------------------------------------|-----|-----|------------|------|-------|--------------|--------|------|-------|----------|-------|--------------|--------|---------|--------|-------|
|                                                            |     |     | N          | Mean | SD    | SE           | N      | Mean |       | SD       | SE    |              |        |         | Lower  | Upper |
| <b>6. Trust in vaccination stakeholders</b>                |     |     |            |      |       |              |        |      |       |          |       |              |        |         |        |       |
| 12) Trust physician (scale)                                | 0   | 7   | 378        | 7.94 | 2.261 | 0.119        | 423    | 4.35 | 1.561 | 0.076    | 0.115 | -0.579       | -0.129 | -3.087  | 773.65 | 0.01  |
| 13) Trust in vaccine manufacturers                         | 0   | 10  | 378        | 7.04 | 2.212 | 0.114        | 423    | 4.78 | 2.732 | 0.133    | 0.181 | -2.209       | -1.499 | -10.255 | 798.57 | 0.001 |
| 14) Trust in the NHS                                       | 0   | 10  | 378        | 4.71 | 1.672 | 0.086        | 423    | 5.47 | 2.751 | 0.134    | 0.176 | -1.914       | -1.225 | -8.937  | 790.44 | 0.001 |
| <b>7. Shared decision-making and childhood experiences</b> |     |     |            |      |       |              |        |      |       |          |       |              |        |         |        |       |
| 11) Shared decision-making – physician                     | 1   | 5   | 378        | 3.03 | 0.889 | 0.046        | 423    | 3.30 | 0.953 | 0.046    | 0.065 | 0.141        | 0.396  | 4.127   | 797.52 | 0.001 |
| 15) Bad experience with vaccines (child)                   | 0   | 1   | 378/41     | -    | -     | -            | 423/36 | -    | -     | -        | -     | -            | -      | 1.254   | 1.000  | 0.99  |
| 15) Scary health experience (child)                        | 0   | 1   | 378/48     | -    | -     | -            | 423/31 | -    | -     | -        | -     | -            | -      | 6.475   | 1.000  | 0.01  |

C.I. = confidence interval; df = degrees of freedom; DoH = Department of Health; HCP = healthcare professional; p = p-value; SD = standard deviation; SE = standard error. df with decimals are adjusted to correct for the violation of the assumption of equal variances (Levene's Test for Equality of Variances was statistically significant). p-values were obtained using Chi-square tests ( $\chi^2$ ) for categorical variables and Independent t-tests (t) for interval or continuous variables. p < 0.05 was considered statistically significant. \*Variables with "I do not know" responses which were dichotomised for regression analysis. In brackets is the number of the question corresponding to each explanatory variable (see Table S1).

**Table S3.** Determinants of influenza vaccination by influenza vaccination status – UK

| Explanatory variables                                      | Min | Max | Vaccinated |      |        | Unvaccinated |           |      | SE     | 95% C.I. |        | t/X2   | df     | p-value |        |       |
|------------------------------------------------------------|-----|-----|------------|------|--------|--------------|-----------|------|--------|----------|--------|--------|--------|---------|--------|-------|
|                                                            |     |     | Total/yes  | M    | SD     | SE           | Total/yes | M    |        | SD       | SE     |        |        |         | Lower  | Upper |
| <b>1. Socio-economic, demographic and health variables</b> |     |     |            |      |        |              |           |      |        |          |        |        |        |         |        |       |
| 2) Age (dummy: 1 = ≥65)                                    | 0   | 1   | 302/134    | -    | -      | -            | 504/45    | -    | -      | -        | -      | -      | -      | 137.30  | 1.000  | 0.001 |
| 7) Eligible health condition (dummy: 1 = yes)              | 0   | 1   | 302/141    | -    | -      | -            | 504/42    | -    | -      | -        | -      | -      | -      | 166.87  | 1.000  | 0.001 |
| 9) Private health insurance (dummy: 1 = yes)               | 0   | 1   | 302/52     | -    | -      | -            | 504/57    | -    | -      | -        | -      | -      | -      | 5.638   | 1.000  | 0.05  |
| 3) Gender (dummy: 1 = female)                              | 0   | 1   | 302/147    | -    | -      | -            | 504/266   | -    | -      | -        | -      | -      | -      | 1.272   | 1.000  | 0.99  |
| 6) Marital status (dummy: 1 = in a partnership)            | 0   | 1   | 300/177    | -    | -      | -            | 501/270   | -    | -      | -        | -      | -      | -      | 1.985   | 1.000  | 0.99  |
| 5) Income bands (1 = ≤£10,000 - 8 = ≥£70,000)              | 1   | 8   | 274        | 2.97 | 1.760  | 0.106        | 472       | 3.19 | 1.853  | 0.086    | 0.139  | -0.055 | 0.490  | 1.568   | 734.00 | 0.99  |
| 8) Level of education (dummy: 1 = university degree)       | 0   | 1   | 292/103    | -    | -      | -            | 492/198   | -    | -      | -        | -      | -      | -      | 1.914   | 1.000  | 0.99  |
| 4) Ethnicity (1 = white)                                   | 0   | 1   | 302/278    | -    | -      | -            | 497/435   | -    | -      | -        | -      | -      | -      | 4.010   | 1.000  | 0.05  |
| <b>2. Practical barriers to influenza vaccination</b>      |     |     |            |      |        |              |           |      |        |          |        |        |        |         |        |       |
| 28) Vaccine access (dummy: 1 = yes)                        | 0   | 1   | 302/281    | -    | -      | -            | 504/371   | -    | -      | -        | -      | -      | -      | 46.151  | 1.000  | 0.001 |
| 28) Time to vaccinate (dummy: 1 = yes)                     | 0   | 1   | 302/270    | -    | -      | -            | 504/360   | -    | -      | -        | -      | -      | -      | 35.750  | 1.000  | 0.001 |
| <b>3. Social influence</b>                                 |     |     |            |      |        |              |           |      |        |          |        |        |        |         |        |       |
| 25) Physician thinks I should vaccinate*                   | 0   | 10  | 271        | 8.86 | 1.943  | 0.118        | 370       | 3.38 | 3.307  | 0.182    | 0.217  | -5.906 | -5.054 | -25.261 | 546.17 | 0.001 |
| 26) Relatives think I should vaccinate*                    | 0   | 10  | 255        | 7.52 | 2.691  | 0.169        | 390       | 2.80 | 3.005  | 0.152    | 0.227  | -5.161 | -4.269 | -20.767 | 583.61 | 0.001 |
| <b>4. Influenza perceptions</b>                            |     |     |            |      |        |              |           |      |        |          |        |        |        |         |        |       |
| 20) Vulnerability to influenza                             | 0   | 10  | 302        | 7.22 | 2.6893 | 0.155        | 504       | 3.10 | 2.5019 | 0.111    | -4.112 | -4.480 | -3.744 | -21.956 | 804.00 | 0.001 |
| 21) Susceptibility to influenza                            | 0   | 10  | 302        | 5.28 | 3.162  | 0.182        | 504       | 3.36 | 2.805  | 0.125    | -1.924 | -2.358 | -1.491 | -8.719  | 575.29 | 0.001 |
| 23) Likelihood of influenza                                | 0   | 10  | 302        | 5.66 | 2.707  | 0.156        | 504       | 2.31 | 2.480  | 0.110    | -3.348 | -3.715 | -2.981 | -17.921 | 804.00 | 0.001 |
| 17) Severity of influenza (bed days)                       | 1   | 6   | 302        | 3.14 | 1.216  | 0.070        | 504       | 2.83 | 1.227  | 0.055    | -0.311 | -0.486 | -0.136 | -3.496  | 804.00 | 0.001 |
| 18) Severity of influenza                                  | 0   | 10  | 302        | 7.90 | 2.396  | 0.138        | 504       | 6.06 | 2.552  | 0.114    | -1.836 | -2.187 | -1.485 | -10.273 | 665.45 | 0.001 |
| 16) Fear of influenza                                      | 0   | 10  | 302        | 4.87 | 3.200  | 0.184        | 504       | 3.14 | 2.696  | 0.120    | -1.732 | -2.164 | -1.300 | -7.879  | 551.80 | 0.001 |
| 27) Worry of transmitting influenza                        | 0   | 10  | 302        | 6.64 | 2.900  | 0.167        | 504       | 4.70 | 2.920  | 0.130    | -1.937 | -2.353 | -1.521 | -9.140  | 804.00 | 0.001 |
| 22) Perceived control (over influenza)                     | 0   | 10  | 302        | 3.21 | 2.703  | 0.156        | 504       | 5.68 | 2.595  | 0.116    | 2.472  | 2.095  | 2.849  | 12.886  | 804.00 | 0.001 |
| 29) Anticipated regret of not vaccinating                  | 0   | 10  | 302        | 8.52 | 2.176  | 0.125        | 504       | 3.94 | 3.027  | 0.135    | -4.582 | -4.943 | -4.221 | -24.901 | 777.86 | 0.001 |
| <b>5. Influenza vaccine perceptions</b>                    |     |     |            |      |        |              |           |      |        |          |        |        |        |         |        |       |
| 24) Perceived knowledge of vaccine (informed decisions)*   | 0   | 10  | 301        | 8.26 | 2.033  | 0.117        | 502       | 6.44 | 2.611  | 0.117    | -1.826 | -2.151 | -1.502 | -11.050 | 748.41 | 0.001 |
| 19) Vaccine effectiveness                                  | 0   | 10  | 302        | 7.50 | 2.194  | 0.126        | 504       | 5.24 | 2.768  | 0.123    | -2.257 | -2.603 | -1.910 | -12.786 | 743.90 | 0.001 |
| 30) The vaccine is painful*                                | 0   | 10  | 299        | 2.38 | 2.958  | 0.171        | 364       | 3.06 | 2.899  | 0.152    | 0.228  | 0.231  | 1.128  | 2.977   | 661.00 | 0.01  |
| 31) The vaccine could transmit influenza                   | 0   | 10  | 302        | 2.80 | 3.090  | 0.178        | 504       | 4.18 | 3.019  | 0.135    | 1.377  | 0.941  | 1.812  | 6.210   | 804.00 | 0.001 |
| 32) Vaccine contents could be dangerous                    | 0   | 10  | 302        | 2.41 | 2.758  | 0.159        | 504       | 3.42 | 2.992  | 0.133    | 1.008  | 0.601  | 1.415  | 4.863   | 674.42 | 0.001 |
| 33) Vaccine-related self-efficacy                          | 0   | 10  | 302        | 9.05 | 1.803  | 0.104        | 504       | 7.16 | 2.880  | 0.128    | -1.890 | -2.214 | -1.566 | -11.449 | 802.47 | 0.001 |

| Explanatory variables                                      | Min | Max | Vaccinated |      |       | Unvaccinated |        |      | SE    | 95% C.I. |        | t / $\chi^2$ | df     | p <    |        |       |
|------------------------------------------------------------|-----|-----|------------|------|-------|--------------|--------|------|-------|----------|--------|--------------|--------|--------|--------|-------|
|                                                            |     |     | N          | Mean | SD    | SE           | N      | Mean |       | SD       | SE     |              |        |        | Lower  | Upper |
| <b>6. Trust in vaccination stakeholders</b>                |     |     |            |      |       |              |        |      |       |          |        |              |        |        |        |       |
| 12) Trust physician (scale)                                | 0   | 7   | 302        | 4.68 | 1.742 | 0.100        | 504    | 3.99 | 1.538 | 0.069    | -0.687 | -0.925       | -0.448 | -5.655 | 572.95 | 0.001 |
| 13) Trust in vaccine manufacturers                         | 0   | 10  | 302        | 6.71 | 2.187 | 0.126        | 504    | 5.58 | 2.513 | 0.112    | -1.127 | -1.458       | -0.796 | -6.691 | 702.58 | 0.001 |
| 14) Trust in the NHS                                       | 0   | 10  | 302        | 7.71 | 1.954 | 0.112        | 504    | 6.86 | 2.156 | 0.096    | -0.849 | -1.146       | -0.551 | -5.599 | 804.00 | 0.001 |
| <b>7. Shared decision-making and childhood experiences</b> |     |     |            |      |       |              |        |      |       |          |        |              |        |        |        |       |
| 11) Shared decision-making – physician                     | 1   | 5   | 302        | 2.85 | 0.908 | 0.052        | 504    | 3.21 | 1.000 | 0.045    | 0.357  | 0.223        | 0.492  | 5.203  | 681.88 | 0.001 |
| 15) Bad experience with vaccines (child)                   | 0   | 1   | 302/22     | -    | -     | -            | 504/63 | -    | -     | -        | -      | -            | -      | 5.445  | 1.000  | 0.05  |
| 15) Scary health experience (child)                        | 0   | 1   | 302/58     | -    | -     | -            | 504/45 | -    | -     | -        | -      | -            | -      | 17.893 | 1.000  | 0.001 |

C.I. = confidence interval; df = degrees of freedom; NHS = National Health Service; HCP = healthcare professional; p = p-value; SD = standard deviation; SE = standard error. df with decimals are adjusted to correct for the violation of the assumption of equal variances (Levene's Test for Equality of Variances was statistically significant). p-values were obtained using Chi-square tests ( $\chi^2$ ) for categorical variables and Independent t-tests (t) for interval or continuous variables. p < 0.05 was considered statistically significant. \*Variables with "I do not know" responses which were dichotomised for regression analysis. In brackets is the number of the question corresponding to each explanatory variable (see Table S1).

Table S4. Determinants of influenza vaccination by influenza vaccination status – France

| Explanatory variables                                      | Min | Max | Vaccinated |      |       | Unvaccinated |           |      | SE    | 95% C.I. |       | t/X2   | df     | p-value |        |       |
|------------------------------------------------------------|-----|-----|------------|------|-------|--------------|-----------|------|-------|----------|-------|--------|--------|---------|--------|-------|
|                                                            |     |     | Total/yes  | M    | SD    | SE           | Total/yes | M    |       | SD       | Lower |        |        |         | Upper  |       |
| <b>1. Socio-economic, demographic and health variables</b> |     |     |            |      |       |              |           |      |       |          |       |        |        |         |        |       |
| 2) Age (dummy: 1 = ≥65)                                    | 0   | 1   | 192/95     | -    | -     | -            | 613/94    | -    | -     | -        | -     | -      | -      | 94.877  | 1.000  | 0.001 |
| 7) Eligible health condition (dummy: 1 = yes)              | 0   | 1   | 192/71     | -    | -     | -            | 613/120   | -    | -     | -        | -     | -      | -      | 24.469  | 1.000  | 0.001 |
| 9) Private health insurance (dummy: 1 = yes)               | 0   | 1   | 192/180    | -    | -     | -            | 613/529   | -    | -     | -        | -     | -      | -      | 7.732   | 1.000  | 0.005 |
| 3) Gender (dummy: 1 = female)                              | 0   | 1   | 192/97     | -    | -     | -            | 613/334   | -    | -     | -        | -     | -      | -      | 0.924   | 1.000  | 0.99  |
| 6) Marital status (dummy: 1 = in a partnership)            | 0   | 1   | 190/120    | -    | -     | -            | 605/314   | -    | -     | -        | -     | -      | -      | 7.391   | 1.000  | 0.01  |
| 5) Income bands (1 = ≤€15,000 - 6 = ≥€70,000)              | 1   | 6   | 165        | 2.78 | 1.269 | 0.099        | 539       | 2.35 | 1.272 | 0.055    | 0.11  | -0.65  | -0.21  | -3.81   | 702.00 | 0.001 |
| 8) Level of education (dummy: 1 = university degree)       | 0   | 1   | 182/64     | -    | -     | -            | 570/171   | -    | -     | -        | -     | -      | -      | 1.713   | 1.000  | 0.99  |
| <b>2. Practical barriers to influenza vaccination</b>      |     |     |            |      |       |              |           |      |       |          |       |        |        |         |        |       |
| 28) Vaccine access (dummy: 1 = yes)                        | 0   | 1   | 192/159    | -    | -     | -            | 613/445   | -    | -     | -        | -     | -      | -      | 8.149   | 1.000  | 0.01  |
| 28) Time to vaccinate (dummy: 1 = yes)                     | 0   | 1   | 192/165    | -    | -     | -            | 613/436   | -    | -     | -        | -     | -      | -      | 16.954  | 1.000  | 0.001 |
| <b>3. Social influence</b>                                 |     |     |            |      |       |              |           |      |       |          |       |        |        |         |        |       |
| 25) Physician thinks I should vaccinate*                   | 0   | 10  | 180        | 8.11 | 2.536 | 0.189        | 490       | 3.58 | 3.120 | 0.141    | 0.24  | -4.99  | -4.06  | -19.20  | 389.34 | 0.001 |
| 26) Relatives think I should vaccinate*                    | 0   | 10  | 160        | 6.57 | 3.097 | 0.245        | 532       | 2.92 | 2.879 | 0.125    | 0.264 | -4.163 | -3.125 | -13.790 | 690.00 | 0.001 |
| <b>4. Influenza perceptions</b>                            |     |     |            |      |       |              |           |      |       |          |       |        |        |         |        |       |
| 20) Vulnerability to influenza                             | 0   | 10  | 192        | 6.53 | 3.020 | 0.218        | 613       | 3.20 | 2.720 | 0.110    | 0.231 | -3.784 | -2.877 | -14.410 | 803.00 | 0.001 |
| 21) Susceptibility to influenza                            | 0   | 10  | 192        | 4.24 | 3.160 | 0.228        | 613       | 3.33 | 2.917 | 0.118    | 0.246 | -1.390 | -0.424 | -3.683  | 803.00 | 0.001 |
| 23) Likelihood of influenza                                | 0   | 10  | 192        | 4.51 | 3.018 | 0.218        | 613       | 2.12 | 2.424 | 0.098    | 0.239 | -2.855 | -1.914 | -9.984  | 272.52 | 0.001 |
| 17) Severity of influenza (bed days)                       | 1   | 6   | 192        | 3.19 | 1.153 | 0.083        | 613       | 3.03 | 1.110 | 0.045    | 0.093 | -0.340 | 0.023  | -1.710  | 803.00 | 0.1   |
| 18) Severity of influenza                                  | 0   | 10  | 192        | 7.24 | 2.628 | 0.190        | 613       | 5.34 | 2.782 | 0.112    | 0.227 | -2.344 | -1.453 | -8.359  | 803.00 | 0.001 |
| 16) Fear of influenza                                      | 0   | 10  | 192        | 4.44 | 3.442 | 0.248        | 613       | 2.91 | 2.819 | 0.114    | 0.273 | -2.072 | -0.996 | -5.613  | 275.89 | 0.001 |
| 27) Worry of transmitting influenza                        | 0   | 10  | 192        | 6.81 | 2.780 | 0.201        | 613       | 4.95 | 2.925 | 0.118    | 0.239 | -2.327 | -1.389 | -7.771  | 803.00 | 0.001 |
| 22) Perceived control (over influenza)                     | 0   | 10  | 192        | 3.02 | 2.982 | 0.215        | 613       | 4.89 | 2.899 | 0.117    | 0.241 | 1.400  | 2.347  | 7.761   | 803.00 | 0.001 |
| 29) Anticipated regret of not vaccinating                  | 0   | 10  | 192        | 8.22 | 2.562 | 0.185        | 613       | 7.44 | 2.572 | 0.104    | 0.212 | -1.197 | -0.363 | -3.672  | 803.00 | 0.001 |
| <b>5. Influenza vaccine perceptions</b>                    |     |     |            |      |       |              |           |      |       |          |       |        |        |         |        |       |
| 24) Perceived knowledge of vaccine (informed decisions)*   | 0   | 10  | 192        | 7.86 | 2.186 | 0.158        | 613       | 6.44 | 2.637 | 0.106    | 0.190 | -1.803 | -1.055 | -7.508  | 380.14 | 0.001 |
| 19) Vaccine effectiveness                                  | 0   | 10  | 192        | 7.25 | 2.281 | 0.165        | 613       | 4.52 | 2.840 | 0.115    | 0.201 | -3.121 | -2.332 | -13.588 | 392.51 | 0.001 |
| 30) The vaccine is painful*                                | 0   | 10  | 190        | 1.68 | 2.678 | 0.194        | 449       | 2.59 | 2.649 | 0.125    | 0.231 | 0.454  | 1.363  | 3.931   | 352.50 | 0.001 |
| 31) The vaccine could transmit influenza                   | 0   | 10  | 192        | 2.98 | 2.970 | 0.214        | 613       | 4.46 | 3.063 | 0.124    | 0.251 | 0.977  | 1.964  | 5.848   | 803.00 | 0.001 |
| 32) Vaccine contents could be dangerous                    | 0   | 10  | 192        | 2.99 | 3.077 | 0.222        | 613       | 5.14 | 3.316 | 0.134    | 0.270 | 1.621  | 2.680  | 7.976   | 803.00 | 0.001 |
| 33) Vaccine-related self-efficacy                          | 0   | 10  | 192        | 8.04 | 2.561 | 0.185        | 613       | 3.92 | 3.214 | 0.130    | 0.226 | -4.559 | -3.671 | -18.218 | 395.86 | 0.001 |

| Explanatory variables                                      | Min | Max | Vaccinated |      |       | Unvaccinated |        |      | SE    | 95% C.I. |       | t / $\chi^2$ | df     | p <    |        |       |
|------------------------------------------------------------|-----|-----|------------|------|-------|--------------|--------|------|-------|----------|-------|--------------|--------|--------|--------|-------|
|                                                            |     |     | N          | Mean | SD    | SE           | N      | Mean |       | SD       | SE    |              |        |        | Lower  | Upper |
| <b>6. Trust in vaccination stakeholders</b>                |     |     |            |      |       |              |        |      |       |          |       |              |        |        |        |       |
| 12) Trust physician (scale)                                | 0   | 7   | 192        | 4.97 | 1.447 | 0.104        | 613    | 4.39 | 1.483 | 0.060    | 0.122 | -0.820       | -0.341 | -4.761 | 803.00 | 0.001 |
| 13) Trust in vaccine manufacturers                         | 0   | 10  | 192        | 6.18 | 2.345 | 0.169        | 613    | 4.82 | 2.553 | 0.103    | 0.207 | -1.763       | -0.950 | -6.548 | 803.00 | 0.001 |
| 14) Trust in the NHS                                       | 0   | 10  | 192        | 6.29 | 2.537 | 0.183        | 613    | 5.44 | 2.461 | 0.099    | 0.205 | -1.250       | -0.445 | -4.135 | 803.00 | 0.001 |
| <b>7. Shared decision-making and childhood experiences</b> |     |     |            |      |       |              |        |      |       |          |       |              |        |        |        |       |
| 11) Shared decision-making – physician                     | 1   | 5   | 192        | 2.49 | 2.557 | 0.106        | 613    | 2.90 | 0.962 | 0.039    | 0.071 | -0.077       | 0.204  | 0.890  | 364.72 | 0.99  |
| 15) Bad experience with vaccines (child)                   | 0   | 1   | 192/20     | -    | -     | -            | 613/96 | -    | -     | -        | -     | -            | -      | 3.260  | 1.000  | 0.1   |
| 15) Scary health experience (child)                        | 0   | 1   | 192/31     | -    | -     | -            | 613/34 | -    | -     | -        | -     | -            | -      | 22.129 | 1.000  | 0.001 |

C.I. = confidence interval; df = degrees of freedom; HCP = healthcare professional; MH = Ministry of Health; p = p-value; SD = standard deviation; SE = standard error. df with decimals are adjusted to correct for the violation of the assumption of equal variances (Levene's Test for Equality of Variances was statistically significant). p-values were obtained using Chi-square tests ( $\chi^2$ ) for categorical variables and Independent t-tests (t) for interval or continuous variables. p < 0.05 was considered statistically significant. \*Variables with "I do not know" responses which were dichotomised for regression analysis. In brackets is the number of the question corresponding to each explanatory variable (see Table S1).

**Table S5.** Reliability analysis of socio-psychological scales across the three countries

| Explanatory variables                    | US                |                                  | UK                |                                  | France            |                                  |
|------------------------------------------|-------------------|----------------------------------|-------------------|----------------------------------|-------------------|----------------------------------|
|                                          | Cronbach $\alpha$ | Corrected Item-Total Correlation | Cronbach $\alpha$ | Corrected Item-Total Correlation | Cronbach $\alpha$ | Corrected Item-Total Correlation |
| <b>Social influence</b>                  | <b>0.87</b>       |                                  | <b>0.85</b>       |                                  | <b>0.82</b>       |                                  |
| Physician thinks I should vaccinate      |                   | 0.78                             |                   | 0.74                             |                   | 0.69                             |
| Relatives think I should vaccinate       |                   | 0.78                             |                   | 0.74                             |                   | 0.69                             |
| <b>Influenza perceptions</b>             | <b>0.83</b>       |                                  | <b>0.80</b>       |                                  | <b>0.82</b>       |                                  |
| Vulnerability to influenza               |                   | 0.78                             |                   | 0.72                             |                   | 0.76                             |
| Susceptibility to influenza              |                   | 0.48                             |                   | 0.50                             |                   | 0.52                             |
| Likelihood of influenza                  |                   | 0.64                             |                   | 0.56                             |                   | 0.66                             |
| Severity of influenza                    |                   | 0.61                             |                   | 0.59                             |                   | 0.57                             |
| Severity of influenza (bed days)         |                   | 0.58                             |                   | 0.50                             |                   | 0.52                             |
| Fear of influenza                        |                   | 0.47                             |                   | 0.53                             |                   | 0.45                             |
| Worry of transmitting influenza          |                   | 0.28                             |                   | 0.23                             |                   | 0.22                             |
| Perceived control (over influenza)*      |                   | 0.32                             |                   | 0.14                             |                   | 0.35                             |
| Anticipated regret of not vaccinating    |                   | 0.61                             |                   | 0.63                             |                   | 0.67                             |
| <b>Influenza vaccine perceptions</b>     | <b>0.72</b>       |                                  | <b>0.65</b>       |                                  | <b>0.72</b>       |                                  |
| Vaccine contents could be dangerous*     |                   | 0.69                             |                   | 0.58                             |                   | 0.62                             |
| The vaccine could transmit influenza*    |                   | 0.65                             |                   | 0.56                             |                   | 0.61                             |
| The vaccine is painful*                  |                   | 0.39                             |                   | 0.32                             |                   | 0.45                             |
| Vaccine effectiveness                    |                   | 0.32                             |                   | 0.25                             |                   | 0.24                             |
| <b>Trust in vaccination stakeholders</b> | <b>0.86</b>       |                                  | <b>0.82</b>       |                                  | <b>0.72</b>       |                                  |
| Trust in vaccine manufacturers           |                   | 0.75                             |                   | 0.69                             |                   | 0.57                             |
| Trust in health authorities              |                   | 0.75                             |                   | 0.69                             |                   | 0.57                             |

Continuous scales were used for reliability analyses. "I don't know/not applicable" responses were coded as missing for the purpose of this analysis. \*items that were reverse-scored to perform reliability analyses. The items "vaccine-related self-efficacy", "perceived knowledge of vaccine" and "trust in GP (scale)" were not included because the former belong to different constructs and the latter is a standalone scale.



STROBE Statement—Checklist of items that should be included in reports of *cross-sectional studies*

|                              | Item No | Recommendation                                                                                                                                                                                                                                                                                                                                                                                                                                                                        |
|------------------------------|---------|---------------------------------------------------------------------------------------------------------------------------------------------------------------------------------------------------------------------------------------------------------------------------------------------------------------------------------------------------------------------------------------------------------------------------------------------------------------------------------------|
| <b>Title and abstract</b>    | 1       | (a) Indicate the study's design with a commonly used term in the title or the abstract [Page 1]<br>(b) Provide in the abstract an informative and balanced summary of what was done and what was found [Page 2]                                                                                                                                                                                                                                                                       |
| <b>Introduction</b>          |         |                                                                                                                                                                                                                                                                                                                                                                                                                                                                                       |
| Background/rationale         | 2       | Explain the scientific background and rationale for the investigation being reported [Pages 4-6]                                                                                                                                                                                                                                                                                                                                                                                      |
| Objectives                   | 3       | State specific objectives, including any prespecified hypotheses [Page 6]                                                                                                                                                                                                                                                                                                                                                                                                             |
| <b>Methods</b>               |         |                                                                                                                                                                                                                                                                                                                                                                                                                                                                                       |
| Study design                 | 4       | Present key elements of study design early in the paper [Pages 6-9]                                                                                                                                                                                                                                                                                                                                                                                                                   |
| Setting                      | 5       | Describe the setting, locations, and relevant dates, including periods of recruitment, exposure, follow-up, and data collection [Page 6]                                                                                                                                                                                                                                                                                                                                              |
| Participants                 | 6       | (a) Give the eligibility criteria, and the sources and methods of selection of participants [Pages 6, 7 and 10]                                                                                                                                                                                                                                                                                                                                                                       |
| Variables                    | 7       | Clearly define all outcomes, exposures, predictors, potential confounders, and effect modifiers. Give diagnostic criteria, if applicable [Pages 7-9 and Table S1 in Supplementary material]                                                                                                                                                                                                                                                                                           |
| Data sources/<br>measurement | 8*      | For each variable of interest, give sources of data and details of methods of assessment (measurement). Describe comparability of assessment methods if there is more than one group [Page 8-9 and Table S1 in Supplementary material]                                                                                                                                                                                                                                                |
| Bias                         | 9       | Describe any efforts to address potential sources of bias [Pages 6-9]                                                                                                                                                                                                                                                                                                                                                                                                                 |
| Study size                   | 10      | Explain how the study size was arrived at [Page 6]                                                                                                                                                                                                                                                                                                                                                                                                                                    |
| Quantitative variables       | 11      | Explain how quantitative variables were handled in the analyses. If applicable, describe which groupings were chosen and why [Pages 8-9 and Box S2 in Supplementary material]                                                                                                                                                                                                                                                                                                         |
| Statistical methods          | 12      | (a) Describe all statistical methods, including those used to control for confounding [Pages 8-9 and Box S2 in Supplementary material]<br>(b) Describe any methods used to examine subgroups and interactions [Pages 8-9]<br>(c) Explain how missing data were addressed [Page 8]<br>(d) If applicable, describe analytical methods taking account of sampling strategy [N/A]<br>(e) Describe any sensitivity analyses [Page 8-9]                                                     |
| <b>Results</b>               |         |                                                                                                                                                                                                                                                                                                                                                                                                                                                                                       |
| Participants                 | 13*     | (a) Report numbers of individuals at each stage of study—eg numbers potentially eligible, examined for eligibility, confirmed eligible, included in the study, completing follow-up, and analysed [Page 9-10 and Figures S1a-S3a and S1b-S3b in Supplementary material]<br>(b) Give reasons for non-participation at each stage [Figures S1a-S3a and S1b-S3b in Supplementary material]<br>(c) Consider use of a flow diagram [Figures S1a-S3a and S1b-S3b in Supplementary material] |
| Descriptive data             | 14*     | (a) Give characteristics of study participants (eg demographic, clinical, social) and information on exposures and potential confounders [Table 1 and Tables S2-S4 in Supplementary material]                                                                                                                                                                                                                                                                                         |

|                          |     |                                                                                                                                                                                                                                                                                                                                                                                                                                                         |
|--------------------------|-----|---------------------------------------------------------------------------------------------------------------------------------------------------------------------------------------------------------------------------------------------------------------------------------------------------------------------------------------------------------------------------------------------------------------------------------------------------------|
|                          |     | (b) Indicate number of participants with missing data for each variable of interest [Tables S2-S4 in Supplementary material]                                                                                                                                                                                                                                                                                                                            |
| Outcome data             | 15* | Report numbers of outcome events or summary measures [Tables S2-S4 in Supplementary material]                                                                                                                                                                                                                                                                                                                                                           |
| Main results             | 16  | (a) Give unadjusted estimates and, if applicable, confounder-adjusted estimates and their precision (eg, 95% confidence interval). Make clear which confounders were adjusted for and why they were included [Page 12 and Tables 2-4]<br>(b) Report category boundaries when continuous variables were categorized [Page 8-9]<br>(c) If relevant, consider translating estimates of relative risk into absolute risk for a meaningful time period [N/A] |
| Other analyses           | 17  | Report other analyses done—eg analyses of subgroups and interactions, and sensitivity analyses [Page 10, 12 and 19]                                                                                                                                                                                                                                                                                                                                     |
| <b>Discussion</b>        |     |                                                                                                                                                                                                                                                                                                                                                                                                                                                         |
| Key results              | 18  | Summarise key results with reference to study objectives [Pages 20, 22-24 and Table 5]                                                                                                                                                                                                                                                                                                                                                                  |
| Limitations              | 19  | Discuss limitations of the study, taking into account sources of potential bias or imprecision. Discuss both direction and magnitude of any potential bias [Pages 25-26-28]                                                                                                                                                                                                                                                                             |
| Interpretation           | 20  | Give a cautious overall interpretation of results considering objectives, limitations, multiplicity of analyses, results from similar studies, and other relevant evidence [Pages 20, 22-26]                                                                                                                                                                                                                                                            |
| Generalisability         | 21  | Discuss the generalisability (external validity) of the study results [26-27]                                                                                                                                                                                                                                                                                                                                                                           |
| <b>Other information</b> |     |                                                                                                                                                                                                                                                                                                                                                                                                                                                         |
| Funding                  | 22  | Give the source of funding and the role of the funders for the present study and, if applicable, for the original study on which the present article is based [29]                                                                                                                                                                                                                                                                                      |

\*Give information separately for exposed and unexposed groups.

**Note:** An Explanation and Elaboration article discusses each checklist item and gives methodological background and published examples of transparent reporting. The STROBE checklist is best used in conjunction with this article (freely available on the Web sites of PLoS Medicine at <http://www.plosmedicine.org/>, Annals of Internal Medicine at <http://www.annals.org/>, and Epidemiology at <http://www.epidem.com/>). Information on the STROBE Initiative is available at [www.strobe-statement.org](http://www.strobe-statement.org).
