# Supplementary material for: Evaluating the importance of policy amenable factors in explaining influenza vaccination: a cross-sectional multinational study
Source: PubMed Central journal article supplement — BMJ Open. 2017 Jul 12;7(7):e014668. doi: 10.1136/bmjopen-2016-014668 (PMC5734251; doi:10.1136/bmjopen-2016-014668), 2017-07-12
Supplement: bmjopen-2016-014668supp001.pdf [file bmjopen-2016-014668supp001.pdf]

## SUPPLEMENTARY MATERIAL

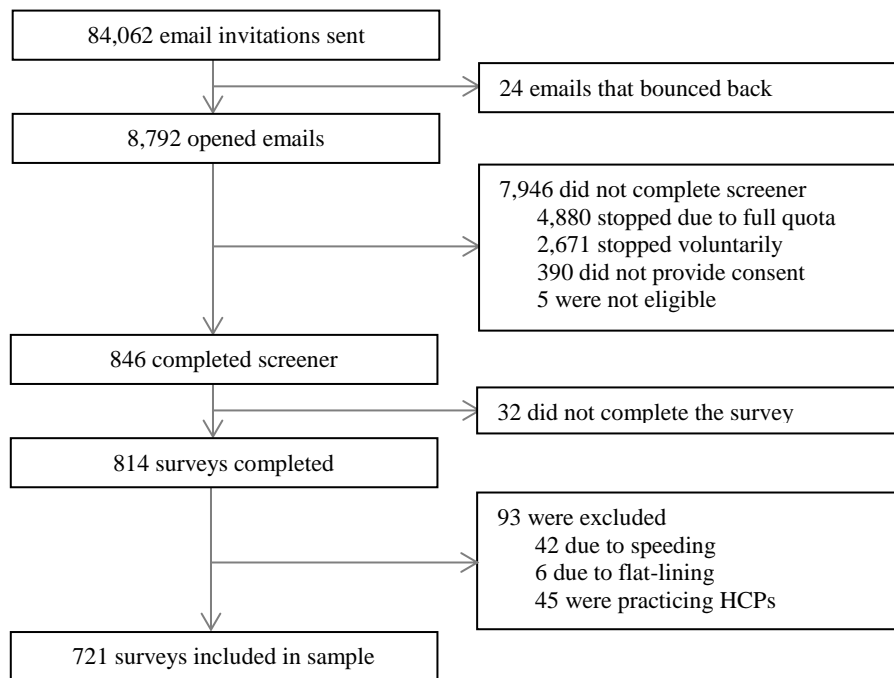

**Figure S1a.** Online sample recruitment flow diagram – US

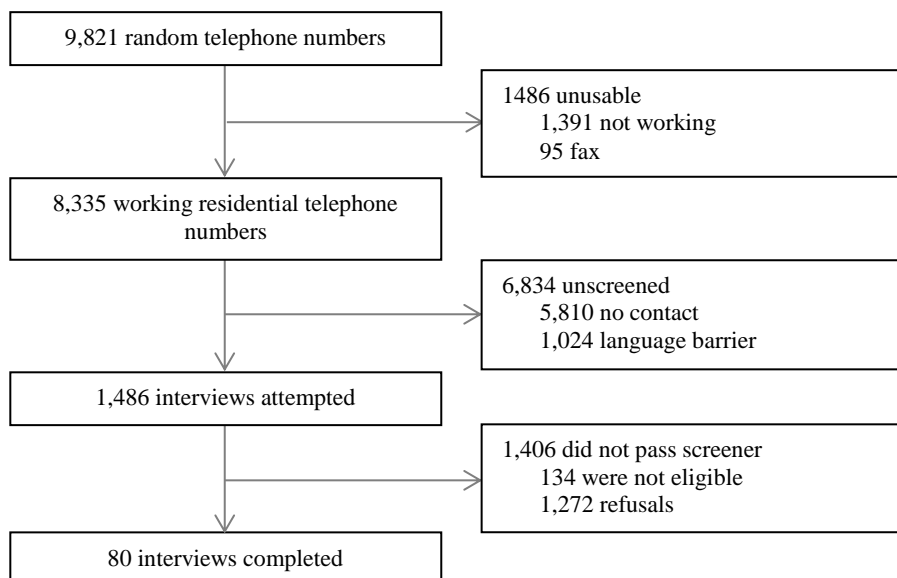

**Figure S1b.** Telephone sample recruitment flow diagram – US

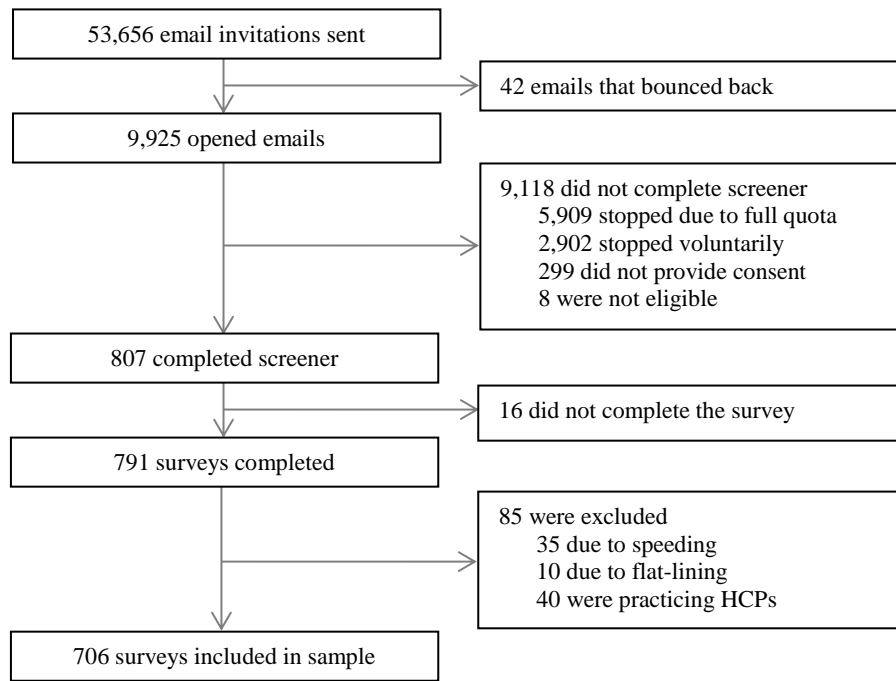

**Figure S2a.** Online sample recruitment flow diagram – UK

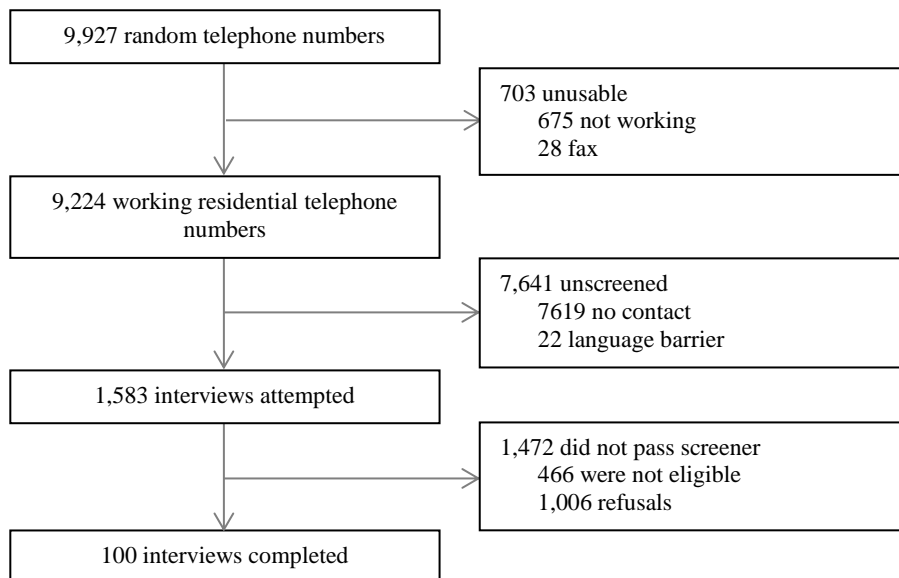

**Figure S2b.** Telephone sample recruitment flow diagram – UK

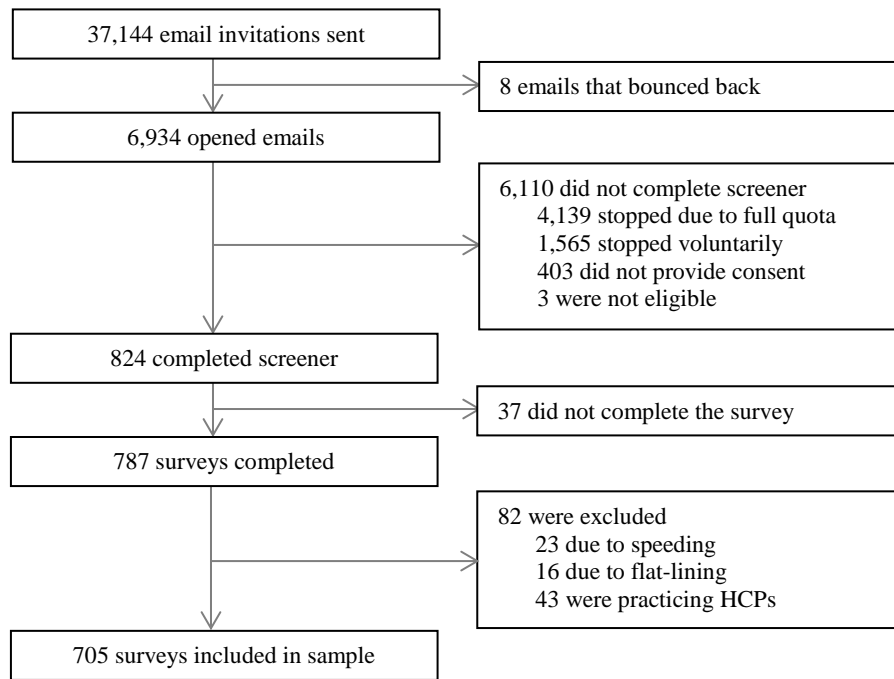

**Figure S3a.** Online sample recruitment flow diagram – France

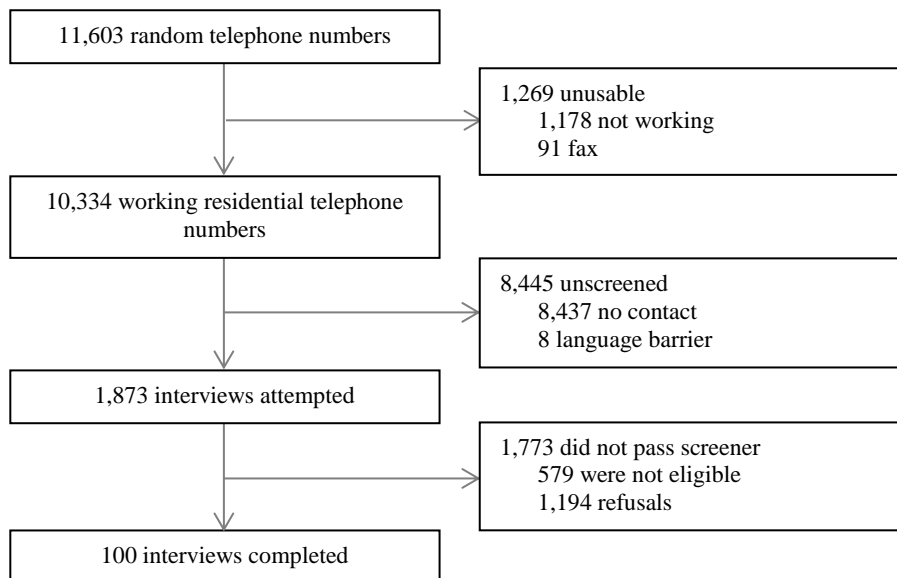

**Figure S3b.** Telephone sample recruitment flow diagram – France

**Box S1. Key features of non-probability online panels**

A non-probability online panel is a panel of participants (usually large – over 1 million people), which is not representative of the whole population of a country. This is because such panels include those who can and are interested in participating, usually for a fee, and do not normally include people who cannot or are less able to use the internet. Therefore, employing a combined recruitment strategy to access the latter segments, such as telephone interviews, is advisable.

**Box S2. Description of the logistic regression procedure**

Firstly, we generated a model per country entering all the variables at the same time (M1). Secondly, we manually removed the variables which were not significant in M1, but retained as controls all demographic, socio-economic and health variables, as follows. We generated a different model per country which included all the significant variables and all the non-significant variables except for one. This procedure was repeated for each one of the non-significant variables – resulting in 12 different specifications in the US, 11 in the UK and 21 in France – and checked the robustness of the results by assessing changes in the significance of the relationship between the independent and dependent variables. Thirdly, variables that were significant across most specifications and controls were entered in “blocks” using a hierarchical approach (M2-M8), to understand their role in explaining vaccination behaviour. The order in which the blocks of variables were entered was based upon previous evidence and our aim of assessing the importance of policy amenable factors in explaining influenza vaccination. This is because when predictors are correlated, as it is often the case, the order of variable entry can have an effect on the estimated model parameters. Thus, blocks of variables were entered in a sequence according to their conceptual importance: variables which had been frequently associated with vaccination uptake in the past were entered first and those which had been explored less were entered last. We prioritised demographic, socio-economic and health variables, and practical vaccination barriers, to allow these variables to account for the variance in vaccination behaviour before socio-psychological variables were incorporated. Seven blocks of explanatory variables were entered in the following order: 1) demographic, socio-economic and health-related variables; 2) practical barriers to influenza vaccination; 3) social influence; 4) influenza perceptions; 5) influenza vaccine perceptions; 6) trust in vaccination stakeholders; and 7) shared decision-making and childhood experiences.

**Table S1.** Included survey items

| <b>Item</b>                                                                                                                       | <b>Response categories</b>                                                                                                                                                                                                                                                                                                                                                                                                                                                                                                                                                                                                                                                                                                                                                                                                    |
|-----------------------------------------------------------------------------------------------------------------------------------|-------------------------------------------------------------------------------------------------------------------------------------------------------------------------------------------------------------------------------------------------------------------------------------------------------------------------------------------------------------------------------------------------------------------------------------------------------------------------------------------------------------------------------------------------------------------------------------------------------------------------------------------------------------------------------------------------------------------------------------------------------------------------------------------------------------------------------|
| 1) Have you received a flu vaccine in the past 6 months (this autumn / winter)?                                                   | Yes / no                                                                                                                                                                                                                                                                                                                                                                                                                                                                                                                                                                                                                                                                                                                                                                                                                      |
| 2) What is your date of birth?                                                                                                    | Date                                                                                                                                                                                                                                                                                                                                                                                                                                                                                                                                                                                                                                                                                                                                                                                                                          |
| 3) What is your gender?                                                                                                           | Female / male                                                                                                                                                                                                                                                                                                                                                                                                                                                                                                                                                                                                                                                                                                                                                                                                                 |
| 4) Which of the following ethnic groups do you feel you belong to?                                                                | List of country-specific groups                                                                                                                                                                                                                                                                                                                                                                                                                                                                                                                                                                                                                                                                                                                                                                                               |
| 5) What is your combined annual household income?                                                                                 | List of country-specific income brackets                                                                                                                                                                                                                                                                                                                                                                                                                                                                                                                                                                                                                                                                                                                                                                                      |
| 6) Which of the following best describes your current situation?                                                                  | Married or living with a partner / single / widowed / divorced or separated /other / prefer not to say                                                                                                                                                                                                                                                                                                                                                                                                                                                                                                                                                                                                                                                                                                                        |
| 7) Have you ever been diagnosed with any of the following conditions?                                                             | List of eligible conditions                                                                                                                                                                                                                                                                                                                                                                                                                                                                                                                                                                                                                                                                                                                                                                                                   |
| 8) What is the highest level of education you have completed?                                                                     | List of country-specific education levels                                                                                                                                                                                                                                                                                                                                                                                                                                                                                                                                                                                                                                                                                                                                                                                     |
| 9) Do you have a private health insurance                                                                                         | Yes / no                                                                                                                                                                                                                                                                                                                                                                                                                                                                                                                                                                                                                                                                                                                                                                                                                      |
| 10) Do you have public health insurance (e.g. Medicare) – US only                                                                 | Yes / no                                                                                                                                                                                                                                                                                                                                                                                                                                                                                                                                                                                                                                                                                                                                                                                                                      |
| 11) How actively do you participate with your physician in making decisions about health, generally? (Single select)              | <ol style="list-style-type: none"> <li>1. My physician always makes decisions for me</li> <li>2. I like to know the options available but still let my physician decide for me</li> <li>3. My physician and I make decisions together</li> <li>4. I make decisions for myself, after considering the advice of my physician</li> <li>5. I always make my own decisions, independently of the advice of my physician</li> </ol>                                                                                                                                                                                                                                                                                                                                                                                                |
| 12) Which of the following statements best represents how much you trust your physician? (Multiple select)                        | <ul style="list-style-type: none"> <li><input type="radio"/> I can tell my physician anything, even things that I might not tell anyone else</li> <li><input type="radio"/> My physician sometimes pretends to know things when he / she is not really sure</li> <li><input type="radio"/> I completely trust my physician’s judgment about my medical care</li> <li><input type="radio"/> My physician cares more about cutting down costs than about doing what is needed for my health</li> <li><input type="radio"/> My physician would always tell me the truth about my health, even if there was bad news</li> <li><input type="radio"/> My physician cares as much as I do about my health</li> <li><input type="radio"/> If a mistake was made in my treatment, my physician would try to hide it from me</li> </ul> |
| 13) I generally trust vaccine manufacturers / pharmaceutical companies                                                            | Scale 0-10: strongly disagree / strongly agree                                                                                                                                                                                                                                                                                                                                                                                                                                                                                                                                                                                                                                                                                                                                                                                |
| 14) I generally trust the National Health Service (or equivalent)                                                                 | Scale 0-10: strongly disagree / strongly agree                                                                                                                                                                                                                                                                                                                                                                                                                                                                                                                                                                                                                                                                                                                                                                                |
| 15) Which of these statements best represents your past experiences as a child? (Multiple select)                                 | <ul style="list-style-type: none"> <li><input type="radio"/> I had a bad experience with vaccines or injections</li> <li><input type="radio"/> I had a scary health-related experience</li> </ul>                                                                                                                                                                                                                                                                                                                                                                                                                                                                                                                                                                                                                             |
| 16) I am scared of getting the flu                                                                                                | Scale 0-10: strongly disagree / strongly agree                                                                                                                                                                                                                                                                                                                                                                                                                                                                                                                                                                                                                                                                                                                                                                                |
| 17) I believe that if I got the flu I would have to stay in bed for... (Single select)                                            | <ol style="list-style-type: none"> <li>1.0 days</li> <li>2.1-2 days</li> <li>3.3-4 days</li> <li>4.5-6 days</li> <li>5.1 week – 2 weeks</li> <li>6. More than 2 weeks</li> </ol>                                                                                                                                                                                                                                                                                                                                                                                                                                                                                                                                                                                                                                              |
| 18) The flu could make me severely ill                                                                                            | Scale 0-10: strongly disagree / strongly agree                                                                                                                                                                                                                                                                                                                                                                                                                                                                                                                                                                                                                                                                                                                                                                                |
| 19) If I get a flu vaccine, I will be protected against the flu                                                                   | Scale 0-10: strongly disagree / strongly agree                                                                                                                                                                                                                                                                                                                                                                                                                                                                                                                                                                                                                                                                                                                                                                                |
| 20) With no flu vaccine, I would feel very vulnerable to the flu                                                                  | Scale 0-10: strongly disagree / strongly agree                                                                                                                                                                                                                                                                                                                                                                                                                                                                                                                                                                                                                                                                                                                                                                                |
| 21) If I got the flu, I would feel sicker than other people my age                                                                | Scale 0-10: strongly disagree / strongly agree                                                                                                                                                                                                                                                                                                                                                                                                                                                                                                                                                                                                                                                                                                                                                                                |
| 22) I am confident I can avoid getting the flu, even without the flu vaccine                                                      | Scale 0-10: strongly disagree / strongly agree                                                                                                                                                                                                                                                                                                                                                                                                                                                                                                                                                                                                                                                                                                                                                                                |
| 23) Without a flu vaccine, I am sure I would get the flu this winter                                                              | Scale 0-10: strongly disagree / strongly agree                                                                                                                                                                                                                                                                                                                                                                                                                                                                                                                                                                                                                                                                                                                                                                                |
| 24) I feel I know enough about the flu vaccine to make an informed decision about whether to get vaccinated or not                | Scale 0-10: strongly disagree / strongly agree                                                                                                                                                                                                                                                                                                                                                                                                                                                                                                                                                                                                                                                                                                                                                                                |
| 25) My physician thinks I should get a flu vaccine                                                                                | Scale 0-10: strongly disagree / strongly agree<br><input type="radio"/> I don’t know/not applicable                                                                                                                                                                                                                                                                                                                                                                                                                                                                                                                                                                                                                                                                                                                           |
| 26) My relatives or close friends think that I should get a flu vaccine                                                           | Scale 0-10: strongly disagree / strongly agree<br><input type="radio"/> I don’t know/not applicable                                                                                                                                                                                                                                                                                                                                                                                                                                                                                                                                                                                                                                                                                                                           |
| 27) If I don’t get the flu vaccine and I get the flu, passing the flu to other people would worry me because it would be my fault | Scale 0-10: strongly disagree / strongly agree                                                                                                                                                                                                                                                                                                                                                                                                                                                                                                                                                                                                                                                                                                                                                                                |
| 28) Which of the following statements apply to you? (Multiple select)                                                             | <ul style="list-style-type: none"> <li><input type="radio"/> It is easy for me to get to a place where I can get the flu vaccine</li> </ul>                                                                                                                                                                                                                                                                                                                                                                                                                                                                                                                                                                                                                                                                                   |

|                                                                                                                 |                                                                  |
|-----------------------------------------------------------------------------------------------------------------|------------------------------------------------------------------|
|                                                                                                                 | ○ I can make time to get the flu vaccine                         |
| 29) If I don't get a flu vaccine and end up getting the flu this winter, I would regret not getting the vaccine | Scale 0-10: strongly disagree / strongly agree                   |
| 30) The flu vaccine is painful                                                                                  | Scale 0-10: strongly disagree / strongly agree<br>○ I don't know |
| 31) The flu vaccine could give me the flu                                                                       | Scale 0-10: strongly disagree / strongly agree                   |
| 32) I am worried that some of the contents of the flu vaccine may be dangerous for me                           | Scale 0-10: strongly disagree / strongly agree                   |
| 33) I am confident I can get a flu vaccine if I want one                                                        | Scale 0-10: strongly disagree / strongly agree                   |

**Table S2.** Determinants of influenza vaccination by influenza vaccination status – US

| Explanatory variables                                      | Min | Max | Vaccinated |      |       | Unvaccinated |           |      | SE    | 95% C.I. |       | t/X2   | df     | p-value |        |       |
|------------------------------------------------------------|-----|-----|------------|------|-------|--------------|-----------|------|-------|----------|-------|--------|--------|---------|--------|-------|
|                                                            |     |     | Total/yes  | M    | SD    | SE           | Total/yes | M    |       | SD       | SE    |        |        |         | Lower  | Upper |
| <b>1. Socio-economic, demographic and health variables</b> |     |     |            |      |       |              |           |      |       |          |       |        |        |         |        |       |
| 2) Age (dummy: 1 = ≥65)                                    | 0   | 1   | 378/105    | -    | -     | -            | 423/54    | -    | -     | -        | -     | -      | -      | 28.275  | 1.000  | 0.001 |
| 7) Eligible health condition (dummy: 1 = yes)              | 0   | 1   | 378/135    | -    | -     | -            | 423/64    | -    | -     | -        | -     | -      | -      | 45.299  | 1.000  | 0.001 |
| 9) Private health insurance (dummy: 1 = yes)               | 0   | 1   | 378/253    | -    | -     | -            | 423/234   | -    | -     | -        | -     | -      | -      | 11.293  | 1.000  | 0.001 |
| 10) Public health insurance (dummy: 1 = yes)               | 0   | 1   | 378/170    | -    | -     | -            | 423/122   | -    | -     | -        | -     | -      | -      | 22.425  | 1.000  | 0.001 |
| 3) Gender (dummy: 1 = female)                              | 0   | 1   | 378/182    | -    | -     | -            | 423/218   | -    | -     | -        | -     | -      | -      | 0.917   | 1.000  | 0.99  |
| 6) Marital status (dummy: 1 = in a partnership)            | 0   | 1   | 374/245    | -    | -     | -            | 418/236   | -    | -     | -        | -     | -      | -      | 6.777   | 1.000  | 0.01  |
| 5) Income bands (1 = ≤\$10,000 - 9 = ≥\$150,000)           | 1   | 9   | 343        | 2.97 | 1.760 | 0.106        | 392       | 5.00 | 2.239 | .113     | 0.162 | -1.207 | -0.572 | -5.495  | 733.00 | 0.001 |
| 8) Level of education (dummy: 1 = university degree)       | 0   | 1   | 365/228    | -    | -     | -            | 399/207   | -    | -     | -        | -     | -      | -      | 8.712   | 1.000  | 0.01  |
| 4) Ethnicity (dummy: 1 = white)                            | 0   | 1   | 375/262    | -    | -     | -            | 420/291   | -    | -     | -        | -     | -      | -      | 0.032   | 1.000  | 0.99  |
| <b>2. Practical barriers to influenza vaccination</b>      |     |     |            |      |       |              |           |      |       |          |       |        |        |         |        |       |
| 28) Vaccine access (dummy: 1 = yes)                        | 0   | 1   | 378/340    | -    | -     | -            | 423/317   | -    | -     | -        | -     | -      | -      | 30.484  | 1.000  | 0.001 |
| 28) Time to vaccinate (dummy: 1 = yes)                     | 0   | 1   | 378/336    | -    | -     | -            | 423/282   | -    | -     | -        | -     | -      | -      | 55.924  | 1.000  | 0.001 |
| <b>3. Social influence</b>                                 |     |     |            |      |       |              |           |      |       |          |       |        |        |         |        |       |
| 25) Physician thinks I should vaccinate*                   | 0   | 10  | 354        | 9.00 | 1.755 | 0.093        | 338       | 5.86 | 3.393 | 0.185    | 0.207 | -3.543 | -2.730 | -15.166 | 499.95 | 0.001 |
| 26) Relatives think I should vaccinate*                    | 0   | 10  | 329        | 8.02 | 2.405 | 0.133        | 361       | 4.67 | 3.277 | 0.172    | 0.218 | -3.775 | -2.921 | -15.391 | 658.72 | 0.001 |
| <b>4. Influenza perceptions</b>                            |     |     |            |      |       |              |           |      |       |          |       |        |        |         |        |       |
| 20) Vulnerability to influenza                             | 0   | 10  | 378        | 7.47 | 2.587 | 0.133        | 423       | 3.14 | 2.865 | 0.139    | 0.193 | -4.712 | -3.956 | -22.502 | 798.91 | 0.001 |
| 21) Susceptibility to influenza                            | 0   | 10  | 378        | 4.80 | 3.177 | 0.163        | 423       | 3.68 | 2.902 | 0.141    | 0.215 | -1.550 | -0.706 | -5.251  | 799.00 | 0.001 |
| 23) Likelihood of influenza                                | 0   | 10  | 378        | 5.76 | 2.868 | 0.147        | 423       | 2.22 | 2.607 | 0.127    | 0.194 | -3.926 | -3.163 | -18.226 | 766.19 | 0.001 |
| 17) Severity of influenza (bed days)                       | 1   | 6   | 378        | 2.94 | 1.149 | 0.059        | 423       | 2.66 | 1.108 | 0.054    | 0.080 | -0.437 | -0.123 | -3.510  | 799.00 | 0.001 |
| 18) Severity of influenza                                  | 0   | 10  | 378        | 7.74 | 2.591 | 0.133        | 423       | 6.36 | 2.701 | 0.131    | 0.188 | -1.745 | -1.009 | -7.341  | 799.00 | 0.001 |
| 16) Fear of influenza                                      | 0   | 10  | 378        | 5.26 | 3.276 | 0.169        | 423       | 3.57 | 2.958 | 0.144    | 0.222 | -2.132 | -1.262 | -7.659  | 764.04 | 0.001 |
| 27) Worry of transmitting influenza                        | 0   | 10  | 378        | 6.76 | 3.019 | 0.155        | 423       | 4.83 | 3.198 | 0.155    | 0.220 | -2.365 | -1.499 | -8.764  | 799.00 | 0.001 |
| 22) Perceived control (over influenza)                     | 0   | 10  | 378        | 3.68 | 3.065 | 0.158        | 423       | 6.49 | 2.741 | 0.133    | 0.206 | 2.412  | 3.222  | 13.645  | 761.04 | 0.001 |
| 29) Anticipated regret of not vaccinating                  | 0   | 10  | 378        | 7.11 | 3.118 | 0.160        | 423       | 6.66 | 2.823 | 0.137    | 0.210 | -0.862 | -0.037 | -2.141  | 799.00 | 0.05  |
| <b>5. Influenza vaccine perceptions</b>                    |     |     |            |      |       |              |           |      |       |          |       |        |        |         |        |       |
| 24) Perceived knowledge of vaccine (informed decisions)*   | 0   | 10  | 377        | 8.42 | 2.150 | 0.111        | 423       | 7.12 | 2.597 | 0.126    | 0.168 | -1.631 | -0.972 | -7.750  | 793.77 | 0.001 |
| 19) Vaccine effectiveness                                  | 0   | 10  | 378        | 7.38 | 2.172 | 0.112        | 423       | 4.12 | 2.942 | 0.143    | 0.182 | -3.612 | -2.899 | -17.934 | 772.19 | 0.001 |
| 30) The vaccine is painful*                                | 0   | 10  | 377        | 3.00 | 3.231 | 0.166        | 356       | 3.73 | 3.099 | 0.164    | 0.234 | 0.271  | 1.190  | 3.120   | 731.00 | 0.01  |
| 31) The vaccine could transmit influenza                   | 0   | 10  | 378        | 3.01 | 3.270 | 0.168        | 423       | 5.58 | 3.222 | 0.157    | 0.230 | 2.128  | 3.029  | 11.228  | 799.00 | 0.001 |
| 32) Vaccine contents could be dangerous                    | 0   | 10  | 378        | 3.03 | 3.173 | 0.163        | 423       | 5.31 | 3.364 | 0.164    | 0.232 | 1.828  | 2.738  | 9.849   | 799.00 | 0.001 |
| 33) Vaccine-related self-efficacy                          | 0   | 10  | 378        | 7.93 | 2.736 | 0.141        | 423       | 4.20 | 3.389 | 0.165    | 0.217 | -4.156 | -3.305 | -17.213 | 791.02 | 0.001 |

| Explanatory variables                                      | Min | Max | Vaccinated |      |       | Unvaccinated |        |      | SE    | 95% C.I. |       | t / $\chi^2$ | df     | p <     |        |       |
|------------------------------------------------------------|-----|-----|------------|------|-------|--------------|--------|------|-------|----------|-------|--------------|--------|---------|--------|-------|
|                                                            |     |     | N          | Mean | SD    | SE           | N      | Mean |       | SD       | SE    |              |        |         | Lower  | Upper |
| <b>6. Trust in vaccination stakeholders</b>                |     |     |            |      |       |              |        |      |       |          |       |              |        |         |        |       |
| 12) Trust physician (scale)                                | 0   | 7   | 378        | 7.94 | 2.261 | 0.119        | 423    | 4.35 | 1.561 | 0.076    | 0.115 | -0.579       | -0.129 | -3.087  | 773.65 | 0.01  |
| 13) Trust in vaccine manufacturers                         | 0   | 10  | 378        | 7.04 | 2.212 | 0.114        | 423    | 4.78 | 2.732 | 0.133    | 0.181 | -2.209       | -1.499 | -10.255 | 798.57 | 0.001 |
| 14) Trust in the NHS                                       | 0   | 10  | 378        | 4.71 | 1.672 | 0.086        | 423    | 5.47 | 2.751 | 0.134    | 0.176 | -1.914       | -1.225 | -8.937  | 790.44 | 0.001 |
| <b>7. Shared decision-making and childhood experiences</b> |     |     |            |      |       |              |        |      |       |          |       |              |        |         |        |       |
| 11) Shared decision-making – physician                     | 1   | 5   | 378        | 3.03 | 0.889 | 0.046        | 423    | 3.30 | 0.953 | 0.046    | 0.065 | 0.141        | 0.396  | 4.127   | 797.52 | 0.001 |
| 15) Bad experience with vaccines (child)                   | 0   | 1   | 378/41     | -    | -     | -            | 423/36 | -    | -     | -        | -     | -            | -      | 1.254   | 1.000  | 0.99  |
| 15) Scary health experience (child)                        | 0   | 1   | 378/48     | -    | -     | -            | 423/31 | -    | -     | -        | -     | -            | -      | 6.475   | 1.000  | 0.01  |

C.I. = confidence interval; df = degrees of freedom; DoH = Department of Health; HCP = healthcare professional; p = p-value; SD = standard deviation; SE = standard error. df with decimals are adjusted to correct for the violation of the assumption of equal variances (Levene's Test for Equality of Variances was statistically significant). p-values were obtained using Chi-square tests ( $\chi^2$ ) for categorical variables and Independent t-tests (t) for interval or continuous variables. p < 0.05 was considered statistically significant. \*Variables with "I do not know" responses which were dichotomised for regression analysis. In brackets is the number of the question corresponding to each explanatory variable (see Table S1).



**Table S3.** Determinants of influenza vaccination by influenza vaccination status – UK

| Explanatory variables                                      | Min | Max | Vaccinated |      |        |       | Unvaccinated |      |        |       | SE     | 95% C.I. |        | t/X2    | df     | p-value |
|------------------------------------------------------------|-----|-----|------------|------|--------|-------|--------------|------|--------|-------|--------|----------|--------|---------|--------|---------|
|                                                            |     |     | Total/yes  | M    | SD     | SE    | Total/yes    | M    | SD     | SE    |        | Lower    | Upper  |         |        |         |
| <b>1. Socio-economic, demographic and health variables</b> |     |     |            |      |        |       |              |      |        |       |        |          |        |         |        |         |
| 2) Age (dummy: 1 = ≥65)                                    | 0   | 1   | 302/134    | -    | -      | -     | 504/45       | -    | -      | -     | -      | -        | -      | 137.30  | 1.000  | 0.001   |
| 7) Eligible health condition (dummy: 1 = yes)              | 0   | 1   | 302/141    | -    | -      | -     | 504/42       | -    | -      | -     | -      | -        | -      | 166.87  | 1.000  | 0.001   |
| 9) Private health insurance (dummy: 1 = yes)               | 0   | 1   | 302/52     | -    | -      | -     | 504/57       | -    | -      | -     | -      | -        | -      | 5.638   | 1.000  | 0.05    |
| 3) Gender (dummy: 1 = female)                              | 0   | 1   | 302/147    | -    | -      | -     | 504/266      | -    | -      | -     | -      | -        | -      | 1.272   | 1.000  | 0.99    |
| 6) Marital status (dummy: 1 = in a partnership)            | 0   | 1   | 300/177    | -    | -      | -     | 501/270      | -    | -      | -     | -      | -        | -      | 1.985   | 1.000  | 0.99    |
| 5) Income bands (1 = ≤£10,000 - 8 = ≥£70,000)              | 1   | 8   | 274        | 2.97 | 1.760  | 0.106 | 472          | 3.19 | 1.853  | 0.086 | 0.139  | -0.055   | 0.490  | 1.568   | 734.00 | 0.99    |
| 8) Level of education (dummy: 1 = university degree)       | 0   | 1   | 292/103    | -    | -      | -     | 492/198      | -    | -      | -     | -      | -        | -      | 1.914   | 1.000  | 0.99    |
| 4) Ethnicity (1 = white)                                   | 0   | 1   | 302/278    | -    | -      | -     | 497/435      | -    | -      | -     | -      | -        | -      | 4.010   | 1.000  | 0.05    |
| <b>2. Practical barriers to influenza vaccination</b>      |     |     |            |      |        |       |              |      |        |       |        |          |        |         |        |         |
| 28) Vaccine access (dummy: 1 = yes)                        | 0   | 1   | 302/281    | -    | -      | -     | 504/371      | -    | -      | -     | -      | -        | -      | 46.151  | 1.000  | 0.001   |
| 28) Time to vaccinate (dummy: 1 = yes)                     | 0   | 1   | 302/270    | -    | -      | -     | 504/360      | -    | -      | -     | -      | -        | -      | 35.750  | 1.000  | 0.001   |
| <b>3. Social influence</b>                                 |     |     |            |      |        |       |              |      |        |       |        |          |        |         |        |         |
| 25) Physician thinks I should vaccinate*                   | 0   | 10  | 271        | 8.86 | 1.943  | 0.118 | 370          | 3.38 | 3.307  | 0.182 | 0.217  | -5.906   | -5.054 | -25.261 | 546.17 | 0.001   |
| 26) Relatives think I should vaccinate*                    | 0   | 10  | 255        | 7.52 | 2.691  | 0.169 | 390          | 2.80 | 3.005  | 0.152 | 0.227  | -5.161   | -4.269 | -20.767 | 583.61 | 0.001   |
| <b>4. Influenza perceptions</b>                            |     |     |            |      |        |       |              |      |        |       |        |          |        |         |        |         |
| 20) Vulnerability to influenza                             | 0   | 10  | 302        | 7.22 | 2.6893 | 0.155 | 504          | 3.10 | 2.5019 | 0.111 | -4.112 | -4.480   | -3.744 | -21.956 | 804.00 | 0.001   |
| 21) Susceptibility to influenza                            | 0   | 10  | 302        | 5.28 | 3.162  | 0.182 | 504          | 3.36 | 2.805  | 0.125 | -1.924 | -2.358   | -1.491 | -8.719  | 575.29 | 0.001   |
| 23) Likelihood of influenza                                | 0   | 10  | 302        | 5.66 | 2.707  | 0.156 | 504          | 2.31 | 2.480  | 0.110 | -3.348 | -3.715   | -2.981 | -17.921 | 804.00 | 0.001   |
| 17) Severity of influenza (bed days)                       | 1   | 6   | 302        | 3.14 | 1.216  | 0.070 | 504          | 2.83 | 1.227  | 0.055 | -0.311 | -0.486   | -0.136 | -3.496  | 804.00 | 0.001   |
| 18) Severity of influenza                                  | 0   | 10  | 302        | 7.90 | 2.396  | 0.138 | 504          | 6.06 | 2.552  | 0.114 | -1.836 | -2.187   | -1.485 | -10.273 | 665.45 | 0.001   |
| 16) Fear of influenza                                      | 0   | 10  | 302        | 4.87 | 3.200  | 0.184 | 504          | 3.14 | 2.696  | 0.120 | -1.732 | -2.164   | -1.300 | -7.879  | 551.80 | 0.001   |
| 27) Worry of transmitting influenza                        | 0   | 10  | 302        | 6.64 | 2.900  | 0.167 | 504          | 4.70 | 2.920  | 0.130 | -1.937 | -2.353   | -1.521 | -9.140  | 804.00 | 0.001   |
| 22) Perceived control (over influenza)                     | 0   | 10  | 302        | 3.21 | 2.703  | 0.156 | 504          | 5.68 | 2.595  | 0.116 | 2.472  | 2.095    | 2.849  | 12.886  | 804.00 | 0.001   |
| 29) Anticipated regret of not vaccinating                  | 0   | 10  | 302        | 8.52 | 2.176  | 0.125 | 504          | 3.94 | 3.027  | 0.135 | -4.582 | -4.943   | -4.221 | -24.901 | 777.86 | 0.001   |
| <b>5. Influenza vaccine perceptions</b>                    |     |     |            |      |        |       |              |      |        |       |        |          |        |         |        |         |
| 24) Perceived knowledge of vaccine (informed decisions)*   | 0   | 10  | 301        | 8.26 | 2.033  | 0.117 | 502          | 6.44 | 2.611  | 0.117 | -1.826 | -2.151   | -1.502 | -11.050 | 748.41 | 0.001   |
| 19) Vaccine effectiveness                                  | 0   | 10  | 302        | 7.50 | 2.194  | 0.126 | 504          | 5.24 | 2.768  | 0.123 | -2.257 | -2.603   | -1.910 | -12.786 | 743.90 | 0.001   |
| 30) The vaccine is painful*                                | 0   | 10  | 299        | 2.38 | 2.958  | 0.171 | 364          | 3.06 | 2.899  | 0.152 | 0.228  | 0.231    | 1.128  | 2.977   | 661.00 | 0.01    |
| 31) The vaccine could transmit influenza                   | 0   | 10  | 302        | 2.80 | 3.090  | 0.178 | 504          | 4.18 | 3.019  | 0.135 | 1.377  | 0.941    | 1.812  | 6.210   | 804.00 | 0.001   |
| 32) Vaccine contents could be dangerous                    | 0   | 10  | 302        | 2.41 | 2.758  | 0.159 | 504          | 3.42 | 2.992  | 0.133 | 1.008  | 0.601    | 1.415  | 4.863   | 674.42 | 0.001   |
| 33) Vaccine-related self-efficacy                          | 0   | 10  | 302        | 9.05 | 1.803  | 0.104 | 504          | 7.16 | 2.880  | 0.128 | -1.890 | -2.214   | -1.566 | -11.449 | 802.47 | 0.001   |

| Explanatory variables                                      | Min | Max | Vaccinated |      |       | Unvaccinated |        |      | SE    | 95% C.I. |        | t / $\chi^2$ | df     | p <    |        |       |
|------------------------------------------------------------|-----|-----|------------|------|-------|--------------|--------|------|-------|----------|--------|--------------|--------|--------|--------|-------|
|                                                            |     |     | N          | Mean | SD    | SE           | N      | Mean |       | SD       | SE     |              |        |        | Lower  | Upper |
| <b>6. Trust in vaccination stakeholders</b>                |     |     |            |      |       |              |        |      |       |          |        |              |        |        |        |       |
| 12) Trust physician (scale)                                | 0   | 7   | 302        | 4.68 | 1.742 | 0.100        | 504    | 3.99 | 1.538 | 0.069    | -0.687 | -0.925       | -0.448 | -5.655 | 572.95 | 0.001 |
| 13) Trust in vaccine manufacturers                         | 0   | 10  | 302        | 6.71 | 2.187 | 0.126        | 504    | 5.58 | 2.513 | 0.112    | -1.127 | -1.458       | -0.796 | -6.691 | 702.58 | 0.001 |
| 14) Trust in the NHS                                       | 0   | 10  | 302        | 7.71 | 1.954 | 0.112        | 504    | 6.86 | 2.156 | 0.096    | -0.849 | -1.146       | -0.551 | -5.599 | 804.00 | 0.001 |
| <b>7. Shared decision-making and childhood experiences</b> |     |     |            |      |       |              |        |      |       |          |        |              |        |        |        |       |
| 11) Shared decision-making – physician                     | 1   | 5   | 302        | 2.85 | 0.908 | 0.052        | 504    | 3.21 | 1.000 | 0.045    | 0.357  | 0.223        | 0.492  | 5.203  | 681.88 | 0.001 |
| 15) Bad experience with vaccines (child)                   | 0   | 1   | 302/22     | -    | -     | -            | 504/63 | -    | -     | -        | -      | -            | -      | 5.445  | 1.000  | 0.05  |
| 15) Scary health experience (child)                        | 0   | 1   | 302/58     | -    | -     | -            | 504/45 | -    | -     | -        | -      | -            | -      | 17.893 | 1.000  | 0.001 |

C.I. = confidence interval; df = degrees of freedom; NHS = National Health Service; HCP = healthcare professional; p = p-value; SD = standard deviation; SE = standard error. df with decimals are adjusted to correct for the violation of the assumption of equal variances (Levene's Test for Equality of Variances was statistically significant). p-values were obtained using Chi-square tests ( $\chi^2$ ) for categorical variables and Independent t-tests (t) for interval or continuous variables. p < 0.05 was considered statistically significant. \*Variables with "I do not know" responses which were dichotomised for regression analysis. In brackets is the number of the question corresponding to each explanatory variable (see Table S1).

**Table S4.** Determinants of influenza vaccination by influenza vaccination status – France

| Explanatory variables                                      | Min | Max | Vaccinated |      |       |       | Unvaccinated |      |       |       | SE    | 95% C.I. |        | t/X2    | df     | p-value |
|------------------------------------------------------------|-----|-----|------------|------|-------|-------|--------------|------|-------|-------|-------|----------|--------|---------|--------|---------|
|                                                            |     |     | Total/yes  | M    | SD    | SE    | Total/yes    | M    | SD    | SE    |       | Lower    | Upper  |         |        |         |
| <b>1. Socio-economic, demographic and health variables</b> |     |     |            |      |       |       |              |      |       |       |       |          |        |         |        |         |
| 2) Age (dummy: 1 = ≥65)                                    | 0   | 1   | 192/95     | -    | -     | -     | 613/94       | -    | -     | -     | -     | -        | -      | 94.877  | 1.000  | 0.001   |
| 7) Eligible health condition (dummy: 1 = yes)              | 0   | 1   | 192/71     | -    | -     | -     | 613/120      | -    | -     | -     | -     | -        | -      | 24.469  | 1.000  | 0.001   |
| 9) Private health insurance (dummy: 1 = yes)               | 0   | 1   | 192/180    | -    | -     | -     | 613/529      | -    | -     | -     | -     | -        | -      | 7.732   | 1.000  | 0.005   |
| 3) Gender (dummy: 1 = female)                              | 0   | 1   | 192/97     | -    | -     | -     | 613/334      | -    | -     | -     | -     | -        | -      | 0.924   | 1.000  | 0.99    |
| 6) Marital status (dummy: 1 = in a partnership)            | 0   | 1   | 190/120    | -    | -     | -     | 605/314      | -    | -     | -     | -     | -        | -      | 7.391   | 1.000  | 0.01    |
| 5) Income bands (1 = ≤€15,000 - 6 = ≥€70,000)              | 1   | 6   | 165        | 2.78 | 1.269 | 0.099 | 539          | 2.35 | 1.272 | 0.055 | 0.11  | -0.65    | -0.21  | -3.81   | 702.00 | 0.001   |
| 8) Level of education (dummy: 1 = university degree)       | 0   | 1   | 182/64     | -    | -     | -     | 570/171      | -    | -     | -     | -     | -        | -      | 1.713   | 1.000  | 0.99    |
| <b>2. Practical barriers to influenza vaccination</b>      |     |     |            |      |       |       |              |      |       |       |       |          |        |         |        |         |
| 28) Vaccine access (dummy: 1 = yes)                        | 0   | 1   | 192/159    | -    | -     | -     | 613/445      | -    | -     | -     | -     | -        | -      | 8.149   | 1.000  | 0.01    |
| 28) Time to vaccinate (dummy: 1 = yes)                     | 0   | 1   | 192/165    | -    | -     | -     | 613/436      | -    | -     | -     | -     | -        | -      | 16.954  | 1.000  | 0.001   |
| <b>3. Social influence</b>                                 |     |     |            |      |       |       |              |      |       |       |       |          |        |         |        |         |
| 25) Physician thinks I should vaccinate*                   | 0   | 10  | 180        | 8.11 | 2.536 | 0.189 | 490          | 3.58 | 3.120 | 0.141 | 0.24  | -4.99    | -4.06  | -19.20  | 389.34 | 0.001   |
| 26) Relatives think I should vaccinate*                    | 0   | 10  | 160        | 6.57 | 3.097 | 0.245 | 532          | 2.92 | 2.879 | 0.125 | 0.264 | -4.163   | -3.125 | -13.790 | 690.00 | 0.001   |
| <b>4. Influenza perceptions</b>                            |     |     |            |      |       |       |              |      |       |       |       |          |        |         |        |         |
| 20) Vulnerability to influenza                             | 0   | 10  | 192        | 6.53 | 3.020 | 0.218 | 613          | 3.20 | 2.720 | 0.110 | 0.231 | -3.784   | -2.877 | -14.410 | 803.00 | 0.001   |
| 21) Susceptibility to influenza                            | 0   | 10  | 192        | 4.24 | 3.160 | 0.228 | 613          | 3.33 | 2.917 | 0.118 | 0.246 | -1.390   | -0.424 | -3.683  | 803.00 | 0.001   |
| 23) Likelihood of influenza                                | 0   | 10  | 192        | 4.51 | 3.018 | 0.218 | 613          | 2.12 | 2.424 | 0.098 | 0.239 | -2.855   | -1.914 | -9.984  | 272.52 | 0.001   |
| 17) Severity of influenza (bed days)                       | 1   | 6   | 192        | 3.19 | 1.153 | 0.083 | 613          | 3.03 | 1.110 | 0.045 | 0.093 | -0.340   | 0.023  | -1.710  | 803.00 | 0.1     |
| 18) Severity of influenza                                  | 0   | 10  | 192        | 7.24 | 2.628 | 0.190 | 613          | 5.34 | 2.782 | 0.112 | 0.227 | -2.344   | -1.453 | -8.359  | 803.00 | 0.001   |
| 16) Fear of influenza                                      | 0   | 10  | 192        | 4.44 | 3.442 | 0.248 | 613          | 2.91 | 2.819 | 0.114 | 0.273 | -2.072   | -0.996 | -5.613  | 275.89 | 0.001   |
| 27) Worry of transmitting influenza                        | 0   | 10  | 192        | 6.81 | 2.780 | 0.201 | 613          | 4.95 | 2.925 | 0.118 | 0.239 | -2.327   | -1.389 | -7.771  | 803.00 | 0.001   |
| 22) Perceived control (over influenza)                     | 0   | 10  | 192        | 3.02 | 2.982 | 0.215 | 613          | 4.89 | 2.899 | 0.117 | 0.241 | 1.400    | 2.347  | 7.761   | 803.00 | 0.001   |
| 29) Anticipated regret of not vaccinating                  | 0   | 10  | 192        | 8.22 | 2.562 | 0.185 | 613          | 7.44 | 2.572 | 0.104 | 0.212 | -1.197   | -0.363 | -3.672  | 803.00 | 0.001   |
| <b>5. Influenza vaccine perceptions</b>                    |     |     |            |      |       |       |              |      |       |       |       |          |        |         |        |         |
| 24) Perceived knowledge of vaccine (informed decisions)*   | 0   | 10  | 192        | 7.86 | 2.186 | 0.158 | 613          | 6.44 | 2.637 | 0.106 | 0.190 | -1.803   | -1.055 | -7.508  | 380.14 | 0.001   |
| 19) Vaccine effectiveness                                  | 0   | 10  | 192        | 7.25 | 2.281 | 0.165 | 613          | 4.52 | 2.840 | 0.115 | 0.201 | -3.121   | -2.332 | -13.588 | 392.51 | 0.001   |
| 30) The vaccine is painful*                                | 0   | 10  | 190        | 1.68 | 2.678 | 0.194 | 449          | 2.59 | 2.649 | 0.125 | 0.231 | 0.454    | 1.363  | 3.931   | 352.50 | 0.001   |
| 31) The vaccine could transmit influenza                   | 0   | 10  | 192        | 2.98 | 2.970 | 0.214 | 613          | 4.46 | 3.063 | 0.124 | 0.251 | 0.977    | 1.964  | 5.848   | 803.00 | 0.001   |
| 32) Vaccine contents could be dangerous                    | 0   | 10  | 192        | 2.99 | 3.077 | 0.222 | 613          | 5.14 | 3.316 | 0.134 | 0.270 | 1.621    | 2.680  | 7.976   | 803.00 | 0.001   |
| 33) Vaccine-related self-efficacy                          | 0   | 10  | 192        | 8.04 | 2.561 | 0.185 | 613          | 3.92 | 3.214 | 0.130 | 0.226 | -4.559   | -3.671 | -18.218 | 395.86 | 0.001   |

| Explanatory variables                                      | Min | Max | Vaccinated |      |       | Unvaccinated |        |      | SE    | 95% C.I. |       | t / $\chi^2$ | df     | p <    |        |       |
|------------------------------------------------------------|-----|-----|------------|------|-------|--------------|--------|------|-------|----------|-------|--------------|--------|--------|--------|-------|
|                                                            |     |     | N          | Mean | SD    | SE           | N      | Mean |       | SD       | SE    |              |        |        | Lower  | Upper |
| <b>6. Trust in vaccination stakeholders</b>                |     |     |            |      |       |              |        |      |       |          |       |              |        |        |        |       |
| 12) Trust physician (scale)                                | 0   | 7   | 192        | 4.97 | 1.447 | 0.104        | 613    | 4.39 | 1.483 | 0.060    | 0.122 | -0.820       | -0.341 | -4.761 | 803.00 | 0.001 |
| 13) Trust in vaccine manufacturers                         | 0   | 10  | 192        | 6.18 | 2.345 | 0.169        | 613    | 4.82 | 2.553 | 0.103    | 0.207 | -1.763       | -0.950 | -6.548 | 803.00 | 0.001 |
| 14) Trust in the NHS                                       | 0   | 10  | 192        | 6.29 | 2.537 | 0.183        | 613    | 5.44 | 2.461 | 0.099    | 0.205 | -1.250       | -0.445 | -4.135 | 803.00 | 0.001 |
| <b>7. Shared decision-making and childhood experiences</b> |     |     |            |      |       |              |        |      |       |          |       |              |        |        |        |       |
| 11) Shared decision-making – physician                     | 1   | 5   | 192        | 2.49 | 2.557 | 0.106        | 613    | 2.90 | 0.962 | 0.039    | 0.071 | -0.077       | 0.204  | 0.890  | 364.72 | 0.99  |
| 15) Bad experience with vaccines (child)                   | 0   | 1   | 192/20     | -    | -     | -            | 613/96 | -    | -     | -        | -     | -            | -      | 3.260  | 1.000  | 0.1   |
| 15) Scary health experience (child)                        | 0   | 1   | 192/31     | -    | -     | -            | 613/34 | -    | -     | -        | -     | -            | -      | 22.129 | 1.000  | 0.001 |

C.I. = confidence interval; df = degrees of freedom; HCP = healthcare professional; MH = Ministry of Health; p = p-value; SD = standard deviation; SE = standard error. df with decimals are adjusted to correct for the violation of the assumption of equal variances (Levene's Test for Equality of Variances was statistically significant). p-values were obtained using Chi-square tests ( $\chi^2$ ) for categorical variables and Independent t-tests (t) for interval or continuous variables. p < 0.05 was considered statistically significant. \*Variables with "I do not know" responses which were dichotomised for regression analysis. In brackets is the number of the question corresponding to each explanatory variable (see Table S1).

**Table S5.** Reliability analysis of socio-psychological scales across the three countries

| Explanatory variables                    | US                |                                  | UK                |                                  | France            |                                  |
|------------------------------------------|-------------------|----------------------------------|-------------------|----------------------------------|-------------------|----------------------------------|
|                                          | Cronbach $\alpha$ | Corrected Item-Total Correlation | Cronbach $\alpha$ | Corrected Item-Total Correlation | Cronbach $\alpha$ | Corrected Item-Total Correlation |
| <b>Social influence</b>                  | <b>0.87</b>       |                                  | <b>0.85</b>       |                                  | <b>0.82</b>       |                                  |
| Physician thinks I should vaccinate      |                   | 0.78                             |                   | 0.74                             |                   | 0.69                             |
| Relatives think I should vaccinate       |                   | 0.78                             |                   | 0.74                             |                   | 0.69                             |
| <b>Influenza perceptions</b>             | <b>0.83</b>       |                                  | <b>0.80</b>       |                                  | <b>0.82</b>       |                                  |
| Vulnerability to influenza               |                   | 0.78                             |                   | 0.72                             |                   | 0.76                             |
| Susceptibility to influenza              |                   | 0.48                             |                   | 0.50                             |                   | 0.52                             |
| Likelihood of influenza                  |                   | 0.64                             |                   | 0.56                             |                   | 0.66                             |
| Severity of influenza                    |                   | 0.61                             |                   | 0.59                             |                   | 0.57                             |
| Severity of influenza (bed days)         |                   | 0.58                             |                   | 0.50                             |                   | 0.52                             |
| Fear of influenza                        |                   | 0.47                             |                   | 0.53                             |                   | 0.45                             |
| Worry of transmitting influenza          |                   | 0.28                             |                   | 0.23                             |                   | 0.22                             |
| Perceived control (over influenza)*      |                   | 0.32                             |                   | 0.14                             |                   | 0.35                             |
| Anticipated regret of not vaccinating    |                   | 0.61                             |                   | 0.63                             |                   | 0.67                             |
| <b>Influenza vaccine perceptions</b>     | <b>0.72</b>       |                                  | <b>0.65</b>       |                                  | <b>0.72</b>       |                                  |
| Vaccine contents could be dangerous*     |                   | 0.69                             |                   | 0.58                             |                   | 0.62                             |
| The vaccine could transmit influenza*    |                   | 0.65                             |                   | 0.56                             |                   | 0.61                             |
| The vaccine is painful*                  |                   | 0.39                             |                   | 0.32                             |                   | 0.45                             |
| Vaccine effectiveness                    |                   | 0.32                             |                   | 0.25                             |                   | 0.24                             |
| <b>Trust in vaccination stakeholders</b> | <b>0.86</b>       |                                  | <b>0.82</b>       |                                  | <b>0.72</b>       |                                  |
| Trust in vaccine manufacturers           |                   | 0.75                             |                   | 0.69                             |                   | 0.57                             |
| Trust in health authorities              |                   | 0.75                             |                   | 0.69                             |                   | 0.57                             |

Continuous scales were used for reliability analyses. “I don’t know/not applicable” responses were coded as missing for the purpose of this analysis. \*items that were reverse-scored to perform reliability analyses. The items “vaccine-related self-efficacy”, “perceived knowledge of vaccine” and “trust in GP (scale)” were not included because the former belong to different constructs and the latter is a standalone scale.
